# Supplementary material for: An Evaluation of Avian Influenza Virus Whole Genome Sequencing Approaches Using Nanopore Technology
Source: Preprints.org preprint supplement (doi:10.20944/preprints202301.0480.v1), 2023-01-26
Supplement: Supplementary file 1 [file supplementary]

## Formatted Alignments

|                    |     |                                                                |     |
|--------------------|-----|----------------------------------------------------------------|-----|
| NS 245625 MiSeq    | 1   | ATGGATTCCAACACTGTGTCAAGCTTTCAGGTAGACTGCTTTCTTTGGCATGTCCGCAAA   | 60  |
| NS 245626 Method A | 1   | ATGGATTCCAACACTGTGTCAAGCTTTCAGGTAGACTGCTTTCTTTGGCATGTCCGCAAA   | 60  |
| NS 245626 Method S | 1   | ATGGATTCCAACACTGTGTCAAGCTTTCAGGTAGACTGCTTTCTTTGGCATGTCCGCAAA   | 60  |
| NS 245626 Method K | 1   | ATGGATTCCAACACTGTGTCAAGCTTTCAGGTAGACTGCTTTCTTTGGCATGTCCGCAAA   | 60  |
| NS 245626 Method N | 1   | ATGGATTCCAACACTGTGTCAAGCTTTCAGGTAGACTGCTTTCTTTGGCATGTCCGCAAA   | 60  |
|                    |     |                                                                |     |
| NS 245625 MiSeq    | 61  | CGATTTGCAGACCAAGAAGCTGGGTGATGCCCCATTCCCTTGACCGGCTTCGCCGAGATCAG | 120 |
| NS 245626 Method A | 61  | CGATTTGCAGACCAAGAAGCTGGGTGATGCCCCATTCCCTTGACCGGCTTCGCCGAGATCAG | 120 |
| NS 245626 Method S | 61  | CGATTTGCAGACCAAGAAGCTGGGTGATGCCCCATTCCCTTGACCGGCTTCGCCGAGATCAG | 120 |
| NS 245626 Method K | 61  | CGATTTGCAGACCAAGAAGCTGGGTGATGCCCCATTCCCTTGACCGGCTTCGCCGAGATCAG | 120 |
| NS 245626 Method N | 61  | CGATTTGCAGACCAAGAAGCTGGGTGATGCCCCATTCCCTTGACCGGCTTCGCCGAGATCAG | 120 |
|                    |     |                                                                |     |
| NS 245625 MiSeq    | 121 | AAATCCCTGAGAGGAAGAGGCAGCACTCTTGGTCTGGGCATCGAAACAGCCACCCGTGCA   | 180 |
| NS 245626 Method A | 121 | AAATCCCTGAGAGGAAGAGGCAGCACTCTTGGTCTGGGCATCGAAACAGCCACCCGTGCA   | 180 |
| NS 245626 Method S | 121 | AAATCCCTGAGAGGAAGAGGCAGCACTCTTGGTCTGGGCATCGAAACAGCCACCCGTGCA   | 180 |
| NS 245626 Method K | 121 | AAATCCCTGAGAGGAAGAGGCAGCACTCTTGGTCTGGGCATCGAAACAGCCACCCGTGCA   | 180 |
| NS 245626 Method N | 121 | AAATCCCTGAGAGGAAGAGGCAGCACTCTTGGTCTGGGCATCGAAACAGCCACCCGTGCA   | 180 |
|                    |     |                                                                |     |
| NS 245625 MiSeq    | 181 | GGAAAGCAGATAGTGGAGCGGATTCTGGAAGAAGAATCTGATGAGACACTTAAAATGACT   | 240 |
| NS 245626 Method A | 181 | GGAAAGCAGATAGTGGAGCGGATTCTGGAAGAAGAATCTGATGAGACACTTAAAATGACT   | 240 |
| NS 245626 Method S | 181 | GGAAAGCAGATAGTGGAGCGGATTCTGGAAGAAGAATCTGATGAGACACTTAAAATGACT   | 240 |
| NS 245626 Method K | 181 | GGAAAGCAGATAGTGGAGCGGATTCTGGAAGAAGAATCTGATGAGACACTTAAAATGACT   | 240 |
| NS 245626 Method N | 181 | GGAAAGCAGATAGTGGAGCGGATTCTGGAAGAAGAATCTGATGAGACACTTAAAATGACT   | 240 |
|                    |     |                                                                |     |
| NS 245625 MiSeq    | 241 | ATTGCCCCCGTGCCAGCTTCACGCTACCTAACTGACATGACTCTTGAGGAGATGTCAAGG   | 300 |
| NS 245626 Method A | 241 | ATTGCCCCCGTGCCAGCTTCACGCTACCTAACTGACATGACTCTTGAGGAGATGTCAAGG   | 300 |
| NS 245626 Method S | 241 | ATTGCCCCCGTGCCAGCTTCACGCTACCTAACTGACATGACTCTTGAGGAGATGTCAAGG   | 300 |
| NS 245626 Method K | 241 | ATTGCCCCCGTGCCAGCTTCACGCTACCTAACTGACATGACTCTTGAGGAGATGTCAAGG   | 300 |
| NS 245626 Method N | 241 | ATTGCCCCCGTGCCAGCTTCACGCTACCTAACTGACATGACTCTTGAGGAGATGTCAAGG   | 300 |

|                    |     |                                                               |     |
|--------------------|-----|---------------------------------------------------------------|-----|
| NS 245625 MiSeq    | 301 | GACTGGTTTCATGCTCATGCCCAAACAGAAAGTGGCAGGTTCCCTTTGCATCAGAATGGAC | 360 |
| NS 245626 Method A | 301 | GACTGGTTTCATGCTCATGCCCAAACAGAAAGTGGCAGGTTCCCTTTGCATCAGAATGGAC | 360 |
| NS 245626 Method S | 301 | GACTGGTTTCATGCTCATGCCCAAACAGAAAGTGGCAGGTTCCCTTTGCATCAGAATGGAC | 360 |
| NS 245626 Method K | 301 | GACTGGTTTCATGCTCATGCCCAAACAGAAAGTGGCAGGTTCCCTTTGCATCAGAATGGAC | 360 |
| NS 245626 Method N | 301 | GACTGGTTTCATGCTCATGCCCAAACAGAAAGTGGCAGGTTCCCTTTGCATCAGAATGGAC | 360 |

|                    |     |                                                                |     |
|--------------------|-----|----------------------------------------------------------------|-----|
| NS 245625 MiSeq    | 361 | CAGGCAATAATGGATAAAAAACATCATATTGAAAGCAAACCTTCAGTGTGATTTTTGACCGG | 420 |
| NS 245626 Method A | 361 | CAGGCAATAATGGATAAAAAACATCATATTGAAAGCAAACCTTCAGTGTGATTTTTGACCGG | 420 |
| NS 245626 Method S | 361 | CAGGCAATAATGGATAAAAAACATCATATTGAAAGCAAACCTTCAGTGTGATTTTTGACCGG | 420 |
| NS 245626 Method K | 361 | CAGGCAATAATGGATAAAAAACATCATATTGAAAGCAAACCTTCAGTGTGATTTTTGACCGG | 420 |
| NS 245626 Method N | 361 | CAGGCAATAATGGATAAAAAACATCATATTGAAAGCAAACCTTCAGTGTGATTTTTGACCGG | 420 |

|                    |     |                                                              |     |
|--------------------|-----|--------------------------------------------------------------|-----|
| NS 245625 MiSeq    | 421 | CTGGAAACCCTAATACTACTTAGAGCTTTCACAGAAGAAGGAGCAATTGTGGGAGAAATC | 480 |
| NS 245626 Method A | 421 | CTGGAAACCCTAATACTACTTAGAGCTTTCACAGAAGAAGGAGCAATTGTGGGAGAAATC | 480 |
| NS 245626 Method S | 421 | CTGGAAACCCTAATACTACTTAGAGCTTTCACAGAAGAAGGAGCAATTGTGGGAGAAATC | 480 |
| NS 245626 Method K | 421 | CTGGAAACCCTAATACTACTTAGAGCTTTCACAGAAGAAGGAGCAATTGTGGGAGAAATC | 480 |
| NS 245626 Method N | 421 | CTGGAAACCCTAATACTACTTAGAGCTTTCACAGAAGAAGGAGCAATTGTGGGAGAAATC | 480 |

|                    |     |                                                               |     |
|--------------------|-----|---------------------------------------------------------------|-----|
| NS 245625 MiSeq    | 481 | TCACCATTACCTTCTCTTCCAGGACATACTGATGAGGATGTCAAAAATGCAATTGGGGTTC | 540 |
| NS 245626 Method A | 481 | TCACCATTACCTTCTCTTCCAGGACATACTGATGAGGATGTCAAAAATGCAATTGGGGTTC | 540 |
| NS 245626 Method S | 481 | TCACCATTACCTTCTCTTCCAGGACATACTGATGAGGATGTCAAAAATGCAATTGGGGTTC | 540 |
| NS 245626 Method K | 481 | TCACCATTACCTTCTCTTCCAGGACATACTGATGAGGATGTCAAAAATGCAATTGGGGTTC | 540 |
| NS 245626 Method N | 481 | TCACCATTACCTTCTCTTCCAGGACATACTGATGAGGATGTCAAAAATGCAATTGGGGTTC | 540 |

|                    |     |                                                              |     |
|--------------------|-----|--------------------------------------------------------------|-----|
| NS 245625 MiSeq    | 541 | CTCATCGGAGGACTTGAATGGAATGATAACACAGTTCGAGTCTCTGAAACTTTACAGAGA | 600 |
| NS 245626 Method A | 541 | CTCATCGGAGGACTTGAATGGAATGATAACACAGTTCGAGTCTCTGAAACTTTACAGAGA | 600 |
| NS 245626 Method S | 541 | CTCATCGGAGGACTTGAATGGAATGATAACACAGTTCGAGTCTCTGAAACTTTACAGAGA | 600 |
| NS 245626 Method K | 541 | CTCATCGGAGGACTTGAATGGAATGATAACACAGTTCGAGTCTCTGAAACTTTACAGAGA | 600 |
| NS 245626 Method N | 541 | CTCATCGGAGGACTTGAATGGAATGATAACACAGTTCGAGTCTCTGAAACTTTACAGAGA | 600 |

|                    |     |                                                              |     |
|--------------------|-----|--------------------------------------------------------------|-----|
| NS 245625 MiSeq    | 601 | TTCGCTTGGAGAAGCAGTAATGAGGATGGGAGACCTCCACTCCCTCCAAAGCAGAAACGG | 660 |
| NS 245626 Method A | 601 | TTCGCTTGGAGAAGCAGTAATGAGGATGGGAGACCTCCACTCCCTCCAAAGCAGAAACGG | 660 |
| NS 245626 Method S | 601 | TTCGCTTGGAGAAGCAGTAATGAGGATGGGAGACCTCCACTCCCTCCAAAGCAGAAACGG | 660 |
| NS 245626 Method K | 601 | TTCGCTTGGAGAAGCAGTAATGAGGATGGGAGACCTCCACTCCCTCCAAAGCAGAAACGG | 660 |
| NS 245626 Method N | 601 | TTCGCTTGGAGAAGCAGTAATGAGGATGGGAGACCTCCACTCCCTCCAAAGCAGAAACGG | 660 |

|                    |     |                                                              |     |
|--------------------|-----|--------------------------------------------------------------|-----|
| NS 245625 MiSeq    | 661 | AAAATGGCGAGAACAATTGAGTCAGAAGTTTGAAGAAATAAGATGGCTGATTGAAGGAGT | 720 |
| NS 245626 Method A | 661 | AAAATGGCGAGAACAATTGAGTCAGAAGTTTGAAGAAATAAGATGGCTGATTGAAGGAGT | 720 |
| NS 245626 Method S | 661 | AAAATGGCGAGAACAATTGAGTCAGAAGTTTGAAGAAATAAGATGGCTGATTGAAGGAGT | 720 |
| NS 245626 Method K | 661 | AAAATGGCGAGAACAATTGAGTCAGAAGTTTGAAGAAATAAGATGGCTGATTGAAGGAGT | 720 |
| NS 245626 Method N | 661 | AAAATGGCGAGAACAATTGAGTCAGAAGTTTGAAGAAATAAGATGGCTGATTGAAGGAGT | 720 |

|                    |     |                                                              |     |
|--------------------|-----|--------------------------------------------------------------|-----|
| NS 245625 MiSeq    | 721 | GCGGCACAGATTGAAGATTACAGAGAACAGTTTCGAACAAATAACTTTTATGCAAGCCTT | 780 |
| NS 245626 Method A | 721 | GCGGCACAGATTGAAGATTACAGAGAACAGTTTCGAACAAATAACTTTTATGCAAGCCTT | 780 |
| NS 245626 Method S | 721 | GCGGCACAGATTGAAGATTACAGAGAACAGTTTCGAACAAATAACTTTTATGCAAGCCTT | 780 |
| NS 245626 Method K | 721 | GCGGCACAGATTGAAGATTACAGAGAACAGTTTCGAACAAATAACTTTTATGCAAGCCTT | 780 |
| NS 245626 Method N | 721 | GCGGCACAGATTGAAGATTACAGAGAACAGTTTCGAACAAATAACTTTTATGCAAGCCTT | 780 |

|                    |     |                                                               |     |
|--------------------|-----|---------------------------------------------------------------|-----|
| NS 245625 MiSeq    | 781 | ACAAC TATTGCTTGAAGTGGAGCAAGAGATAAGA AACTTTCTCGTTTCAGCTTATTTAA | 838 |
| NS 245626 Method A | 781 | ACAAC TATTGCTTGAAGTGGAGCAAGAGATAAGA AACTTTCTCGTTTCAGCTTATTTAA | 838 |
| NS 245626 Method S | 781 | ACAAC TATTGCTTGAAGTGGAGCAAGAGATAAGA AACTTTCTCGTTTCAGCTTATTTAA | 838 |
| NS 245626 Method K | 781 | ACAAC TATTGCTTGAAGTGGAGCAAGAGATAAGA AACTTTCTCGTTTCAGCTTATTTAA | 838 |
| NS 245626 Method N | 781 | ACAAC TATTGCTTGAAGTGGAGCAAGAGATAAGA AACTTTCTCGTTTCAGCTTATTTAA | 838 |
