# Supplementary material for: An Evaluation of Avian Influenza Virus Whole Genome Sequencing Approaches Using Nanopore Technology
Source: Preprints.org preprint supplement (doi:10.20944/preprints202301.0480.v1), 2023-01-26
Supplement: Supplementary file 5 [file supplementary]

## Formatted Alignments

|                    |   |                                                             |    |
|--------------------|---|-------------------------------------------------------------|----|
| H5 245467 MiSeq    | 1 | ATGGAGAACATAGTACTACTTCTTGCAATAGTTAGCCTTGTTAAAAGTGATCAGATTTC | 60 |
| H5 245467 Method A | 1 | ATGGAGAACATAGTACTACTTCTTGCAATAGTTAGCCTTGTTAAAAGTGATCAGATTTC | 60 |
| H5 245467 Method S | 1 | ATGGAGAACATAGTACTTCTTCTTGCAATAGTTAGCCTTGTTAAAAGTGATCAGATTTC | 60 |
| H5 245467 Method E | 1 | ATGGAGAACATAGTACTACTTCTTGCAATAGTTAGCCTTGTTAAAAGTGATCAGATTTC | 60 |
| H5 245467 Method K | 1 | ATGGAGAACATAGTACTACTTCTTGCAATAGTTAGCCTTGTTAAAAGTGATCAGATTTC | 60 |
| H5 245467 Method N | 1 | ATGGAGAACATAGTACTACTTCTTGCAATAGTTAGCCTTGTTAAAAGTGATCAGATTTC | 60 |

|                    |    |                                                              |     |
|--------------------|----|--------------------------------------------------------------|-----|
| H5 245467 MiSeq    | 61 | ATTGGTTACCATGCAAACAATTCGACAGAGCAAGTTGACACGATAATGGAAAAGAATGTT | 120 |
| H5 245467 Method A | 61 | ATTGGTTACCATGCAAACAATTCGACAGAGCAAGTTGACACGATAATGGAAAAGAATGTT | 120 |
| H5 245467 Method S | 61 | ATTGGTTACCATGCAAACAATTCGACAGAGCAAGTTGACACGATAATGGAAAAGAACTC  | 120 |
| H5 245467 Method E | 61 | ATTGGTTACCATGCAAACAATTCGACAGAGCAAGTTGACACGATAATGGAAAAGAATGTT | 120 |
| H5 245467 Method K | 61 | ATTGGTTACCATGCAAACAATTCGACAGAGCAAGTTGACACGATAATGGAAAAGAATGTT | 120 |
| H5 245467 Method N | 61 | ATTGGTTACCATGCAAACAATTCGACAGAGCAAGTTGACACGATAATGGAAAAGAATGTT | 120 |

|                    |     |                                                              |     |
|--------------------|-----|--------------------------------------------------------------|-----|
| H5 245467 MiSeq    | 121 | ACTGTTACACATGCCCAAGACATACTGGAAAAAACACACAACGGGAAGCTCTGTGATCTA | 180 |
| H5 245467 Method A | 121 | ACTGTTACACATGCCCAAGACATACTGGAAAAAACACACAACGGGAAGCTCTGTGATCTA | 180 |
| H5 245467 Method S | 121 | ACTGTTACACATGCCCAAGACATACTGGAAAAAACACACAACGGGAAGCTCTGTGATCTA | 180 |
| H5 245467 Method E | 121 | ACTGTTACACATGCCCAAGACATACTGGAAAAAACACACAACGGGAAGCTCTGTGATCTA | 180 |
| H5 245467 Method K | 121 | ACTGTTACACATGCCCAAGACATACTGGAAAAAACACACAACGGGAAGCTCTGTGATCTA | 180 |
| H5 245467 Method N | 121 | ACTGTTACACATGCCCAAGACATACTGGAAAAAACACACAACGGGAAGCTCTGTGATCTA | 180 |

|                    |     |                                                              |     |
|--------------------|-----|--------------------------------------------------------------|-----|
| H5 245467 MiSeq    | 181 | AATGGGGTGAAGCCTCTGATTTTAAAGGATTGTAGTGTAGCTGGATGGCTCCTCGGAAAC | 240 |
| H5 245467 Method A | 181 | AATGGGGTGAAGCCTCTGATTTTAAAGGATTGTAGTGTAGCTGGATGGCTCCTCGGAAAC | 240 |
| H5 245467 Method S | 181 | AATGGGGTGAAGCCTCTGATTTTAAAGGATTGTAGTGTAGCTGGATGGCTCCTCGGAAAC | 240 |
| H5 245467 Method E | 181 | AATGGGGTGAAGCCTCTGATTTTAAAGGATTGTAGTGTAGCTGGATGGCTCCTCGGAAAC | 240 |
| H5 245467 Method K | 181 | AATGGGGTGAAGCCTCTGATTTTAAAGGATTGTAGTGTAGCTGGATGGCTCCTCGGAAAC | 240 |
| H5 245467 Method N | 181 | AATGGGGTGAAGCCTCTGATTTTAAAGGATTGTAGTGTAGCTGGATGGCTCCTCGGAAAC | 240 |

|                    |     |                                                               |     |
|--------------------|-----|---------------------------------------------------------------|-----|
| H5 245467 MiSeq    | 241 | CCAATGTGCGACGAATTCATCAGAGTGCCTGAATGGTCATACATAGTGGAGCGGGCTAAC  | 300 |
| H5 245467 Method A | 241 | CCAATGTGCGACGAATTCATCAGAGTGCCTGAATGGTCATACATAGTGGAGCGGGCTAAC  | 300 |
| H5 245467 Method S | 241 | CCAATGTGCGACGAATTCATCAGAGTGCCTGAATGGTCATACATAGTGGAGCGGGCTAACT | 300 |
| H5 245467 Method E | 241 | CCAATGTGCGACGAATTCATCAGAGTGCCTGAATGGTCATACATAGTGGAGCGGGCTAAC  | 300 |
| H5 245467 Method K | 241 | CCAATGTGCGACGAATTCATCAGAGTGCCTGAATGGTCATACATAGTGGAGCGGGCTAAC  | 300 |
| H5 245467 Method N | 241 | CCAATGTGCGACGAATTCATCAGAGTGCCTGAATGGTCATACATAGTGGAGCGGGCTAAC  | 300 |

|                    |     |                                                              |     |
|--------------------|-----|--------------------------------------------------------------|-----|
| H5 245467 MiSeq    | 301 | CCAGCTAATGACCTCTGTTACCCAGGGAGCCTCAATGACTATGAAGAACTGAAACACATG | 360 |
| H5 245467 Method A | 301 | CCAGCTAATGACCTCTGTTACCCAGGGAGCCTCAATGACTATGAAGAACTGAAACACATG | 360 |
| H5 245467 Method S | 301 | CCAGCTAATGACCTCTGTTACCCAGGGAGTCTCAATGACTATGAAGAACTGAAACACCTG | 360 |
| H5 245467 Method E | 301 | CCAGCTAATGACCTCTGTTACCCAGGGAGCCTCAATGACTATGAAGAACTGAAACACATG | 360 |
| H5 245467 Method K | 301 | CCAGCTAATGACCTCTGTTACCCAGGGAGCCTCAATGACTATGAAGAACTGAAACACATG | 360 |
| H5 245467 Method N | 301 | CCAGCTAATGACCTCTGTTACCCAGGGAGCCTCAATGACTATGAAGAACTGAAACACATG | 360 |

|                    |     |                                                                |     |
|--------------------|-----|----------------------------------------------------------------|-----|
| H5 245467 MiSeq    | 361 | TTGAGCAGAATAAATCATTTTGTGAGAAGATTCTGATCATCCCCAAGAGTTCCTGGCCAAAT | 420 |
| H5 245467 Method A | 361 | TTGAGCAGAATAAATCATTTTGTGAGAAGATTCTGATCATCCCCAAGAGTTCCTGGCCAAAT | 420 |
| H5 245467 Method S | 361 | TTGAGCAGAATAAATCATTTTGTGAGAAGATTCTGATCATCCCCAAGAGTTCCTGGCCAAAT | 420 |
| H5 245467 Method E | 361 | TTGAGCAGAATAAATCATTTTGTGAGAAGATTCTGATCATCCCCAAGAGTTCCTGGCCAAAT | 420 |
| H5 245467 Method K | 361 | TTGAGCAGAATAAATCATTTTGTGAGAAGATTCTGATCATCCCCAAGAGTTCCTGGCCAAAT | 420 |
| H5 245467 Method N | 361 | TTGAGCAGAATAAATCATTTTGTGAGAAGATTCTGATCATCCCCAAGAGTTCCTGGCCAAAT | 420 |

|                    |     |                                                               |     |
|--------------------|-----|---------------------------------------------------------------|-----|
| H5 245467 MiSeq    | 421 | CATGAAACATCACTAGGGGTGAGCGCAGCTTGTCCATACCAGGGAGCGCCCTCCTTTTTTC | 480 |
| H5 245467 Method A | 421 | CATGAAACATCACTAGGGGTGAGCGCAGCTTGTCCATACCAGGGAGCGCCCTCCTTTTTTC | 480 |
| H5 245467 Method S | 421 | CATGAAACATCACTAGGGGTGAGCGCAGCTTGTCCATACCAGGGAGCGCCCTCCTTTTTTC | 480 |
| H5 245467 Method E | 421 | CATGAAACATCACTAGGGGTGAGCGCAGCTTGTCCATACCAGGGAGCGCCCTCCTTTTTTC | 480 |
| H5 245467 Method K | 421 | CATGAAACATCACTAGGGGTGAGCGCAGCTTGTCCATACCAGGGAGCGCCCTCCTTTTTTC | 480 |
| H5 245467 Method N | 421 | CATGAAACATCACTAGGGGTGAGCGCAGCTTGTCCATACCAGGGAGCGCCCTCCTTTTTTC | 480 |

|                    |     |                                                              |     |
|--------------------|-----|--------------------------------------------------------------|-----|
| H5 245467 MiSeq    | 481 | AGAAATGTGGTGTGGCTTATCAAAAAGAACGATGCATACCCAACAATAAAGATAAGCTAC | 540 |
| H5 245467 Method A | 481 | AGAAATGTGGTGTGGCTTATCAAAAAGAACGATGCATACCCAACAATAAAGATAAGCTAC | 540 |
| H5 245467 Method S | 481 | AGAAATGTGGTGTGGCTTATCAAAAAGAACGATGCATACCCAACAATAAAGATAAGCTAC | 540 |
| H5 245467 Method E | 481 | AGAAATGTGGTGTGGCTTATCAAAAAGAACGATGCATACCCAACAATAAAGATAAGCTAC | 540 |
| H5 245467 Method K | 481 | AGAAATGTGGTGTGGCTTATCAAAAAGAACGATGCATACCCAACAATAAAGATAAGCTAC | 540 |
| H5 245467 Method N | 481 | AGAAATGTGGTGTGGCTTATCAAAAAGAACGATGCATACCCAACAATAAAGATAAGCTAC | 540 |

|                    |     |                                                                         |     |
|--------------------|-----|-------------------------------------------------------------------------|-----|
| H5 245467 MiSeq    | 541 | AATAATACCAATCGGGAAGATCTCTTGATACTGTGGGGGATTTCATCATTCCAACAATGCA           | 600 |
| H5 245467 Method A | 541 | AATAATACCAATCGGGAAGATCTCTTGATACTGTGGGGGATTTCATCATTCCAACAATGCA           | 600 |
| H5 245467 Method S | 541 | AATAATACCAATC <b>A</b> GGGAAGATCTCTTGATACTGTGGGGGATTTCATCATTCCAACAATGCA | 600 |
| H5 245467 Method E | 541 | AATAATACCAATCGGGAAGATCTCTTGATACTGTGGGGGATTTCATCATTCCAACAATGCA           | 600 |
| H5 245467 Method K | 541 | AATAATACCAATCGGGAAGATCTCTTGATACTGTGGGGGATTTCATCATTCCAACAATGCA           | 600 |
| H5 245467 Method N | 541 | AATAATACCAATCGGGAAGATCTCTTGATACTGTGGGGGATTTCATCATTCCAACAATGCA           | 600 |

|                    |     |                                                                        |     |
|--------------------|-----|------------------------------------------------------------------------|-----|
| H5 245467 MiSeq    | 601 | GAAGAGCAGACAAATCTCTACAAAAACCCAACCACCTACATTTTCAGTTGGAACATCAACT          | 660 |
| H5 245467 Method A | 601 | GAAGAGCAGACAAATCTCTACAAAAACCCAACCACCTACATTTTCAGTTGGAACATCAACT          | 660 |
| H5 245467 Method S | 601 | GAAGAGCAGACAAATCTCTA <b>T</b> AAAAACCCAACCACCTACATTTTCAGTTGGAACATCAACT | 660 |
| H5 245467 Method E | 601 | GAAGAGCAGACAAATCTCTACAAAAACCCAACCACCTACATTTTCAGTTGGAACATCAACT          | 660 |
| H5 245467 Method K | 601 | GAAGAGCAGACAAATCTCTACAAAAACCCAACCACCTACATTTTCAGTTGGAACATCAACT          | 660 |
| H5 245467 Method N | 601 | GAAGAGCAGACAAATCTCTACAAAAACCCAACCACCTACATTTTCAGTTGGAACATCAACT          | 660 |

|                    |     |                                                                        |     |
|--------------------|-----|------------------------------------------------------------------------|-----|
| H5 245467 MiSeq    | 661 | TTAAACCAGAGGTTGGCACCAAAAATAGCTACTAGATCCCAAGTAAACGGGGCAACGTGGA          | 720 |
| H5 245467 Method A | 661 | TTAAACCAGAGGTTGGCACCAAAAATAGCTACTAGATCCCAAGTAAACGGGGCAACGTGGA          | 720 |
| H5 245467 Method S | 661 | TTAAACCAGAGGTTGG <b>T</b> ACCAAAAATAGCTACTAGATCCCAAGTAAACGGGGCAACGTGGA | 720 |
| H5 245467 Method E | 661 | TTAAACCAGAGGTTGGCACCAAAAATAGCTACTAGATCCCAAGTAAACGGGGCAACGTGGA          | 720 |
| H5 245467 Method K | 661 | TTAAACCAGAGGTTGGCACCAAAAATAGCTACTAGATCCCAAGTAAACGGGGCAACGTGGA          | 720 |
| H5 245467 Method N | 661 | TTAAACCAGAGGTTGGCACCAAAAATAGCTACTAGATCCCAAGTAAACGGGGCAACGTGGA          | 720 |

|                    |     |                                                                                 |     |
|--------------------|-----|---------------------------------------------------------------------------------|-----|
| H5 245467 MiSeq    | 721 | AGAATGGACTTCTTCTGGACAATCTTAAAACCAGATGATGCAATCCATTTTCGAGAGTAAT                   | 780 |
| H5 245467 Method A | 721 | AGAATGGACTTCTTCTGGACAATCTTAAAACCAGATGATGCAATCCATTTTCGAGAGTAAT                   | 780 |
| H5 245467 Method S | 721 | AGAATGGACTTCTTCTGGACAAT <b>T</b> TTAAAACC <b>G</b> GATGATGCAATCCATTTTCGAGAGTAAT | 780 |
| H5 245467 Method E | 721 | AGAATGGACTTCTTCTGGACAATCTTAAAACCAGATGATGCAATCCATTTTCGAGAGTAAT                   | 780 |
| H5 245467 Method K | 721 | AGAATGGACTTCTTCTGGACAATCTTAAAACCAGATGATGCAATCCATTTTCGAGAGTAAT                   | 780 |
| H5 245467 Method N | 721 | AGAATGGACTTCTTCTGGACAATCTTAAAACCAGATGATGCAATCCATTTTCGAGAGTAAT                   | 780 |

|                    |     |                                                               |     |
|--------------------|-----|---------------------------------------------------------------|-----|
| H5 245467 MiSeq    | 781 | GGAAATTTTCATTGCTCCAGAATATGCATACAAAATTGTCAAGAAAGGGGACTCAACAATT | 840 |
| H5 245467 Method A | 781 | GGAAATTTTCATTGCTCCAGAATATGCATACAAAATTGTCAAGAAAGGGGACTCAACAATT | 840 |
| H5 245467 Method S | 781 | GGAAATTTTCATTGCTCCAGAATATGCATACAAAATTGTCAAGAAAGGGGACTCAACAATT | 840 |
| H5 245467 Method E | 781 | GGAAATTTTCATTGCTCCAGAATATGCATACAAAATTGTCAAGAAAGGGGACTCAACAATT | 840 |
| H5 245467 Method K | 781 | GGAAATTTTCATTGCTCCAGAATATGCATACAAAATTGTCAAGAAAGGGGACTCAACAATT | 840 |
| H5 245467 Method N | 781 | GGAAATTTTCATTGCTCCAGAATATGCATACAAAATTGTCAAGAAAGGGGACTCAACAATT | 840 |

|                    |     |                                                                       |     |
|--------------------|-----|-----------------------------------------------------------------------|-----|
| H5 245467 MiSeq    | 841 | ATGAAAAGTGGAGTGGAATATGGCCACTGCAACACCAAATGTCAAACCCCAGTAGGTGCG          | 900 |
| H5 245467 Method A | 841 | ATGAAAAGTGGAGTGGAATATGGCCACTGCAACACCAAATGTCAAACCCCAGTAGGTGCG          | 900 |
| H5 245467 Method S | 841 | ATGAAAAGTGGAGTGGAATATGGCCACTGCAACACCAAATGTCAAACCCCAGTAGG <b>A</b> GCG | 900 |
| H5 245467 Method E | 841 | ATGAAAAGTGGAGTGGAATATGGCCACTGCAACACCAAATGTCAAACCCCAGTAGGTGCG          | 900 |
| H5 245467 Method K | 841 | ATGAAAAGTGGAGTGGAATATGGCCACTGCAACACCAAATGTCAAACCCCAGTAGGTGCG          | 900 |
| H5 245467 Method N | 841 | ATGAAAAGTGGAGTGGAATATGGCCACTGCAACACCAAATGTCAAACCCCAGTAGGTGCG          | 900 |

|                    |     |                                                              |     |
|--------------------|-----|--------------------------------------------------------------|-----|
| H5 245467 MiSeq    | 901 | ATAAATTCTAGTATGCCATTCCACAACATACATCCTCTCACCATTGGGGAATGCCCCAAA | 960 |
| H5 245467 Method A | 901 | ATAAATTCTAGTATGCCATTCCACAACATACATCCTCTCACCATTGGGGAATGCCCCAAA | 960 |
| H5 245467 Method S | 901 | ATAAATTCTAGTATGCCATTCCACAACATACATCCTCTCACCATTGGGGAATGCCCCAAA | 960 |
| H5 245467 Method E | 901 | ATAAATTCTAGTATGCCATTCCACAACATACATCCTCTCACCATTGGGGAATGCCCCAAA | 960 |
| H5 245467 Method K | 901 | ATAAATTCTAGTATGCCATTCCACAACATACATCCTCTCACCATTGGGGAATGCCCCAAA | 960 |
| H5 245467 Method N | 901 | ATAAATTCTAGTATGCCATTCCACAACATACATCCTCTCACCATTGGGGAATGCCCCAAA | 960 |

|                           |     |                                                              |      |
|---------------------------|-----|--------------------------------------------------------------|------|
| <b>H5 245467 MiSeq</b>    | 961 | TACGTGAAGTCAAACAAGTTGGTCCTTGCGACTGGGCTCAGAAATAGTCCTCTAAGAGAA | 1020 |
| <b>H5 245467 Method A</b> | 961 | TACGTGAAGTCAAACAAGTTGGTCCTTGCGACTGGGCTCAGAAATAGTCCTCTAAGAGAA | 1020 |
| <b>H5 245467 Method S</b> | 961 | TACGTGAAGTCAAACAAGTTGGTCCTTGCGACTGGGCTCAGAAATAGTCCTCTAAGAGAA | 1020 |
| <b>H5 245467 Method E</b> | 961 | TACGTGAAGTCAAACAAGTTGGTCCTTGCGACTGGGCTCAGAAATAGTCCTCTAAGAGAA | 1020 |
| <b>H5 245467 Method K</b> | 961 | TACGTGAAGTCAAACAAGTTGGTCCTTGCGACTGGGCTCAGAAATAGTCCTCTAAGAGAA | 1020 |
| <b>H5 245467 Method N</b> | 961 | TACGTGAAGTCAAACAAGTTGGTCCTTGCGACTGGGCTCAGAAATAGTCCTCTAAGAGAA | 1020 |

|                           |      |                                                              |      |
|---------------------------|------|--------------------------------------------------------------|------|
| <b>H5 245467 MiSeq</b>    | 1021 | AAGAGAAGAAAAAGAGGCCTGTTTGGGGCGATAGCAGGGTTTATAGAGGGAGGATGGCAG | 1080 |
| <b>H5 245467 Method A</b> | 1021 | AAGAGAAGAAAAAGAGGCCTGTTTGGGGCGATAGCAGGGTTTATAGAGGGAGGATGGCAG | 1080 |
| <b>H5 245467 Method S</b> | 1021 | AAGAGAAGAAAAAGAGGCCTGTTTGGGGCGATAGCAGGGTTTATAGAGGGAGGATGGCAG | 1080 |
| <b>H5 245467 Method E</b> | 1021 | AAGAGAAGAAAAAGAGGCCTGTTTGGGGCGATAGCAGGGTTTATAGAGGGAGGATGGCAG | 1080 |
| <b>H5 245467 Method K</b> | 1021 | AAGAGAAGAAAAAGAGGCCTGTTTGGGGCGATAGCAGGGTTTATAGAGGGAGGATGGCAG | 1080 |
| <b>H5 245467 Method N</b> | 1021 | AAGAGAAGAAAAAGAGGCCTGTTTGGGGCGATAGCAGGGTTTATAGAGGGAGGATGGCAG | 1080 |

|                           |      |                                                              |      |
|---------------------------|------|--------------------------------------------------------------|------|
| <b>H5 245467 MiSeq</b>    | 1081 | GGAATGGTTGATGGTTGGTATGGGTACCATCATAGCAATGAGCAGGGGAGTGGGTACGCT | 1140 |
| <b>H5 245467 Method A</b> | 1081 | GGAATGGTTGATGGTTGGTATGGGTACCATCATAGCAATGAGCAGGGGAGTGGGTACGCT | 1140 |
| <b>H5 245467 Method S</b> | 1081 | GGAATGGTTGATGGTTGGTATGGGTACCATCATAGCAATGAGCAGGGGAGTGGGTACGCT | 1140 |
| <b>H5 245467 Method E</b> | 1081 | GGAATGGTTGATGGTTGGTATGGGTACCATCATAGCAATGAGCAGGGGAGTGGGTACGCT | 1140 |
| <b>H5 245467 Method K</b> | 1081 | GGAATGGTTGATGGTTGGTATGGGTACCATCATAGCAATGAGCAGGGGAGTGGGTACGCT | 1140 |
| <b>H5 245467 Method N</b> | 1081 | GGAATGGTTGATGGTTGGTATGGGTACCATCATAGCAATGAGCAGGGGAGTGGGTACGCT | 1140 |

|                           |      |                                                                  |      |
|---------------------------|------|------------------------------------------------------------------|------|
| <b>H5 245467 MiSeq</b>    | 1141 | GCGGACAAAGAATCCACCCAAAAGGCAATAGATGGAGTTACCAATAAGGTCAACTCAATT     | 1200 |
| <b>H5 245467 Method A</b> | 1141 | GCGGACAAAGAATCCACCCAAAAGGCAATAGATGGAGTTACCAATAAGGTCAACTCAATT     | 1200 |
| <b>H5 245467 Method S</b> | 1141 | GC[A]GACAAAGAATCCACCCAAAAGGCAATAGATGGAGTTACCAATAAGGTCAACTCAAT[C] | 1200 |
| <b>H5 245467 Method E</b> | 1141 | GCGGACAAAGAATCCACCCAAAAGGCAATAGATGGAGTTACCAATAAGGTCAACTCAATT     | 1200 |
| <b>H5 245467 Method K</b> | 1141 | GCGGACAAAGAATCCACCCAAAAGGCAATAGATGGAGTTACCAATAAGGTCAACTCAATT     | 1200 |
| <b>H5 245467 Method N</b> | 1141 | GCGGACAAAGAATCCACCCAAAAGGCAATAGATGGAGTTACCAATAAGGTCAACTCAATT     | 1200 |

|                           |      |                                                               |      |
|---------------------------|------|---------------------------------------------------------------|------|
| <b>H5 245467 MiSeq</b>    | 1201 | ATTGACAAAATGAACACTCAATTTGAGGCAGTTGGAAGGGAGTTTAAATAACTTAGAAAGG | 1260 |
| <b>H5 245467 Method A</b> | 1201 | ATTGACAAAATGAACACTCAATTTGAGGCAGTTGGAAGGGAGTTTAAATAACTTAGAAAGG | 1260 |
| <b>H5 245467 Method S</b> | 1201 | ATTGACAAAATGAACACTCAATTTGAGGCAGTTGGAAGGGAGTTTAAATAACTTAGAAAGG | 1260 |
| <b>H5 245467 Method E</b> | 1201 | ATTGACAAAATGAACACTCAATTTGAGGCAGTTGGAAGGGAGTTTAAATAACTTAGAAAGG | 1260 |
| <b>H5 245467 Method K</b> | 1201 | ATTGACAAAATGAACACTCAATTTGAGGCAGTTGGAAGGGAGTTTAAATAACTTAGAAAGG | 1260 |
| <b>H5 245467 Method N</b> | 1201 | ATTGACAAAATGAACACTCAATTTGAGGCAGTTGGAAGGGAGTTTAAATAACTTAGAAAGG | 1260 |

|                           |      |                                                               |      |
|---------------------------|------|---------------------------------------------------------------|------|
| <b>H5 245467 MiSeq</b>    | 1261 | AGGATAGAGAATTTGAACAAGAAAATGGAAGACGGATTCCCTAGATGTCTGGACCTATAAT | 1320 |
| <b>H5 245467 Method A</b> | 1261 | AGGATAGAGAATTTGAACAAGAAAATGGAAGACGGATTCCCTAGATGTCTGGACCTATAAT | 1320 |
| <b>H5 245467 Method S</b> | 1261 | AGGATAGAGAATTTGAACAAGAAAATGGAAGACGGATTCCCTAGATGTCTGGACCTATAAT | 1320 |
| <b>H5 245467 Method E</b> | 1261 | AGGATAGAGAATTTGAACAAGAAAATGGAAGACGGATTCCCTAGATGTCTGGACCTATAAT | 1320 |
| <b>H5 245467 Method K</b> | 1261 | AGGATAGAGAATTTGAACAAGAAAATGGAAGACGGATTCCCTAGATGTCTGGACCTATAAT | 1320 |
| <b>H5 245467 Method N</b> | 1261 | AGGATAGAGAATTTGAACAAGAAAATGGAAGACGGATTCCCTAGATGTCTGGACCTATAAT | 1320 |

|                           |      |                                                              |      |
|---------------------------|------|--------------------------------------------------------------|------|
| <b>H5 245467 MiSeq</b>    | 1321 | GCTGAACTTCTAGTTCTCATGGAAAACGAGAGGACTCTAGATTTCCATGATTCAAATGTC | 1380 |
| <b>H5 245467 Method A</b> | 1321 | GCTGAACTTCTAGTTCTCATGGAAAACGAGAGGACTCTAGATTTCCATGATTCAAATGTC | 1380 |
| <b>H5 245467 Method S</b> | 1321 | GCTGAACTTCTAGTTCTCATGGAAAACGAGAGGACTCTAGATTTCCATGATTCAAATGTC | 1380 |
| <b>H5 245467 Method E</b> | 1321 | GCTGAACTTCTAGTTCTCATGGAAAACGAGAGGACTCTAGATTTCCATGATTCAAATGTC | 1380 |
| <b>H5 245467 Method K</b> | 1321 | GCTGAACTTCTAGTTCTCATGGAAAACGAGAGGACTCTAGATTTCCATGATTCAAATGTC | 1380 |
| <b>H5 245467 Method N</b> | 1321 | GCTGAACTTCTAGTTCTCATGGAAAACGAGAGGACTCTAGATTTCCATGATTCAAATGTC | 1380 |

|                           |      |                                                               |      |
|---------------------------|------|---------------------------------------------------------------|------|
| <b>H5 245467 MiSeq</b>    | 1381 | AAGAACCTTTACGACAAAGTCAGATTACAGCTTAGGGATAATGCAAAGGAGCTGGGTAAAC | 1440 |
| <b>H5 245467 Method A</b> | 1381 | AAGAACCTTTACGACAAAGTCAGATTACAGCTTAGGGATAATGCAAAGGAGCTGGGTAAAC | 1440 |
| <b>H5 245467 Method S</b> | 1381 | AAGAACCTTTACGACAAAGTCAGATCAGCTTAGGGATAATGCAAAGGAGCTGGGTAAAC   | 1440 |
| <b>H5 245467 Method E</b> | 1381 | AAGAACCTTTACGACAAAGTCAGATTACAGCTTAGGGATAATGCAAAGGAGCTGGGTAAAC | 1440 |
| <b>H5 245467 Method K</b> | 1381 | AAGAACCTTTACGACAAAGTCAGATTACAGCTTAGGGATAATGCAAAGGAGCTGGGTAAAC | 1440 |
| <b>H5 245467 Method N</b> | 1381 | AAGAACCTTTACGACAAAGTCAGATTACAGCTTAGGGATAATGCAAAGGAGCTGGGTAAAC | 1440 |

|                    |      |                                                                       |      |
|--------------------|------|-----------------------------------------------------------------------|------|
| H5 245467 MiSeq    | 1441 | GGCTGTTTCGAATTCTATCACAAATGTGATAATGAATGTATGGAAAGTGTGAGAAATGGG          | 1500 |
| H5 245467 Method A | 1441 | GGCTGTTTCGAATTCTATCACAAATGTGATAATGAATGTATGGAAAGTGTGAGAAATGGG          | 1500 |
| H5 245467 Method S | 1441 | GGCTGTTTCGAATTCTATCACAAATG <b>C</b> GATAATGAATGTATGGAAAGTGTGAGAAATGGG | 1500 |
| H5 245467 Method E | 1441 | GGCTGTTTCGAATTCTATCACAAATGTGATAATGAATGTATGGAAAGTGTGAGAAATGGG          | 1500 |
| H5 245467 Method K | 1441 | GGCTGTTTCGAATTCTATCACAAATGTGATAATGAATGTATGGAAAGTGTGAGAAATGGG          | 1500 |
| H5 245467 Method N | 1441 | GGCTGTTTCGAATTCTATCACAAATGTGATAATGAATGTATGGAAAGTGTGAGAAATGGG          | 1500 |

|                    |      |                                                                       |      |
|--------------------|------|-----------------------------------------------------------------------|------|
| H5 245467 MiSeq    | 1501 | ACATATGACTACCCTCAGTATTCAGAAGAAGCAAGATTAAAAAGAGAAGAAATAAGCGGA          | 1560 |
| H5 245467 Method A | 1501 | ACATATGACTACCCTCAGTATTCAGAAGAAGCAAGATTAAAAAGAGAAGAAATAAGCGGA          | 1560 |
| H5 245467 Method S | 1501 | AC <b>C</b> TATGACTACCCTCAGTATTCAGAAGAAGCAAGATTAAAAAGAGAAGAAATAAGCGGA | 1560 |
| H5 245467 Method E | 1501 | ACATATGACTACCCTCAGTATTCAGAAGAAGCAAGATTAAAAAGAGAAGAAATAAGCGGA          | 1560 |
| H5 245467 Method K | 1501 | ACATATGACTACCCTCAGTATTCAGAAGAAGCAAGATTAAAAAGAGAAGAAATAAGCGGA          | 1560 |
| H5 245467 Method N | 1501 | ACATATGACTACCCTCAGTATTCAGAAGAAGCAAGATTAAAAAGAGAAGAAATAAGCGGA          | 1560 |

|                    |      |                                                                                |      |
|--------------------|------|--------------------------------------------------------------------------------|------|
| H5 245467 MiSeq    | 1561 | GTGAAATTAGAATCAGTAGGAACTTACCAGATACTGTCAATTTATTCAACAGCGGCAAGT                   | 1620 |
| H5 245467 Method A | 1561 | GTGAAATTAGAATCAGTAGGAACTTACCAGATACTGTCAATTTATTCAACAGCGGCAAGT                   | 1620 |
| H5 245467 Method S | 1561 | GTGAAATTAGAATCA <b>A</b> TAGGAACTTACCAGATACTGTCAATTTATTCAACAGCGGC <b>C</b> AGT | 1620 |
| H5 245467 Method E | 1561 | GTGAAATTAGAATCAGTAGGAACTTACCAGATACTGTCAATTTATTCAACAGCGGCAAGT                   | 1620 |
| H5 245467 Method K | 1561 | GTGAAATTAGAATCAGTAGGAACTTACCAGATACTGTCAATTTATTCAACAGCGGCAAGT                   | 1620 |
| H5 245467 Method N | 1561 | GTGAAATTAGAATCAGTAGGAACTTACCAGATACTGTCAATTTATTCAACAGCGGCAAGT                   | 1620 |

|                    |      |                                                              |      |
|--------------------|------|--------------------------------------------------------------|------|
| H5 245467 MiSeq    | 1621 | TCCCTAGCACTGGCAATCATGATGGCTGGTCTATCTTTATGGATGTGCTCCAATGGGTCG | 1680 |
| H5 245467 Method A | 1621 | TCCCTAGCACTGGCAATCATGATGGCTGGTCTATCTTTATGGATGTGCTCCAATGGGTCG | 1680 |
| H5 245467 Method S | 1621 | TCCCTAGCACTGGCAATCATGATGGCTGGTCTATCTTTATGGATGTGCTCCAATGGGTCG | 1680 |
| H5 245467 Method E | 1621 | TCCCTAGCACTGGCAATCATGATGGCTGGTCTATCTTTATGGATGTGCTCCAATGGGTCG | 1680 |
| H5 245467 Method K | 1621 | TCCCTAGCACTGGCAATCATGATGGCTGGTCTATCTTTATGGATGTGCTCCAATGGGTCG | 1680 |
| H5 245467 Method N | 1621 | TCCCTAGCACTGGCAATCATGATGGCTGGTCTATCTTTATGGATGTGCTCCAATGGGTCG | 1680 |

|                           |      |                           |      |
|---------------------------|------|---------------------------|------|
| <b>H5 245467 MiSeq</b>    | 1681 | TTACAGTGCAGAAATTTGCATTTAG | 1704 |
| <b>H5 245467 Method A</b> | 1681 | TTACAGTGCAGAAATTTGCATTTAG | 1704 |
| <b>H5 245467 Method S</b> | 1681 | TTACAGTGCAGAAATTTGCATTTA  | 1704 |
| <b>H5 245467 Method E</b> | 1681 | TTACAGTGCAGAAATTTGCATTTAG | 1704 |
| <b>H5 245467 Method K</b> | 1681 | TTACAGTGCAGAAATTTGCATTTAG | 1704 |
| <b>H5 245467 Method N</b> | 1681 | TTACAGTGCAGAAATTTGCATTTAG | 1704 |
