# Supplementary material for: An Evaluation of Avian Influenza Virus Whole Genome Sequencing Approaches Using Nanopore Technology
Source: Preprints.org preprint supplement (doi:10.20944/preprints202301.0480.v1), 2023-01-26
Supplement: Supplementary file 10 [file supplementary]

## Formatted Alignments

|                     |     |                                                               |     |
|---------------------|-----|---------------------------------------------------------------|-----|
| PB1 245467 MiSeq    | 1   | ATGGATGTCAATCCGACTTTACTCTTCTTGAAAGTTCCAGCGCAAAATGCCATAAGCACC  | 60  |
| PB1 245467 Method A | 1   | ATGGATGTCAATCCGACTTTACTCTTCTTGAAAGTTCCAGCGCAAAATGCCATAAGCACC  | 60  |
| PB1 245467 Method S | 1   | ATGGATGTCAATCCGACTTTACTCTTCTTGAAAGTTCCAGCGCAAAATGCCATAAGCACC  | 60  |
| PB1 245467 Method E | 1   | ATGGATGTCAATCCGACTTTACTCTTCTTGAAAGTTCCAGCGCAAAATGCCATAAGCACC  | 60  |
| PB1 245467 Method K | 1   | ATGGATGTCAATCCGACTTTACTCTTCTTGAAAGTTCCAGCGCAAAATGCCATAAGCACC  | 60  |
| PB1 245467 Method N | 1   | ATGGATGTCAATCCGACTTTACTCTTCTTGAAAGTTCCAGCGCAAAATGCCATAAGCACC  | 60  |
|                     |     |                                                               |     |
| PB1 245467 MiSeq    | 61  | ACATTCCCGTATACTGGAGATCCTCCATACAGCCATGGAACAGGAACAGGATATAACCATG | 120 |
| PB1 245467 Method A | 61  | ACATTCCCGTATACTGGAGATCCTCCATACAGCCATGGAACAGGAACAGGATATAACCATG | 120 |
| PB1 245467 Method S | 61  | ACATTCCCGTATACTGGAGATCCTCCATACAGCCATGGAACAGGAACAGGATATAACCATG | 120 |
| PB1 245467 Method E | 61  | ACATTCCCGTATACTGGAGATCCTCCATACAGCCATGGAACAGGAACAGGATATAACCATG | 120 |
| PB1 245467 Method K | 61  | ACATTCCCGTATACTGGAGATCCTCCATACAGCCATGGAACAGGAACAGGATATAACCATG | 120 |
| PB1 245467 Method N | 61  | ACATTCCCGTATACTGGAGATCCTCCATACAGCCATGGAACAGGAACAGGATATAACCATG | 120 |
|                     |     |                                                               |     |
| PB1 245467 MiSeq    | 121 | GACACAGTTAACAGAACACATCAATATTCAGAAAAAGGGAAATGGACAACAAACTCAGAA  | 180 |
| PB1 245467 Method A | 121 | GACACAGTTAACAGAACACATCAATATTCAGAAAAAGGGAAATGGACAACAAACTCAGAA  | 180 |
| PB1 245467 Method S | 121 | GACACAGTTAACAGAACACATCAATATTCAGAAAAAGGGAAATGGACAACAAACTCAGAA  | 180 |
| PB1 245467 Method E | 121 | GACACAGTTAACAGAACACATCAATATTCAGAAAAAGGGAAATGGACAACAAACTCAGAA  | 180 |
| PB1 245467 Method K | 121 | GACACAGTTAACAGAACACATCAATATTCAGAAAAAGGGAAATGGACAACAAACTCAGAA  | 180 |
| PB1 245467 Method N | 121 | GACACAGTTAACAGAACACATCAATATTCAGAAAAAGGGAAATGGACAACAAACTCAGAA  | 180 |
|                     |     |                                                               |     |
| PB1 245467 MiSeq    | 181 | ACTGGAGCACCTCAACTCAATCCAATTGATGGACCTTTGCCTGAGGACAATGAGCCAAGT  | 240 |
| PB1 245467 Method A | 181 | ACTGGAGCACCTCAACTCAATCCAATTGATGGACCTTTGCCTGAGGACAATGAGCCAAGT  | 240 |
| PB1 245467 Method S | 181 | ACTGGAGCACCTCAACTCAATCCAATTGATGGACCTTTGCCTGAGGACAATGAGCCAAGT  | 240 |
| PB1 245467 Method E | 181 | ACTGGAGCACCTCAACTCAATCCAATTGATGGACCTTTGCCTGAGGACAATGAGCCAAGT  | 240 |
| PB1 245467 Method K | 181 | ACTGGAGCACCTCAACTCAATCCAATTGATGGACCTTTGCCTGAGGACAATGAGCCAAGT  | 240 |
| PB1 245467 Method N | 181 | ACTGGAGCACCTCAACTCAATCCAATTGATGGACCTTTGCCTGAGGACAATGAGCCAAGT  | 240 |

|                     |     |                                                                       |     |
|---------------------|-----|-----------------------------------------------------------------------|-----|
| PB1 245467 MiSeq    | 241 | GGATATGCACAAACGGACTGTGTCCTTGAAGCAATGGCTTTCCTTGAAGAGTCCCACCCA          | 300 |
| PB1 245467 Method A | 241 | GGATATGCACAAACGGACTGTGTCCTTGAAGCAATGGCTTTCCTTGAAGAGTCCCACCCA          | 300 |
| PB1 245467 Method S | 241 | GGATATGCACAAACGGACTG <b>C</b> GTCCTTGAAGCAATGGCTTTCCTTGAAGAGTCCCACCCA | 300 |
| PB1 245467 Method E | 241 | GGATATGCACAAACGGACTGTGTCCTTGAAGCAATGGCTTTCCTTGAAGAGTCCCACCCA          | 300 |
| PB1 245467 Method K | 241 | GGATATGCACAAACGGACTGTGTCCTTGAAGCAATGGCTTTCCTTGAAGAGTCCCACCCA          | 300 |
| PB1 245467 Method N | 241 | GGATATGCACAAACGGACTGTGTCCTTGAAGCAATGGCTTTCCTTGAAGAGTCCCACCCA          | 300 |

|                     |     |                                                                        |     |
|---------------------|-----|------------------------------------------------------------------------|-----|
| PB1 245467 MiSeq    | 301 | GGAATCTTTGAAAACCTCGTGTCTTGAACAATGGAAGTTGTTCAACAAACAAGAGTGGAC           | 360 |
| PB1 245467 Method A | 301 | GGAATCTTTGAAAACCTCGTGTCTTGAACAATGGAAGTTGTTCAACAAACAAGAGTGGAC           | 360 |
| PB1 245467 Method S | 301 | GGAATCTTTGAAAACCTCGTGTCTTGAACA <b>G</b> ATGGAAGTTGTTCAACAAACAAGAGTGGAC | 360 |
| PB1 245467 Method E | 301 | GGAATCTTTGAAAACCTCGTGTCTTGAACAATGGAAGTTGTTCAACAAACAAGAGTGGAC           | 360 |
| PB1 245467 Method K | 301 | GGAATCTTTGAAAACCTCGTGTCTTGAACAATGGAAGTTGTTCAACAAACAAGAGTGGAC           | 360 |
| PB1 245467 Method N | 301 | GGAATCTTTGAAAACCTCGTGTCTTGAACAATGGAAGTTGTTCAACAAACAAGAGTGGAC           | 360 |

|                     |     |                                                                       |     |
|---------------------|-----|-----------------------------------------------------------------------|-----|
| PB1 245467 MiSeq    | 361 | AAGTTGACCCAAGGCCGTCAGACTTATGATTGGACATTAAACAGAAATCAGCCGGCTGCA          | 420 |
| PB1 245467 Method A | 361 | AAGTTGACCCAAGGCCGTCAGACTTATGATTGGACATTAAACAGAAATCAGCCGGCTGCA          | 420 |
| PB1 245467 Method S | 361 | AA <b>A</b> TTGACCCAAGGCCGTCAGACTTATGATTGGACATTAAACAGAAATCAGCCGGCTGCA | 420 |
| PB1 245467 Method E | 361 | AAGTTGACCCAAGGCCGTCAGACTTATGATTGGACATTAAACAGAAATCAGCCGGCTGCA          | 420 |
| PB1 245467 Method K | 361 | AAGTTGACCCAAGGCCGTCAGACTTATGATTGGACATTAAACAGAAATCAGCCGGCTGCA          | 420 |
| PB1 245467 Method N | 361 | AAGTTGACCCAAGGCCGTCAGACTTATGATTGGACATTAAACAGAAATCAGCCGGCTGCA          | 420 |

|                     |     |                                                              |     |
|---------------------|-----|--------------------------------------------------------------|-----|
| PB1 245467 MiSeq    | 421 | ACTGCATTAGCTAATACTATAGAGGTCTTCAGATCGAACGGTCTTACAGCTAATGAATCA | 480 |
| PB1 245467 Method A | 421 | ACTGCATTAGCTAATACTATAGAGGTCTTCAGATCGAACGGTCTTACAGCTAATGAATCA | 480 |
| PB1 245467 Method S | 421 | ACTGCATTAGCTAATACTATAGAGGTCTTCAGATCGAACGGTCTTACAGCTAATGAATCA | 480 |
| PB1 245467 Method E | 421 | ACTGCATTAGCTAATACTATAGAGGTCTTCAGATCGAACGGTCTTACAGCTAATGAATCA | 480 |
| PB1 245467 Method K | 421 | ACTGCATTAGCTAATACTATAGAGGTCTTCAGATCGAACGGTCTTACAGCTAATGAATCA | 480 |
| PB1 245467 Method N | 421 | ACTGCATTAGCTAATACTATAGAGGTCTTCAGATCGAACGGTCTTACAGCTAATGAATCA | 480 |

|                     |     |                                                                        |     |
|---------------------|-----|------------------------------------------------------------------------|-----|
| PB1 245467 MiSeq    | 481 | GGAAGGCTAATTGATTTTCTCAAGGATGTGATGGAATCAATGGATAAAGAGGAAATAGAA           | 540 |
| PB1 245467 Method A | 481 | GGAAGGCTAATTGATTTTCTCAAGGATGTGATGGAATCAATGGATAAAGAGGAAATAGAA           | 540 |
| PB1 245467 Method S | 481 | GGAAGGCTAATT <b>A</b> GATTTTCTCAAGGATGTGATGGAATCAATGGATAAAGAGGAAATAGAA | 540 |
| PB1 245467 Method E | 481 | GGAAGGCTAATTGATTTTCTCAAGGATGTGATGGAATCAATGGATAAAGAGGAAATAGAA           | 540 |
| PB1 245467 Method K | 481 | GGAAGGCTAATTGATTTTCTCAAGGATGTGATGGAATCAATGGATAAAGAGGAAATAGAA           | 540 |
| PB1 245467 Method N | 481 | GGAAGGCTAATTGATTTTCTCAAGGATGTGATGGAATCAATGGATAAAGAGGAAATAGAA           | 540 |

|                     |     |                                                                 |     |
|---------------------|-----|-----------------------------------------------------------------|-----|
| PB1 245467 MiSeq    | 541 | ATAACAACACATTTCCAAAGGAAAAAGAAGAGTGAGAGACAACATGACCAAGAAAATGGTC   | 600 |
| PB1 245467 Method A | 541 | ATAACAACACATTTCCAAAGGAAAAAGAAGAGTGAGAGACAACATGACCAAGAAAATGGTC   | 600 |
| PB1 245467 Method S | 541 | ATAACAACG C ATTTCCAAAGGAAAAAGAAGAGTGAGAGACAACATGACCAAGAAAATGGTC | 600 |
| PB1 245467 Method E | 541 | ATAACAACACATTTCCAAAGGAAAAAGAAGAGTGAGAGACAACATGACCAAGAAAATGGTC   | 600 |
| PB1 245467 Method K | 541 | ATAACAACACATTTCCAAAGGAAAAAGAAGAGTGAGAGACAACATGACCAAGAAAATGGTC   | 600 |
| PB1 245467 Method N | 541 | ATAACAACACATTTCCAAAGGAAAAAGAAGAGTGAGAGACAACATGACCAAGAAAATGGTC   | 600 |

|                     |     |                                                                |     |
|---------------------|-----|----------------------------------------------------------------|-----|
| PB1 245467 MiSeq    | 601 | ACACAAAGGACAATAGGAAAGAAGAAACAAAGATTAAACAAAAGGAGCTATCTGATAAGA   | 660 |
| PB1 245467 Method A | 601 | ACACAAAGGACAATAGGAAAGAAGAAACAAAGATTAAACAAAAGGAGCTATCTGATAAGA   | 660 |
| PB1 245467 Method S | 601 | ACACAAAGGACAATAGGAAAGAAGAAACAAAGG T TAAACAAAAGGAGCTATCTGATAAGA | 660 |
| PB1 245467 Method E | 601 | ACACAAAGGACAATAGGAAAGAAGAAACAAAGATTAAACAAAAGGAGCTATCTGATAAGA   | 660 |
| PB1 245467 Method K | 601 | ACACAAAGGACAATAGGAAAGAAGAAACAAAGATTAAACAAAAGGAGCTATCTGATAAGA   | 660 |
| PB1 245467 Method N | 601 | ACACAAAGGACAATAGGAAAGAAGAAACAAAGATTAAACAAAAGGAGCTATCTGATAAGA   | 660 |

|                     |     |                                                                 |     |
|---------------------|-----|-----------------------------------------------------------------|-----|
| PB1 245467 MiSeq    | 661 | GCATTGACATTGAACACAATGACAAAAGACGCCGAAAGAGGGCAAATTAAAGAGAAGGGCA   | 720 |
| PB1 245467 Method A | 661 | GCATTGACATTGAACACAATGACAAAAGACGCCGAAAGAGGGCAAATTAAAGAGAAGGGCA   | 720 |
| PB1 245467 Method S | 661 | GCATTGACA C TGAACACAATGACAAAAGACGCCGAAAGAGGGCAAATTAAAGAGAAGGGCA | 720 |
| PB1 245467 Method E | 661 | GCATTGACATTGAACACAATGACAAAAGACGCCGAAAGAGGGCAAATTAAAGAGAAGGGCA   | 720 |
| PB1 245467 Method K | 661 | GCATTGACATTGAACACAATGACAAAAGACGCCGAAAGAGGGCAAATTAAAGAGAAGGGCA   | 720 |
| PB1 245467 Method N | 661 | GCATTGACATTGAACACAATGACAAAAGACGCCGAAAGAGGGCAAATTAAAGAGAAGGGCA   | 720 |

|                     |     |                                                              |     |
|---------------------|-----|--------------------------------------------------------------|-----|
| PB1 245467 MiSeq    | 721 | ATTGCAACACCCGGGATGCAAATCAGAGGGTTTGTGTACTTTGTTGAAACATTAGCAAGG | 780 |
| PB1 245467 Method A | 721 | ATTGCAACACCCGGGATGCAAATCAGAGGGTTTGTGTACTTTGTTGAAACATTAGCAAGG | 780 |
| PB1 245467 Method S | 721 | ATTGCAACACCCGGGATGCAAATCAGAGGGTTTGTGTACTTTGTTGAAACATTAGCAAGG | 780 |
| PB1 245467 Method E | 721 | ATTGCAACACCCGGGATGCAAATCAGAGGGTTTGTGTACTTTGTTGAAACATTAGCAAGG | 780 |
| PB1 245467 Method K | 721 | ATTGCAACACCCGGGATGCAAATCAGAGGGTTTGTGTACTTTGTTGAAACATTAGCAAGG | 780 |
| PB1 245467 Method N | 721 | ATTGCAACACCCGGGATGCAAATCAGAGGGTTTGTGTACTTTGTTGAAACATTAGCAAGG | 780 |

|                     |     |                                                                 |     |
|---------------------|-----|-----------------------------------------------------------------|-----|
| PB1 245467 MiSeq    | 781 | GGCATTGTGTGAGAACTCGAACAATCTGGACTCCAGTTGGAGGCAATGAAAAAAGGCT      | 840 |
| PB1 245467 Method A | 781 | GGCATTGTGTGAGAACTCGAACAATCTGGACTCCAGTTGGAGGCAATGAAAAAAGGCT      | 840 |
| PB1 245467 Method S | 781 | AGCATTGTGTGAGAACT T GAACAATCTGGACTCCAGTTGGAGGCAATGAAAA G AAGGCT | 840 |
| PB1 245467 Method E | 781 | GGCATTGTGTGAGAACTCGAACAATCTGGACTCCAGTTGGAGGCAATGAAAAAAGGCT      | 840 |
| PB1 245467 Method K | 781 | GGCATTGTGTGAGAACTCGAACAATCTGGACTCCAGTTGGAGGCAATGAAAAAAGGCT      | 840 |
| PB1 245467 Method N | 781 | GGCATTGTGTGAGAACTCGAACAATCTGGACTCCAGTTGGAGGCAATGAAAAAAGGCT      | 840 |

|                     |      |                                                                |      |
|---------------------|------|----------------------------------------------------------------|------|
| PB1 245467 MiSeq    | 841  | AAACTAGCAAATGTCGTGAGAAAGATGATGACTAATTCGCAAGACACAGAGCTCTCTTTTC  | 900  |
| PB1 245467 Method A | 841  | AAACTAGCAAATGTCGTGAGAAAGATGATGACTAATTCGCAAGACACAGAGCTCTCTTTTC  | 900  |
| PB1 245467 Method S | 841  | AAACTAGCAAATGTCGTGAGAAAGATGATGACTAATTCGCAAGACACAGAGCTCTCTTTTC  | 900  |
| PB1 245467 Method E | 841  | AAACTAGCAAATGTCGTGAGAAAGATGATGACTAATTCGCAAGACACAGAGCTCTCTTTTC  | 900  |
| PB1 245467 Method K | 841  | AAACTAGCAAATGTCGTGAGAAAGATGATGACTAATTCGCAAGACACAGAGCTCTCTTTTC  | 900  |
| PB1 245467 Method N | 841  | AAACTAGCAAATGTCGTGAGAAAGATGATGACTAATTCGCAAGACACAGAGCTCTCTTTTC  | 900  |
|                     |      |                                                                |      |
| PB1 245467 MiSeq    | 901  | ACAATCACGGGAGACAACACCAAATGGAATGAGAACCAGAATCCTAGGATGTTTCTGGCA   | 960  |
| PB1 245467 Method A | 901  | ACAATCACGGGAGACAACACCAAATGGAATGAGAACCAGAATCCTAGGATGTTTCTGGCA   | 960  |
| PB1 245467 Method S | 901  | ACAATCACGGGAGACAACACCAAATGGAATGAGAACCAGAATCCTAGGATGTTTCTGGCA   | 960  |
| PB1 245467 Method E | 901  | ACAATCACGGGAGACAACACCAAATGGAATGAGAACCAGAATCCTAGGATGTTTCTGGCA   | 960  |
| PB1 245467 Method K | 901  | ACAATCACGGGAGACAACACCAAATGGAATGAGAACCAGAATCCTAGGATGTTTCTGGCA   | 960  |
| PB1 245467 Method N | 901  | ACAATCACGGGAGACAACACCAAATGGAATGAGAACCAGAATCCTAGGATGTTTCTGGCA   | 960  |
|                     |      |                                                                |      |
| PB1 245467 MiSeq    | 961  | ATGATAACATATATAACAAGGAACCAACCTGAATGGTTCAGGAATGTCTTGAGCATTGCA   | 1020 |
| PB1 245467 Method A | 961  | ATGATAACATATATAACAAGGAACCAACCTGAATGGTTCAGGAATGTCTTGAGCATTGCA   | 1020 |
| PB1 245467 Method S | 961  | ATGATAACATATATAACAAGGAACCAACCTGAATGGTTCAGGAATGTCTTGAGCATTGCA   | 1020 |
| PB1 245467 Method E | 961  | ATGATAACATATATAACAAGGAACCAACCTGAATGGTTCAGGAATGTCTTGAGCATTGCA   | 1020 |
| PB1 245467 Method K | 961  | ATGATAACATATATAACAAGGAACCAACCTGAATGGTTCAGGAATGTCTTGAGCATTGCA   | 1020 |
| PB1 245467 Method N | 961  | ATGATAACATATATAACAAGGAACCAACCTGAATGGTTCAGGAATGTCTTGAGCATTGCA   | 1020 |
|                     |      |                                                                |      |
| PB1 245467 MiSeq    | 1021 | CCTATAATGTTCTCAAATAAAAATGGCAAGACTAGGGAAAGGATACATGTTTCGAAAGTAAG | 1080 |
| PB1 245467 Method A | 1021 | CCTATAATGTTCTCAAATAAAAATGGCAAGACTAGGGAAAGGATACATGTTTCGAAAGTAAG | 1080 |
| PB1 245467 Method S | 1021 | CCTATAATGTTCTCAAATAAAAATGGCAAGACTAGGGAAAGGATACATGTTTCGAAAGTAAG | 1080 |
| PB1 245467 Method E | 1021 | CCTATAATGTTCTCAAATAAAAATGGCAAGACTAGGGAAAGGATACATGTTTCGAAAGTAAG | 1080 |
| PB1 245467 Method K | 1021 | CCTATAATGTTCTCAAATAAAAATGGCAAGACTAGGGAAAGGATACATGTTTCGAAAGTAAG | 1080 |
| PB1 245467 Method N | 1021 | CCTATAATGTTCTCAAATAAAAATGGCAAGACTAGGGAAAGGATACATGTTTCGAAAGTAAG | 1080 |
|                     |      |                                                                |      |
| PB1 245467 MiSeq    | 1081 | AGCATGAAGCTTCGAACACAAATACCGGCAGAAATGCTAGCAAGCATCGATCTGAAGTAC   | 1140 |
| PB1 245467 Method A | 1081 | AGCATGAAGCTTCGAACACAAATACCGGCAGAAATGCTAGCAAGCATCGATCTGAAGTAC   | 1140 |
| PB1 245467 Method S | 1081 | AGCATGAAGCTTCGAACACAAATACCGGCAGAAATGCTAGCAAGCATCGATCTGAAGTAC   | 1140 |
| PB1 245467 Method E | 1081 | AGCATGAAGCTTCGAACACAAATACCGGCAGAAATGCTAGCAAGCATCGATCTGAAGTAC   | 1140 |
| PB1 245467 Method K | 1081 | AGCATGAAGCTTCGAACACAAATACCGGCAGAAATGCTAGCAAGCATCGATCTGAAGTAC   | 1140 |
| PB1 245467 Method N | 1081 | AGCATGAAGCTTCGAACACAAATACCGGCAGAAATGCTAGCAAGCATCGATCTGAAGTAC   | 1140 |

|                     |      |                                                                  |      |
|---------------------|------|------------------------------------------------------------------|------|
| PB1 245467 MiSeq    | 1141 | TTCAATGAGTCAACAAAAAAGAAAAATAGAGAAGACAAGACCTCTTCTAATAGATGGCACG    | 1200 |
| PB1 245467 Method A | 1141 | TTCAATGAGTCAACAAAAAAGAAAAATAGAGAAGACAAGACCTCTTCTAATAGATGGCACG    | 1200 |
| PB1 245467 Method S | 1141 | TTCAATGAGTCAACAAAGAAAAGAAAAATAGAGAAGATTAAGACCTCTTCTAATAGATGGTACG | 1200 |
| PB1 245467 Method E | 1141 | TTCAATGAGTCAACAAAAAAGAAAAATAGAGAAGACAAGACCTCTTCTAATAGATGGCACG    | 1200 |
| PB1 245467 Method K | 1141 | TTCAATGAGTCAACAAAAAAGAAAAATAGAGAAGACAAGACCTCTTCTAATAGATGGCACG    | 1200 |
| PB1 245467 Method N | 1141 | TTCAATGAGTCAACAAAAAAGAAAAATAGAGAAGACAAGACCTCTTCTAATAGATGGCACG    | 1200 |

|                     |      |                                                              |      |
|---------------------|------|--------------------------------------------------------------|------|
| PB1 245467 MiSeq    | 1201 | GCCTCATTAAGCCCTGGAATGATGATGGGCATGTTCAACATGCTGAGTACAGTTTGGGA  | 1260 |
| PB1 245467 Method A | 1201 | GCCTCATTAAGCCCTGGAATGATGATGGGCATGTTCAACATGCTGAGTACAGTTTGGGA  | 1260 |
| PB1 245467 Method S | 1201 | GCCTCATTAAGCCCTGGAATGATGATGGGCATGTTCAACATGCTGAGTACAGTTCTGGGA | 1260 |
| PB1 245467 Method E | 1201 | GCCTCATTAAGCCCTGGAATGATGATGGGCATGTTCAACATGCTGAGTACAGTTTGGGA  | 1260 |
| PB1 245467 Method K | 1201 | GCCTCATTAAGCCCTGGAATGATGATGGGCATGTTCAACATGCTGAGTACAGTTTGGGA  | 1260 |
| PB1 245467 Method N | 1201 | GCCTCATTAAGCCCTGGAATGATGATGGGCATGTTCAACATGCTGAGTACAGTTTGGGA  | 1260 |

|                     |      |                                                                |      |
|---------------------|------|----------------------------------------------------------------|------|
| PB1 245467 MiSeq    | 1261 | GTTTCGATTTTGAATCTAGGGCAAAAAGAGGCACACCAAAAACAACATACTGGTGGGATGGA | 1320 |
| PB1 245467 Method A | 1261 | GTTTCGATTTTGAATCTAGGGCAAAAAGAGGCACACCAAAAACAACATACTGGTGGGATGGA | 1320 |
| PB1 245467 Method S | 1261 | GTTTCGATTCTAATCTAGGGCAAAAAGAGGTACACCAAAAACAACATACTGGTGGGATGGA  | 1320 |
| PB1 245467 Method E | 1261 | GTTTCGATTTTGAATCTAGGGCAAAAAGAGGCACACCAAAAACAACATACTGGTGGGATGGA | 1320 |
| PB1 245467 Method K | 1261 | GTTTCGATTTTGAATCTAGGGCAAAAAGAGGCACACCAAAAACAACATACTGGTGGGATGGA | 1320 |
| PB1 245467 Method N | 1261 | GTTTCGATTTTGAATCTAGGGCAAAAAGAGGCACACCAAAAACAACATACTGGTGGGATGGA | 1320 |

|                     |      |                                                              |      |
|---------------------|------|--------------------------------------------------------------|------|
| PB1 245467 MiSeq    | 1321 | CTACAATCCTCTGATGACTTTGCTCTCATAGTGAATGCTCCGAATCATGAGGGAATACAA | 1380 |
| PB1 245467 Method A | 1321 | CTACAATCCTCTGATGACTTTGCTCTCATAGTGAATGCTCCGAATCATGAGGGAATACAA | 1380 |
| PB1 245467 Method S | 1321 | CTACAATCCTCTGATGACTTTGCTCTCATAGTGAATGCTCCGAATCATGAGGGAATACAA | 1380 |
| PB1 245467 Method E | 1321 | CTACAATCCTCTGATGACTTTGCTCTCATAGTGAATGCTCCGAATCATGAGGGAATACAA | 1380 |
| PB1 245467 Method K | 1321 | CTACAATCCTCTGATGACTTTGCTCTCATAGTGAATGCTCCGAATCATGAGGGAATACAA | 1380 |
| PB1 245467 Method N | 1321 | CTACAATCCTCTGATGACTTTGCTCTCATAGTGAATGCTCCGAATCATGAGGGAATACAA | 1380 |

|                     |      |                                                              |      |
|---------------------|------|--------------------------------------------------------------|------|
| PB1 245467 MiSeq    | 1381 | GCAGGGGTAGACAGATTCTATAGAACCTGCAAGCTGGTCGGAATCAACATGAGCAAAAAG | 1440 |
| PB1 245467 Method A | 1381 | GCAGGGGTAGACAGATTCTATAGAACCTGCAAGCTGGTCGGAATCAACATGAGCAAAAAG | 1440 |
| PB1 245467 Method S | 1381 | GCAGGAGTAGACAGATTCTATAGAACCTGCAAGCTGGTCGGAATCAACATGAGCAAAAAG | 1440 |
| PB1 245467 Method E | 1381 | GCAGGGGTAGACAGATTCTATAGAACCTGCAAGCTGGTCGGAATCAACATGAGCAAAAAG | 1440 |
| PB1 245467 Method K | 1381 | GCAGGGGTAGACAGATTCTATAGAACCTGCAAGCTGGTCGGAATCAACATGAGCAAAAAG | 1440 |
| PB1 245467 Method N | 1381 | GCAGGGGTAGACAGATTCTATAGAACCTGCAAGCTGGTCGGAATCAACATGAGCAAAAAG | 1440 |

|                     |      |                                                                |      |
|---------------------|------|----------------------------------------------------------------|------|
| PB1 245467 MiSeq    | 1441 | AAGTCCTACATAAAACAGGACAGGAACATTTGAATTCACAAGTTTTTTTCTACCGCTATGGA | 1500 |
| PB1 245467 Method A | 1441 | AAGTCCTACATAAAACAGGACAGGAACATTTGAATTCACAAGTTTTTTTCTACCGCTATGGA | 1500 |
| PB1 245467 Method S | 1441 | AAGTCCTACATAAAACAGGACAGGAACATTTGAATTCACAAGTTTTTTTCTACCGCTATGGA | 1500 |
| PB1 245467 Method E | 1441 | AAGTCCTACATAAAACAGGACAGGAACATTTGAATTCACAAGTTTTTTTCTACCGCTATGGA | 1500 |
| PB1 245467 Method K | 1441 | AAGTCCTACATAAAACAGGACAGGAACATTTGAATTCACAAGTTTTTTTCTACCGCTATGGA | 1500 |
| PB1 245467 Method N | 1441 | AAGTCCTACATAAAACAGGACAGGAACATTTGAATTCACAAGTTTTTTTCTACCGCTATGGA | 1500 |

|                     |      |                                                              |      |
|---------------------|------|--------------------------------------------------------------|------|
| PB1 245467 MiSeq    | 1501 | TTTGTAGCCAACTTCAGCATGGAATTGCCCAGCTTTGGAGTGTCTGGGATCAATGAATCT | 1560 |
| PB1 245467 Method A | 1501 | TTTGTAGCCAACTTCAGCATGGAATTGCCCAGCTTTGGAGTGTCTGGGATCAATGAATCT | 1560 |
| PB1 245467 Method S | 1501 | TTTGTAGCCAACTTCAGCATGGAATTGCCCAGCTTTGGAGTGTCTGGGATCAATGAATCT | 1560 |
| PB1 245467 Method E | 1501 | TTTGTAGCCAACTTCAGCATGGAATTGCCCAGCTTTGGAGTGTCTGGGATCAATGAATCT | 1560 |
| PB1 245467 Method K | 1501 | TTTGTAGCCAACTTCAGCATGGAATTGCCCAGCTTTGGAGTGTCTGGGATCAATGAATCT | 1560 |
| PB1 245467 Method N | 1501 | TTTGTAGCCAACTTCAGCATGGAATTGCCCAGCTTTGGAGTGTCTGGGATCAATGAATCT | 1560 |

|                     |      |                                                              |      |
|---------------------|------|--------------------------------------------------------------|------|
| PB1 245467 MiSeq    | 1561 | GCGGACATGAGTATTGGAGTAACAGTGATAAAGAACAACATGATCAACAATGATCTTGGA | 1620 |
| PB1 245467 Method A | 1561 | GCGGACATGAGTATTGGAGTAACAGTGATAAAGAACAACATGATCAACAATGATCTTGGA | 1620 |
| PB1 245467 Method S | 1561 | GCGGACATGAGTATTGGAGTAACAGTGATAAAGAACAACATGATCAACAATGATCTTGGA | 1620 |
| PB1 245467 Method E | 1561 | GCGGACATGAGTATTGGAGTAACAGTGATAAAGAACAACATGATCAACAATGATCTTGGA | 1620 |
| PB1 245467 Method K | 1561 | GCGGACATGAGTATTGGAGTAACAGTGATAAAGAACAACATGATCAACAATGATCTTGGA | 1620 |
| PB1 245467 Method N | 1561 | GCGGACATGAGTATTGGAGTAACAGTGATAAAGAACAACATGATCAACAATGATCTTGGA | 1620 |

|                     |      |                                                               |      |
|---------------------|------|---------------------------------------------------------------|------|
| PB1 245467 MiSeq    | 1621 | CCAGCAACAGCCCCAAATGGCTCTACAGCTATTCATCAAGGATTACAGATACACATATCGA | 1680 |
| PB1 245467 Method A | 1621 | CCAGCAACAGCCCCAAATGGCTCTACAGCTATTCATCAAGGATTACAGATACACATATCGA | 1680 |
| PB1 245467 Method S | 1621 | CCAGCAACAGCCCCAAATGGCTCTACAGCTATTCATCAAGGATTACAGATACACATATCGA | 1680 |
| PB1 245467 Method E | 1621 | CCAGCAACAGCCCCAAATGGCTCTACAGCTATTCATCAAGGATTACAGATACACATATCGA | 1680 |
| PB1 245467 Method K | 1621 | CCAGCAACAGCCCCAAATGGCTCTACAGCTATTCATCAAGGATTACAGATACACATATCGA | 1680 |
| PB1 245467 Method N | 1621 | CCAGCAACAGCCCCAAATGGCTCTACAGCTATTCATCAAGGATTACAGATACACATATCGA | 1680 |

|                     |      |                                                              |      |
|---------------------|------|--------------------------------------------------------------|------|
| PB1 245467 MiSeq    | 1681 | TGTCACAGAGGAGACACACAAATTCAAACAAGGAGGTCATTTGAGCTGAAGAAGTTATGG | 1740 |
| PB1 245467 Method A | 1681 | TGTCACAGAGGAGACACACAAATTCAAACAAGGAGGTCATTTGAGCTGAAGAAGTTATGG | 1740 |
| PB1 245467 Method S | 1681 | TGTCACAGAGGAGACACACAAATTCAAACAAGGAGGTCATTTGAGCTGAAGAAGTTATGG | 1740 |
| PB1 245467 Method E | 1681 | TGTCACAGAGGAGACACACAAATTCAAACAAGGAGGTCATTTGAGCTGAAGAAGTTATGG | 1740 |
| PB1 245467 Method K | 1681 | TGTCACAGAGGAGACACACAAATTCAAACAAGGAGGTCATTTGAGCTGAAGAAGTTATGG | 1740 |
| PB1 245467 Method N | 1681 | TGTCACAGAGGAGACACACAAATTCAAACAAGGAGGTCATTTGAGCTGAAGAAGTTATGG | 1740 |

|                     |      |                                                              |      |
|---------------------|------|--------------------------------------------------------------|------|
| PB1 245467 MiSeq    | 1741 | GAACAAACCCGCTCAAAAGCAGGACTGCTGGTCTCAGATGGAGGACCAAATCTATACAAT | 1800 |
| PB1 245467 Method A | 1741 | GAACAAACCCGCTCAAAAGCAGGACTGCTGGTCTCAGATGGAGGACCAAATCTATACAAT | 1800 |
| PB1 245467 Method S | 1741 | GAACAAACCCGCTCAAAAGCAGGACTGCTGGTCTCAGATGGAGGACCAAATCTATACAAT | 1800 |
| PB1 245467 Method E | 1741 | GAACAAACCCGCTCAAAAGCAGGACTGCTGGTCTCAGATGGAGGACCAAATCTATACAAT | 1800 |
| PB1 245467 Method K | 1741 | GAACAAACCCGCTCAAAAGCAGGACTGCTGGTCTCAGATGGAGGACCAAATCTATACAAT | 1800 |
| PB1 245467 Method N | 1741 | GAACAAACCCGCTCAAAAGCAGGACTGCTGGTCTCAGATGGAGGACCAAATCTATACAAT | 1800 |

|                     |      |                                                               |      |
|---------------------|------|---------------------------------------------------------------|------|
| PB1 245467 MiSeq    | 1801 | ATCCGGAATCTCCACATTCCGGAAGTCTGTTTAAAATGGGAAC TAATGGATGAAGACTAT | 1860 |
| PB1 245467 Method A | 1801 | ATCCGGAATCTCCACATTCCGGAAGTCTGTTTAAAATGGGAAC TAATGGATGAAGACTAT | 1860 |
| PB1 245467 Method S | 1801 | ATCCGGAATCTCCACATTCCGGAAGTCTGTTTAAAATGGGAAC TAATGGATGAAGACTAT | 1860 |
| PB1 245467 Method E | 1801 | ATCCGGAATCTCCACATTCCGGAAGTCTGTTTAAAATGGGAAC TAATGGATGAAGACTAT | 1860 |
| PB1 245467 Method K | 1801 | ATCCGGAATCTCCACATTCCGGAAGTCTGTTTAAAATGGGAAC TAATGGATGAAGACTAT | 1860 |
| PB1 245467 Method N | 1801 | ATCCGGAATCTCCACATTCCGGAAGTCTGTTTAAAATGGGAAC TAATGGATGAAGACTAT | 1860 |

|                     |      |                                                               |      |
|---------------------|------|---------------------------------------------------------------|------|
| PB1 245467 MiSeq    | 1861 | CAGGGAAGGCTTTGTAATCCTCTGAATCCGTTTGT CAGCCACAAAGAAATAGAGTCTGTG | 1920 |
| PB1 245467 Method A | 1861 | CAGGGAAGGCTTTGTAATCCTCTGAATCCGTTTGT CAGCCACAAAGAAATAGAGTCTGTG | 1920 |
| PB1 245467 Method S | 1861 | CAGGGAAGGCTTTGTAATCCTCTGAATCCGTTTGT CAGCCACAAAGAAATAGAGTCTGTG | 1920 |
| PB1 245467 Method E | 1861 | CAGGGAAGGCTTTGTAATCCTCTGAATCCGTTTGT CAGCCACAAAGAAATAGAGTCTGTG | 1920 |
| PB1 245467 Method K | 1861 | CAGGGAAGGCTTTGTAATCCTCTGAATCCGTTTGT CAGCCACAAAGAAATAGAGTCTGTG | 1920 |
| PB1 245467 Method N | 1861 | CAGGGAAGGCTTTGTAATCCTCTGAATCCGTTTGT CAGCCACAAAGAAATAGAGTCTGTG | 1920 |

|                     |      |                                                              |      |
|---------------------|------|--------------------------------------------------------------|------|
| PB1 245467 MiSeq    | 1921 | AACAATGCTGTGGTGATGCCAGCGCATGGCCCAGCCAAGAGTATGGAATATGATGCTGTT | 1980 |
| PB1 245467 Method A | 1921 | AACAATGCTGTGGTGATGCCAGCGCATGGCCCAGCCAAGAGTATGGAATATGATGCTGTT | 1980 |
| PB1 245467 Method S | 1921 | AACAATGCTGTGGTGATGCCAGCGCATGGCCCAGCCAAGAGTATGGAATATGATGCTGTT | 1980 |
| PB1 245467 Method E | 1921 | AACAATGCTGTGGTGATGCCAGCGCATGGCCCAGCCAAGAGTATGGAATATGATGCTGTT | 1980 |
| PB1 245467 Method K | 1921 | AACAATGCTGTGGTGATGCCAGCGCATGGCCCAGCCAAGAGTATGGAATATGATGCTGTT | 1980 |
| PB1 245467 Method N | 1921 | AACAATGCTGTGGTGATGCCAGCGCATGGCCCAGCCAAGAGTATGGAATATGATGCTGTT | 1980 |

|                     |      |                                                                |      |
|---------------------|------|----------------------------------------------------------------|------|
| PB1 245467 MiSeq    | 1981 | GCCACCACTCATTTCCTGGATTTCCTAAGAGGAACCGCTCCATTCTCAATACAAGCCAAAGG | 2040 |
| PB1 245467 Method A | 1981 | GCCACCACTCATTTCCTGGATTTCCTAAGAGGAACCGCTCCATTCTCAATACAAGCCAAAGG | 2040 |
| PB1 245467 Method S | 1981 | GCCACCACTCATTTCCTGGATTTCCTAAGAGGAACCGCTCCATTCTCAATACAAGCCAAAGG | 2040 |
| PB1 245467 Method E | 1981 | GCCACCACTCATTTCCTGGATTTCCTAAGAGGAACCGCTCCATTCTCAATACAAGCCAAAGG | 2040 |
| PB1 245467 Method K | 1981 | GCCACCACTCATTTCCTGGATTTCCTAAGAGGAACCGCTCCATTCTCAATACAAGCCAAAGG | 2040 |
| PB1 245467 Method N | 1981 | GCCACCACTCATTTCCTGGATTTCCTAAGAGGAACCGCTCCATTCTCAATACAAGCCAAAGG | 2040 |

|                            |      |                                                                |      |
|----------------------------|------|----------------------------------------------------------------|------|
| <b>PB1 245467 MiSeq</b>    | 2041 | GGAATCCTTGAAGACGAACAGATGTATCAAAAGTGCTGCAATCTGTTTGAAAAATTCTTC   | 2100 |
| <b>PB1 245467 Method A</b> | 2041 | GGAATCCTTGAAGACGAACAGATGTATCAAAAGTGCTGCAATCTGTTTGAAAAATTCTTC   | 2100 |
| <b>PB1 245467 Method S</b> | 2041 | GGAATCCTTGAAGACGAACAGATGTATCAAAAGTGCTGCAATCTA TTTTGAAAAATTCTTC | 2100 |
| <b>PB1 245467 Method E</b> | 2041 | GGAATCCTTGAAGACGAACAGATGTATCAAAAGTGCTGCAATCTGTTTGAAAAATTCTTC   | 2100 |
| <b>PB1 245467 Method K</b> | 2041 | GGAATCCTTGAAGACGAACAGATGTATCAAAAGTGCTGCAATCTGTTTGAAAAATTCTTC   | 2100 |
| <b>PB1 245467 Method N</b> | 2041 | GGAATCCTTGAAGACGAACAGATGTATCAAAAGTGCTGCAATCTGTTTGAAAAATTCTTC   | 2100 |

|                            |      |                                                              |      |
|----------------------------|------|--------------------------------------------------------------|------|
| <b>PB1 245467 MiSeq</b>    | 2101 | CCTAGCAGTTCATACAGGAGGCCGGTTGGAATTTCCAGCATGGTGGAGGCCATGGTTTCT | 2160 |
| <b>PB1 245467 Method A</b> | 2101 | CCTAGCAGTTCATACAGGAGGCCGGTTGGAATTTCCAGCATGGTGGAGGCCATGGTTTCT | 2160 |
| <b>PB1 245467 Method S</b> | 2101 | CCTAGCAGTTCATACAGGAGGCCGGTTGGAATTTCCAGCATGGTGGAGGCCATGGTTTCT | 2160 |
| <b>PB1 245467 Method E</b> | 2101 | CCTAGCAGTTCATACAGGAGGCCGGTTGGAATTTCCAGCATGGTGGAGGCCATGGTTTCT | 2160 |
| <b>PB1 245467 Method K</b> | 2101 | CCTAGCAGTTCATACAGGAGGCCGGTTGGAATTTCCAGCATGGTGGAGGCCATGGTTTCT | 2160 |
| <b>PB1 245467 Method N</b> | 2101 | CCTAGCAGTTCATACAGGAGGCCGGTTGGAATTTCCAGCATGGTGGAGGCCATGGTTTCT | 2160 |

|                            |      |                                                              |      |
|----------------------------|------|--------------------------------------------------------------|------|
| <b>PB1 245467 MiSeq</b>    | 2161 | AGGGCCCGAATTGATGCGCGAATTGACTTCGAGTCTGGACGGATTAAGAAGGAGGAGTTT | 2220 |
| <b>PB1 245467 Method A</b> | 2161 | AGGGCCCGAATTGATGCGCGAATTGACTTCGAGTCTGGACGGATTAAGAAGGAGGAGTTT | 2220 |
| <b>PB1 245467 Method S</b> | 2161 | AGGGCCCGAATTGATGCGCGAATTGACTTCGA TCTGGACGGATTAAGAAGGAGGAGTTT | 2220 |
| <b>PB1 245467 Method E</b> | 2161 | AGGGCCCGAATTGATGCGCGAATTGACTTCGAGTCTGGACGGATTAAGAAGGAGGAGTTT | 2220 |
| <b>PB1 245467 Method K</b> | 2161 | AGGGCCCGAATTGATGCGCGAATTGACTTCGAGTCTGGACGGATTAAGAAGGAGGAGTTT | 2220 |
| <b>PB1 245467 Method N</b> | 2161 | AGGGCCCGAATTGATGCGCGAATTGACTTCGAGTCTGGACGGATTAAGAAGGAGGAGTTT | 2220 |

|                            |      |                                                         |      |
|----------------------------|------|---------------------------------------------------------|------|
| <b>PB1 245467 MiSeq</b>    | 2221 | GCTGAGATCATGAAGACCTGTTCCACCATTGAAGAGCTCAGACGGCAGAAATAG  | 2274 |
| <b>PB1 245467 Method A</b> | 2221 | GCTGAGATCATGAAGACCTGTTCCACCATTGAAGAGCTCAGACGGCAGAAATAG  | 2274 |
| <b>PB1 245467 Method S</b> | 2221 | GCTGAGATCATGAAGA TCTGTTCCACCATTGAAGAGCTCAGACGGCAGAAATAG | 2274 |
| <b>PB1 245467 Method E</b> | 2221 | GCTGAGATCATGAAGACCTGTTCCACCATTGAAGAGCTCAGACGGCAGAAATAG  | 2274 |
| <b>PB1 245467 Method K</b> | 2221 | GCTGAGATCATGAAGACCTGTTCCACCATTGAAGAGCTCAGACGGCAGAAATAG  | 2274 |
| <b>PB1 245467 Method N</b> | 2221 | GCTGAGATCATGAAGACCTGTTCCACCATTGAAGAGCTCAGACGGCAGAAATAG  | 2274 |
