# Supplementary material for: An Evaluation of Avian Influenza Virus Whole Genome Sequencing Approaches Using Nanopore Technology
Source: Preprints.org preprint supplement (doi:10.20944/preprints202301.0480.v1), 2023-01-26
Supplement: Supplementary file 11 [file supplementary]

## Formatted Alignments

|                           |   |                                                              |    |
|---------------------------|---|--------------------------------------------------------------|----|
| <b>NP 246038 MiSeq</b>    | 1 | ATGGCGTCTCAAGGCACCAAACGATCCTATGAACAAATGGAAACTGGTGGGGAACGCCAG | 60 |
| <b>NP 246038 Method A</b> | 1 | ATGGCGTCTCAAGGCACCAAACGATCCTATGAACAAATGGAAACTGGTGGGGAACGCCAG | 60 |
| <b>NP 246038 Method S</b> | 1 | ATGGCGTCTCAAGGCACCAAACGATCCTATGAACAAATGGAAACTGGTGGGGAACGCCAG | 60 |
| <b>NP 246038 Method E</b> | 1 | ATGGCGTCTCAAGGCACCAAACGATCCTATGAACAAATGGAAACTGGTGGGGAACGCCAG | 60 |
| <b>NP 246038 Method K</b> | 1 | ATGGCGTCTCAAGGCACCAAACGATCCTATGAACAAATGGAAACTGGTGGGGAACGCCAG | 60 |
| <b>NP 246038 Method N</b> | 1 | ATGGCGTCTCAAGGCACCAAACGATCCTATGAACAAATGGAAACTGGTGGGGAACGCCAG | 60 |

|                           |    |                                                              |     |
|---------------------------|----|--------------------------------------------------------------|-----|
| <b>NP 246038 MiSeq</b>    | 61 | AATGCCACTGAAATCAGAGCATCTGTTGGAAGAATGGTTGGCGGAATCGGGAGATTCTAC | 120 |
| <b>NP 246038 Method A</b> | 61 | AATGCCACTGAAATCAGAGCATCTGTTGGAAGAATGGTTGGCGGAATCGGGAGATTCTAC | 120 |
| <b>NP 246038 Method S</b> | 61 | AATGCCACTGAAATCAGAGCATCTGTTGGAAGAATGGTTGGCGGAATCGGGAGATTCTAC | 120 |
| <b>NP 246038 Method E</b> | 61 | AATGCCACTGAAATCAGAGCATCTGTTGGAAGAATGGTTGGCGGAATCGGGAGATTCTAC | 120 |
| <b>NP 246038 Method K</b> | 61 | AATGCCACTGAAATCAGAGCATCTGTTGGAAGAATGGTTGGCGGAATCGGGAGATTCTAC | 120 |
| <b>NP 246038 Method N</b> | 61 | AATGCCACTGAAATCAGAGCATCTGTTGGAAGAATGGTTGGCGGAATCGGGAGATTCTAC | 120 |

|                           |     |                                                               |     |
|---------------------------|-----|---------------------------------------------------------------|-----|
| <b>NP 246038 MiSeq</b>    | 121 | ATACAGATGTGCACTGAGCTCAAACCTCAGTGATTACGAAGGGAGGCTGATCCAAAACAGC | 180 |
| <b>NP 246038 Method A</b> | 121 | ATACAGATGTGCACTGAGCTCAAACCTCAGTGATTACGAAGGGAGGCTGATCCAAAACAGC | 180 |
| <b>NP 246038 Method S</b> | 121 | ATACAGATGTGCACTGAGCTCAAACCTCAGTGATTACGAAGGGAGGCTGATCCAAAACAGC | 180 |
| <b>NP 246038 Method E</b> | 121 | ATACAGATGTGCACTGAGCTCAAACCTCAGTGATTACGAAGGGAGGCTGATCCAAAACAGC | 180 |
| <b>NP 246038 Method K</b> | 121 | ATACAGATGTGCACTGAGCTCAAACCTCAGTGATTACGAAGGGAGGCTGATCCAAAACAGC | 180 |
| <b>NP 246038 Method N</b> | 121 | ATACAGATGTGCACTGAGCTCAAACCTCAGTGATTACGAAGGGAGGCTGATCCAAAACAGC | 180 |

|                           |     |                                                              |     |
|---------------------------|-----|--------------------------------------------------------------|-----|
| <b>NP 246038 MiSeq</b>    | 181 | ATAACCATAGAAAGGATGGTTCTCTCGGCATTTGATGAGAGGAGGAACAAGTATCTGGAG | 240 |
| <b>NP 246038 Method A</b> | 181 | ATAACCATAGAAAGGATGGTTCTCTCGGCATTTGATGAGAGGAGGAACAAGTATCTGGAG | 240 |
| <b>NP 246038 Method S</b> | 181 | ATAACCATAGAAAGGATGGTTCTCTCGGCATTTGATGAGAGGAGGAACAAGTATCTGGAG | 240 |
| <b>NP 246038 Method E</b> | 181 | ATAACCATAGAAAGGATGGTTCTCTCGGCATTTGATGAGAGGAGGAACAAGTATCTGGAG | 240 |
| <b>NP 246038 Method K</b> | 181 | ATAACCATAGAAAGGATGGTTCTCTCGGCATTTGATGAGAGGAGGAACAAGTATCTGGAG | 240 |
| <b>NP 246038 Method N</b> | 181 | ATAACCATAGAAAGGATGGTTCTCTCGGCATTTGATGAGAGGAGGAACAAGTATCTGGAG | 240 |

|                           |     |                                                              |     |
|---------------------------|-----|--------------------------------------------------------------|-----|
| <b>NP 246038 MiSeq</b>    | 241 | GAACATCCCAGTGCTGGGAAGGATCCCAAGAAGACTGGAGGTCCAATCTACAGGAGGAGA | 300 |
| <b>NP 246038 Method A</b> | 241 | GAACATCCCAGTGCTGGGAAGGATCCCAAGAAGACTGGAGGTCCAATCTACAGGAGGAGA | 300 |
| <b>NP 246038 Method S</b> | 241 | GAACATCCCAGTGCTGGGAAGGATCCCAAGAAGACTGGAGGTCCAATCTACAGGAGGAGA | 300 |
| <b>NP 246038 Method E</b> | 241 | GAACATCCCAGTGCTGGGAAGGATCCCAAGAAGACTGGAGGTCCAATCTACAGGAGGAGA | 300 |
| <b>NP 246038 Method K</b> | 241 | GAACATCCCAGTGCTGGGAAGGATCCCAAGAAGACTGGAGGTCCAATCTACAGGAGGAGA | 300 |
| <b>NP 246038 Method N</b> | 241 | GAACATCCCAGTGCTGGGAAGGATCCCAAGAAGACTGGAGGTCCAATCTACAGGAGGAGA | 300 |

|                           |     |                                                              |     |
|---------------------------|-----|--------------------------------------------------------------|-----|
| <b>NP 246038 MiSeq</b>    | 301 | GATGGCAAATGGATGAGAGAGTTGATCCTTTACGACAAAGAAGAAATCAGAAGAATTTGG | 360 |
| <b>NP 246038 Method A</b> | 301 | GATGGCAAATGGATGAGAGAGTTGATCCTTTACGACAAAGAAGAAATCAGAAGAATTTGG | 360 |
| <b>NP 246038 Method S</b> | 301 | GATGGCAAATGGATGAGAGAGTTGATCCTTTACGACAAAGAAGAAATCAGAAGAATTTGG | 360 |
| <b>NP 246038 Method E</b> | 301 | GATGGCAAATGGATGAGAGAGTTGATCCTTTACGACAAAGAAGAAATCAGAAGAATTTGG | 360 |
| <b>NP 246038 Method K</b> | 301 | GATGGCAAATGGATGAGAGAGTTGATCCTTTACGACAAAGAAGAAATCAGAAGAATTTGG | 360 |
| <b>NP 246038 Method N</b> | 301 | GATGGCAAATGGATGAGAGAGTTGATCCTTTACGACAAAGAAGAAATCAGAAGAATTTGG | 360 |

|                           |     |                                                              |     |
|---------------------------|-----|--------------------------------------------------------------|-----|
| <b>NP 246038 MiSeq</b>    | 361 | CGTCAAGCTAATAATGGAGAGGATGCCACTGCTGGTCTCACTCATTTGATGATTTGGCAT | 420 |
| <b>NP 246038 Method A</b> | 361 | CGTCAAGCTAATAATGGAGAGGATGCCACTGCTGGTCTCACTCATTTGATGATTTGGCAT | 420 |
| <b>NP 246038 Method S</b> | 361 | CGTCAAGCTAATAATGGAGAGGATGCCACTGCTGGTCTCACTCATTTGATGATTTGGCAT | 420 |
| <b>NP 246038 Method E</b> | 361 | CGTCAAGCTAATAATGGAGAGGATGCCACTGCTGGTCTCACTCATTTGATGATTTGGCAT | 420 |
| <b>NP 246038 Method K</b> | 361 | CGTCAAGCTAATAATGGAGAGGATGCCACTGCTGGTCTCACTCATTTGATGATTTGGCAT | 420 |
| <b>NP 246038 Method N</b> | 361 | CGTCAAGCTAATAATGGAGAGGATGCCACTGCTGGTCTCACTCATTTGATGATTTGGCAT | 420 |

|                           |     |                                                              |     |
|---------------------------|-----|--------------------------------------------------------------|-----|
| <b>NP 246038 MiSeq</b>    | 421 | TCCAATCTGAATGATGCCACATACCAGAGAACAAGGGCACTTGTGCGTACTGGAATGGAC | 480 |
| <b>NP 246038 Method A</b> | 421 | TCCAATCTGAATGATGCCACATACCAGAGAACAAGGGCACTTGTGCGTACTGGAATGGAC | 480 |
| <b>NP 246038 Method S</b> | 421 | TCCAATCTGAATGATGCCACATACCAGAGAACAAGGGCACTTGTGCGTACTGGAATGGAC | 480 |
| <b>NP 246038 Method E</b> | 421 | TCCAATCTGAATGATGCCACATACCAGAGAACAAGGGCACTTGTGCGTACTGGAATGGAC | 480 |
| <b>NP 246038 Method K</b> | 421 | TCCAATCTGAATGATGCCACATACCAGAGAACAAGGGCACTTGTGCGTACTGGAATGGAC | 480 |
| <b>NP 246038 Method N</b> | 421 | TCCAATCTGAATGATGCCACATACCAGAGAACAAGGGCACTTGTGCGTACTGGAATGGAC | 480 |

|                           |     |                                                               |     |
|---------------------------|-----|---------------------------------------------------------------|-----|
| <b>NP 246038 MiSeq</b>    | 481 | CCTAGGATGTGCTCTCTGATGCAAGGATCAACCCTCCCTAGGAGATCCGGGGGCTGCTGGA | 540 |
| <b>NP 246038 Method A</b> | 481 | CCTAGGATGTGCTCTCTGATGCAAGGATCAACCCTCCCTAGGAGATCCGGGGGCTGCTGGA | 540 |
| <b>NP 246038 Method S</b> | 481 | CCTAGGATGTGCTCTCTGATGCAAGGATCAACCCTCCCTAGGAGATCCGGGGGCTGCTGGA | 540 |
| <b>NP 246038 Method E</b> | 481 | CCTAGGATGTGCTCTCTGATGCAAGGATCAACCCTCCCTAGGAGATCCGGGGGCTGCTGGA | 540 |
| <b>NP 246038 Method K</b> | 481 | CCTAGGATGTGCTCTCTGATGCAAGGATCAACCCTCCCTAGGAGATCCGGGGGCTGCTGGA | 540 |
| <b>NP 246038 Method N</b> | 481 | CCTAGGATGTGCTCTCTGATGCAAGGATCAACCCTCCCTAGGAGATCCGGGGGCTGCTGGA | 540 |

|                           |     |                                                               |     |
|---------------------------|-----|---------------------------------------------------------------|-----|
| <b>NP 246038 MiSeq</b>    | 541 | GCAGCAGTGAAAGGAGTTGGAACAATGGTGATGGAATTGATTTCGGATGATCAAACGAGGG | 600 |
| <b>NP 246038 Method A</b> | 541 | GCAGCAGTGAAAGGAGTTGGAACAATGGTGATGGAATTGATTTCGGATGATCAAACGAGGG | 600 |
| <b>NP 246038 Method S</b> | 541 | GCAGCAGTGAAAGGAGTTGGAACAATGGTGATGGAATTGATTTCGGATGATCAAACGAGGG | 600 |
| <b>NP 246038 Method E</b> | 541 | GCAGCAGTGAAAGGAGTTGGAACAATGGTGATGGAATTGATTTCGGATGATCAAACGAGGG | 600 |
| <b>NP 246038 Method K</b> | 541 | GCAGCAGTGAAAGGAGTTGGAACAATGGTGATGGAATTGATTTCGGATGATCAAACGAGGG | 600 |
| <b>NP 246038 Method N</b> | 541 | GCAGCAGTGAAAGGAGTTGGAACAATGGTGATGGAATTGATTTCGGATGATCAAACGAGGG | 600 |

|                           |     |                                                              |     |
|---------------------------|-----|--------------------------------------------------------------|-----|
| <b>NP 246038 MiSeq</b>    | 601 | ATCAATGATCGGAATTTCTGGAGAGGCGAAAATGGACGGAGAACCAGGATTGCCTACGAG | 660 |
| <b>NP 246038 Method A</b> | 601 | ATCAATGATCGGAATTTCTGGAGAGGCGAAAATGGACGGAGAACCAGGATTGCCTACGAG | 660 |
| <b>NP 246038 Method S</b> | 601 | ATCAATGATCGGAATTTCTGGAGAGGCGAAAATGGACGGAGAACCAGGATTGCCTACGAG | 660 |
| <b>NP 246038 Method E</b> | 601 | ATCAATGATCGGAATTTCTGGAGAGGCGAAAATGGACGGAGAACCAGGATTGCCTACGAG | 660 |
| <b>NP 246038 Method K</b> | 601 | ATCAATGATCGGAATTTCTGGAGAGGCGAAAATGGACGGAGAACCAGGATTGCCTACGAG | 660 |
| <b>NP 246038 Method N</b> | 601 | ATCAATGATCGGAATTTCTGGAGAGGCGAAAATGGACGGAGAACCAGGATTGCCTACGAG | 660 |

|                           |     |                                                               |     |
|---------------------------|-----|---------------------------------------------------------------|-----|
| <b>NP 246038 MiSeq</b>    | 661 | AGAATGTGCAACATCCTCAAGGGAAAGTTCCAAACAGCAGCACAAACGAGCAATGATGGAT | 720 |
| <b>NP 246038 Method A</b> | 661 | AGAATGTGCAACATCCTCAAGGGAAAGTTCCAAACAGCAGCACAAACGAGCAATGATGGAT | 720 |
| <b>NP 246038 Method S</b> | 661 | AGAATGTGCAACATCCTCAAGGGAAAGTTCCAAACAGCAGCACAAACGAGCAATGATGGAT | 720 |
| <b>NP 246038 Method E</b> | 661 | AGAATGTGCAACATCCTCAAGGGAAAGTTCCAAACAGCAGCACAAACGAGCAATGATGGAT | 720 |
| <b>NP 246038 Method K</b> | 661 | AGAATGTGCAACATCCTCAAGGGAAAGTTCCAAACAGCAGCACAAACGAGCAATGATGGAT | 720 |
| <b>NP 246038 Method N</b> | 661 | AGAATGTGCAACATCCTCAAGGGAAAGTTCCAAACAGCAGCACAAACGAGCAATGATGGAT | 720 |

|                           |     |                                                               |     |
|---------------------------|-----|---------------------------------------------------------------|-----|
| <b>NP 246038 MiSeq</b>    | 721 | CAAGTGAGGGGAAAGCCGGAATCCTGGAAATGCTGAGATTGAAGATCTCATCTTTCTCGCA | 780 |
| <b>NP 246038 Method A</b> | 721 | CAAGTGAGGGGAAAGCCGGAATCCTGGAAATGCTGAGATTGAAGATCTCATCTTTCTCGCA | 780 |
| <b>NP 246038 Method S</b> | 721 | CAAGTGAGGGGAAAGCCGGAATCCTGGAAATGCTGAGATTGAAGATCTCATCTTTCTCGCA | 780 |
| <b>NP 246038 Method E</b> | 721 | CAAGTGAGGGGAAAGCCGGAATCCTGGAAATGCTGAGATTGAAGATCTCATCTTTCTCGCA | 780 |
| <b>NP 246038 Method K</b> | 721 | CAAGTGAGGGGAAAGCCGGAATCCTGGAAATGCTGAGATTGAAGATCTCATCTTTCTCGCA | 780 |
| <b>NP 246038 Method N</b> | 721 | CAAGTGAGGGGAAAGCCGGAATCCTGGAAATGCTGAGATTGAAGATCTCATCTTTCTCGCA | 780 |

|                           |     |                                                              |     |
|---------------------------|-----|--------------------------------------------------------------|-----|
| <b>NP 246038 MiSeq</b>    | 781 | CGATCTGCTCTCATCCTGAGGGGATCAGTGGCTCATAAGTCCTGTCTGCCTGCTTGCGTG | 840 |
| <b>NP 246038 Method A</b> | 781 | CGATCTGCTCTCATCCTGAGGGGATCAGTGGCTCATAAGTCCTGTCTGCCTGCTTGCGTG | 840 |
| <b>NP 246038 Method S</b> | 781 | CGATCTGCTCTCATCCTGAGGGGATCAGTGGCTCATAAGTCCTGTCTGCCTGCTTGCGTG | 840 |
| <b>NP 246038 Method E</b> | 781 | CGATCTGCTCTCATCCTGAGGGGATCAGTGGCTCATAAGTCCTGTCTGCCTGCTTGCGTG | 840 |
| <b>NP 246038 Method K</b> | 781 | CGATCTGCTCTCATCCTGAGGGGATCAGTGGCTCATAAGTCCTGTCTGCCTGCTTGCGTG | 840 |
| <b>NP 246038 Method N</b> | 781 | CGATCTGCTCTCATCCTGAGGGGATCAGTGGCTCATAAGTCCTGTCTGCCTGCTTGCGTG | 840 |

|                           |     |                                                              |     |
|---------------------------|-----|--------------------------------------------------------------|-----|
| <b>NP 246038 MiSeq</b>    | 841 | TATGGACTTGCTGTAGCCAGTGGATATGACTTTGAAAGAGAAGGATACTCTCTAGTCGGA | 900 |
| <b>NP 246038 Method A</b> | 841 | TATGGACTTGCTGTAGCCAGTGGATATGACTTTGAAAGAGAAGGATACTCTCTAGTCGGA | 900 |
| <b>NP 246038 Method S</b> | 841 | TATGGACTTGCTGTAGCCAGTGGATATGACTTTGAAAGAGAAGGATACTCTCTAGTCGGA | 900 |
| <b>NP 246038 Method E</b> | 841 | TATGGACTTGCTGTAGCCAGTGGATATGACTTTGAAAGAGAAGGATACTCTCTAGTCGGA | 900 |
| <b>NP 246038 Method K</b> | 841 | TATGGACTTGCTGTAGCCAGTGGATATGACTTTGAAAGAGAAGGATACTCTCTAGTCGGA | 900 |
| <b>NP 246038 Method N</b> | 841 | TATGGACTTGCTGTAGCCAGTGGATATGACTTTGAAAGAGAAGGATACTCTCTAGTCGGA | 900 |

|                           |     |                                                              |     |
|---------------------------|-----|--------------------------------------------------------------|-----|
| <b>NP 246038 MiSeq</b>    | 901 | ATTGATCCTTTCCGTCTGCTCCAGAACAGTCAAGTCTTCAGTCTCATCAGACCGAACGAA | 960 |
| <b>NP 246038 Method A</b> | 901 | ATTGATCCTTTCCGTCTGCTCCAGAACAGTCAAGTCTTCAGTCTCATCAGACCGAACGAA | 960 |
| <b>NP 246038 Method S</b> | 901 | ATTGATCCTTTCCGTCTGCTCCAGAACAGTCAAGTCTTCAGTCTCATCAGACCGAACGAA | 960 |
| <b>NP 246038 Method E</b> | 901 | ATTGATCCTTTCCGTCTGCTCCAGAACAGTCAAGTCTTCAGTCTCATCAGACCGAACGAA | 960 |
| <b>NP 246038 Method K</b> | 901 | ATTGATCCTTTCCGTCTGCTCCAGAACAGTCAAGTCTTCAGTCTCATCAGACCGAACGAA | 960 |
| <b>NP 246038 Method N</b> | 901 | ATTGATCCTTTCCGTCTGCTCCAGAACAGTCAAGTCTTCAGTCTCATCAGACCGAACGAA | 960 |

|                           |     |                                                              |      |
|---------------------------|-----|--------------------------------------------------------------|------|
| <b>NP 246038 MiSeq</b>    | 961 | AATCCAGCTCATAAAAGTCAGCTGATATGGATGGCATGTCACTCTGCGGCATTTGAGGAT | 1020 |
| <b>NP 246038 Method A</b> | 961 | AATCCAGCTCATAAAAGTCAGCTGATATGGATGGCATGTCACTCTGCGGCATTTGAGGAT | 1020 |
| <b>NP 246038 Method S</b> | 961 | AATCCAGCTCATAAAAGTCAGCTGATATGGATGGCATGTCACTCTGCGGCATTTGAGGAT | 1020 |
| <b>NP 246038 Method E</b> | 961 | AATCCAGCTCATAAAAGTCAGCTGATATGGATGGCATGTCACTCTGCGGCATTTGAGGAT | 1020 |
| <b>NP 246038 Method K</b> | 961 | AATCCAGCTCATAAAAGTCAGCTGATATGGATGGCATGTCACTCTGCGGCATTTGAGGAT | 1020 |
| <b>NP 246038 Method N</b> | 961 | AATCCAGCTCATAAAAGTCAGCTGATATGGATGGCATGTCACTCTGCGGCATTTGAGGAT | 1020 |

|                           |      |                                                               |      |
|---------------------------|------|---------------------------------------------------------------|------|
| <b>NP 246038 MiSeq</b>    | 1021 | CTGAGAGTGTCAAGCTTCATCAGAGGGACAAGAGTAGTCCCAAGAGGACAACCTGTCCACC | 1080 |
| <b>NP 246038 Method A</b> | 1021 | CTGAGAGTGTCAAGCTTCATCAGAGGGACAAGAGTAGTCCCAAGAGGACAACCTGTCCACC | 1080 |
| <b>NP 246038 Method S</b> | 1021 | CTGAGAGTGTCAAGCTTCATCAGAGGGACAAGAGTAGTCCCAAGAGGACAACCTGTCCACC | 1080 |
| <b>NP 246038 Method E</b> | 1021 | CTGAGAGTGTCAAGCTTCATCAGAGGGACAAGAGTAGTCCCAAGAGGACAACCTGTCCACC | 1080 |
| <b>NP 246038 Method K</b> | 1021 | CTGAGAGTGTCAAGCTTCATCAGAGGGACAAGAGTAGTCCCAAGAGGACAACCTGTCCACC | 1080 |
| <b>NP 246038 Method N</b> | 1021 | CTGAGAGTGTCAAGCTTCATCAGAGGGACAAGAGTAGTCCCAAGAGGACAACCTGTCCACC | 1080 |

|                           |      |                                                              |      |
|---------------------------|------|--------------------------------------------------------------|------|
| <b>NP 246038 MiSeq</b>    | 1081 | AGAGGAGTCCAGATTGCTTCAAATGAAAACATGGAGACAATGGACTCCAGTACTCTTGAA | 1140 |
| <b>NP 246038 Method A</b> | 1081 | AGAGGAGTCCAGATTGCTTCAAATGAAAACATGGAGACAATGGACTCCAGTACTCTTGAA | 1140 |
| <b>NP 246038 Method S</b> | 1081 | AGAGGAGTCCAGATTGCTTCAAATGAAAACATGGAGACAATGGACTCCAGTACTCTTGAA | 1140 |
| <b>NP 246038 Method E</b> | 1081 | AGAGGAGTCCAGATTGCTTCAAATGAAAACATGGAGACAATGGACTCCAGTACTCTTGAA | 1140 |
| <b>NP 246038 Method K</b> | 1081 | AGAGGAGTCCAGATTGCTTCAAATGAAAACATGGAGACAATGGACTCCAGTACTCTTGAA | 1140 |
| <b>NP 246038 Method N</b> | 1081 | AGAGGAGTCCAGATTGCTTCAAATGAAAACATGGAGACAATGGACTCCAGTACTCTTGAA | 1140 |

|                           |      |                                                              |      |
|---------------------------|------|--------------------------------------------------------------|------|
| <b>NP 246038 MiSeq</b>    | 1141 | CTGAGGAGCAGATACTGGGCTATAAGAACAAGAAGTGGAGGAAACACTAACCAACAGAGA | 1200 |
| <b>NP 246038 Method A</b> | 1141 | CTGAGGAGCAGATACTGGGCTATAAGAACAAGAAGTGGAGGAAACACTAACCAACAGAGA | 1200 |
| <b>NP 246038 Method S</b> | 1141 | CTGAGGAGCAGATACTGGGCTATAAGAACAAGAAGTGGAGGAAACACTAACCAACAGAGA | 1200 |
| <b>NP 246038 Method E</b> | 1141 | CTGAGGAGCAGATACTGGGCTATAAGAACAAGAAGTGGAGGAAACACTAACCAACAGAGA | 1200 |
| <b>NP 246038 Method K</b> | 1141 | CTGAGGAGCAGATACTGGGCTATAAGAACAAGAAGTGGAGGAAACACTAACCAACAGAGA | 1200 |
| <b>NP 246038 Method N</b> | 1141 | CTGAGGAGCAGATACTGGGCTATAAGAACAAGAAGTGGAGGAAACACTAACCAACAGAGA | 1200 |

|                           |      |                                                               |      |
|---------------------------|------|---------------------------------------------------------------|------|
| <b>NP 246038 MiSeq</b>    | 1201 | GCATCTGCAGGACAAATCAGCGTACAGCCCACATTCTCTGTGCAGAGAAACCTCCCATTCT | 1260 |
| <b>NP 246038 Method A</b> | 1201 | GCATCTGCAGGACAAATCAGCGTACAGCCCACATTCTCTGTGCAGAGAAACCTCCCATTCT | 1260 |
| <b>NP 246038 Method S</b> | 1201 | GCATCTGCAGGACAAATCAGCGTACAGCCCACATTCTCTGTGCAGAGAAACCTCCCATTCT | 1260 |
| <b>NP 246038 Method E</b> | 1201 | GCATCTGCAGGACAAATCAGCGTACAGCCCACATTCTCTGTGCAGAGAAACCTCCCATTCT | 1260 |
| <b>NP 246038 Method K</b> | 1201 | GCATCTGCAGGACAAATCAGCGTACAGCCCACATTCTCTGTGCAGAGAAACCTCCCATTCT | 1260 |
| <b>NP 246038 Method N</b> | 1201 | GCATCTGCAGGACAAATCAGCGTACAGCCCACATTCTCTGTGCAGAGAAACCTCCCATTCT | 1260 |

|                           |      |                                                              |      |
|---------------------------|------|--------------------------------------------------------------|------|
| <b>NP 246038 MiSeq</b>    | 1261 | GAGAGAGCAACCATCATGGCAGCATTTACGGGAAACACTGAAGGCAGAACTTCAGACATG | 1320 |
| <b>NP 246038 Method A</b> | 1261 | GAGAGAGCAACCATCATGGCAGCATTTACGGGAAACACTGAAGGCAGAACTTCAGACATG | 1320 |
| <b>NP 246038 Method S</b> | 1261 | GAGAGAGCAACCATCATGGCAGCATTTACGGGAAACACTGAAGGCAGAACTTCAGACATG | 1320 |
| <b>NP 246038 Method E</b> | 1261 | GAGAGAGCAACCATCATGGCAGCATTTACGGGAAACACTGAAGGCAGAACTTCAGACATG | 1320 |
| <b>NP 246038 Method K</b> | 1261 | GAGAGAGCAACCATCATGGCAGCATTTACGGGAAACACTGAAGGCAGAACTTCAGACATG | 1320 |
| <b>NP 246038 Method N</b> | 1261 | GAGAGAGCAACCATCATGGCAGCATTTACGGGAAACACTGAAGGCAGAACTTCAGACATG | 1320 |

|                           |      |                                                               |      |
|---------------------------|------|---------------------------------------------------------------|------|
| <b>NP 246038 MiSeq</b>    | 1321 | AGAAGCTGAGATCATAAGGATGATGGAAAATGCCAGACCTGAAGATGTGTCTTTCCAGGGG | 1380 |
| <b>NP 246038 Method A</b> | 1321 | AGAAGCTGAGATCATAAGGATGATGGAAAATGCCAGACCTGAAGATGTGTCTTTCCAGGGG | 1380 |
| <b>NP 246038 Method S</b> | 1321 | AGAAGCTGAGATCATAAGGATGATGGAAAATGCCAGACCTGAAGATGTGTCTTTCCAGGGG | 1380 |
| <b>NP 246038 Method E</b> | 1321 | AGAAGCTGAGATCATAAGGATGATGGAAAATGCCAGACCTGAAGATGTGTCTTTCCAGGGG | 1380 |
| <b>NP 246038 Method K</b> | 1321 | AGAAGCTGAGATCATAAGGATGATGGAAAATGCCAGACCTGAAGATGTGTCTTTCCAGGGG | 1380 |
| <b>NP 246038 Method N</b> | 1321 | AGAAGCTGAGATCATAAGGATGATGGAAAATGCCAGACCTGAAGATGTGTCTTTCCAGGGG | 1380 |

|                           |      |                                                              |      |
|---------------------------|------|--------------------------------------------------------------|------|
| <b>NP 246038 MiSeq</b>    | 1381 | CGGGGAGTCTTCGAGCTCTCGGACGAAAAGGCAACGAACCCGATCGTGCCTTCCTTTGAC | 1440 |
| <b>NP 246038 Method A</b> | 1381 | CGGGGAGTCTTCGAGCTCTCGGACGAAAAGGCAACGAACCCGATCGTGCCTTCCTTTGAC | 1440 |
| <b>NP 246038 Method S</b> | 1381 | CGGGGAGTCTTCGAGCTCTCGGACGAAAAGGCAACGAACCCGATCGTGCCTTCCTTTGAC | 1440 |
| <b>NP 246038 Method E</b> | 1381 | CGGGGAGTCTTCGAGCTCTCGGACGAAAAGGCAACGAACCCGATCGTGCCTTCCTTTGAC | 1440 |
| <b>NP 246038 Method K</b> | 1381 | CGGGGAGTCTTCGAGCTCTCGGACGAAAAGGCAACGAACCCGATCGTGCCTTCCTTTGAC | 1440 |
| <b>NP 246038 Method N</b> | 1381 | CGGGGAGTCTTCGAGCTCTCGGACGAAAAGGCAACGAACCCGATCGTGCCTTCCTTTGAC | 1440 |

|                           |      |                                                           |      |
|---------------------------|------|-----------------------------------------------------------|------|
| <b>NP 246038 MiSeq</b>    | 1441 | ATGAGCAATGAAGGATCTTATTTCTTCGGAGACAATGCAGAGGAGTATGACAATTAA | 1497 |
| <b>NP 246038 Method A</b> | 1441 | ATGAGCAATGAAGGATCTTATTTCTTCGGAGACAATGCAGAGGAGTATGACAATTAA | 1497 |
| <b>NP 246038 Method S</b> | 1441 | ATGAGCAATGAAGGATCTTATTTCTTCGGAGACAATGCAGAGGAGTATGACAATTAA | 1497 |
| <b>NP 246038 Method E</b> | 1441 | ATGAGCAATGAAGGATCTTATTTCTTCGGAGACAATGCAGAGGAGTATGACAATTAA | 1497 |
| <b>NP 246038 Method K</b> | 1441 | ATGAGCAATGAAGGATCTTATTTCTTCGGAGACAATGCAGAGGAGTATGACAATTAA | 1497 |
| <b>NP 246038 Method N</b> | 1441 | ATGAGCAATGAAGGATCTTATTTCTTCGGAGACAATGCAGAGGAGTATGACAATTAA | 1497 |
