# Supplementary material for: An Evaluation of Avian Influenza Virus Whole Genome Sequencing Approaches Using Nanopore Technology
Source: Preprints.org preprint supplement (doi:10.20944/preprints202301.0480.v1), 2023-01-26
Supplement: Supplementary file 12 [file supplementary]

## Formatted Alignments

|                            |     |                                                               |     |
|----------------------------|-----|---------------------------------------------------------------|-----|
| <b>PB2 246038 MiSeq</b>    | 1   | ATGGAGAGAATAAAAAGAACTGATAGATCTAATGTCACAGTCTCGCACTCGCGAGATACTA | 60  |
| <b>PB2 246038 Method A</b> | 1   | ATGGAGAGAATAAAAAGAACTGATAGATCTAATGTCACAGTCTCGCACTCGCGAGATACTA | 60  |
| <b>PB2 246038 Method S</b> | 1   | ATGGAGAGAATAAAAAGAACTGATAGATCTAATGTCACAGTCTCGCACTCGCGAGATACTA | 60  |
| <b>PB2 246038 Method E</b> | 1   | ATGGAGAGAATAAAAAGAACTGATAGATCTAATGTCACAGTCTCGCACTCGCGAGATACTA | 60  |
| <b>PB2 246038 Method K</b> | 1   | ATGGAGAGAATAAAAAGAACTGATAGATCTAATGTCACAGTCTCGCACTCGCGAGATACTA | 60  |
| <b>PB2 246038 Method N</b> | 1   | ATGGAGAGAATAAAAAGAACTGATAGATCTAATGTCACAGTCTCGCACTCGCGAGATACTA | 60  |
|                            |     |                                                               |     |
| <b>PB2 246038 MiSeq</b>    | 61  | ACCAAAACCACTGTTGACCACATGGCCATAATCAAGAAGTACACATCAGGAAGACAAGAA  | 120 |
| <b>PB2 246038 Method A</b> | 61  | ACCAAAACCACTGTTGACCACATGGCCATAATCAAGAAGTACACATCAGGAAGACAAGAA  | 120 |
| <b>PB2 246038 Method S</b> | 61  | ACCAAAACCACTGTTGACCACATGGCCATAATCAAGAAGTACACATCAGGAAGACAAGAA  | 120 |
| <b>PB2 246038 Method E</b> | 61  | ACCAAAACCACTGTTGACCACATGGCCATAATCAAGAAGTACACATCAGGAAGACAAGAA  | 120 |
| <b>PB2 246038 Method K</b> | 61  | ACCAAAACCACTGTTGACCACATGGCCATAATCAAGAAGTACACATCAGGAAGACAAGAA  | 120 |
| <b>PB2 246038 Method N</b> | 61  | ACCAAAACCACTGTTGACCACATGGCCATAATCAAGAAGTACACATCAGGAAGACAAGAA  | 120 |
|                            |     |                                                               |     |
| <b>PB2 246038 MiSeq</b>    | 121 | AAGAACCCTGCACTCAGAATGAAATGGATGATGGCAATGAAATATCCAATCACAGCAGAC  | 180 |
| <b>PB2 246038 Method A</b> | 121 | AAGAACCCTGCACTCAGAATGAAATGGATGATGGCAATGAAATATCCAATCACAGCAGAC  | 180 |
| <b>PB2 246038 Method S</b> | 121 | AAGAACCCTGCACTCAGAATGAAATGGATGATGGCAATGAAATATCCAATCACAGCAGAC  | 180 |
| <b>PB2 246038 Method E</b> | 121 | AAGAACCCTGCACTCAGAATGAAATGGATGATGGCAATGAAATATCCAATCACAGCAGAC  | 180 |
| <b>PB2 246038 Method K</b> | 121 | AAGAACCCTGCACTCAGAATGAAATGGATGATGGCAATGAAATATCCAATCACAGCAGAC  | 180 |
| <b>PB2 246038 Method N</b> | 121 | AAGAACCCTGCACTCAGAATGAAATGGATGATGGCAATGAAATATCCAATCACAGCAGAC  | 180 |
|                            |     |                                                               |     |
| <b>PB2 246038 MiSeq</b>    | 181 | AAGCGAATAATGGAAATGATCCCTGAAAGGAATGAACAAGGACAAACCCTCTGGAGCAAG  | 240 |
| <b>PB2 246038 Method A</b> | 181 | AAGCGAATAATGGAAATGATCCCTGAAAGGAATGAACAAGGACAAACCCTCTGGAGCAAG  | 240 |
| <b>PB2 246038 Method S</b> | 181 | AAGCGAATAATGGAAATGATCCCTGAAAGGAATGAACAAGGACAAACCCTCTGGAGCAAG  | 240 |
| <b>PB2 246038 Method E</b> | 181 | AAGCGAATAATGGAAATGATCCCTGAAAGGAATGAACAAGGACAAACCCTCTGGAGCAAG  | 240 |
| <b>PB2 246038 Method K</b> | 181 | AAGCGAATAATGGAAATGATCCCTGAAAGGAATGAACAAGGACAAACCCTCTGGAGCAAG  | 240 |
| <b>PB2 246038 Method N</b> | 181 | AAGCGAATAATGGAAATGATCCCTGAAAGGAATGAACAAGGACAAACCCTCTGGAGCAAG  | 240 |

|                     |     |                                                               |     |
|---------------------|-----|---------------------------------------------------------------|-----|
| PB2 246038 MiSeq    | 241 | ACAAATGATGCCGGATCAGATCGAGTGATGGTATCACCCCTGGCTGTGACATGGTGGAAT  | 300 |
| PB2 246038 Method A | 241 | ACAAATGATGCCGGATCAGATCGAGTGATGGTATCACCCCTGGCTGTGACATGGTGGAAT  | 300 |
| PB2 246038 Method S | 241 | ACAAATGATGCCGGATCAGATCGAGTGATGGTATCACCCCTGGCTGTGACATGGTGGAAT  | 300 |
| PB2 246038 Method E | 241 | ACAAATGATGCCGGATCAGATCGAGTGATGGTATCACCCCTGGCTGTGACATGGTGGAAT  | 300 |
| PB2 246038 Method K | 241 | ACAAATGATGCCGGATCAGATCGAGTGATGGTATCACCCCTGGCTGTGACATGGTGGAAT  | 300 |
| PB2 246038 Method N | 241 | ACAAATGATGCCGGATCAGATCGAGTGATGGTATCACCCCTGGCTGTGACATGGTGGAAT  | 300 |
|                     |     |                                                               |     |
| PB2 246038 MiSeq    | 301 | AGGAGTGGACCAACAACAAGTACAGTTCACCTATCCAAAGGTATACAAAACCTATTTTGAA | 360 |
| PB2 246038 Method A | 301 | AGGAGTGGACCAACAACAAGTACAGTTCACCTATCCAAAGGTATACAAAACCTATTTTGAA | 360 |
| PB2 246038 Method S | 301 | AGGAGTGGACCAACAACAAGTACAGTTCACCTATCCAAAGGTATACAAAACCTATTTTGAA | 360 |
| PB2 246038 Method E | 301 | AGGAGTGGACCAACAACAAGTACAGTTCACCTATCCAAAGGTATACAAAACCTATTTTGAA | 360 |
| PB2 246038 Method K | 301 | AGGAGTGGACCAACAACAAGTACAGTTCACCTATCCAAAGGTATACAAAACCTATTTTGAA | 360 |
| PB2 246038 Method N | 301 | AGGAGTGGACCAACAACAAGTACAGTTCACCTATCCAAAGGTATACAAAACCTATTTTGAA | 360 |
|                     |     |                                                               |     |
| PB2 246038 MiSeq    | 361 | AAAGTTGAAAGGTTGAAACACGGGACCTTTGGCCCTGTACACTTCAGAAACCAAGTTAAG  | 420 |
| PB2 246038 Method A | 361 | AAAGTTGAAAGGTTGAAACACGGGACCTTTGGCCCTGTACACTTCAGAAACCAAGTTAAG  | 420 |
| PB2 246038 Method S | 361 | AAAGTTGAAAGGTTGAAACACGGGACCTTTGGCCCTGTACACTTCAGAAACCAAGTTAAG  | 420 |
| PB2 246038 Method E | 361 | AAAGTTGAAAGGTTGAAACACGGGACCTTTGGCCCTGTACACTTCAGAAACCAAGTTAAG  | 420 |
| PB2 246038 Method K | 361 | AAAGTTGAAAGGTTGAAACACGGGACCTTTGGCCCTGTACACTTCAGAAACCAAGTTAAG  | 420 |
| PB2 246038 Method N | 361 | AAAGTTGAAAGGTTGAAACACGGGACCTTTGGCCCTGTACACTTCAGAAACCAAGTTAAG  | 420 |
|                     |     |                                                               |     |
| PB2 246038 MiSeq    | 421 | ATAAGACGGAGGGTCGACATAAACCCGGGGCCATGCTGACCTCAGCGCCAAAGAGGCGCAG | 480 |
| PB2 246038 Method A | 421 | ATAAGACGGAGGGTCGACATAAACCCGGGGCCATGCTGACCTCAGCGCCAAAGAGGCGCAG | 480 |
| PB2 246038 Method S | 421 | ATAAGACGGAGGGTCGACATAAACCCGGGGCCATGCTGACCTCAGCGCCAAAGAGGCGCAG | 480 |
| PB2 246038 Method E | 421 | ATAAGACGGAGGGTCGACATAAACCCGGGGCCATGCTGACCTCAGCGCCAAAGAGGCGCAG | 480 |
| PB2 246038 Method K | 421 | ATAAGACGGAGGGTCGACATAAACCCGGGGCCATGCTGACCTCAGCGCCAAAGAGGCGCAG | 480 |
| PB2 246038 Method N | 421 | ATAAGACGGAGGGTCGACATAAACCCGGGGCCATGCTGACCTCAGCGCCAAAGAGGCGCAG | 480 |
|                     |     |                                                               |     |
| PB2 246038 MiSeq    | 481 | GACGTAATCATGGAAGTTGTCTTTCCAAATGAAGTGGGAGCGAGAATACTGACGTCGGAG  | 540 |
| PB2 246038 Method A | 481 | GACGTAATCATGGAAGTTGTCTTTCCAAATGAAGTGGGAGCGAGAATACTGACGTCGGAG  | 540 |
| PB2 246038 Method S | 481 | GACGTAATCATGGAAGTTGTCTTTCCAAATGAAGTGGGAGCGAGAATACTGACGTCGGAG  | 540 |
| PB2 246038 Method E | 481 | GACGTAATCATGGAAGTTGTCTTTCCAAATGAAGTGGGAGCGAGAATACTGACGTCGGAG  | 540 |
| PB2 246038 Method K | 481 | GACGTAATCATGGAAGTTGTCTTTCCAAATGAAGTGGGAGCGAGAATACTGACGTCGGAG  | 540 |
| PB2 246038 Method N | 481 | GACGTAATCATGGAAGTTGTCTTTCCAAATGAAGTGGGAGCGAGAATACTGACGTCGGAG  | 540 |

|                            |     |                                                                |     |
|----------------------------|-----|----------------------------------------------------------------|-----|
| <b>PB2 246038 MiSeq</b>    | 541 | TCACAGTTGACAATAACAAAGGAAAAAGAAAGAAGAACTCCAGGACTGCAAAATCGCCCCCT | 600 |
| <b>PB2 246038 Method A</b> | 541 | TCACAGTTGACAATAACAAAGGAAAAAGAAAGAAGAACTCCAGGACTGCAAAATCGCCCCCT | 600 |
| <b>PB2 246038 Method S</b> | 541 | TCACAGTTGACAATAACAAAGGAAAAAGAAAGAAGAACTCCAGGACTGCAAAATCGCCCCCT | 600 |
| <b>PB2 246038 Method E</b> | 541 | TCACAGTTGACAATAACAAAGGAAAAAGAAAGAAGAACTCCAGGACTGCAAAATCGCCCCCT | 600 |
| <b>PB2 246038 Method K</b> | 541 | TCACAGTTGACAATAACAAAGGAAAAAGAAAGAAGAACTCCAGGACTGCAAAATCGCCCCCT | 600 |
| <b>PB2 246038 Method N</b> | 541 | TCACAGTTGACAATAACAAAGGAAAAAGAAAGAAGAACTCCAGGACTGCAAAATCGCCCCCT | 600 |

|                            |     |                                                                |     |
|----------------------------|-----|----------------------------------------------------------------|-----|
| <b>PB2 246038 MiSeq</b>    | 601 | CTGATGGTTGCATACATGCTAGAAAAGAGAGCTGGTCCGCAAGACAAGGTTTCCTCCCAGTG | 660 |
| <b>PB2 246038 Method A</b> | 601 | CTGATGGTTGCATACATGCTAGAAAAGAGAGCTGGTCCGCAAGACAAGGTTTCCTCCCAGTG | 660 |
| <b>PB2 246038 Method S</b> | 601 | CTGATGGTTGCATACATGCTAGAAAAGAGAGCTGGTCCGCAAGACAAGGTTTCCTCCCAGTG | 660 |
| <b>PB2 246038 Method E</b> | 601 | CTGATGGTTGCATACATGCTAGAAAAGAGAGCTGGTCCGCAAGACAAGGTTTCCTCCCAGTG | 660 |
| <b>PB2 246038 Method K</b> | 601 | CTGATGGTTGCATACATGCTAGAAAAGAGAGCTGGTCCGCAAGACAAGGTTTCCTCCCAGTG | 660 |
| <b>PB2 246038 Method N</b> | 601 | CTGATGGTTGCATACATGCTAGAAAAGAGAGCTGGTCCGCAAGACAAGGTTTCCTCCCAGTG | 660 |

|                            |     |                                                              |     |
|----------------------------|-----|--------------------------------------------------------------|-----|
| <b>PB2 246038 MiSeq</b>    | 661 | GCTGGTGGAACAAGCAGTGTCTACATTGAGGTGCTGCATTTGACCCAGGGAACATGCTGG | 720 |
| <b>PB2 246038 Method A</b> | 661 | GCTGGTGGAACAAGCAGTGTCTACATTGAGGTGCTGCATTTGACCCAGGGAACATGCTGG | 720 |
| <b>PB2 246038 Method S</b> | 661 | GCTGGTGGAACAAGCAGTGTCTACATTGAGGTGCTGCATTTGACCCAGGGAACATGCTGG | 720 |
| <b>PB2 246038 Method E</b> | 661 | GCTGGTGGAACAAGCAGTGTCTACATTGAGGTGCTGCATTTGACCCAGGGAACATGCTGG | 720 |
| <b>PB2 246038 Method K</b> | 661 | GCTGGTGGAACAAGCAGTGTCTACATTGAGGTGCTGCATTTGACCCAGGGAACATGCTGG | 720 |
| <b>PB2 246038 Method N</b> | 661 | GCTGGTGGAACAAGCAGTGTCTACATTGAGGTGCTGCATTTGACCCAGGGAACATGCTGG | 720 |

|                            |     |                                                              |     |
|----------------------------|-----|--------------------------------------------------------------|-----|
| <b>PB2 246038 MiSeq</b>    | 721 | GAGCAGATGTATACTCCAGGAGGAGAAGTGAGAAACGATGATGTAGACCAGAGCTTAATC | 780 |
| <b>PB2 246038 Method A</b> | 721 | GAGCAGATGTATACTCCAGGAGGAGAAGTGAGAAACGATGATGTAGACCAGAGCTTAATC | 780 |
| <b>PB2 246038 Method S</b> | 721 | GAGCAGATGTATACTCCAGGAGGAGAAGTGAGAAACGATGATGTAGACCAGAGCTTAATC | 780 |
| <b>PB2 246038 Method E</b> | 721 | GAGCAGATGTATACTCCAGGAGGAGAAGTGAGAAACGATGATGTAGACCAGAGCTTAATC | 780 |
| <b>PB2 246038 Method K</b> | 721 | GAGCAGATGTATACTCCAGGAGGAGAAGTGAGAAACGATGATGTAGACCAGAGCTTAATC | 780 |
| <b>PB2 246038 Method N</b> | 721 | GAGCAGATGTATACTCCAGGAGGAGAAGTGAGAAACGATGATGTAGACCAGAGCTTAATC | 780 |

|                            |     |                                                              |     |
|----------------------------|-----|--------------------------------------------------------------|-----|
| <b>PB2 246038 MiSeq</b>    | 781 | ATTGCTGCCCGGAATATAGTAAGAAGAGCAACAGTGTCAGCAGACCCATTAGCATCTCTA | 840 |
| <b>PB2 246038 Method A</b> | 781 | ATTGCTGCCCGGAATATAGTAAGAAGAGCAACAGTGTCAGCAGACCCATTAGCATCTCTA | 840 |
| <b>PB2 246038 Method S</b> | 781 | ATTGCTGCCCGGAATATAGTAAGAAGAGCAACAGTGTCAGCAGACCCATTAGCATCTCTA | 840 |
| <b>PB2 246038 Method E</b> | 781 | ATTGCTGCCCGGAATATAGTAAGAAGAGCAACAGTGTCAGCAGACCCATTAGCATCTCTA | 840 |
| <b>PB2 246038 Method K</b> | 781 | ATTGCTGCCCGGAATATAGTAAGAAGAGCAACAGTGTCAGCAGACCCATTAGCATCTCTA | 840 |
| <b>PB2 246038 Method N</b> | 781 | ATTGCTGCCCGGAATATAGTAAGAAGAGCAACAGTGTCAGCAGACCCATTAGCATCTCTA | 840 |

|                            |      |                                                               |      |
|----------------------------|------|---------------------------------------------------------------|------|
| <b>PB2 246038 MiSeq</b>    | 841  | TTGGAGATGTGCCACAGCACACAAAATTGGAGGAATAAGGATGGTAGACATTCTTCGGCAA | 900  |
| <b>PB2 246038 Method A</b> | 841  | TTGGAGATGTGCCACAGCACACAAAATTGGAGGAATAAGGATGGTAGACATTCTTCGGCAA | 900  |
| <b>PB2 246038 Method S</b> | 841  | TTGGAGATGTGCCACAGCACACAAAATTGGAGGAATAAGGATGGTAGACATTCTTCGGCAA | 900  |
| <b>PB2 246038 Method E</b> | 841  | TTGGAGATGTGCCACAGCACACAAAATTGGAGGAATAAGGATGGTAGACATTCTTCGGCAA | 900  |
| <b>PB2 246038 Method K</b> | 841  | TTGGAGATGTGCCACAGCACACAAAATTGGAGGAATAAGGATGGTAGACATTCTTCGGCAA | 900  |
| <b>PB2 246038 Method N</b> | 841  | TTGGAGATGTGCCACAGCACACAAAATTGGAGGAATAAGGATGGTAGACATTCTTCGGCAA | 900  |
|                            |      |                                                               |      |
| <b>PB2 246038 MiSeq</b>    | 901  | AATCCAACGGAGGAACAAGCCGTGGACATATGCAAGGCAGCAATGGGCTTGAGGATTAGC  | 960  |
| <b>PB2 246038 Method A</b> | 901  | AATCCAACGGAGGAACAAGCCGTGGACATATGCAAGGCAGCAATGGGCTTGAGGATTAGC  | 960  |
| <b>PB2 246038 Method S</b> | 901  | AATCCAACGGAGGAACAAGCCGTGGACATATGCAAGGCAGCAATGGGCTTGAGGATTAGC  | 960  |
| <b>PB2 246038 Method E</b> | 901  | AATCCAACGGAGGAACAAGCCGTGGACATATGCAAGGCAGCAATGGGCTTGAGGATTAGC  | 960  |
| <b>PB2 246038 Method K</b> | 901  | AATCCAACGGAGGAACAAGCCGTGGACATATGCAAGGCAGCAATGGGCTTGAGGATTAGC  | 960  |
| <b>PB2 246038 Method N</b> | 901  | AATCCAACGGAGGAACAAGCCGTGGACATATGCAAGGCAGCAATGGGCTTGAGGATTAGC  | 960  |
|                            |      |                                                               |      |
| <b>PB2 246038 MiSeq</b>    | 961  | TCATCGTTTCAGCTTTGGTGGATTCACTTTTAAAAGAACAAGTGGATCGTCAATCAAAAGG | 1020 |
| <b>PB2 246038 Method A</b> | 961  | TCATCGTTTCAGCTTTGGTGGATTCACTTTTAAAAGAACAAGTGGATCGTCAATCAAAAGG | 1020 |
| <b>PB2 246038 Method S</b> | 961  | TCATCGTTTCAGCTTTGGTGGATTCACTTTTAAAAGAACAAGTGGATCGTCAATCAAAAGG | 1020 |
| <b>PB2 246038 Method E</b> | 961  | TCATCGTTTCAGCTTTGGTGGATTCACTTTTAAAAGAACAAGTGGATCGTCAATCAAAAGG | 1020 |
| <b>PB2 246038 Method K</b> | 961  | TCATCGTTTCAGCTTTGGTGGATTCACTTTTAAAAGAACAAGTGGATCGTCAATCAAAAGG | 1020 |
| <b>PB2 246038 Method N</b> | 961  | TCATCGTTTCAGCTTTGGTGGATTCACTTTTAAAAGAACAAGTGGATCGTCAATCAAAAGG | 1020 |
|                            |      |                                                               |      |
| <b>PB2 246038 MiSeq</b>    | 1021 | GAAGAAGAGGTGCTTACGGGCAACCTTCAAACATTGAAAATAAGAGTACATGAGGGGTAT  | 1080 |
| <b>PB2 246038 Method A</b> | 1021 | GAAGAAGAGGTGCTTACGGGCAACCTTCAAACATTGAAAATAAGAGTACATGAGGGGTAT  | 1080 |
| <b>PB2 246038 Method S</b> | 1021 | GAAGAAGAGGTGCTTACGGGCAACCTTCAAACATTGAAAATAAGAGTACATGAGGGGTAT  | 1080 |
| <b>PB2 246038 Method E</b> | 1021 | GAAGAAGAGGTGCTTACGGGCAACCTTCAAACATTGAAAATAAGAGTACATGAGGGGTAT  | 1080 |
| <b>PB2 246038 Method K</b> | 1021 | GAAGAAGAGGTGCTTACGGGCAACCTTCAAACATTGAAAATAAGAGTACATGAGGGGTAT  | 1080 |
| <b>PB2 246038 Method N</b> | 1021 | GAAGAAGAGGTGCTTACGGGCAACCTTCAAACATTGAAAATAAGAGTACATGAGGGGTAT  | 1080 |
|                            |      |                                                               |      |
| <b>PB2 246038 MiSeq</b>    | 1081 | GAAGAGTTCACTATGGTTGGAAGAAGAGCAACGGCCATCCTCAGGAAAGCAACCAGAAGG  | 1140 |
| <b>PB2 246038 Method A</b> | 1081 | GAAGAGTTCACTATGGTTGGAAGAAGAGCAACGGCCATCCTCAGGAAAGCAACCAGAAGG  | 1140 |
| <b>PB2 246038 Method S</b> | 1081 | GAAGAGTTCACTATGGTTGGAAGAAGAGCAACGGCCATCCTCAGGAAAGCAACCAGAAGG  | 1140 |
| <b>PB2 246038 Method E</b> | 1081 | GAAGAGTTCACTATGGTTGGAAGAAGAGCAACGGCCATCCTCAGGAAAGCAACCAGAAGG  | 1140 |
| <b>PB2 246038 Method K</b> | 1081 | GAAGAGTTCACTATGGTTGGAAGAAGAGCAACGGCCATCCTCAGGAAAGCAACCAGAAGG  | 1140 |
| <b>PB2 246038 Method N</b> | 1081 | GAAGAGTTCACTATGGTTGGAAGAAGAGCAACGGCCATCCTCAGGAAAGCAACCAGAAGG  | 1140 |

|                            |      |                                                               |      |
|----------------------------|------|---------------------------------------------------------------|------|
| <b>PB2 246038 MiSeq</b>    | 1141 | CTGATCCAGCTAATAGTAAGTGGGAAGGGACGAACAGTCAATTGCTGAAGCAATAATCGTG | 1200 |
| <b>PB2 246038 Method A</b> | 1141 | CTGATCCAGCTAATAGTAAGTGGGAAGGGACGAACAGTCAATTGCTGAAGCAATAATCGTG | 1200 |
| <b>PB2 246038 Method S</b> | 1141 | CTGATCCAGCTAATAGTAAGTGGGAAGGGACGAACAGTCAATTGCTGAAGCAATAATCGTG | 1200 |
| <b>PB2 246038 Method E</b> | 1141 | CTGATCCAGCTAATAGTAAGTGGGAAGGGACGAACAGTCAATTGCTGAAGCAATAATCGTG | 1200 |
| <b>PB2 246038 Method K</b> | 1141 | CTGATCCAGCTAATAGTAAGTGGGAAGGGACGAACAGTCAATTGCTGAAGCAATAATCGTG | 1200 |
| <b>PB2 246038 Method N</b> | 1141 | CTGATCCAGCTAATAGTAAGTGGGAAGGGACGAACAGTCAATTGCTGAAGCAATAATCGTG | 1200 |

|                            |      |                                                              |      |
|----------------------------|------|--------------------------------------------------------------|------|
| <b>PB2 246038 MiSeq</b>    | 1201 | GCCATGGTATTCTCACAAGAGGACTGCATGATAAAGGCAGTTCGAGGTGATCTGAACTTT | 1260 |
| <b>PB2 246038 Method A</b> | 1201 | GCCATGGTATTCTCACAAGAGGACTGCATGATAAAGGCAGTTCGAGGTGATCTGAACTTT | 1260 |
| <b>PB2 246038 Method S</b> | 1201 | GCCATGGTATTCTCACAAGAGGACTGCATGATAAAGGCAGTTCGAGGTGATCTGAACTTT | 1260 |
| <b>PB2 246038 Method E</b> | 1201 | GCCATGGTATTCTCACAAGAGGACTGCATGATAAAGGCAGTTCGAGGTGATCTGAACTTT | 1260 |
| <b>PB2 246038 Method K</b> | 1201 | GCCATGGTATTCTCACAAGAGGACTGCATGATAAAGGCAGTTCGAGGTGATCTGAACTTT | 1260 |
| <b>PB2 246038 Method N</b> | 1201 | GCCATGGTATTCTCACAAGAGGACTGCATGATAAAGGCAGTTCGAGGTGATCTGAACTTT | 1260 |

|                            |      |                                                              |      |
|----------------------------|------|--------------------------------------------------------------|------|
| <b>PB2 246038 MiSeq</b>    | 1261 | GTCAATAGAGCGAATCAGCGGCTGAATCCAATGCATCAGCTCTTGAGACACTTCCAAAAG | 1320 |
| <b>PB2 246038 Method A</b> | 1261 | GTCAATAGAGCGAATCAGCGGCTGAATCCAATGCATCAGCTCTTGAGACACTTCCAAAAG | 1320 |
| <b>PB2 246038 Method S</b> | 1261 | GTCAATAGAGCGAATCAGCGGCTGAATCCAATGCATCAGCTCTTGAGACACTTCCAAAAG | 1320 |
| <b>PB2 246038 Method E</b> | 1261 | GTCAATAGAGCGAATCAGCGGCTGAATCCAATGCATCAGCTCTTGAGACACTTCCAAAAG | 1320 |
| <b>PB2 246038 Method K</b> | 1261 | GTCAATAGAGCGAATCAGCGGCTGAATCCAATGCATCAGCTCTTGAGACACTTCCAAAAG | 1320 |
| <b>PB2 246038 Method N</b> | 1261 | GTCAATAGAGCGAATCAGCGGCTGAATCCAATGCATCAGCTCTTGAGACACTTCCAAAAG | 1320 |

|                            |      |                                                                |      |
|----------------------------|------|----------------------------------------------------------------|------|
| <b>PB2 246038 MiSeq</b>    | 1321 | GATGCAAAAAGTGCTTTTCCAAAATTGGGGGAATTGAGCCCATTGACAATGTGATGGGAATG | 1380 |
| <b>PB2 246038 Method A</b> | 1321 | GATGCAAAAAGTGCTTTTCCAAAATTGGGGGAATTGAGCCCATTGACAATGTGATGGGAATG | 1380 |
| <b>PB2 246038 Method S</b> | 1321 | GATGCAAAAAGTGCTTTTCCAAAATTGGGGGAATTGAGCCCATTGACAATGTGATGGGAATG | 1380 |
| <b>PB2 246038 Method E</b> | 1321 | GATGCAAAAAGTGCTTTTCCAAAATTGGGGGAATTGAGCCCATTGACAATGTGATGGGAATG | 1380 |
| <b>PB2 246038 Method K</b> | 1321 | GATGCAAAAAGTGCTTTTCCAAAATTGGGGGAATTGAGCCCATTGACAATGTGATGGGAATG | 1380 |
| <b>PB2 246038 Method N</b> | 1321 | GATGCAAAAAGTGCTTTTCCAAAATTGGGGGAATTGAGCCCATTGACAATGTGATGGGAATG | 1380 |

|                            |      |                                                              |      |
|----------------------------|------|--------------------------------------------------------------|------|
| <b>PB2 246038 MiSeq</b>    | 1381 | ATCGGGATATTGCCTGACATGACTCCAAGTACTGAGATGTCACTGAGGGGAATAAGAGTC | 1440 |
| <b>PB2 246038 Method A</b> | 1381 | ATCGGGATATTGCCTGACATGACTCCAAGTACTGAGATGTCACTGAGGGGAATAAGAGTC | 1440 |
| <b>PB2 246038 Method S</b> | 1381 | ATCGGGATATTGCCTGACATGACTCCAAGTACTGAGATGTCACTGAGGGGAATAAGAGTC | 1440 |
| <b>PB2 246038 Method E</b> | 1381 | ATCGGGATATTGCCTGACATGACTCCAAGTACTGAGATGTCACTGAGGGGAATAAGAGTC | 1440 |
| <b>PB2 246038 Method K</b> | 1381 | ATCGGGATATTGCCTGACATGACTCCAAGTACTGAGATGTCACTGAGGGGAATAAGAGTC | 1440 |
| <b>PB2 246038 Method N</b> | 1381 | ATCGGGATATTGCCTGACATGACTCCAAGTACTGAGATGTCACTGAGGGGAATAAGAGTC | 1440 |

|                            |      |                                                              |      |
|----------------------------|------|--------------------------------------------------------------|------|
| <b>PB2 246038 MiSeq</b>    | 1441 | AGTAAGATGGGAGTAGATGAATACTCCAGTACAGAGCGGGTAGTAGTAAGCATCGATCGA | 1500 |
| <b>PB2 246038 Method A</b> | 1441 | AGTAAGATGGGAGTAGATGAATACTCCAGTACAGAGCGGGTAGTAGTAAGCATCGATCGA | 1500 |
| <b>PB2 246038 Method S</b> | 1441 | AGTAAGATGGGAGTAGATGAATACTCCAGTACAGAGCGGGTAGTAGTAAGCATCGATCGA | 1500 |
| <b>PB2 246038 Method E</b> | 1441 | AGTAAGATGGGAGTAGATGAATACTCCAGTACAGAGCGGGTAGTAGTAAGCATCGATCGA | 1500 |
| <b>PB2 246038 Method K</b> | 1441 | AGTAAGATGGGAGTAGATGAATACTCCAGTACAGAGCGGGTAGTAGTAAGCATCGATCGA | 1500 |
| <b>PB2 246038 Method N</b> | 1441 | AGTAAGATGGGAGTAGATGAATACTCCAGTACAGAGCGGGTAGTAGTAAGCATCGATCGA | 1500 |

|                            |      |                                                              |      |
|----------------------------|------|--------------------------------------------------------------|------|
| <b>PB2 246038 MiSeq</b>    | 1501 | TTTTTAAGAGTTCGAGACCAACGGGGGAGCGTACTACTGTCACCCGAAGAAGTCAGCGAG | 1560 |
| <b>PB2 246038 Method A</b> | 1501 | TTTTTAAGAGTTCGAGACCAACGGGGGAGCGTACTACTGTCACCCGAAGAAGTCAGCGAG | 1560 |
| <b>PB2 246038 Method S</b> | 1501 | TTTTTAAGAGTTCGAGACCAACGGGGGAGCGTACTACTGTCACCCGAAGAAGTCAGCGAG | 1560 |
| <b>PB2 246038 Method E</b> | 1501 | TTTTTAAGAGTTCGAGACCAACGGGGGAGCGTACTACTGTCACCCGAAGAAGTCAGCGAG | 1560 |
| <b>PB2 246038 Method K</b> | 1501 | TTTTTAAGAGTTCGAGACCAACGGGGGAGCGTACTACTGTCACCCGAAGAAGTCAGCGAG | 1560 |
| <b>PB2 246038 Method N</b> | 1501 | TTTTTAAGAGTTCGAGACCAACGGGGGAGCGTACTACTGTCACCCGAAGAAGTCAGCGAG | 1560 |

|                            |      |                                                              |      |
|----------------------------|------|--------------------------------------------------------------|------|
| <b>PB2 246038 MiSeq</b>    | 1561 | ACACAAGGAACAGAGAAATTGACAATCACTTATTCGTCATCAATGATGTGGGAGATCAAT | 1620 |
| <b>PB2 246038 Method A</b> | 1561 | ACACAAGGAACAGAGAAATTGACAATCACTTATTCGTCATCAATGATGTGGGAGATCAAT | 1620 |
| <b>PB2 246038 Method S</b> | 1561 | ACACAAGGAACAGAGAAATTGACAATCACTTATTCGTCATCAATGATGTGGGAGATCAAT | 1620 |
| <b>PB2 246038 Method E</b> | 1561 | ACACAAGGAACAGAGAAATTGACAATCACTTATTCGTCATCAATGATGTGGGAGATCAAT | 1620 |
| <b>PB2 246038 Method K</b> | 1561 | ACACAAGGAACAGAGAAATTGACAATCACTTATTCGTCATCAATGATGTGGGAGATCAAT | 1620 |
| <b>PB2 246038 Method N</b> | 1561 | ACACAAGGAACAGAGAAATTGACAATCACTTATTCGTCATCAATGATGTGGGAGATCAAT | 1620 |

|                            |      |                                                              |      |
|----------------------------|------|--------------------------------------------------------------|------|
| <b>PB2 246038 MiSeq</b>    | 1621 | GGTCCTGAGTCGGTGTTGGTCAATACTTATCAGTGGATAATCAGAAACTGGGAAACAGTA | 1680 |
| <b>PB2 246038 Method A</b> | 1621 | GGTCCTGAGTCGGTGTTGGTCAATACTTATCAGTGGATAATCAGAAACTGGGAAACAGTA | 1680 |
| <b>PB2 246038 Method S</b> | 1621 | GGTCCTGAGTCGGTGTTGGTCAATACTTATCAGTGGATAATCAGAAACTGGGAAACAGTA | 1680 |
| <b>PB2 246038 Method E</b> | 1621 | GGTCCTGAGTCGGTGTTGGTCAATACTTATCAGTGGATAATCAGAAACTGGGAAACAGTA | 1680 |
| <b>PB2 246038 Method K</b> | 1621 | GGTCCTGAGTCGGTGTTGGTCAATACTTATCAGTGGATAATCAGAAACTGGGAAACAGTA | 1680 |
| <b>PB2 246038 Method N</b> | 1621 | GGTCCTGAGTCGGTGTTGGTCAATACTTATCAGTGGATAATCAGAAACTGGGAAACAGTA | 1680 |

|                            |      |                                                              |      |
|----------------------------|------|--------------------------------------------------------------|------|
| <b>PB2 246038 MiSeq</b>    | 1681 | AAAATTCAATGGTCACAAGATCCCACAATGTTGTATAATAAGATGGAGTTCGAGCCATTC | 1740 |
| <b>PB2 246038 Method A</b> | 1681 | AAAATTCAATGGTCACAAGATCCCACAATGTTGTATAATAAGATGGAGTTCGAGCCATTC | 1740 |
| <b>PB2 246038 Method S</b> | 1681 | AAAATTCAATGGTCACAAGATCCCACAATGTTGTATAATAAGATGGAGTTCGAGCCATTC | 1740 |
| <b>PB2 246038 Method E</b> | 1681 | AAAATTCAATGGTCACAAGATCCCACAATGTTGTATAATAAGATGGAGTTCGAGCCATTC | 1740 |
| <b>PB2 246038 Method K</b> | 1681 | AAAATTCAATGGTCACAAGATCCCACAATGTTGTATAATAAGATGGAGTTCGAGCCATTC | 1740 |
| <b>PB2 246038 Method N</b> | 1681 | AAAATTCAATGGTCACAAGATCCCACAATGTTGTATAATAAGATGGAGTTCGAGCCATTC | 1740 |

|                            |      |                                                               |      |
|----------------------------|------|---------------------------------------------------------------|------|
| <b>PB2 246038 MiSeq</b>    | 1741 | CAGTCTCTGGTCCCTAAGGCAGCCAGGGGTCAATACAGTGGGTTTCGTGAGGACACTATTT | 1800 |
| <b>PB2 246038 Method A</b> | 1741 | CAGTCTCTGGTCCCTAAGGCAGCCAGGGGTCAATACAGTGGGTTTCGTGAGGACACTATTT | 1800 |
| <b>PB2 246038 Method S</b> | 1741 | CAGTCTCTGGTCCCTAAGGCAGCCAGGGGTCAATACAGTGGGTTTCGTGAGGACACTATTT | 1800 |
| <b>PB2 246038 Method E</b> | 1741 | CAGTCTCTGGTCCCTAAGGCAGCCAGGGGTCAATACAGTGGGTTTCGTGAGGACACTATTT | 1800 |
| <b>PB2 246038 Method K</b> | 1741 | CAGTCTCTGGTCCCTAAGGCAGCCAGGGGTCAATACAGTGGGTTTCGTGAGGACACTATTT | 1800 |
| <b>PB2 246038 Method N</b> | 1741 | CAGTCTCTGGTCCCTAAGGCAGCCAGGGGTCAATACAGTGGGTTTCGTGAGGACACTATTT | 1800 |

|                            |      |                                                              |      |
|----------------------------|------|--------------------------------------------------------------|------|
| <b>PB2 246038 MiSeq</b>    | 1801 | CAGCAAATGCGAGATGTGCTTGGAACATTTGACACTGTTTCAGATAATAAACTTCTCCCC | 1860 |
| <b>PB2 246038 Method A</b> | 1801 | CAGCAAATGCGAGATGTGCTTGGAACATTTGACACTGTTTCAGATAATAAACTTCTCCCC | 1860 |
| <b>PB2 246038 Method S</b> | 1801 | CAGCAAATGCGAGATGTGCTTGGAACATTTGACACTGTTTCAGATAATAAACTTCTCCCC | 1860 |
| <b>PB2 246038 Method E</b> | 1801 | CAGCAAATGCGAGATGTGCTTGGAACATTTGACACTGTTTCAGATAATAAACTTCTCCCC | 1860 |
| <b>PB2 246038 Method K</b> | 1801 | CAGCAAATGCGAGATGTGCTTGGAACATTTGACACTGTTTCAGATAATAAACTTCTCCCC | 1860 |
| <b>PB2 246038 Method N</b> | 1801 | CAGCAAATGCGAGATGTGCTTGGAACATTTGACACTGTTTCAGATAATAAACTTCTCCCC | 1860 |

|                            |      |                                                              |      |
|----------------------------|------|--------------------------------------------------------------|------|
| <b>PB2 246038 MiSeq</b>    | 1861 | TTTGCTGCTGCCCCACCGGAACAAAGTAGGATGCAATTCTCCTCTCTGACTGTGAATGTG | 1920 |
| <b>PB2 246038 Method A</b> | 1861 | TTTGCTGCTGCCCCACCGGAACAAAGTAGGATGCAATTCTCCTCTCTGACTGTGAATGTG | 1920 |
| <b>PB2 246038 Method S</b> | 1861 | TTTGCTGCTGCCCCACCGGAACAAAGTAGGATGCAATTCTCCTCTCTGACTGTGAATGTG | 1920 |
| <b>PB2 246038 Method E</b> | 1861 | TTTGCTGCTGCCCCACCGGAACAAAGTAGGATGCAATTCTCCTCTCTGACTGTGAATGTG | 1920 |
| <b>PB2 246038 Method K</b> | 1861 | TTTGCTGCTGCCCCACCGGAACAAAGTAGGATGCAATTCTCCTCTCTGACTGTGAATGTG | 1920 |
| <b>PB2 246038 Method N</b> | 1861 | TTTGCTGCTGCCCCACCGGAACAAAGTAGGATGCAATTCTCCTCTCTGACTGTGAATGTG | 1920 |

|                            |      |                                                              |      |
|----------------------------|------|--------------------------------------------------------------|------|
| <b>PB2 246038 MiSeq</b>    | 1921 | AGAGGATCAGGAATGAGAATACTGGTAAGAGGCAATTCTCCAGTGTTCAATTACAACAAG | 1980 |
| <b>PB2 246038 Method A</b> | 1921 | AGAGGATCAGGAATGAGAATACTGGTAAGAGGCAATTCTCCAGTGTTCAATTACAACAAG | 1980 |
| <b>PB2 246038 Method S</b> | 1921 | AGAGGATCAGGAATGAGAATACTGGTAAGAGGCAATTCTCCAGTGTTCAATTACAACAAG | 1980 |
| <b>PB2 246038 Method E</b> | 1921 | AGAGGATCAGGAATGAGAATACTGGTAAGAGGCAATTCTCCAGTGTTCAATTACAACAAG | 1980 |
| <b>PB2 246038 Method K</b> | 1921 | AGAGGATCAGGAATGAGAATACTGGTAAGAGGCAATTCTCCAGTGTTCAATTACAACAAG | 1980 |
| <b>PB2 246038 Method N</b> | 1921 | AGAGGATCAGGAATGAGAATACTGGTAAGAGGCAATTCTCCAGTGTTCAATTACAACAAG | 1980 |

|                            |      |                                                              |      |
|----------------------------|------|--------------------------------------------------------------|------|
| <b>PB2 246038 MiSeq</b>    | 1981 | GCCACCAAGAGGCTCACAATTCTCGGGAAAGATGCAGGTGCATTGACCGAAGACCCAGAT | 2040 |
| <b>PB2 246038 Method A</b> | 1981 | GCCACCAAGAGGCTCACAATTCTCGGGAAAGATGCAGGTGCATTGACCGAAGACCCAGAT | 2040 |
| <b>PB2 246038 Method S</b> | 1981 | GCCACCAAGAGGCTCACAATTCTCGGGAAAGATGCAGGTGCATTGACCGAAGACCCAGAT | 2040 |
| <b>PB2 246038 Method E</b> | 1981 | GCCACCAAGAGGCTCACAATTCTCGGGAAAGATGCAGGTGCATTGACCGAAGACCCAGAT | 2040 |
| <b>PB2 246038 Method K</b> | 1981 | GCCACCAAGAGGCTCACAATTCTCGGGAAAGATGCAGGTGCATTGACCGAAGACCCAGAT | 2040 |
| <b>PB2 246038 Method N</b> | 1981 | GCCACCAAGAGGCTCACAATTCTCGGGAAAGATGCAGGTGCATTGACCGAAGACCCAGAT | 2040 |

|                            |      |                                                               |      |
|----------------------------|------|---------------------------------------------------------------|------|
| <b>PB2 246038 MiSeq</b>    | 2041 | GAAGGCACAGCTGGAGTGGAGTCTGCTGTTTTAAGAGGATTTCCTCATTTTGGGCAAAGAA | 2100 |
| <b>PB2 246038 Method A</b> | 2041 | GAAGGCACAGCTGGAGTGGAGTCTGCTGTTTTAAGAGGATTTCCTCATTTTGGGCAAAGAA | 2100 |
| <b>PB2 246038 Method S</b> | 2041 | GAAGGCACAGCTGGAGTGGAGTCTGCTGTTTTAAGAGGATTTCCTCATTTTGGGCAAAGAA | 2100 |
| <b>PB2 246038 Method E</b> | 2041 | GAAGGCACAGCTGGAGTGGAGTCTGCTGTTTTAAGAGGATTTCCTCATTTTGGGCAAAGAA | 2100 |
| <b>PB2 246038 Method K</b> | 2041 | GAAGGCACAGCTGGAGTGGAGTCTGCTGTTTTAAGAGGATTTCCTCATTTTGGGCAAAGAA | 2100 |
| <b>PB2 246038 Method N</b> | 2041 | GAAGGCACAGCTGGAGTGGAGTCTGCTGTTTTAAGAGGATTTCCTCATTTTGGGCAAAGAA | 2100 |

|                            |      |                                                              |      |
|----------------------------|------|--------------------------------------------------------------|------|
| <b>PB2 246038 MiSeq</b>    | 2101 | GACAAGAGATATGGCCCAGCACTGAGCATCAATGAGCTGAGCAATTTGGCAAAGGGAGAG | 2160 |
| <b>PB2 246038 Method A</b> | 2101 | GACAAGAGATATGGCCCAGCACTGAGCATCAATGAGCTGAGCAATTTGGCAAAGGGAGAG | 2160 |
| <b>PB2 246038 Method S</b> | 2101 | GACAAGAGATATGGCCCAGCACTGAGCATCAATGAGCTGAGCAATTTGGCAAAGGGAGAG | 2160 |
| <b>PB2 246038 Method E</b> | 2101 | GACAAGAGATATGGCCCAGCACTGAGCATCAATGAGCTGAGCAATTTGGCAAAGGGAGAG | 2160 |
| <b>PB2 246038 Method K</b> | 2101 | GACAAGAGATATGGCCCAGCACTGAGCATCAATGAGCTGAGCAATTTGGCAAAGGGAGAG | 2160 |
| <b>PB2 246038 Method N</b> | 2101 | GACAAGAGATATGGCCCAGCACTGAGCATCAATGAGCTGAGCAATTTGGCAAAGGGAGAG | 2160 |

|                            |      |                                                              |      |
|----------------------------|------|--------------------------------------------------------------|------|
| <b>PB2 246038 MiSeq</b>    | 2161 | AAGGCTAATGTGCTAATTGGGCAAGGAGACGTGGTGTTGGTGATGAAACGGAAACGGGAC | 2220 |
| <b>PB2 246038 Method A</b> | 2161 | AAGGCTAATGTGCTAATTGGGCAAGGAGACGTGGTGTTGGTGATGAAACGGAAACGGGAC | 2220 |
| <b>PB2 246038 Method S</b> | 2161 | AAGGCTAATGTGCTAATTGGGCAAGGAGACGTGGTGTTGGTGATGAAACGGAAACGGGAC | 2220 |
| <b>PB2 246038 Method E</b> | 2161 | AAGGCTAATGTGCTAATTGGGCAAGGAGACGTGGTGTTGGTGATGAAACGGAAACGGGAC | 2220 |
| <b>PB2 246038 Method K</b> | 2161 | AAGGCTAATGTGCTAATTGGGCAAGGAGACGTGGTGTTGGTGATGAAACGGAAACGGGAC | 2220 |
| <b>PB2 246038 Method N</b> | 2161 | AAGGCTAATGTGCTAATTGGGCAAGGAGACGTGGTGTTGGTGATGAAACGGAAACGGGAC | 2220 |

|                            |      |                                                              |      |
|----------------------------|------|--------------------------------------------------------------|------|
| <b>PB2 246038 MiSeq</b>    | 2221 | TCTAGCATACTTACTGACAGCCAGACAGCGACCAAAAGAATTCGGATGGCCATCAATTAG | 2280 |
| <b>PB2 246038 Method A</b> | 2221 | TCTAGCATACTTACTGACAGCCAGACAGCGACCAAAAGAATTCGGATGGCCATCAATTAG | 2280 |
| <b>PB2 246038 Method S</b> | 2221 | TCTAGCATACTTACTGACAGCCAGACAGCGACCAAAAGAATTCGGATGGCCATCAATTAG | 2280 |
| <b>PB2 246038 Method E</b> | 2221 | TCTAGCATACTTACTGACAGCCAGACAGCGACCAAAAGAATTCGGATGGCCATCAATTAG | 2280 |
| <b>PB2 246038 Method K</b> | 2221 | TCTAGCATACTTACTGACAGCCAGACAGCGACCAAAAGAATTCGGATGGCCATCAATTAG | 2280 |
| <b>PB2 246038 Method N</b> | 2221 | TCTAGCATACTTACTGACAGCCAGACAGCGACCAAAAGAATTCGGATGGCCATCAATTAG | 2280 |
