# Supplementary material for: An Evaluation of Avian Influenza Virus Whole Genome Sequencing Approaches Using Nanopore Technology
Source: Preprints.org preprint supplement (doi:10.20944/preprints202301.0480.v1), 2023-01-26
Supplement: Supplementary file 14 [file supplementary]

## Formatted Alignments

|                     |     |                                                                  |     |
|---------------------|-----|------------------------------------------------------------------|-----|
| PB2 245467 MiSeq    | 1   | ATGGAGAGAATAAGAGAACTAAGAGATCTAATGTCACAGTCTCGCACTCGCGAGATACTC     | 60  |
| PB2 245467 Method A | 1   | ATGGAGAGAATAAGAGAACTAAGAGATCTAATGTCACAGTCTCGCACTCGCGAGATACTC     | 60  |
| PB2 245467 Method S | 1   | ATGGAGAGAATAA[A]AGAACTAAGAGATCTAATGTCACAGTCTCGCACTCGCGAGATACTC   | 60  |
| PB2 245467 Method E | 1   | ATGGAGAGAATAAGAGAACTAAGAGATCTAATGTCACAGTCTCGCACTCGCGAGATACTC     | 60  |
| PB2 245467 Method K | 1   | ATGGAGAGAATAAGAGAACTAAGAGATCTAATGTCACAGTCTCGCACTCGCGAGATACTC     | 60  |
| PB2 245467 Method N | 1   | ATGGAGAGAATAAGAGAACTAAGAGATCTAATGTCACAGTCTCGCACTCGCGAGATACTC     | 60  |
|                     |     |                                                                  |     |
| PB2 245467 MiSeq    | 61  | ACCAAAACTACTGTGGACCACATGGCCATAATCAAAAAATACACATCGGGAAGGCAAGAG     | 120 |
| PB2 245467 Method A | 61  | ACCAAAACTACTGTGGACCACATGGCCATAATCAAAAAATACACATCGGGAAGGCAAGAG     | 120 |
| PB2 245467 Method S | 61  | ACCAAAAC[C]ACTGTGGACCACATGGCCATAATCAAAAAATACACATCGGGAAGGCAAGAG   | 120 |
| PB2 245467 Method E | 61  | ACCAAAACTACTGTGGACCACATGGCCATAATCAAAAAATACACATCGGGAAGGCAAGAG     | 120 |
| PB2 245467 Method K | 61  | ACCAAAACTACTGTGGACCACATGGCCATAATCAAAAAATACACATCGGGAAGGCAAGAG     | 120 |
| PB2 245467 Method N | 61  | ACCAAAACTACTGTGGACCACATGGCCATAATCAAAAAATACACATCGGGAAGGCAAGAG     | 120 |
|                     |     |                                                                  |     |
| PB2 245467 MiSeq    | 121 | AAGAACCCCGCGCTCAGGATGAAATGGATGATGGCAATGAAATATCCAATCACAGCAGAC     | 180 |
| PB2 245467 Method A | 121 | AAGAACCCCGCGCTCAGGATGAAATGGATGATGGCAATGAAATATCCAATCACAGCAGAC     | 180 |
| PB2 245467 Method S | 121 | AAGAACCCCGC[A]CTCAGGATGAAATGGATGATGGCAATGAAATA[C]CCAATCACAGCAGAC | 180 |
| PB2 245467 Method E | 121 | AAGAACCCCGCGCTCAGGATGAAATGGATGATGGCAATGAAATATCCAATCACAGCAGAC     | 180 |
| PB2 245467 Method K | 121 | AAGAACCCCGCGCTCAGGATGAAATGGATGATGGCAATGAAATATCCAATCACAGCAGAC     | 180 |
| PB2 245467 Method N | 121 | AAGAACCCCGCGCTCAGGATGAAATGGATGATGGCAATGAAATATCCAATCACAGCAGAC     | 180 |
|                     |     |                                                                  |     |
| PB2 245467 MiSeq    | 181 | AAGAGAATAATGGAAATGATTCCTGAAAGAAATGAACAAGGACAAACCCTTTGGAGCAAA     | 240 |
| PB2 245467 Method A | 181 | AAGAGAATAATGGAAATGATTCCTGAAAGAAATGAACAAGGACAAACCCTTTGGAGCAAA     | 240 |
| PB2 245467 Method S | 181 | AAGAGAATAATGGAAATGATTCCTGAAAGAAATGAACAAGG[G]CAAACCCT[C]TGGAGCAAA | 240 |
| PB2 245467 Method E | 181 | AAGAGAATAATGGAAATGATTCCTGAAAGAAATGAACAAGGACAAACCCTTTGGAGCAAA     | 240 |
| PB2 245467 Method K | 181 | AAGAGAATAATGGAAATGATTCCTGAAAGAAATGAACAAGGACAAACCCTTTGGAGCAAA     | 240 |
| PB2 245467 Method N | 181 | AAGAGAATAATGGAAATGATTCCTGAAAGAAATGAACAAGGACAAACCCTTTGGAGCAAA     | 240 |

|                     |     |                                                              |     |
|---------------------|-----|--------------------------------------------------------------|-----|
| PB2 245467 MiSeq    | 241 | ACGAACGATGCCGGGTCTGACCGAGTGATGGTATCACCTCTGGCCGTGACATGGTGGAAT | 300 |
| PB2 245467 Method A | 241 | ACGAACGATGCCGGGTCTGACCGAGTGATGGTATCACCTCTGGCCGTGACATGGTGGAAT | 300 |
| PB2 245467 Method S | 241 | ACGAACGATGCCGGGTCTGACCGAGTGATGGTATCACCTCTGGCCGTGACATGGTGGAAT | 300 |
| PB2 245467 Method E | 241 | ACGAACGATGCCGGGTCTGACCGAGTGATGGTATCACCTCTGGCCGTGACATGGTGGAAT | 300 |
| PB2 245467 Method K | 241 | ACGAACGATGCCGGGTCTGACCGAGTGATGGTATCACCTCTGGCCGTGACATGGTGGAAT | 300 |
| PB2 245467 Method N | 241 | ACGAACGATGCCGGGTCTGACCGAGTGATGGTATCACCTCTGGCCGTGACATGGTGGAAT | 300 |

|                     |     |                                                               |     |
|---------------------|-----|---------------------------------------------------------------|-----|
| PB2 245467 MiSeq    | 301 | AGGAACGGACCAACAACAAGTACGGTCCACTACCCAAAGGTATACAAAACGTATTTTCGAA | 360 |
| PB2 245467 Method A | 301 | AGGAACGGACCAACAACAAGTACGGTCCACTACCCAAAGGTATACAAAACGTATTTTCGAA | 360 |
| PB2 245467 Method S | 301 | AGGAATGGACCAACAACAAGTACAGTCCACTACCCAAAGGTATACAAAACGTATTTTCGAA | 360 |
| PB2 245467 Method E | 301 | AGGAACGGACCAACAACAAGTACGGTCCACTACCCAAAGGTATACAAAACGTATTTTCGAA | 360 |
| PB2 245467 Method K | 301 | AGGAACGGACCAACAACAAGTACGGTCCACTACCCAAAGGTATACAAAACGTATTTTCGAA | 360 |
| PB2 245467 Method N | 301 | AGGAACGGACCAACAACAAGTACGGTCCACTACCCAAAGGTATACAAAACGTATTTTCGAA | 360 |

|                     |     |                                                              |     |
|---------------------|-----|--------------------------------------------------------------|-----|
| PB2 245467 MiSeq    | 361 | AAAGTTGAAAGATTGAAACATGGGACCTTTGGTCCTGTTCACTTCAGAAATCAAGTTAAG | 420 |
| PB2 245467 Method A | 361 | AAAGTTGAAAGATTGAAACATGGGACCTTTGGTCCTGTTCACTTCAGAAATCAAGTTAAG | 420 |
| PB2 245467 Method S | 361 | AAAGTTGAAAGATTGAAACATGGGACCTTTGGTCCTGTTCACTTCAGAAATCAAGTTAAG | 420 |
| PB2 245467 Method E | 361 | AAAGTTGAAAGATTGAAACATGGGACCTTTGGTCCTGTTCACTTCAGAAATCAAGTTAAG | 420 |
| PB2 245467 Method K | 361 | AAAGTTGAAAGATTGAAACATGGGACCTTTGGTCCTGTTCACTTCAGAAATCAAGTTAAG | 420 |
| PB2 245467 Method N | 361 | AAAGTTGAAAGATTGAAACATGGGACCTTTGGTCCTGTTCACTTCAGAAATCAAGTTAAG | 420 |

|                     |     |                                                               |     |
|---------------------|-----|---------------------------------------------------------------|-----|
| PB2 245467 MiSeq    | 421 | ATAAGACGGAGAGTCGACATAAAACCCAGGCCATGCAGACCTCAGTGCCAAAGAGGCGCAG | 480 |
| PB2 245467 Method A | 421 | ATAAGACGGAGAGTCGACATAAAACCCAGGCCATGCAGACCTCAGTGCCAAAGAGGCGCAG | 480 |
| PB2 245467 Method S | 421 | ATAAGACGGAGAGTCGACATAAAACCCAGGCCATGCAGACCTCAGTGCCAAAGAGGCGCAG | 480 |
| PB2 245467 Method E | 421 | ATAAGACGGAGAGTCGACATAAAACCCAGGCCATGCAGACCTCAGTGCCAAAGAGGCGCAG | 480 |
| PB2 245467 Method K | 421 | ATAAGACGGAGAGTCGACATAAAACCCAGGCCATGCAGACCTCAGTGCCAAAGAGGCGCAG | 480 |
| PB2 245467 Method N | 421 | ATAAGACGGAGAGTCGACATAAAACCCAGGCCATGCAGACCTCAGTGCCAAAGAGGCGCAG | 480 |

|                     |     |                                                              |     |
|---------------------|-----|--------------------------------------------------------------|-----|
| PB2 245467 MiSeq    | 481 | GATGTAATCATGGAAGTTGTCTTCCCAAATGAAGTGGGAGCGAGAATACTAACATCGGAG | 540 |
| PB2 245467 Method A | 481 | GATGTAATCATGGAAGTTGTCTTCCCAAATGAAGTGGGAGCGAGAATACTAACATCGGAG | 540 |
| PB2 245467 Method S | 481 | GATGTAATCATGGAAGTTGTCTTCCCAAATGAAGTGGGAGCGAGAATACTAACATCGGAG | 540 |
| PB2 245467 Method E | 481 | GATGTAATCATGGAAGTTGTCTTCCCAAATGAAGTGGGAGCGAGAATACTAACATCGGAG | 540 |
| PB2 245467 Method K | 481 | GATGTAATCATGGAAGTTGTCTTCCCAAATGAAGTGGGAGCGAGAATACTAACATCGGAG | 540 |
| PB2 245467 Method N | 481 | GATGTAATCATGGAAGTTGTCTTCCCAAATGAAGTGGGAGCGAGAATACTAACATCGGAG | 540 |

|                     |     |                                                                |     |
|---------------------|-----|----------------------------------------------------------------|-----|
| PB2 245467 MiSeq    | 541 | TCACAACCTGACGATAACAAAGGAGAAGAAGGAAGAAGTCCAAGACTGCAAAAATTGCACCT | 600 |
| PB2 245467 Method A | 541 | TCACAACCTGACGATAACAAAGGAGAAGAAGGAAGAAGTCCAAGACTGCAAAAATTGCACCT | 600 |
| PB2 245467 Method S | 541 | TCACAACCTGACGATAACAAAGGAGAAGAAGGAAGAAGTCCAAGACTGCAAAAATTGCACCT | 600 |
| PB2 245467 Method E | 541 | TCACAACCTGACGATAACAAAGGAGAAGAAGGAAGAAGTCCAAGACTGCAAAAATTGCACCT | 600 |
| PB2 245467 Method K | 541 | TCACAACCTGACGATAACAAAGGAGAAGAAGGAAGAAGTCCAAGACTGCAAAAATTGCACCT | 600 |
| PB2 245467 Method N | 541 | TCACAACCTGACGATAACAAAGGAGAAGAAGGAAGAAGTCCAAGACTGCAAAAATTGCACCT | 600 |

|                     |     |                                                                |     |
|---------------------|-----|----------------------------------------------------------------|-----|
| PB2 245467 MiSeq    | 601 | TTGATGGTCGCATACATGCTAGAAAAGAGAGTTAGTCCGCAAGACGAGGTTTCCTCCCAGTG | 660 |
| PB2 245467 Method A | 601 | TTGATGGTCGCATACATGCTAGAAAAGAGAGTTAGTCCGCAAGACGAGGTTTCCTCCCAGTG | 660 |
| PB2 245467 Method S | 601 | TTGATGGTCGCATACATGCTAGAAAAGAGAGTTAGTCCGCAAGACGAGGTTTCCTCCCAGTG | 660 |
| PB2 245467 Method E | 601 | TTGATGGTCGCATACATGCTAGAAAAGAGAGTTAGTCCGCAAGACGAGGTTTCCTCCCAGTG | 660 |
| PB2 245467 Method K | 601 | TTGATGGTCGCATACATGCTAGAAAAGAGAGTTAGTCCGCAAGACGAGGTTTCCTCCCAGTG | 660 |
| PB2 245467 Method N | 601 | TTGATGGTCGCATACATGCTAGAAAAGAGAGTTAGTCCGCAAGACGAGGTTTCCTCCCAGTG | 660 |

|                     |     |                                                              |     |
|---------------------|-----|--------------------------------------------------------------|-----|
| PB2 245467 MiSeq    | 661 | GCTGGTGGAACAAGCAGTGTCTATATTGAGGTGCTGCATTTAACCCAGGGGACATGCTGG | 720 |
| PB2 245467 Method A | 661 | GCTGGTGGAACAAGCAGTGTCTATATTGAGGTGCTGCATTTAACCCAGGGGACATGCTGG | 720 |
| PB2 245467 Method S | 661 | GCTGGTGGAACAAGCAGTGTCTATATTGAGGTGCTGCATTTAACCCAGGGGACATGCTGG | 720 |
| PB2 245467 Method E | 661 | GCTGGTGGAACAAGCAGTGTCTATATTGAGGTGCTGCATTTAACCCAGGGGACATGCTGG | 720 |
| PB2 245467 Method K | 661 | GCTGGTGGAACAAGCAGTGTCTATATTGAGGTGCTGCATTTAACCCAGGGGACATGCTGG | 720 |
| PB2 245467 Method N | 661 | GCTGGTGGAACAAGCAGTGTCTATATTGAGGTGCTGCATTTAACCCAGGGGACATGCTGG | 720 |

|                     |     |                                                              |     |
|---------------------|-----|--------------------------------------------------------------|-----|
| PB2 245467 MiSeq    | 721 | GAGCAGATGTACACTCCAGGAGGAGAAGTGAGAAATGATGATGTAGACCAGAGTTTGATT | 780 |
| PB2 245467 Method A | 721 | GAGCAGATGTACACTCCAGGAGGAGAAGTGAGAAATGATGATGTAGACCAGAGTTTGATT | 780 |
| PB2 245467 Method S | 721 | GAGCAGATGTACACTCCAGGAGGAGAAGTGAGAAATGATGATGTAGACCAGAGTTTGATT | 780 |
| PB2 245467 Method E | 721 | GAGCAGATGTACACTCCAGGAGGAGAAGTGAGAAATGATGATGTAGACCAGAGTTTGATT | 780 |
| PB2 245467 Method K | 721 | GAGCAGATGTACACTCCAGGAGGAGAAGTGAGAAATGATGATGTAGACCAGAGTTTGATT | 780 |
| PB2 245467 Method N | 721 | GAGCAGATGTACACTCCAGGAGGAGAAGTGAGAAATGATGATGTAGACCAGAGTTTGATT | 780 |

|                     |     |                                                               |     |
|---------------------|-----|---------------------------------------------------------------|-----|
| PB2 245467 MiSeq    | 781 | ATCGCCGCCAGGAACATAGTAAGAAGAGCAACAGTATCAGCAGATCCATTAGCATCTCTA  | 840 |
| PB2 245467 Method A | 781 | ATCGCCGCCAGGAACATAGTAAGAAGAGCAACAGTATCAGCAGATCCATTAGCATCTCTA  | 840 |
| PB2 245467 Method S | 781 | ATCGCCTGCCAGGAACATAGTAAGAAGAGCAACAGTATCAGCAGATCCATTAGCATCTCTA | 840 |
| PB2 245467 Method E | 781 | ATCGCCGCCAGGAACATAGTAAGAAGAGCAACAGTATCAGCAGATCCATTAGCATCTCTA  | 840 |
| PB2 245467 Method K | 781 | ATCGCCGCCAGGAACATAGTAAGAAGAGCAACAGTATCAGCAGATCCATTAGCATCTCTA  | 840 |
| PB2 245467 Method N | 781 | ATCGCCGCCAGGAACATAGTAAGAAGAGCAACAGTATCAGCAGATCCATTAGCATCTCTA  | 840 |

|                     |      |                                                              |      |
|---------------------|------|--------------------------------------------------------------|------|
| PB2 245467 MiSeq    | 841  | TTGGAGATGTGCCACAGCACACAGATTGGGGGAATAAGGATGGTCGACATTCTTCGACAA | 900  |
| PB2 245467 Method A | 841  | TTGGAGATGTGCCACAGCACACAGATTGGGGGAATAAGGATGGTCGACATTCTTCGACAA | 900  |
| PB2 245467 Method S | 841  | TTGGAGATGTGCCACAGCACACAGATTGGGGGAATAAGGATGGTCGACATCCTTCGGCAA | 900  |
| PB2 245467 Method E | 841  | TTGGAGATGTGCCACAGCACACAGATTGGGGGAATAAGGATGGTCGACATTCTTCGACAA | 900  |
| PB2 245467 Method K | 841  | TTGGAGATGTGCCACAGCACACAGATTGGGGGAATAAGGATGGTCGACATTCTTCGACAA | 900  |
| PB2 245467 Method N | 841  | TTGGAGATGTGCCACAGCACACAGATTGGGGGAATAAGGATGGTCGACATTCTTCGACAA | 900  |
|                     |      |                                                              |      |
| PB2 245467 MiSeq    | 901  | AATCCAACAGAGGAACAAGCCGTGGATATATGCAAGGCAGCAATGGGCTTGAGGATTAGC | 960  |
| PB2 245467 Method A | 901  | AATCCAACAGAGGAACAAGCCGTGGATATATGCAAGGCAGCAATGGGCTTGAGGATTAGC | 960  |
| PB2 245467 Method S | 901  | AATCCAACAGAGGAACAAGCCGTGGATATATGCAAGGCAGCAATGGGCTTGAGGATTAGC | 960  |
| PB2 245467 Method E | 901  | AATCCAACAGAGGAACAAGCCGTGGATATATGCAAGGCAGCAATGGGCTTGAGGATTAGC | 960  |
| PB2 245467 Method K | 901  | AATCCAACAGAGGAACAAGCCGTGGATATATGCAAGGCAGCAATGGGCTTGAGGATTAGC | 960  |
| PB2 245467 Method N | 901  | AATCCAACAGAGGAACAAGCCGTGGATATATGCAAGGCAGCAATGGGCTTGAGGATTAGC | 960  |
|                     |      |                                                              |      |
| PB2 245467 MiSeq    | 961  | TCATCTTTCAGCTTTGGTGGATTCACTTTCAAAGAACAAGTGGATCATCAGTCAAAAGA  | 1020 |
| PB2 245467 Method A | 961  | TCATCTTTCAGCTTTGGTGGATTCACTTTCAAAGAACAAGTGGATCATCAGTCAAAAGA  | 1020 |
| PB2 245467 Method S | 961  | TCATCTTTCAGCTTTGGTGGATTCACTTTCAAAGAACAAGTGGATCATCAGTCAAAAGA  | 1020 |
| PB2 245467 Method E | 961  | TCATCTTTCAGCTTTGGTGGATTCACTTTCAAAGAACAAGTGGATCATCAGTCAAAAGA  | 1020 |
| PB2 245467 Method K | 961  | TCATCTTTCAGCTTTGGTGGATTCACTTTCAAAGAACAAGTGGATCATCAGTCAAAAGA  | 1020 |
| PB2 245467 Method N | 961  | TCATCTTTCAGCTTTGGTGGATTCACTTTCAAAGAACAAGTGGATCATCAGTCAAAAGA  | 1020 |
|                     |      |                                                              |      |
| PB2 245467 MiSeq    | 1021 | GAAGAAGAAGTGCTTACGGGCAACCTTCAAACACTGAAAATAAGAGTACATGAGGGGTAT | 1080 |
| PB2 245467 Method A | 1021 | GAAGAAGAAGTGCTTACGGGCAACCTTCAAACACTGAAAATAAGAGTACATGAGGGGTAT | 1080 |
| PB2 245467 Method S | 1021 | GAAGAAGAAGTGCTTACGGGCAACCTTCAAACACTGAAAATAAGAGTACATGAGGGGTAT | 1080 |
| PB2 245467 Method E | 1021 | GAAGAAGAAGTGCTTACGGGCAACCTTCAAACACTGAAAATAAGAGTACATGAGGGGTAT | 1080 |
| PB2 245467 Method K | 1021 | GAAGAAGAAGTGCTTACGGGCAACCTTCAAACACTGAAAATAAGAGTACATGAGGGGTAT | 1080 |
| PB2 245467 Method N | 1021 | GAAGAAGAAGTGCTTACGGGCAACCTTCAAACACTGAAAATAAGAGTACATGAGGGGTAT | 1080 |
|                     |      |                                                              |      |
| PB2 245467 MiSeq    | 1081 | GAAGAGTTCACGATGGTTGGAAGAAGAGCAACGGCTATTCTCAGGAAGGCAACCAGAAGG | 1140 |
| PB2 245467 Method A | 1081 | GAAGAGTTCACGATGGTTGGAAGAAGAGCAACGGCTATTCTCAGGAAGGCAACCAGAAGG | 1140 |
| PB2 245467 Method S | 1081 | GAAGAGTTCACGATGGTTGGAAGAAGAGCAACGGCTATTCTCAGGAAGGCAACCAGAAGG | 1140 |
| PB2 245467 Method E | 1081 | GAAGAGTTCACGATGGTTGGAAGAAGAGCAACGGCTATTCTCAGGAAGGCAACCAGAAGG | 1140 |
| PB2 245467 Method K | 1081 | GAAGAGTTCACGATGGTTGGAAGAAGAGCAACGGCTATTCTCAGGAAGGCAACCAGAAGG | 1140 |
| PB2 245467 Method N | 1081 | GAAGAGTTCACGATGGTTGGAAGAAGAGCAACGGCTATTCTCAGGAAGGCAACCAGAAGG | 1140 |

|                     |      |                                                               |      |
|---------------------|------|---------------------------------------------------------------|------|
| PB2 245467 MiSeq    | 1141 | TTGATCCAGCTAATAGTAAGTGGGAAGAGACGAGCAGTCAATTGCTGAAGCAATAATTGTA | 1200 |
| PB2 245467 Method A | 1141 | TTGATCCAGCTAATAGTAAGTGGGAAGAGACGAGCAGTCAATTGCTGAAGCAATAATTGTA | 1200 |
| PB2 245467 Method S | 1141 | TTGATCCAGCTAATAGTAAGTGGGAAGAGACGAGCAGTCAATTGCTGAAGCAATAATTGTG | 1200 |
| PB2 245467 Method E | 1141 | TTGATCCAGCTAATAGTAAGTGGGAAGAGACGAGCAGTCAATTGCTGAAGCAATAATTGTA | 1200 |
| PB2 245467 Method K | 1141 | TTGATCCAGCTAATAGTAAGTGGGAAGAGACGAGCAGTCAATTGCTGAAGCAATAATTGTA | 1200 |
| PB2 245467 Method N | 1141 | TTGATCCAGCTAATAGTAAGTGGGAAGAGACGAGCAGTCAATTGCTGAAGCAATAATTGTA | 1200 |

|                     |      |                                                                  |      |
|---------------------|------|------------------------------------------------------------------|------|
| PB2 245467 MiSeq    | 1201 | GCCATGGTATTCTCACAGGAAGACTGCATGATCAAGGCAGTTCGAGGTGATCTGAATTTT     | 1260 |
| PB2 245467 Method A | 1201 | GCCATGGTATTCTCACAGGAAGACTGCATGATCAAGGCAGTTCGAGGTGATCTGAATTTT     | 1260 |
| PB2 245467 Method S | 1201 | GCCATGGTATTCTC[C]CA[A]GAAGACTGCATGATCAAGGCAGTTCGAGGTGATCTGAATTTT | 1260 |
| PB2 245467 Method E | 1201 | GCCATGGTATTCTCACAGGAAGACTGCATGATCAAGGCAGTTCGAGGTGATCTGAATTTT     | 1260 |
| PB2 245467 Method K | 1201 | GCCATGGTATTCTCACAGGAAGACTGCATGATCAAGGCAGTTCGAGGTGATCTGAATTTT     | 1260 |
| PB2 245467 Method N | 1201 | GCCATGGTATTCTCACAGGAAGACTGCATGATCAAGGCAGTTCGAGGTGATCTGAATTTT     | 1260 |

|                     |      |                                                              |      |
|---------------------|------|--------------------------------------------------------------|------|
| PB2 245467 MiSeq    | 1261 | GTCAATAGGGCGAACCAGCGGCTGAATCCAATGCATCAACTCTTGAGACACTTCCAAAAG | 1320 |
| PB2 245467 Method A | 1261 | GTCAATAGGGCGAACCAGCGGCTGAATCCAATGCATCAACTCTTGAGACACTTCCAAAAG | 1320 |
| PB2 245467 Method S | 1261 | GTCAATAGGGCGAACCAGCGGCTGAATCCAATGCATCAACTCTTGAGACACTTCCAAAAG | 1320 |
| PB2 245467 Method E | 1261 | GTCAATAGGGCGAACCAGCGGCTGAATCCAATGCATCAACTCTTGAGACACTTCCAAAAG | 1320 |
| PB2 245467 Method K | 1261 | GTCAATAGGGCGAACCAGCGGCTGAATCCAATGCATCAACTCTTGAGACACTTCCAAAAG | 1320 |
| PB2 245467 Method N | 1261 | GTCAATAGGGCGAACCAGCGGCTGAATCCAATGCATCAACTCTTGAGACACTTCCAAAAG | 1320 |

|                     |      |                                                                   |      |
|---------------------|------|-------------------------------------------------------------------|------|
| PB2 245467 MiSeq    | 1321 | GATGCTAAAGTGCTTTTCCAAAACCTGGGGAATTGAATCCATTGACAACGTGATGGGGATG     | 1380 |
| PB2 245467 Method A | 1321 | GATGCTAAAGTGCTTTTCCAAAACCTGGGGAATTGAATCCATTGACAACGTGATGGGGATG     | 1380 |
| PB2 245467 Method S | 1321 | GATGCTAAAGTGCTTTTCCAAAACCTGGGGAATTGAA[C]CCATTGACAA[T]GTGATGGGGATG | 1380 |
| PB2 245467 Method E | 1321 | GATGCTAAAGTGCTTTTCCAAAACCTGGGGAATTGAATCCATTGACAACGTGATGGGGATG     | 1380 |
| PB2 245467 Method K | 1321 | GATGCTAAAGTGCTTTTCCAAAACCTGGGGAATTGAATCCATTGACAACGTGATGGGGATG     | 1380 |
| PB2 245467 Method N | 1321 | GATGCTAAAGTGCTTTTCCAAAACCTGGGGAATTGAATCCATTGACAACGTGATGGGGATG     | 1380 |

|                     |      |                                                                  |      |
|---------------------|------|------------------------------------------------------------------|------|
| PB2 245467 MiSeq    | 1381 | ATTGGGATATTGCCCGACATGACCCCAAGCACTGAGATGTCACTGAGGGGAATAAGAGTC     | 1440 |
| PB2 245467 Method A | 1381 | ATTGGGATATTGCCCGACATGACCCCAAGCACTGAGATGTCACTGAGGGGAATAAGAGTC     | 1440 |
| PB2 245467 Method S | 1381 | AT[C]GGGATATTGCCCGACATGACCCCAAGCACTGAGATGTCACTGAGGGG[C]ATAAGAGTC | 1440 |
| PB2 245467 Method E | 1381 | ATTGGGATATTGCCCGACATGACCCCAAGCACTGAGATGTCACTGAGGGGAATAAGAGTC     | 1440 |
| PB2 245467 Method K | 1381 | ATTGGGATATTGCCCGACATGACCCCAAGCACTGAGATGTCACTGAGGGGAATAAGAGTC     | 1440 |
| PB2 245467 Method N | 1381 | ATTGGGATATTGCCCGACATGACCCCAAGCACTGAGATGTCACTGAGGGGAATAAGAGTC     | 1440 |

|                     |      |                                                                 |      |
|---------------------|------|-----------------------------------------------------------------|------|
| PB2 245467 MiSeq    | 1441 | AGCAAGATGGGAGTAGATGAATACTCCAGTACAGAGAGGGTGGTGGTGAGCATCGACCGA    | 1500 |
| PB2 245467 Method A | 1441 | AGCAAGATGGGAGTAGATGAATACTCCAGTACAGAGAGGGTGGTGGTGAGCATCGACCGA    | 1500 |
| PB2 245467 Method S | 1441 | AGTAAAGATGGGAGTAGATGAATACTCCAGTACAGAGAGGGTGGTAAAGTGAGCATCGACCGA | 1500 |
| PB2 245467 Method E | 1441 | AGCAAGATGGGAGTAGATGAATACTCCAGTACAGAGAGGGTGGTGGTGAGCATCGACCGA    | 1500 |
| PB2 245467 Method K | 1441 | AGCAAGATGGGAGTAGATGAATACTCCAGTACAGAGAGGGTGGTGGTGAGCATCGACCGA    | 1500 |
| PB2 245467 Method N | 1441 | AGCAAGATGGGAGTAGATGAATACTCCAGTACAGAGAGGGTGGTGGTGAGCATCGACCGA    | 1500 |

|                     |      |                                                               |      |
|---------------------|------|---------------------------------------------------------------|------|
| PB2 245467 MiSeq    | 1501 | TTTTTAAGAGTCCGGGACCAACGAGGGAATGTACTATTGTCACCAGAAGAAGTCAGCGAG  | 1560 |
| PB2 245467 Method A | 1501 | TTTTTAAGAGTCCGGGACCAACGAGGGAATGTACTATTGTCACCAGAAGAAGTCAGCGAG  | 1560 |
| PB2 245467 Method S | 1501 | TTTTTAAGAGTTCCGGGACCAACGAGGGAACGTACTATTGTCACCTGAAGAAGTCAGCGAG | 1560 |
| PB2 245467 Method E | 1501 | TTTTTAAGAGTCCGGGACCAACGAGGGAATGTACTATTGTCACCAGAAGAAGTCAGCGAG  | 1560 |
| PB2 245467 Method K | 1501 | TTTTTAAGAGTCCGGGACCAACGAGGGAATGTACTATTGTCACCAGAAGAAGTCAGCGAG  | 1560 |
| PB2 245467 Method N | 1501 | TTTTTAAGAGTCCGGGACCAACGAGGGAATGTACTATTGTCACCAGAAGAAGTCAGCGAG  | 1560 |

|                     |      |                                                               |      |
|---------------------|------|---------------------------------------------------------------|------|
| PB2 245467 MiSeq    | 1561 | ACACAAGGAACAGAGAAATTGACAATCACTTATTCATCATCAATGATGTGGGAGATCAAT  | 1620 |
| PB2 245467 Method A | 1561 | ACACAAGGAACAGAGAAATTGACAATCACTTATTCATCATCAATGATGTGGGAGATCAAT  | 1620 |
| PB2 245467 Method S | 1561 | ACACAAGGACACAGAGAAATTGACAATCACTTATTCATCATCAATGATGTGGGAGATCAAT | 1620 |
| PB2 245467 Method E | 1561 | ACACAAGGAACAGAGAAATTGACAATCACTTATTCATCATCAATGATGTGGGAGATCAAT  | 1620 |
| PB2 245467 Method K | 1561 | ACACAAGGAACAGAGAAATTGACAATCACTTATTCATCATCAATGATGTGGGAGATCAAT  | 1620 |
| PB2 245467 Method N | 1561 | ACACAAGGAACAGAGAAATTGACAATCACTTATTCATCATCAATGATGTGGGAGATCAAT  | 1620 |

|                     |      |                                                              |      |
|---------------------|------|--------------------------------------------------------------|------|
| PB2 245467 MiSeq    | 1621 | GGACCCGAATCGGTGTTGGTCAACACTTATCAGTGGATCATCAGGAACTGGGAAACTGTG | 1680 |
| PB2 245467 Method A | 1621 | GGACCCGAATCGGTGTTGGTCAACACTTATCAGTGGATCATCAGGAACTGGGAAACTGTG | 1680 |
| PB2 245467 Method S | 1621 | GGACCTGAGTCGGTGTGGTCAACACTTATCAGTGGATCATCAGAAATGGGAAACTGTG   | 1680 |
| PB2 245467 Method E | 1621 | GGACCCGAATCGGTGTTGGTCAACACTTATCAGTGGATCATCAGGAACTGGGAAACTGTG | 1680 |
| PB2 245467 Method K | 1621 | GGACCCGAATCGGTGTTGGTCAACACTTATCAGTGGATCATCAGGAACTGGGAAACTGTG | 1680 |
| PB2 245467 Method N | 1621 | GGACCCGAATCGGTGTTGGTCAACACTTATCAGTGGATCATCAGGAACTGGGAAACTGTG | 1680 |

|                     |      |                                                             |      |
|---------------------|------|-------------------------------------------------------------|------|
| PB2 245467 MiSeq    | 1681 | AAAATTCAATGGTACAGGATCCCACAATGTTATATAATAAGATGGAATTCGAGCCATTC | 1740 |
| PB2 245467 Method A | 1681 | AAAATTCAATGGTACAGGATCCCACAATGTTATATAATAAGATGGAATTCGAGCCATTC | 1740 |
| PB2 245467 Method S | 1681 | AAAATTCAATGGTACAGGATCCCACAATGTTATATAATAAGATGGAATTCGAGCCATTC | 1740 |
| PB2 245467 Method E | 1681 | AAAATTCAATGGTACAGGATCCCACAATGTTATATAATAAGATGGAATTCGAGCCATTC | 1740 |
| PB2 245467 Method K | 1681 | AAAATTCAATGGTACAGGATCCCACAATGTTATATAATAAGATGGAATTCGAGCCATTC | 1740 |
| PB2 245467 Method N | 1681 | AAAATTCAATGGTACAGGATCCCACAATGTTATATAATAAGATGGAATTCGAGCCATTC | 1740 |

|                            |      |                                                                        |      |
|----------------------------|------|------------------------------------------------------------------------|------|
| <b>PB2 245467 MiSeq</b>    | 1741 | CAGTCTCTGATACCTAAAGCAGCCAGAGGTCAATACAGTGGATTTCGTGAGGACACTATTC          | 1800 |
| <b>PB2 245467 Method A</b> | 1741 | CAGTCTCTGATACCTAAAGCAGCCAGAGGTCAATACAGTGGATTTCGTGAGGACACTATTC          | 1800 |
| <b>PB2 245467 Method S</b> | 1741 | CAGTCTCTG <b>G</b> TACCTAAAGCAGCCAGAGGTCAATACAGTGGATTTCGTGAGGACACTATTC | 1800 |
| <b>PB2 245467 Method E</b> | 1741 | CAGTCTCTGATACCTAAAGCAGCCAGAGGTCAATACAGTGGATTTCGTGAGGACACTATTC          | 1800 |
| <b>PB2 245467 Method K</b> | 1741 | CAGTCTCTGATACCTAAAGCAGCCAGAGGTCAATACAGTGGATTTCGTGAGGACACTATTC          | 1800 |
| <b>PB2 245467 Method N</b> | 1741 | CAGTCTCTGATACCTAAAGCAGCCAGAGGTCAATACAGTGGATTTCGTGAGGACACTATTC          | 1800 |

|                            |      |                                                                      |      |
|----------------------------|------|----------------------------------------------------------------------|------|
| <b>PB2 245467 MiSeq</b>    | 1801 | CAGCAGATGCGAGATGTGCTCGGAACATTTGACACTGTCCAAATAATAAACTCCTCCCC          | 1860 |
| <b>PB2 245467 Method A</b> | 1801 | CAGCAGATGCGAGATGTGCTCGGAACATTTGACACTGTCCAAATAATAAACTCCTCCCC          | 1860 |
| <b>PB2 245467 Method S</b> | 1801 | CAGCAGATGCGAGATGTGCTCGGAACATTTGACACTGT <b>T</b> CAAATAATAAACTCCTCCCC | 1860 |
| <b>PB2 245467 Method E</b> | 1801 | CAGCAGATGCGAGATGTGCTCGGAACATTTGACACTGTCCAAATAATAAACTCCTCCCC          | 1860 |
| <b>PB2 245467 Method K</b> | 1801 | CAGCAGATGCGAGATGTGCTCGGAACATTTGACACTGTCCAAATAATAAACTCCTCCCC          | 1860 |
| <b>PB2 245467 Method N</b> | 1801 | CAGCAGATGCGAGATGTGCTCGGAACATTTGACACTGTCCAAATAATAAACTCCTCCCC          | 1860 |

|                            |      |                                                                       |      |
|----------------------------|------|-----------------------------------------------------------------------|------|
| <b>PB2 245467 MiSeq</b>    | 1861 | TTTGCTGCTGCCCCACCAGAACAAAGTAGAATGCAATTCTCCTCCCTGACTGTAAATGTG          | 1920 |
| <b>PB2 245467 Method A</b> | 1861 | TTTGCTGCTGCCCCACCAGAACAAAGTAGAATGCAATTCTCCTCCCTGACTGTAAATGTG          | 1920 |
| <b>PB2 245467 Method S</b> | 1861 | TTTGCTGCTGCCCCACCAGAACAAAGTAG <b>G</b> ATGCAATTCTCCTCCCTGACTGTAAATGTG | 1920 |
| <b>PB2 245467 Method E</b> | 1861 | TTTGCTGCTGCCCCACCAGAACAAAGTAGAATGCAATTCTCCTCCCTGACTGTAAATGTG          | 1920 |
| <b>PB2 245467 Method K</b> | 1861 | TTTGCTGCTGCCCCACCAGAACAAAGTAGAATGCAATTCTCCTCCCTGACTGTAAATGTG          | 1920 |
| <b>PB2 245467 Method N</b> | 1861 | TTTGCTGCTGCCCCACCAGAACAAAGTAGAATGCAATTCTCCTCCCTGACTGTAAATGTG          | 1920 |

|                            |      |                                                                       |      |
|----------------------------|------|-----------------------------------------------------------------------|------|
| <b>PB2 245467 MiSeq</b>    | 1921 | AGAGGATCAGGAATGAGAATACTGGTTAGAGGCAATTCCCCAGTGTTCAATTACAACAAG          | 1980 |
| <b>PB2 245467 Method A</b> | 1921 | AGAGGATCAGGAATGAGAATACTGGTTAGAGGCAATTCCCCAGTGTTCAATTACAACAAG          | 1980 |
| <b>PB2 245467 Method S</b> | 1921 | AGAGGATCAGGAATGAGAATACTGGT <b>A</b> AGAGGCAATTCCCCAGTGTTCAATTACAACAAG | 1980 |
| <b>PB2 245467 Method E</b> | 1921 | AGAGGATCAGGAATGAGAATACTGGTTAGAGGCAATTCCCCAGTGTTCAATTACAACAAG          | 1980 |
| <b>PB2 245467 Method K</b> | 1921 | AGAGGATCAGGAATGAGAATACTGGTTAGAGGCAATTCCCCAGTGTTCAATTACAACAAG          | 1980 |
| <b>PB2 245467 Method N</b> | 1921 | AGAGGATCAGGAATGAGAATACTGGTTAGAGGCAATTCCCCAGTGTTCAATTACAACAAG          | 1980 |

|                            |      |                                                              |      |
|----------------------------|------|--------------------------------------------------------------|------|
| <b>PB2 245467 MiSeq</b>    | 1981 | GCCACCAAGAGGCTCACAGTTCTCGGGAAAGATGCAGGTGCATTGACCGAAGATCCAGAT | 2040 |
| <b>PB2 245467 Method A</b> | 1981 | GCCACCAAGAGGCTCACAGTTCTCGGGAAAGATGCAGGTGCATTGACCGAAGATCCAGAT | 2040 |
| <b>PB2 245467 Method S</b> | 1981 | GCCACCAAGAGGCTCACAGTTCTCGGGAAAGATGCAGGTGCATTGACCGAAGATCCAGAT | 2040 |
| <b>PB2 245467 Method E</b> | 1981 | GCCACCAAGAGGCTCACAGTTCTCGGGAAAGATGCAGGTGCATTGACCGAAGATCCAGAT | 2040 |
| <b>PB2 245467 Method K</b> | 1981 | GCCACCAAGAGGCTCACAGTTCTCGGGAAAGATGCAGGTGCATTGACCGAAGATCCAGAT | 2040 |
| <b>PB2 245467 Method N</b> | 1981 | GCCACCAAGAGGCTCACAGTTCTCGGGAAAGATGCAGGTGCATTGACCGAAGATCCAGAT | 2040 |

|                     |      |                                                              |      |
|---------------------|------|--------------------------------------------------------------|------|
| PB2 245467 MiSeq    | 2041 | GAAGGCACATCTGGAGTAGAGTCTGCTGTTCTAAGAGGATTCCTCATTTTGGGCAAAGAA | 2100 |
| PB2 245467 Method A | 2041 | GAAGGCACATCTGGAGTAGAGTCTGCTGTTCTAAGAGGATTCCTCATTTTGGGCAAAGAA | 2100 |
| PB2 245467 Method S | 2041 | GAAGGCACAGCTGGAGTAGAGTCTGCTGTTCTAGAGGATTCCTCATTTTGGGCAAAGAA  | 2100 |
| PB2 245467 Method E | 2041 | GAAGGCACATCTGGAGTAGAGTCTGCTGTTCTAAGAGGATTCCTCATTTTGGGCAAAGAA | 2100 |
| PB2 245467 Method K | 2041 | GAAGGCACATCTGGAGTAGAGTCTGCTGTTCTAAGAGGATTCCTCATTTTGGGCAAAGAA | 2100 |
| PB2 245467 Method N | 2041 | GAAGGCACATCTGGAGTAGAGTCTGCTGTTCTAAGAGGATTCCTCATTTTGGGCAAAGAA | 2100 |

|                     |      |                                                              |      |
|---------------------|------|--------------------------------------------------------------|------|
| PB2 245467 MiSeq    | 2101 | GACAAGAGATATGGCCCAGCATTGAGCATCAATGAGCTGAGCAATCTTGCAAAGGGAGAG | 2160 |
| PB2 245467 Method A | 2101 | GACAAGAGATATGGCCCAGCATTGAGCATCAATGAGCTGAGCAATCTTGCAAAGGGAGAG | 2160 |
| PB2 245467 Method S | 2101 | GACAAGAGATATGGACCAGCATTGAGCATCAATGAGCTGAGCAATCTTGCAAAGGGAGAG | 2160 |
| PB2 245467 Method E | 2101 | GACAAGAGATATGGCCCAGCATTGAGCATCAATGAGCTGAGCAATCTTGCAAAGGGAGAG | 2160 |
| PB2 245467 Method K | 2101 | GACAAGAGATATGGCCCAGCATTGAGCATCAATGAGCTGAGCAATCTTGCAAAGGGAGAG | 2160 |
| PB2 245467 Method N | 2101 | GACAAGAGATATGGCCCAGCATTGAGCATCAATGAGCTGAGCAATCTTGCAAAGGGAGAG | 2160 |

|                     |      |                                                              |      |
|---------------------|------|--------------------------------------------------------------|------|
| PB2 245467 MiSeq    | 2161 | AAGGCTAATGTGCTAATTGGGCAAGGAGACGTGGTGTTGGTAATGAAACGGAAACGGGAC | 2220 |
| PB2 245467 Method A | 2161 | AAGGCTAATGTGCTAATTGGGCAAGGAGACGTGGTGTTGGTAATGAAACGGAAACGGGAC | 2220 |
| PB2 245467 Method S | 2161 | AAGGCTAATGTGCTAATTGGGCAAGGAGACGTGGTGTTGGTAATGAAACGGAAACGGGAC | 2220 |
| PB2 245467 Method E | 2161 | AAGGCTAATGTGCTAATTGGGCAAGGAGACGTGGTGTTGGTAATGAAACGGAAACGGGAC | 2220 |
| PB2 245467 Method K | 2161 | AAGGCTAATGTGCTAATTGGGCAAGGAGACGTGGTGTTGGTAATGAAACGGAAACGGGAC | 2220 |
| PB2 245467 Method N | 2161 | AAGGCTAATG-----TGGGCAAGGAGACGTGGTGTTGGTAA-----               | 2196 |

|                     |      |                                                              |      |
|---------------------|------|--------------------------------------------------------------|------|
| PB2 245467 MiSeq    | 2221 | TCTAGCATACTTACTGACAGCCAGACAGCGACCAAAAGGATTCGGATGGCCATCAATTAG | 2280 |
| PB2 245467 Method A | 2221 | TCTAGCATACTTACTGACAGCCAGACAGCGACCAAAAGGATTCGGATGGCCATCAATTAG | 2280 |
| PB2 245467 Method S | 2221 | TCTAGCATACTTACTGACAGCCAGACAGCGACCAAAAGGATTCGGATGGCCATCAATTAG | 2280 |
| PB2 245467 Method E | 2221 | TCTAGCATACTTACTGACAGCCAGACAGCGACCAAAAGGATTCGGATGGCCATCAATTAG | 2280 |
| PB2 245467 Method K | 2221 | TCTAGCATACTTACTGACAGCCAGACAGCGACCAAAAGGATTCGGATGGCCATCAATTAG | 2280 |
| PB2 245467 Method N | 2197 |                                                              | 2196 |
