# Supplementary material for: An Evaluation of Avian Influenza Virus Whole Genome Sequencing Approaches Using Nanopore Technology
Source: Preprints.org preprint supplement (doi:10.20944/preprints202301.0480.v1), 2023-01-26
Supplement: Supplementary file 16 [file supplementary]

| 245626   | PB2 | PB1 | PA | H5 | NP | N1 | MA | NS |
|----------|-----|-----|----|----|----|----|----|----|
| Method A | 1   | -   | 3  | -  | -  | -  | -  | -  |
| Method S | ND  | ND  | ND | ND | ND | ND | ND | ND |
| Method E | 2   | -   | -  | -  | -  | -  | -  | -  |
| Method K | 1   | -   | -  | -  | -  | 1  | -  | -  |
| Method N | 1   | 2   | 1  | -  | -  | -  | -  | -  |
