# Supplementary material for: An Evaluation of Avian Influenza Virus Whole Genome Sequencing Approaches Using Nanopore Technology
Source: Preprints.org preprint supplement (doi:10.20944/preprints202301.0480.v1), 2023-01-26
Supplement: Supplementary file 19 [file supplementary]

## Formatted Alignments

|                     |     |                                                               |     |
|---------------------|-----|---------------------------------------------------------------|-----|
| PB2 245625 MiSeq    | 1   | ATGGAGAGAATAAAAGAACTAAGAGATCTAATGTCACAGTCTCGCACTCGCGAGATACTG  | 60  |
| PB2 245626 Method A | 1   | ATGGAGAGAATAAAAGAAATAAGAGATCTAATGTCACAGTCTCGCACTCGCGAGATACTG  | 60  |
| PB2 245626 Method E | 1   | ATGGAGAGAATAAAAGAAATAAGAGATCTAATGTCACAGTCTCGCACTCGCGAGATACTG  | 60  |
| PB2 245626 Method K | 1   | ATGGAGAGAATAAAAGAAATAAGAGATCTAATGTCACAGTCTCGCACTCGCGAGATACTG  | 60  |
| PB2 245626 Method N | 1   | ATGGAGAGAATAAAAGAAATAAGAGATCTAATGTCACAGTCTCGCACTCGCGAGATACTG  | 60  |
|                     |     |                                                               |     |
| PB2 245625 MiSeq    | 61  | ACCAAAACCACTGTTGACCACATGGCCATAATCAAAAAGTACACATCGGGAAGGCAAGAG  | 120 |
| PB2 245626 Method A | 61  | ACCAAAACCACTGTTGACCACATGGCCATAATCAAAAAGTACACATCGGGAAGGCAAGAG  | 120 |
| PB2 245626 Method E | 61  | ACCAAAACCACTGTTGACCACATGGCCATAATCAAAAAGTACACATCGGGAAGGCAAGAG  | 120 |
| PB2 245626 Method K | 61  | ACCAAAACCACTGTTGACCACATGGCCATAATCAAAAAGTACACATCGGGAAGGCAAGAG  | 120 |
| PB2 245626 Method N | 61  | ACCAAAACCACTGTTGACCACATGGCCATAATCAAAAAGTACACATCGGGAAGGCAAGAG  | 120 |
|                     |     |                                                               |     |
| PB2 245625 MiSeq    | 121 | AAGAACCCCGCACTCAGAATGAAATGGATGATGGCAATGAAATATCCAATTACAGCAGAT  | 180 |
| PB2 245626 Method A | 121 | AAGAACCCCGCACTCAGAATGAAATGGATGATGGCAATGAAATATCCAATTACAGCAGAT  | 180 |
| PB2 245626 Method E | 121 | AAGAACCCCGCACTCAGAATGAAATGGATGATGGCAATGAAATATCCAATTACAGCAGAT  | 180 |
| PB2 245626 Method K | 121 | AAGAACCCCGCACTCAGAATGAAATGGATGATGGCAATGAAATATCCAATTACAGCAGAT  | 180 |
| PB2 245626 Method N | 121 | AAGAACCCCGCACTCAGAATGAAATGGATGATGGCAATGAAATATCCAATTACAGCAGAT  | 180 |
|                     |     |                                                               |     |
| PB2 245625 MiSeq    | 181 | AAGCGAATAATGGAAATGATCCCTGAGAGGAATGAACAAGGGCAAACCTCTCTGGAGCAAA | 240 |
| PB2 245626 Method A | 181 | AAGCGAATAATGGAAATGATCCCTGAGAGGAATGAACAAGGGCAAACCTCTCTGGAGCAAA | 240 |
| PB2 245626 Method E | 181 | AAGCGAATAATGGAAATGATCCCTGAGAGGAATGAACAAGGGCAAACCTCTCTGGAGCAAA | 240 |
| PB2 245626 Method K | 181 | AAGCGAATAATGGAAATGATCCCTGAGAGGAATGAACAAGGGCAAACCTCTCTGGAGCAAA | 240 |
| PB2 245626 Method N | 181 | AAGCGAATAATGGAAATGATCCCTGAGAGGAATGAACAAGGGCAAACCTCTCTGGAGCAAA | 240 |
|                     |     |                                                               |     |
| PB2 245625 MiSeq    | 241 | ACAAACGATGCCGGATCAGACCGAGTGATGGTATCACCCCTGGCTGTGACATGGTGGAAC  | 300 |
| PB2 245626 Method A | 241 | ACAAACGATGCCGGATCAGACCGAGTGATGGTATCACCCCTGGCTGTGACATGGTGGAAC  | 300 |
| PB2 245626 Method E | 241 | ACAAACGATGCCGGATCAGACCGAGTGATGGTATCACCCCTGGCTGTGACATGGTGGAAC  | 300 |
| PB2 245626 Method K | 241 | ACAAACGATGCCGGATCAGACCGAGTGATGGTATCACCCCTGGCTGTGACATGGTGGAAC  | 300 |
| PB2 245626 Method N | 241 | ACAAACGATGCCGGATCAGACCGAGTGATGGTATCACCCCTGGCTGTGACATGGTGGAAC  | 300 |

|                     |     |                              |                             |      |     |
|---------------------|-----|------------------------------|-----------------------------|------|-----|
| PB2 245625 MiSeq    | 301 | AGGAACGGACCAACAACAAGTACAGTTC | ACTACCCAAAGGTATATAAACTTATTT | CGAA | 360 |
| PB2 245626 Method A | 301 | AGGAACGGACCAACAACAAGTACAGTTC | ACTACCCAAAGGTATATAAACTTATTT | CGAA | 360 |
| PB2 245626 Method E | 301 | AGGAACGGACCAACAACAAGTACAGTTC | ACTACCCAAAGGTATATAAACTTATTT | CGAA | 360 |
| PB2 245626 Method K | 301 | AGGAACGGACCAACAACAAGTACAGTTC | ACTACCCAAAGGTATATAAACTTATTT | CGAA | 360 |
| PB2 245626 Method N | 301 | AGGAACGGACCAACAACAAGTACAGTTC | ACTACCCAAAGGTATATAAACTTATTT | CGAA | 360 |

|                     |     |                                                              |     |
|---------------------|-----|--------------------------------------------------------------|-----|
| PB2 245625 MiSeq    | 361 | AAAGTTGAAAGGTTGAAACACGGGACCTTTGGCCCTGTGCACTTCAGAAACCAAGTTAAG | 420 |
| PB2 245626 Method A | 361 | AAAGTTGAAAGGTTGAAACACGGGACCTTTGGCCCTGTGCACTTCAGAAACCAAGTTAAG | 420 |
| PB2 245626 Method E | 361 | AAAGTTGAAAGGTTGAAACACGGGACCTTTGGCCCTGTGCACTTCAGAAACCAAGTTAAG | 420 |
| PB2 245626 Method K | 361 | AAAGTTGAAAGGTTGAAACACGGGACCTTTGGCCCTGTGCACTTCAGAAACCAAGTTAAG | 420 |
| PB2 245626 Method N | 361 | AAAGTTGAAAGGTTGAAACACGGGACCTTTGGCCCTGTGCACTTCAGAAACCAAGTTAAG | 420 |

|                     |     |                                                              |     |
|---------------------|-----|--------------------------------------------------------------|-----|
| PB2 245625 MiSeq    | 421 | ATAAGACGGAGGGTCGATATAAACCCGGGCCATGCTGACCTCAGTGCCAGAGAGGCGCAG | 480 |
| PB2 245626 Method A | 421 | ATAAGACGGAGGGTCGATATAAACCCGGGCCATGCTGACCTCAGTGCCAGAGAGGCGCAG | 480 |
| PB2 245626 Method E | 421 | ATAAGACGGAGGGTCGATATAAACCCGGGCCATGCTGACCTCAGTGCCAGAGAGGCGCAG | 480 |
| PB2 245626 Method K | 421 | ATAAGACGGAGGGTCGATATAAACCCGGGCCATGCTGACCTCAGTGCCAGAGAGGCGCAG | 480 |
| PB2 245626 Method N | 421 | ATAAGACGGAGGGTCGATATAAACCCGGGCCATGCTGACCTCAGTGCCAGAGAGGCGCAG | 480 |

|                     |     |                                                              |     |
|---------------------|-----|--------------------------------------------------------------|-----|
| PB2 245625 MiSeq    | 481 | GATGTAATCATGGAAGTCGTCTTCCCAAATGAAGTGGGAGCAAGGATATTGACGTCGGAG | 540 |
| PB2 245626 Method A | 481 | GATGTAATCATGGAAGTCGTCTTCCCAAATGAAGTGGGAGCAAGGATATTGACGTCGGAG | 540 |
| PB2 245626 Method E | 481 | GATGTAATCATGGAAGTCGTCTTCCCAAATGAAGTGGGAGCAAGGATATTGACGTCGGAG | 540 |
| PB2 245626 Method K | 481 | GATGTAATCATGGAAGTCGTCTTCCCAAATGAAGTGGGAGCAAGGATATTGACGTCGGAG | 540 |
| PB2 245626 Method N | 481 | GATGTAATCATGGAAGTCGTCTTCCCAAATGAAGTGGGAGCAAGGATATTGACGTCGGAG | 540 |

|                     |     |                                                                 |     |
|---------------------|-----|-----------------------------------------------------------------|-----|
| PB2 245625 MiSeq    | 541 | TCACAACCTGACGATAACAAAGGAGAGAAAAGGGAAGAACTCCAGGACTGCAAAATCGCTCCT | 600 |
| PB2 245626 Method A | 541 | TCACAACCTGACGATAACAAAGGAGAGAAAAGGGAAGAACTCCAGGACTGCAAAATCGCTCCT | 600 |
| PB2 245626 Method E | 541 | TCACAACCTGACGATAACAAAGGAGAGAAAAGGGAAGAACTCCAGGACTGCAAAATCGCTCCT | 600 |
| PB2 245626 Method K | 541 | TCACAACCTGACGATAACAAAGGAGAGAAAAGGGAAGAACTCCAGGACTGCAAAATCGCTCCT | 600 |
| PB2 245626 Method N | 541 | TCACAACCTGACGATAACAAAGGAGAGAAAAGGGAAGAACTCCAGGACTGCAAAATCGCTCCT | 600 |

|                     |     |                                                               |     |
|---------------------|-----|---------------------------------------------------------------|-----|
| PB2 245625 MiSeq    | 601 | CTGATGGTTGCATACATGCTAGAAAAGAGAGTTGGTTTCGCAAGACGAGGTTTCTCCAGTT | 660 |
| PB2 245626 Method A | 601 | CTGATGGTTGCATACATGCTAGAAAAGAGAGTTGGTTTCGCAAGACGAGGTTTCTCCAGTT | 660 |
| PB2 245626 Method E | 601 | CTGATGGTTGCATACATGCTAGAAAAGAGAGTTGGTTTCGCAAGACGAGGTTTCTCCAGTT | 660 |
| PB2 245626 Method K | 601 | CTGATGGTTGCATACATGCTAGAAAAGAGAGTTGGTTTCGCAAGACGAGGTTTCTCCAGTT | 660 |
| PB2 245626 Method N | 601 | CTGATGGTTGCATACATGCTAGAAAAGAGAGTTGGTTTCGCAAGACGAGGTTTCTCCAGTT | 660 |
|                     |     |                                                               |     |
| PB2 245625 MiSeq    | 661 | GCTGGTGGGACAAGCAGTGTCTACATTGAGGTGCTGCATTTGACTCAGGGGACATGCTGG  | 720 |
| PB2 245626 Method A | 661 | GCTGGTGGGACAAGCAGTGTCTACATTGAGGTGCTGCATTTGACTCAGGGGACATGCTGG  | 720 |
| PB2 245626 Method E | 661 | GCTGGTGGGACAAGCAGTGTCTACATTGAGGTGCTGCATTTGACTCAGGGGACATGCTGG  | 720 |
| PB2 245626 Method K | 661 | GCTGGTGGGACAAGCAGTGTCTACATTGAGGTGCTGCATTTGACTCAGGGGACATGCTGG  | 720 |
| PB2 245626 Method N | 661 | GCTGGTGGGACAAGCAGTGTCTACATTGAGGTGCTGCATTTGACTCAGGGGACATGCTGG  | 720 |
|                     |     |                                                               |     |
| PB2 245625 MiSeq    | 721 | GAGCAGATGTACACTCCGGGAGGAGAAGTGAGGAACGATGATGTAGACCAAAGCTTGATC  | 780 |
| PB2 245626 Method A | 721 | GAGCAGATGTACACTCCGGGAGGAGAAGTGAGGAACGATGATGTAGACCAAAGCTTGATC  | 780 |
| PB2 245626 Method E | 721 | GAGCAGATGTACACTCCGGGAGGAGAAGTGAGGAACGATGATGTAGACCAAAGCTTGATC  | 780 |
| PB2 245626 Method K | 721 | GAGCAGATGTACACTCCGGGAGGAGAAGTGAGGAACGATGATGTAGACCAAAGCTTGATC  | 780 |
| PB2 245626 Method N | 721 | GAGCAGATGTACACTCCGGGAGGAGAAGTGAGGAACGATGATGTAGACCAAAGCTTGATC  | 780 |
|                     |     |                                                               |     |
| PB2 245625 MiSeq    | 781 | ATTGCTGCCAGGAATATAGTAAGAAGAGCAACGGTATCAGCAGATCCATTAGCATCTCTA  | 840 |
| PB2 245626 Method A | 781 | ATTGCTGCCAGGAATATAGTAAGAAGAGCAACGGTATCAGCAGATCCATTAGCATCTCTA  | 840 |
| PB2 245626 Method E | 781 | ATTGCTGCCAGGAATATAGTAAGAAGAGCAACGGTATCAGCAGATCCATTAGCATCTCTA  | 840 |
| PB2 245626 Method K | 781 | ATTGCTGCCAGGAATATAGTAAGAAGAGCAACGGTATCAGCAGATCCATTAGCATCTCTA  | 840 |
| PB2 245626 Method N | 781 | ATTGCTGCCAGGAATATAGTAAGAAGAGCAACGGTATCAGCAGATCCATTAGCATCTCTA  | 840 |
|                     |     |                                                               |     |
| PB2 245625 MiSeq    | 841 | TTGGAGATGTGTCACAGCACACAAATTGGGGGAATAAGGATGGTAGACATCCTTCGGCAA  | 900 |
| PB2 245626 Method A | 841 | TTGGAGATGTGTCACAGCACACAAATTGGGGGAATAAGGATGGTAGACATCCTTCGGCAA  | 900 |
| PB2 245626 Method E | 841 | TTGGAGATGTGTCACAGCACACAAATTGGGGGAATAAGGATGGTAGACATCCTTCGGCAA  | 900 |
| PB2 245626 Method K | 841 | TTGGAGATGTGTCACAGCACACAAATTGGGGGAATAAGGATGGTAGACATCCTTCGGCAA  | 900 |
| PB2 245626 Method N | 841 | TTGGAGATGTGTCACAGCACACAAATTGGGGGAATAAGGATGGTAGACATCCTTCGGCAA  | 900 |

|                     |     |                                                              |     |
|---------------------|-----|--------------------------------------------------------------|-----|
| PB2 245625 MiSeq    | 901 | AATCCAACAGAGGAACAAGCCGTGGATATATGCAAGGCAGCAATGGGCTTGAGGATTAGC | 960 |
| PB2 245626 Method A | 901 | AATCCAACAGAGGAACAAGCCGTGGATATATGCAAGGCAGCAATGGGCTTGAGGATTAGC | 960 |
| PB2 245626 Method E | 901 | AATCCAACAGAGGAACAAGCCGTGGATATATGCAAGGCAGCAATGGGCTTGAGGATTAGC | 960 |
| PB2 245626 Method K | 901 | AATCCAACAGAGGAACAAGCCGTGGATATATGCAAGGCAGCAATGGGCTTGAGGATTAGC | 960 |
| PB2 245626 Method N | 901 | AATCCAACAGAGGAACAAGCCGTGGATATATGCAAGGCAGCAATGGGCTTGAGGATTAGC | 960 |

|                     |     |                                                               |      |
|---------------------|-----|---------------------------------------------------------------|------|
| PB2 245625 MiSeq    | 961 | TCATCTTTTCAGCTTTGGTGGATTCACTTTTAAAAGAACAAGTGGATCGTCAGTCAAAAAA | 1020 |
| PB2 245626 Method A | 961 | TCATCTTTTCAGCTTTGGTGGATTCACTTTTAAAAGAACAAGTGGATCGTCAGTCAAAAAA | 1020 |
| PB2 245626 Method E | 961 | TCATCTTTTCAGCTTTGGTGGATTCACTTTTAAAAGAACAAGTGGATCGTCAGTCAAAAAA | 1020 |
| PB2 245626 Method K | 961 | TCATCTTTTCAGCTTTGGTGGATTCACTTTTAAAAGAACAAGTGGATCGTCAGTCAAAAAA | 1020 |
| PB2 245626 Method N | 961 | TCATCTTTTCAGCTTTGGTGGATTCACTTTTAAAAGAACAAGTGGATCGTCAGTCAAAAAA | 1020 |

|                     |      |                                                              |      |
|---------------------|------|--------------------------------------------------------------|------|
| PB2 245625 MiSeq    | 1021 | GAAGAAGAAGTGCTAACAGGCAACCTTCAAACATTGAAAATAAGAGTACATGAGGGGTAT | 1080 |
| PB2 245626 Method A | 1021 | GAAGAAGAAGTGCTAACAGGCAACCTTCAAACATTGAAAATAAGAGTACATGAGGGGTAT | 1080 |
| PB2 245626 Method E | 1021 | GAAGAAGAAGTGCTAACAGGCAACCTTCAAACATTGAAAATAAGAGTACATGAGGGGTAT | 1080 |
| PB2 245626 Method K | 1021 | GAAGAAGAAGTGCTAACAGGCAACCTTCAAACATTGAAAATAAGAGTACATGAGGGGTAT | 1080 |
| PB2 245626 Method N | 1021 | GAAGAAGAAGTGCTAACAGGCAACCTTCAAACATTGAAAATAAGAGTACATGAGGGGTAT | 1080 |

|                     |      |                                                              |      |
|---------------------|------|--------------------------------------------------------------|------|
| PB2 245625 MiSeq    | 1081 | GAAGAGTTTACAATGGTTGGGAGAAGAGCAACGGCCATTCTCAGGAAAGCAACCAGAAGG | 1140 |
| PB2 245626 Method A | 1081 | GAAGAGTTTACAATGGTTGGGAGAAGAGCAACGGCCATTCTCAGGAAAGCAACCAGAAGG | 1140 |
| PB2 245626 Method E | 1081 | GAAGAGTTTACAATGGTTGGGAGAAGAGCAACGGCCATTCTCAGGAAAGCAACCAGAAGG | 1140 |
| PB2 245626 Method K | 1081 | GAAGAGTTTACAATGGTTGGGAGAAGAGCAACGGCCATTCTCAGGAAAGCAACCAGAAGG | 1140 |
| PB2 245626 Method N | 1081 | GAAGAGTTTACAATGGTTGGGAGAAGAGCAACGGCCATTCTCAGGAAAGCAACCAGAAGG | 1140 |

|                     |      |                                                              |      |
|---------------------|------|--------------------------------------------------------------|------|
| PB2 245625 MiSeq    | 1141 | CTGATCCAGCTAATAGTAAGTGGGAGAGACGAGCAGTCAATTGCTGAAGCAATAATTGTG | 1200 |
| PB2 245626 Method A | 1141 | CTGATCCAGCTAATAGTAAGTGGGAGAGACGAGCAGTCAATTGCTGAAGCAATAATTGTG | 1200 |
| PB2 245626 Method E | 1141 | CTGATCCAGCTAATAGTAAGTGGGAGAGACGAGCAGTCAATTGCTGAAGCAATAATTGTG | 1200 |
| PB2 245626 Method K | 1141 | CTGATCCAGCTAATAGTAAGTGGGAGAGACGAGCAGTCAATTGCTGAAGCAATAATTGTG | 1200 |
| PB2 245626 Method N | 1141 | CTGATCCAGCTAATAGTAAGTGGGAGAGACGAGCAGTCAATTGCTGAAGCAATAATTGTG | 1200 |

|                            |      |                                                              |      |
|----------------------------|------|--------------------------------------------------------------|------|
| <b>PB2 245625 MiSeq</b>    | 1201 | GCAATGGTATTCTCACAAGAGGACTGCATGATTAAAGCAGTTAGAGGTGACCTGAATTTT | 1260 |
| <b>PB2 245626 Method A</b> | 1201 | GCAATGGTATTCTCACAAGAGGACTGCATGATTAAAGCAGTTAGAGGTGACCTGAATTTT | 1260 |
| <b>PB2 245626 Method E</b> | 1201 | GCAATGGTATTCTCACAAGAGGACTGCATGATTAAAGCAGTTAGAGGTGACCTGAATTTT | 1260 |
| <b>PB2 245626 Method K</b> | 1201 | GCAATGGTATTCTCACAAGAGGACTGCATGATTAAAGCAGTTAGAGGTGACCTGAATTTT | 1260 |
| <b>PB2 245626 Method N</b> | 1201 | GCAATGGTATTCTCACAAGAGGACTGCATGATTAAAGCAGTTAGAGGTGACCTGAATTTT | 1260 |

|                            |      |                                                              |      |
|----------------------------|------|--------------------------------------------------------------|------|
| <b>PB2 245625 MiSeq</b>    | 1261 | GTCAATAGGGCGAACCAGCGACTAAACCCAATGCATCAACTCTTGAGACATTTCCAAAAG | 1320 |
| <b>PB2 245626 Method A</b> | 1261 | GTCAATAGGGCGAACCAGCGACTAAACCCAATGCATCAACTCTTGAGACATTTCCAAAAG | 1320 |
| <b>PB2 245626 Method E</b> | 1261 | GTCAATAGGGCGAACCAGCGACTAAACCCAATGCATCAACTCTTGAGACATTTCCAAAAG | 1320 |
| <b>PB2 245626 Method K</b> | 1261 | GTCAATAGGGCGAACCAGCGACTAAACCCAATGCATCAACTCTTGAGACATTTCCAAAAG | 1320 |
| <b>PB2 245626 Method N</b> | 1261 | GTCAATAGGGCGAACCAGCGACTAAACCCAATGCATCAACTCTTGAGACATTTCCAAAAG | 1320 |

|                            |      |                                                               |      |
|----------------------------|------|---------------------------------------------------------------|------|
| <b>PB2 245625 MiSeq</b>    | 1321 | GATGCAAAGGTGCTTTTCCAAAATTGGGGGAATTGAACCCATTGACAATGTGATGGGAATG | 1380 |
| <b>PB2 245626 Method A</b> | 1321 | GATGCAAAGGTGCTTTTCCAAAATTGGGGGAATTGAACCCATTGACAATGTGATGGGAATG | 1380 |
| <b>PB2 245626 Method E</b> | 1321 | GATGCAAAGGTGCTTTTCCAAAATTGGGGGAATTGAACCCATTGACAATGTGATGGGAATG | 1380 |
| <b>PB2 245626 Method K</b> | 1321 | GATGCAAAGGTGCTTTTCCAAAATTGGGGGAATTGAACCCATTGACAATGTGATGGGAATG | 1380 |
| <b>PB2 245626 Method N</b> | 1321 | GATGCAAAGGTGCTTTTCCAAAATTGGGGGAATTGAACCCATTGACAATGTGATGGGAATG | 1380 |

|                            |      |                                                              |      |
|----------------------------|------|--------------------------------------------------------------|------|
| <b>PB2 245625 MiSeq</b>    | 1381 | ATCGGGATAATGCCCGACATGACCCCAAGTACTGAGATGTCGCTGAGGGGAATAAGAGTC | 1440 |
| <b>PB2 245626 Method A</b> | 1381 | ATCGGGATAATGCCCGACATGACCCCAAGTACTGAGATGTCGCTGAGGGGAATAAGAGTC | 1440 |
| <b>PB2 245626 Method E</b> | 1381 | ATCGGGATAATGCCCGACATGACCCCAAGTACTGAGATGTCGCTGAGGGGAATAAGAGTC | 1440 |
| <b>PB2 245626 Method K</b> | 1381 | ATCGGGATAATGCCCGACATGACCCCAAGTACTGAGATGTCGCTGAGGGGAATAAGAGTC | 1440 |
| <b>PB2 245626 Method N</b> | 1381 | ATCGGGATAATGCCCGACATGACCCCAAGTACTGAGATGTCGCTGAGGGGAATAAGAGTC | 1440 |

|                            |      |                                                              |      |
|----------------------------|------|--------------------------------------------------------------|------|
| <b>PB2 245625 MiSeq</b>    | 1441 | AGTAAGATGGGAGTAGATGAATACTCAAGTACAGAGCGAGTAGTAGTAAGCATCGACCGG | 1500 |
| <b>PB2 245626 Method A</b> | 1441 | AGTAAGATGGGAGTAGATGAATACTCAAGTACAGAGCGAGTAGTAGTAAGCATCGACCGG | 1500 |
| <b>PB2 245626 Method E</b> | 1441 | AGTAAGATGGGAGTAGATGAATACTCAAGTACAGAGCGAGTAGTAGTAAGCATCGACCGG | 1500 |
| <b>PB2 245626 Method K</b> | 1441 | AGTAAGATGGGAGTAGATGAATACTCAAGTACAGAGCGAGTAGTAGTAAGCATCGACCGG | 1500 |
| <b>PB2 245626 Method N</b> | 1441 | AGTAAGATGGGAGTAGATGAATACTCAAGTACAGAGCGAGTAGTAGTAAGCATCGACCGG | 1500 |

|                            |      |                                                              |      |
|----------------------------|------|--------------------------------------------------------------|------|
| <b>PB2 245625 MiSeq</b>    | 1501 | TTTTTAAGAGTTCGAGACCAACGGGGGAACGTACTATTATCACCCGAAGAGGTCAGTGAG | 1560 |
| <b>PB2 245626 Method A</b> | 1501 | TTTTTAAGAGTTCGAGACCAACGGGGGAACGTACTATTATCACCCGAAGAGGTCAGTGAG | 1560 |
| <b>PB2 245626 Method E</b> | 1501 | TTTTTAAGAGTTCGAGACCAACGGGGGAACGTACTATTATCACCCGAAGAGGTCAGTGAG | 1560 |
| <b>PB2 245626 Method K</b> | 1501 | TTTTTAAGAGTTCGAGACCAACGGGGGAACGTACTATTATCACCCGAAGAGGTCAGTGAG | 1560 |
| <b>PB2 245626 Method N</b> | 1501 | TTTTTAAGAGTTCGAGACCAACGGGGGAACGTACTATTATCACCCGAAGAGGTCAGTGAG | 1560 |

|                            |      |                                                              |      |
|----------------------------|------|--------------------------------------------------------------|------|
| <b>PB2 245625 MiSeq</b>    | 1561 | ACACAAGGAACGGAGAACTGACAATCACTTATTCGTCATCAATGATGTGGGAGATAAAAT | 1620 |
| <b>PB2 245626 Method A</b> | 1561 | AACAAGGAACGGAGAACTGACAATCACTTATTCGTCATCAATGATGTGGGAGATAAAAT  | 1620 |
| <b>PB2 245626 Method E</b> | 1561 | ACACAAGGAACGGAGAACTGACAATCACTTATTCGTCATCAATGATGTGGGAGATAAAAT | 1620 |
| <b>PB2 245626 Method K</b> | 1561 | ACACAAGGAACGGAGAACTGACAATCACTTATTCGTCATCAATGATGTGGGAGATAAAAT | 1620 |
| <b>PB2 245626 Method N</b> | 1561 | ACACAAGGAACGGAGAACTGACAATCACTTATTCGTCATCAATGATGTGGGAGATAAAAT | 1620 |

|                            |      |                                                             |      |
|----------------------------|------|-------------------------------------------------------------|------|
| <b>PB2 245625 MiSeq</b>    | 1621 | GGTCCTGAGTCTGTGTTGGTCAATACTTATCAGTGGATAATTAGAAACTGGGAACTGTA | 1680 |
| <b>PB2 245626 Method A</b> | 1621 | GGTCCTGAGTCTGTGTTGGTCAATACTTATCAGTGGATAATTAGAAACTGGGAACTGTA | 1680 |
| <b>PB2 245626 Method E</b> | 1621 | GGTCCTGAGTCTGTGTTGGTCAATACTTATCAGTGGATAATTAGAAACTGGGAACTGTA | 1680 |
| <b>PB2 245626 Method K</b> | 1621 | GGTCCTGAGTCTGTGTTGGTCAATACTTATCAGTGGATAATTAGAAACTGGGAACTGTA | 1680 |
| <b>PB2 245626 Method N</b> | 1621 | GGTCCTGAGTCTGTGTTGGTCAATACTTATCAGTGGATAATTAGAAACTGGGAACTGTA | 1680 |

|                            |      |                                                              |      |
|----------------------------|------|--------------------------------------------------------------|------|
| <b>PB2 245625 MiSeq</b>    | 1681 | AAAATTCAATGGTCACAGGATCCCACAATGTTGTATAATAAGATGGAATTCGAGCCATTC | 1740 |
| <b>PB2 245626 Method A</b> | 1681 | AAAATTCAATGGTCACAGGATCCCACAATGTTGTATAATAAGATGGAATTCGAGCCATTC | 1740 |
| <b>PB2 245626 Method E</b> | 1681 | AAAATTCAATGGTCACAGGATCCCACAATGTTGTATAATAAGATGGAATTCGAGCCATTC | 1740 |
| <b>PB2 245626 Method K</b> | 1681 | AAAATTCAATGGTCACAGGATCCCACAATGTTGTATAATAAGATGGAATTCGAGCCATTC | 1740 |
| <b>PB2 245626 Method N</b> | 1681 | AAAATTCAATGGTCACAGGATCCCACAATGTTGTATAATAAGATGGAATTCGAGCCATTC | 1740 |

|                            |      |                                                              |      |
|----------------------------|------|--------------------------------------------------------------|------|
| <b>PB2 245625 MiSeq</b>    | 1741 | CAGTCTCTAGTCCCTAAGGCAGCCAGAGGTCAATACAGTGGGTTTGTGAGAACACTATTC | 1800 |
| <b>PB2 245626 Method A</b> | 1741 | CAGTCTCTAGTCCCTAAGGCAGCCAGAGGTCAATACAGTGGGTTTGTGAGAACACTATTC | 1800 |
| <b>PB2 245626 Method E</b> | 1741 | CAGTCTCTAGTCCCTAAGGCAGCCAGAGGTCAATACAGTGGGTTTGTGAGAACACTATTC | 1800 |
| <b>PB2 245626 Method K</b> | 1741 | CAGTCTCTAGTCCCTAAGGCAGCCAGAGGTCAATACAGTGGGTTTGTGAGAACACTATTC | 1800 |
| <b>PB2 245626 Method N</b> | 1741 | CAGTCTCTAGTCCCTAAGGCAGCCAGAGGTCAATACAGTGGGTTTGTGAGAACACTATTC | 1800 |

|                            |      |                                                              |      |
|----------------------------|------|--------------------------------------------------------------|------|
| <b>PB2 245625 MiSeq</b>    | 1801 | CAGCAAATGCGAGATGTGCTTGGAACATTTGACACTGTTTCAGATAATAAACTCCTCCCC | 1860 |
| <b>PB2 245626 Method A</b> | 1801 | CAGCAAATGCGAGATGTGCTTGGAACATTTGACACTGTTTCAGATAATAAACTCCTCCCC | 1860 |
| <b>PB2 245626 Method E</b> | 1801 | CAGCAAATGCGAGATGTGCTTGGAACATTTGACACTGTTTCAGATAATAAACTCCTCCCC | 1860 |
| <b>PB2 245626 Method K</b> | 1801 | CAGCAAATGCGAGATGTGCTTGGAACATTTGACACTGTTTCAGATAATAAACTCCTCCCC | 1860 |
| <b>PB2 245626 Method N</b> | 1801 | CAGCAAATGCGAGATGTGCTTGGAACATTTGACACTGTTTCAGATAATAAACTCCTCCCC | 1860 |

|                            |      |                                                              |      |
|----------------------------|------|--------------------------------------------------------------|------|
| <b>PB2 245625 MiSeq</b>    | 1861 | TTTGCTACCGCCCCACCGGAACAAAGTAGGATGCAGTTCTCCTCCCTGACTGTGAATGTA | 1920 |
| <b>PB2 245626 Method A</b> | 1861 | TTTGCTACCGCCCCACCGGAACAAAGTAGGATGCAGTTCTCCTCCCTGACTGTGAATGTA | 1920 |
| <b>PB2 245626 Method E</b> | 1861 | TTTGCTACCGCCCCACCGGAACAAAGTAGGATGCAGTTCTCCTCCCTGACTGTGAATGTA | 1920 |
| <b>PB2 245626 Method K</b> | 1861 | TTTGCTACCGCCCCACCGGAACAAAGTAGGATGCAGTTCTCCTCCCTGACTGTGAATGTA | 1920 |
| <b>PB2 245626 Method N</b> | 1861 | TTTGCTACCGCCCCACCGGAACAAAGTAGGATGCAGTTCTCCTCCCTGACTGTGAATGTA | 1920 |

|                            |      |                                                              |      |
|----------------------------|------|--------------------------------------------------------------|------|
| <b>PB2 245625 MiSeq</b>    | 1921 | AGAGGATCAGGAATGAGGATACTGGTAAGAGGCAATTCACCAGTGTTCAATTACAACAAG | 1980 |
| <b>PB2 245626 Method A</b> | 1921 | AGAGGATCAGGAATGAGGATACTGGTAAGAGGCAATTCACCAGTGTTCAATTACAACAAG | 1980 |
| <b>PB2 245626 Method E</b> | 1921 | AGAGGATCAGGAATGAGGATACTGGTAAGAGGCAATTCACCAGTGTTCAATTACAACAAG | 1980 |
| <b>PB2 245626 Method K</b> | 1921 | AGAGGATCAGGAATGAGGATACTGGTAAGAGGCAATTCACCAGTGTTCAATTACAACAAG | 1980 |
| <b>PB2 245626 Method N</b> | 1921 | AGAGGATCAGGAATGAGGATACTGGTAAGAGGCAATTCACCAGTGTTCAATTACAACAAG | 1980 |

|                            |      |                                                              |      |
|----------------------------|------|--------------------------------------------------------------|------|
| <b>PB2 245625 MiSeq</b>    | 1981 | GCCACCAAGAGGCTCACAGTTCTCGGGAAAGATGCAGGTGCATTGACCGAAGATCCAGAT | 2040 |
| <b>PB2 245626 Method A</b> | 1981 | GCCACCAAGAGGCTCACAGTTCTCGGGAAAGATGCAGGTGCATTGACCGAAGATCCAGAT | 2040 |
| <b>PB2 245626 Method E</b> | 1981 | GCCACCAAGAGGCTCACAGTTCTCGGGAAAGATGCAGGTGCATTGACCGAAGATCCAGAT | 2040 |
| <b>PB2 245626 Method K</b> | 1981 | GCCACCAAGAGGCTCACAGTTCTCGGGAAAGATGCAGGTGCATTGACCGAAGATCCAGAT | 2040 |
| <b>PB2 245626 Method N</b> | 1981 | GCCACCAAGAGGCTCACAGTTCTCGGGAAAGATGCAGGTGCATTGACCGAAGATCCAGAT | 2040 |

|                            |      |                                                              |      |
|----------------------------|------|--------------------------------------------------------------|------|
| <b>PB2 245625 MiSeq</b>    | 2041 | GAAGGCACAGCTGGAGTGGAGTCTGCTGTTTTAAGAGGATTCCTCATTTTGGGCAAAGAA | 2100 |
| <b>PB2 245626 Method A</b> | 2041 | GAAGGCACAGCTGGAGTGGAGTCTGCTGTTTTAAGAGGATTCCTCATTTTGGGCAAAGAA | 2100 |
| <b>PB2 245626 Method E</b> | 2041 | GAAGGCACAGCTGGAGTGGAGTCTGCTGTTTTAAGAGGATTCCTCATTTTGGGCAAAGAA | 2100 |
| <b>PB2 245626 Method K</b> | 2041 | GAAGGCACAGCTGGAGTGGAGTCTGCTGTTTTAAGAGGATTCCTCATTTTGGGCAAAGAA | 2100 |
| <b>PB2 245626 Method N</b> | 2041 | GAAGGCACAGCTGGAGTGGAGTCTGCTGTTTTAAGAGGATTCCTCATTTTGGGCAAAGAA | 2100 |

|                            |      |                                                              |      |
|----------------------------|------|--------------------------------------------------------------|------|
| <b>PB2 245625 MiSeq</b>    | 2101 | GACAAGAGATATGGCCCAGCATTGAGCATCAATGAGCTGAGCAATCTTGCAAAGGGAGAG | 2160 |
| <b>PB2 245626 Method A</b> | 2101 | GACAAGAGATATGGCCCAGCATTGAGCATCAATGAGCTGAGCAATCTTGCAAAGGGAGAG | 2160 |
| <b>PB2 245626 Method E</b> | 2101 | GACAAGAGATATGGCCCAGCATTGAGCATCAATGAGCTGAGCAATCTTGCAAAGGGAGAG | 2160 |
| <b>PB2 245626 Method K</b> | 2101 | GACAAGAGATATGGCCCAGCATTGAGCATCAATGAGCTGAGCAATCTTGCAAAGGGAGAG | 2160 |
| <b>PB2 245626 Method N</b> | 2101 | GACAAGAGATATGGCCCAGCATTGAGCATCAATGAGCTGAGCAATCTTGCAAAGGGAGAG | 2160 |

|                            |      |                                                              |      |
|----------------------------|------|--------------------------------------------------------------|------|
| <b>PB2 245625 MiSeq</b>    | 2161 | AAGGCTAATGTGCTAATTGGGCAAGGAGACGTAGTGTTGGTGATGAAACGGAAACGGGAC | 2220 |
| <b>PB2 245626 Method A</b> | 2161 | AAGGCTAATGTGCTAATTGGGCAAGGAGACGTAGTGTTGGTGATGAAACGGAAACGGGAC | 2220 |
| <b>PB2 245626 Method E</b> | 2161 | AAGGCTAATGTGCTAATTGGGCAAGGAGACGTAGTGTTGGTGATGAAACGGAAACGGGAC | 2220 |
| <b>PB2 245626 Method K</b> | 2161 | AAGGCTAATGTGCTAATTGGGCAAGGAGACGTAGTGTTGGTGATGAAACGGAAACGGGAC | 2220 |
| <b>PB2 245626 Method N</b> | 2161 | AAGGCTAATGTGCTAATTGGGCAAGGAGACGTAGTGTTGGTGATGAAACGGAAACGGGAC | 2220 |

|                            |      |                                                              |      |
|----------------------------|------|--------------------------------------------------------------|------|
| <b>PB2 245625 MiSeq</b>    | 2221 | TCTAGCATACTTACTGACAGCCAGACAGCGACCAAAAGAATTCGGATGGCCATCAATTAG | 2280 |
| <b>PB2 245626 Method A</b> | 2221 | TCTAGCATACTTACTGACAGCCAGACAGCGACCAAAAGAATTCGGATGGCCATCAATTAG | 2280 |
| <b>PB2 245626 Method E</b> | 2221 | TCTAGCATACTTACTGACAGCCAGACAGCGACCAAAAGAATTCGGATGGCCATCAATTAG | 2280 |
| <b>PB2 245626 Method K</b> | 2221 | TCTAGCATACTTACTGACAGCCAGACAGCGACCAAAAGAATTCGGATGGCCATCAATTAG | 2280 |
| <b>PB2 245626 Method N</b> | 2221 | TCTAGCATACTTACTGACAGCCAGACAGCGACCAAAAGAATTCGGATGGCCATCAATTAG | 2280 |
