# Supplementary material for: An Evaluation of Avian Influenza Virus Whole Genome Sequencing Approaches Using Nanopore Technology
Source: Preprints.org preprint supplement (doi:10.20944/preprints202301.0480.v1), 2023-01-26
Supplement: Supplementary file 20 [file supplementary]

## Formatted Alignments

|                           |   |                                                               |    |
|---------------------------|---|---------------------------------------------------------------|----|
| <b>MA 245467 MiSeq</b>    | 1 | ATGAGTCTTCTAACCGAGGTCGAAACGTACGTTCTCTCTATCGTCCCGTCGGGGCCCCCTC | 60 |
| <b>MA 245467 Method A</b> | 1 | ATGAGTCTTCTAACCGAGGTCGAAACGTACGTTCTCTCTATCGTCCCGTCGGGGCCCCCTC | 60 |
| <b>MA 245467 Method S</b> | 1 | ATGAGTCTTCTAACCGAGGTCGAAACGTACGTTCTCTCTATCGTCCCGTCGGGGCCCCCTC | 60 |
| <b>MA 245467 Method E</b> | 1 | ATGAGTCTTCTAACCGAGGTCGAAACGTACGTTCTCTCTATCGTCCCGTCGGGGCCCCCTC | 60 |
| <b>MA 245467 Method K</b> | 1 | ATGAGTCTTCTAACCGAGGTCGAAACGTACGTTCTCTCTATCGTCCCGTCGGGGCCCCCTC | 60 |
| <b>MA 245467 Method N</b> | 1 | ATGAGTCTTCTAACCGAGGTCGAAACGTACGTTCTCTCTATCGTCCCGTCGGGGCCCCCTC | 60 |

|                           |    |                                                              |     |
|---------------------------|----|--------------------------------------------------------------|-----|
| <b>MA 245467 MiSeq</b>    | 61 | AAAGCCGAGATCGCGCAGAGACTTGAAGATGTCTTTGCAGGGAAGAACACCGATCTTGAG | 120 |
| <b>MA 245467 Method A</b> | 61 | AAAGCCGAGATCGCGCAGAGACTTGAAGATGTCTTTGCAGGGAAGAACACCGATCTTGAG | 120 |
| <b>MA 245467 Method S</b> | 61 | AAAGCCGAGATCGCGCAGAGACTTGAAGATGTCTTTGCAGGGAAGAACACCGATCTTGAG | 120 |
| <b>MA 245467 Method E</b> | 61 | AAAGCCGAGATCGCGCAGAGACTTGAAGATGTCTTTGCAGGGAAGAACACCGATCTTGAG | 120 |
| <b>MA 245467 Method K</b> | 61 | AAAGCCGAGATCGCGCAGAGACTTGAAGATGTCTTTGCAGGGAAGAACACCGATCTTGAG | 120 |
| <b>MA 245467 Method N</b> | 61 | AAAGCCGAGATCGCGCAGAGACTTGAAGATGTCTTTGCAGGGAAGAACACCGATCTTGAG | 120 |

|                           |     |                                                             |     |
|---------------------------|-----|-------------------------------------------------------------|-----|
| <b>MA 245467 MiSeq</b>    | 121 | GCTCTCATGGAATGGCTAAAGACAAGACCAATCCTGTACCTCTGACTAAGGGGATTTTG | 180 |
| <b>MA 245467 Method A</b> | 121 | GCTCTCATGGAATGGCTAAAGACAAGACCAATCCTGTACCTCTGACTAAGGGGATTTTG | 180 |
| <b>MA 245467 Method S</b> | 121 | GCTCTCATGGAATGGCTAAAGACAAGACCAATCCTGTACCTCTGACTAAGGGGATTTTG | 180 |
| <b>MA 245467 Method E</b> | 121 | GCTCTCATGGAATGGCTAAAGACAAGACCAATCCTGTACCTCTGACTAAGGGGATTTTG | 180 |
| <b>MA 245467 Method K</b> | 121 | GCTCTCATGGAATGGCTAAAGACAAGACCAATCCTGTACCTCTGACTAAGGGGATTTTG | 180 |
| <b>MA 245467 Method N</b> | 121 | GCTCTCATGGAATGGCTAAAGACAAGACCAATCCTGTACCTCTGACTAAGGGGATTTTG | 180 |

|                           |     |                                                              |     |
|---------------------------|-----|--------------------------------------------------------------|-----|
| <b>MA 245467 MiSeq</b>    | 181 | GGATTTGTGTTACAGCTCACCGTGCCCAGTGAGCGAGGACTGCAGCGTAGACGCTTTGTC | 240 |
| <b>MA 245467 Method A</b> | 181 | GGATTTGTGTTACAGCTCACCGTGCCCAGTGAGCGAGGACTGCAGCGTAGACGCTTTGTC | 240 |
| <b>MA 245467 Method S</b> | 181 | GGATTTGTGTTACAGCTCACCGTGCCCAGTGAGCGAGGACTGCAGCGTAGACGCTTTGTC | 240 |
| <b>MA 245467 Method E</b> | 181 | GGATTTGTGTTACAGCTCACCGTGCCCAGTGAGCGAGGACTGCAGCGTAGACGCTTTGTC | 240 |
| <b>MA 245467 Method K</b> | 181 | GGATTTGTGTTACAGCTCACCGTGCCCAGTGAGCGAGGACTGCAGCGTAGACGCTTTGTC | 240 |
| <b>MA 245467 Method N</b> | 181 | GGATTTGTGTTACAGCTCACCGTGCCCAGTGAGCGAGGACTGCAGCGTAGACGCTTTGTC | 240 |

|                           |     |                                                              |     |
|---------------------------|-----|--------------------------------------------------------------|-----|
| <b>MA 245467 MiSeq</b>    | 241 | CAAAATGCTCTAAATGGAAATGGAGACCCAAACAACATGGACAGGGCAGTCAAGTTGTAC | 300 |
| <b>MA 245467 Method A</b> | 241 | CAAAATGCTCTAAATGGAAATGGAGACCCAAACAACATGGACAGGGCAGTCAAGTTGTAC | 300 |
| <b>MA 245467 Method S</b> | 241 | CAAAATGCTCTAAATGGAAATGGAGACCCAAACAACATGGACAGGGCAGTCAAAAC     | 300 |
| <b>MA 245467 Method E</b> | 241 | CAAAATGCTCTAAATGGAAATGGAGACCCAAACAACATGGACAGGGCAGTCAAGTTGTAC | 300 |
| <b>MA 245467 Method K</b> | 241 | CAAAATGCTCTAAATGGAAATGGAGACCCAAACAACATGGACAGGGCAGTCAAGTTGTAC | 300 |
| <b>MA 245467 Method N</b> | 241 | CAAAATGCTCTAAATGGAAATGGAGACCCAAACAACATGGACAGGGCAGTCAAGTTGTAC | 300 |

|                           |     |                                                                |     |
|---------------------------|-----|----------------------------------------------------------------|-----|
| <b>MA 245467 MiSeq</b>    | 301 | AGGAAATTGAAGAGAGAGATAACATTCCATGGGGCTAAAGAAGTTGCACTCAGTTACTCA   | 360 |
| <b>MA 245467 Method A</b> | 301 | AGGAAATTGAAGAGAGAGAGATAACATTCCATGGGGCTAAAGAAGTTGCACTCAGTTACTCA | 360 |
| <b>MA 245467 Method S</b> | 301 | AGGAAATTGAAGAGAGAGAGATAACATTCCATGGGGCTAAAGAAGTTGCACTCAGTTACTCA | 360 |
| <b>MA 245467 Method E</b> | 301 | AGGAAATTGAAGAGAGAGAGATAACATTCCATGGGGCTAAAGAAGTTGCACTCAGTTACTCA | 360 |
| <b>MA 245467 Method K</b> | 301 | AGGAAATTGAAGAGAGAGAGATAACATTCCATGGGGCTAAAGAAGTTGCACTCAGTTACTCA | 360 |
| <b>MA 245467 Method N</b> | 301 | AGGAAATTGAAGAGAGAGAGATAACATTCCATGGGGCTAAAGAAGTTGCACTCAGTTACTCA | 360 |

|                           |     |                                                              |     |
|---------------------------|-----|--------------------------------------------------------------|-----|
| <b>MA 245467 MiSeq</b>    | 361 | ACCGGTGCACTTGCCAGTTGTATGGGTCTCATATACAACAGGATGGGGACGGTGACCGCA | 420 |
| <b>MA 245467 Method A</b> | 361 | ACCGGTGCACTTGCCAGTTGTATGGGTCTCATATACAACAGGATGGGGACGGTGACCGCA | 420 |
| <b>MA 245467 Method S</b> | 361 | ACCGGTGCACTTGCCAGTTGTATGGGTCTCATATACAACAGGATGGGGACGGTGACCGCA | 420 |
| <b>MA 245467 Method E</b> | 361 | ACCGGTGCACTTGCCAGTTGTATGGGTCTCATATACAACAGGATGGGGACGGTGACCGCA | 420 |
| <b>MA 245467 Method K</b> | 361 | ACCGGTGCACTTGCCAGTTGTATGGGTCTCATATACAACAGGATGGGGACGGTGACCGCA | 420 |
| <b>MA 245467 Method N</b> | 361 | ACCGGTGCACTTGCCAGTTGTATGGGTCTCATATACAACAGGATGGGGACGGTGACCGCA | 420 |

|                           |     |                                                              |     |
|---------------------------|-----|--------------------------------------------------------------|-----|
| <b>MA 245467 MiSeq</b>    | 421 | GAAGTGGCATTGGGCCTAGTGTGTGCCACCTGTGAGCAGATTGCTGATTCACAGCATCGG | 480 |
| <b>MA 245467 Method A</b> | 421 | GAAGTGGCATTGGGCCTAGTGTGTGCCACCTGTGAGCAGATTGCTGATTCACAGCATCGG | 480 |
| <b>MA 245467 Method S</b> | 421 | GAAGTGGCATTGGGCCTAGTGTGTGCCACCTGTGAGCAGATTGCTGATTCACAGCATCGG | 480 |
| <b>MA 245467 Method E</b> | 421 | GAAGTGGCATTGGGCCTAGTGTGTGCCACCTGTGAGCAGATTGCTGATTCACAGCATCGG | 480 |
| <b>MA 245467 Method K</b> | 421 | GAAGTGGCATTGGGCCTAGTGTGTGCCACCTGTGAGCAGATTGCTGATTCACAGCATCGG | 480 |
| <b>MA 245467 Method N</b> | 421 | GAAGTGGCATTGGGCCTAGTGTGTGCCACCTGTGAGCAGATTGCTGATTCACAGCATCGG | 480 |

|                           |     |                                                              |     |
|---------------------------|-----|--------------------------------------------------------------|-----|
| <b>MA 245467 MiSeq</b>    | 481 | TCTCACAGACAGATAGCTACCACCACCAACCCACTGATCAGACATGAAAACAGAATGGTG | 540 |
| <b>MA 245467 Method A</b> | 481 | TCTCACAGACAGATAGCTACCACCACCAACCCACTGATCAGACATGAAAACAGAATGGTG | 540 |
| <b>MA 245467 Method S</b> | 481 | TCTCACAGACAGATAGCTACCACCACCAACCCACTAATCAGACATGAAAACAGAATGGTG | 540 |
| <b>MA 245467 Method E</b> | 481 | TCTCACAGACAGATAGCTACCACCACCAACCCACTGATCAGACATGAAAACAGAATGGTG | 540 |
| <b>MA 245467 Method K</b> | 481 | TCTCACAGACAGATAGCTACCACCACCAACCCACTGATCAGACATGAAAACAGAATGGTG | 540 |
| <b>MA 245467 Method N</b> | 481 | TCTCACAGACAGATAGCTACCACCACCAACCCACTGATCAGACATGAAAACAGAATGGTG | 540 |

|                           |     |                                                              |     |
|---------------------------|-----|--------------------------------------------------------------|-----|
| <b>MA 245467 MiSeq</b>    | 541 | TTGGCCAGTACTACAGCTAAGGCTATGGAGCAGATGGCTGGATCGAGTGAGCAAGCAGTG | 600 |
| <b>MA 245467 Method A</b> | 541 | TTGGCCAGTACTACAGCTAAGGCTATGGAGCAGATGGCTGGATCGAGTGAGCAAGCAGTG | 600 |
| <b>MA 245467 Method S</b> | 541 | TTGGCCAGTACTACAGCTAAGGCTATGGAGCAGATGGCTGGATCGAGTGAGCAAGCAGTG | 600 |
| <b>MA 245467 Method E</b> | 541 | TTGGCCAGTACTACAGCTAAGGCTATGGAGCAGATGGCTGGATCGAGTGAGCAAGCAGTG | 600 |
| <b>MA 245467 Method K</b> | 541 | TTGGCCAGTACTACAGCTAAGGCTATGGAGCAGATGGCTGGATCGAGTGAGCAAGCAGTG | 600 |
| <b>MA 245467 Method N</b> | 541 | TTGGCCAGTACTACAGCTAAGGCTATGGAGCAGATGGCTGGATCGAGTGAGCAAGCAGTG | 600 |

|                           |     |                                                              |     |
|---------------------------|-----|--------------------------------------------------------------|-----|
| <b>MA 245467 MiSeq</b>    | 601 | GAGGCCATGGAGGTTGCTAGTCAGGCTAGGCAGATGGTGCAGGCGATGAGGACCATTGGA | 660 |
| <b>MA 245467 Method A</b> | 601 | GAGGCCATGGAGGTTGCTAGTCAGGCTAGGCAGATGGTGCAGGCGATGAGGACCATTGGA | 660 |
| <b>MA 245467 Method S</b> | 601 | GAGGCCATGGAGGTTGCTAGTCAGGCTAGGCAGATGGTGCAGGCGATGAGGACCATTGGA | 660 |
| <b>MA 245467 Method E</b> | 601 | GAGGCCATGGAGGTTGCTAGTCAGGCTAGGCAGATGGTGCAGGCGATGAGGACCATTGGA | 660 |
| <b>MA 245467 Method K</b> | 601 | GAGGCCATGGAGGTTGCTAGTCAGGCTAGGCAGATGGTGCAGGCGATGAGGACCATTGGA | 660 |
| <b>MA 245467 Method N</b> | 601 | GAGGCCATGGAGGTTGCTAGTCAGGCTAGGCAGATGGTGCAGGCGATGAGGACCATTGGA | 660 |

|                           |     |                                                              |     |
|---------------------------|-----|--------------------------------------------------------------|-----|
| <b>MA 245467 MiSeq</b>    | 661 | ACTCATCCTAGCTCCAGTGCCGGTCTGAGAGATGATCTCCTTGAAAATTTGCAGGCCTAC | 720 |
| <b>MA 245467 Method A</b> | 661 | ACTCATCCTAGCTCCAGTGCCGGTCTGAGAGATGATCTCCTTGAAAATTTGCAGGCCTAC | 720 |
| <b>MA 245467 Method S</b> | 661 | ACTCATCCTAGCTCCAGTGCCGGTCTGAGAGATGATCTCCTTGAAAATTTGCAGGCCTAC | 720 |
| <b>MA 245467 Method E</b> | 661 | ACTCATCCTAGCTCCAGTGCCGGTCTGAGAGATGATCTCCTTGAAAATTTGCAGGCCTAC | 720 |
| <b>MA 245467 Method K</b> | 661 | ACTCATCCTAGCTCCAGTGCCGGTCTGAGAGATGATCTCCTTGAAAATTTGCAGGCCTAC | 720 |
| <b>MA 245467 Method N</b> | 661 | ACTCATCCTAGCTCCAGTGCCGGTCTGAGAGATGATCTCCTTGAAAATTTGCAGGCCTAC | 720 |

|                           |     |                                                              |     |
|---------------------------|-----|--------------------------------------------------------------|-----|
| <b>MA 245467 MiSeq</b>    | 721 | CAAAAACGGATGGGAGTGCAACTGCAGCGATTCAAGTGATCCTCTCGTTATTGCCGCAAG | 780 |
| <b>MA 245467 Method A</b> | 721 | CAAAAACGGATGGGAGTGCAACTGCAGCGATTCAAGTGATCCTCTCGTTATTGCCGCAAG | 780 |
| <b>MA 245467 Method S</b> | 721 | CAAAAACGGATGGGAGTGCAACTGCAGCGATTCAAGTGATCCTCTCGTTATTGCCGCAAG | 780 |
| <b>MA 245467 Method E</b> | 721 | CAAAAACGGATGGGAGTGCAACTGCAGCGATTCAAGTGATCCTCTCGTTATTGCCGCAAG | 780 |
| <b>MA 245467 Method K</b> | 721 | CAAAAACGGATGGGAGTGCAACTGCAGCGATTCAAGTGATCCTCTCGTTATTGCCGCAAG | 780 |
| <b>MA 245467 Method N</b> | 721 | CAAAAACGGATGGGAGTGCAACTGCAGCGATTCAAGTGATCCTCTCGTTATTGCCGCAAG | 780 |

|                           |     |                                                              |     |
|---------------------------|-----|--------------------------------------------------------------|-----|
| <b>MA 245467 MiSeq</b>    | 781 | TATCATTGGGATCTTGCACTTGATATTGTGGATTCTTGATCGCCTTTTCTTCAAATGCGT | 840 |
| <b>MA 245467 Method A</b> | 781 | TATCATTGGGATCTTGCACTTGATATTGTGGATTCTTGATCGCCTTTTCTTCAAATGCGT | 840 |
| <b>MA 245467 Method S</b> | 781 | TATCATTGGGATCTTGCACTTGATATTGTGGATTCTTGATCGCCTTTTCTTCAAATGCGT | 840 |
| <b>MA 245467 Method E</b> | 781 | TATCATTGGGATCTTGCACTTGATATTGTGGATTCTTGATCGCCTTTTCTTCAAATGCGT | 840 |
| <b>MA 245467 Method K</b> | 781 | TATCATTGGGATCTTGCACTTGATATTGTGGATTCTTGATCGCCTTTTCTTCAAATGCGT | 840 |
| <b>MA 245467 Method N</b> | 781 | TATCATTGGGATCTTGCACTTGATATTGTGGATTCTTGATCGCCTTTTCTTCAAATGCGT | 840 |

|                           |     |                                                              |     |
|---------------------------|-----|--------------------------------------------------------------|-----|
| <b>MA 245467 MiSeq</b>    | 841 | TTATCGTCGCCTTAAATACGGTTTGAAAGGAGGGCCTTCTACGGAAGGAGTACCTGAGTC | 900 |
| <b>MA 245467 Method A</b> | 841 | TTATCGTCGCCTTAAATACGGTTTGAAAGGAGGGCCTTCTACGGAAGGAGTACCTGAGTC | 900 |
| <b>MA 245467 Method S</b> | 841 | TTATCGTCGCCTTAAATACGGTTTGAAAGGAGGGCCTTCTACGGAAGGAGTACCTGAGTC | 900 |
| <b>MA 245467 Method E</b> | 841 | TTATCGTCGCCTTAAATACGGTTTGAAAGGAGGGCCTTCTACGGAAGGAGTACCTGAGTC | 900 |
| <b>MA 245467 Method K</b> | 841 | TTATCGTCGCCTTAAATACGGTTTGAAAGGAGGGCCTTCTACGGAAGGAGTACCTGAGTC | 900 |
| <b>MA 245467 Method N</b> | 841 | TTATCGTCGCCTTAAATACGGTTTGAAAGGAGGGCCTTCTACGGAAGGAGTACCTGAGTC | 900 |

|                           |     |                                                              |     |
|---------------------------|-----|--------------------------------------------------------------|-----|
| <b>MA 245467 MiSeq</b>    | 901 | CATGAGGGAAGAGTACCGGCAGGAACAGCAGAGTGCTGTGGATGTTGACGATGGTCATTT | 960 |
| <b>MA 245467 Method A</b> | 901 | CATGAGGGAAGAGTACCGGCAGGAACAGCAGAGTGCTGTGGATGTTGACGATGGTCATTT | 960 |
| <b>MA 245467 Method S</b> | 901 | CATGAGGGAAGAGTACCGGCAGGAACAGCAGAGTGCTGTGGATGTTGACGATGGTCATTT | 960 |
| <b>MA 245467 Method E</b> | 901 | CATGAGGGAAGAGTACCGGCAGGAACAGCAGAGTGCTGTGGATGTTGACGATGGTCATTT | 960 |
| <b>MA 245467 Method K</b> | 901 | CATGAGGGAAGAGTACCGGCAGGAACAGCAGAGTGCTGTGGATGTTGACGATGGTCATTT | 960 |
| <b>MA 245467 Method N</b> | 901 | CATGAGGGAAGAGTACCGGCAGGAACAGCAGAGTGCTGTGGATGTTGACGATGGTCATTT | 960 |

|                           |            |                        |            |
|---------------------------|------------|------------------------|------------|
| <b>MA 245467 MiSeq</b>    | <i>961</i> | TGTCAACATAGAGCTGGAGTAA | <i>982</i> |
| <b>MA 245467 Method A</b> | <i>961</i> | TGTCAACATAGAGCTGGAGTAA | <i>982</i> |
| <b>MA 245467 Method S</b> | <i>961</i> | TGTCAACATAGAGCTGGAGTAA | <i>982</i> |
| <b>MA 245467 Method E</b> | <i>961</i> | TGTCAACATAGAGCTGGAGTAA | <i>982</i> |
| <b>MA 245467 Method K</b> | <i>961</i> | TGTCAACATAGAGCTGGAGTAA | <i>982</i> |
| <b>MA 245467 Method N</b> | <i>961</i> | TGTCAACATAGAGCTGGAGTAA | <i>982</i> |
