# Supplementary material for: An Evaluation of Avian Influenza Virus Whole Genome Sequencing Approaches Using Nanopore Technology
Source: Preprints.org preprint supplement (doi:10.20944/preprints202301.0480.v1), 2023-01-26
Supplement: Supplementary file 21 [file supplementary]

## Formatted Alignments

|                    |     |                                                                |     |
|--------------------|-----|----------------------------------------------------------------|-----|
| N1 245625 MiSeq    | 1   | ATGAATCCAAATCAAAAAGATAACAACCATTTGGATCAATCTGTATGGTAATTGGGATAGTC | 60  |
| N1 245626 Method A | 1   | ATGAATCCAAATCAAAAAGATAACAACCATTTGGATCAATCTGTATGGTAATTGGGATAGTC | 60  |
| N1 245626 Method S | 1   | ATGAATCCAAATCAAAAAGATAACAACCATTTGGATCAATCTGTATGGTAATTGGGATAGTC | 60  |
| N1 245626 Method K | 1   | ATGAATCCAAATCAAAAAGATAACAACCATTTGGATCAATCTGTATGGTAATTGGGATAGTC | 60  |
| N1 245626 Method N | 1   | ATGAATCCAAATCAAAAAGATAACAACCATTTGGATCAATCTGTATGGTAATTGGGATAGTC | 60  |
|                    |     |                                                                |     |
| N1 245625 MiSeq    | 61  | AGCTTGATGCTGCAAATTGGGAACATAATCTCAATATGGGTTAGCCATTCAATCCAAACA   | 120 |
| N1 245626 Method A | 61  | AGCTTGATGCTGCAAATTGGGAACATAATCTCAATATGGGTTAGCCATTCAATCCAAACA   | 120 |
| N1 245626 Method S | 61  | AGCTTGATGCTGCAAATTGGGAACATAATCTCAATATGGGTTAGCCATTCAATCCAAACA   | 120 |
| N1 245626 Method K | 61  | AGCTTGATGCTGCAAATTGGGAACATAATCTCAATATGGGTTAGCCATTCAATCCAAACA   | 120 |
| N1 245626 Method N | 61  | AGCTTGATGCTGCAAATTGGGAACATAATCTCAATATGGGTTAGCCATTCAATCCAAACA   | 120 |
|                    |     |                                                                |     |
| N1 245625 MiSeq    | 121 | GGGAATCAATACCAGCCTGAACCATGCAATCAAAGCATCATTACCTATGAGAACAACACC   | 180 |
| N1 245626 Method A | 121 | GGGAATCAATACCAGCCTGAACCATGCAATCAAAGCATCATTACCTATGAGAACAACACC   | 180 |
| N1 245626 Method S | 121 | GGGAATCAATACCAGCCTGAACCATGCAATCAAAGCATCATTACCTATGAGAACAACACC   | 180 |
| N1 245626 Method K | 121 | GGGAATCAATACCAGCCTGAACCATGCAATCAAAGCATCATTACCTATGAGAACAACACC   | 180 |
| N1 245626 Method N | 121 | GGGAATCAATACCAGCCTGAACCATGCAATCAAAGCATCATTACCTATGAGAACAACACC   | 180 |
|                    |     |                                                                |     |
| N1 245625 MiSeq    | 181 | TGGGTAAATCAGACGTATGTCAACATCAGCAATACCAATTTTCTTGCTGAGCAGGCTGTT   | 240 |
| N1 245626 Method A | 181 | TGGGTAAATCAGACGTATGTCAACATCAGCAATACCAATTTTCTTGCTGAGCAGGCTGTT   | 240 |
| N1 245626 Method S | 181 | TGGGTAAATCAGACGTATGTCAACATCAGCAATACCAATTTTCTTGCTGAGCAGGCTGTT   | 240 |
| N1 245626 Method K | 181 | TGGGTAAATCAGACGTATGTCAACATCAGCAATACCAATTTTCTTGCTGAGCAGGCTGTT   | 240 |
| N1 245626 Method N | 181 | TGGGTAAATCAGACGTATGTCAACATCAGCAATACCAATTTTCTTGCTGAGCAGGCTGTT   | 240 |
|                    |     |                                                                |     |
| N1 245625 MiSeq    | 241 | ACTTCGGTAACATTAGCGGGCAATTCATCTCTTTGCCCTATTAGTGGGTGGGCAATATAC   | 300 |
| N1 245626 Method A | 241 | ACTTCGGTAACATTAGCGGGCAATTCATCTCTTTGCCCTATTAGTGGGTGGGCAATATAC   | 300 |
| N1 245626 Method S | 241 | ACTTCGGTAACATTAGCGGGCAATTCATCTCTTTGCCCTATTAGTGGGTGGGCAATATAC   | 300 |
| N1 245626 Method K | 241 | ACTTCGGTAACATTAGCGGGCAATTCATCTCTTTGCCCTATTAGTGGGTGGGCAATATAC   | 300 |
| N1 245626 Method N | 241 | ACTTCGGTAACATTAGCGGGCAATTCATCTCTTTGCCCTATTAGTGGGTGGGCAATATAC   | 300 |

|                    |     |                                                 |     |
|--------------------|-----|-------------------------------------------------|-----|
| N1 245625 MiSeq    | 301 | AGTAAGGACAACGGTATAAGAATTGGGTCCAAGGGGGATGTGTTTGT | 360 |
| N1 245626 Method A | 301 | AGTAAGGACAACGGTATAAGAATTGGGTCCAAGGGGGATGTGTTTGT | 360 |
| N1 245626 Method S | 301 | AGTAAGGACAACGGTATAAGAATTGGGTCCAAGGGGGATGTGTTTGT | 360 |
| N1 245626 Method K | 301 | AGTAAGGACAACGGTATAAGAATTGGGTCCAAGGGGGATGTGTTTGT | 360 |
| N1 245626 Method N | 301 | AGTAAGGACAACGGTATAAGAATTGGGTCCAAGGGGGATGTGTTTGT | 360 |

|                    |     |                                                             |     |
|--------------------|-----|-------------------------------------------------------------|-----|
| N1 245625 MiSeq    | 361 | TTCATCTCATGCTCCCACTTGGAATGCAGAACCTTTTTCTGACCCAGGGAGCTCTGCTG | 420 |
| N1 245626 Method A | 361 | TTCATCTCATGCTCCCACTTGGAATGCAGAACCTTTTTCTGACCCAGGGAGCTCTGCTG | 420 |
| N1 245626 Method S | 361 | TTCATCTCATGCTCCCACTTGGAATGCAGAACCTTTTTCTGACCCAGGGAGCTCTGCTG | 420 |
| N1 245626 Method K | 361 | TTCATCTCATGCTCCCACTTGGAATGCAGAACCTTTTTCTGACCCAGGGAGCTCTGCTG | 420 |
| N1 245626 Method N | 361 | TTCATCTCATGCTCCCACTTGGAATGCAGAACCTTTTTCTGACCCAGGGAGCTCTGCTG | 420 |

|                    |     |                                                              |     |
|--------------------|-----|--------------------------------------------------------------|-----|
| N1 245625 MiSeq    | 421 | AATGACAAACATTCTAATGGGACCGTTAAGGATAGAAGCCCTTATAGAACTTTGATGAGT | 480 |
| N1 245626 Method A | 421 | AATGACAAACATTCTAATGGGACCGTTAAGGATAGAAGCCCTTATAGAACTTTGATGAGT | 480 |
| N1 245626 Method S | 421 | AATGACAAACATTCTAATGGGACCGTTAAGGATAGAAGCCCTTATAGAACTTTGATGAGT | 480 |
| N1 245626 Method K | 421 | AATGACAAACATTCTAATGGGACCGTTAAGGATAGAAGCCCTTATAGAACTTTGATGAGT | 480 |
| N1 245626 Method N | 421 | AATGACAAACATTCTAATGGGACCGTTAAGGATAGAAGCCCTTATAGAACTTTGATGAGT | 480 |

|                    |     |                                                               |     |
|--------------------|-----|---------------------------------------------------------------|-----|
| N1 245625 MiSeq    | 481 | TGTCCCGTGGGTGAGGCTCCTTCCCCGTACAATTCAAGATTTGAGTCTGTTGCTTGGTCTG | 540 |
| N1 245626 Method A | 481 | TGTCCCGTGGGTGAGGCTCCTTCCCCGTACAATTCAAGATTTGAGTCTGTTGCTTGGTCTG | 540 |
| N1 245626 Method S | 481 | TGTCCCGTGGGTGAGGCTCCTTCCCCGTACAATTCAAGATTTGAGTCTGTTGCTTGGTCTG | 540 |
| N1 245626 Method K | 481 | TGTCCCGTGGGTGAGGCTCCTTCCCCGTACAATTCAAGATTTGAGTCTGTTGCTTGGTCTG | 540 |
| N1 245626 Method N | 481 | TGTCCCGTGGGTGAGGCTCCTTCCCCGTACAATTCAAGATTTGAGTCTGTTGCTTGGTCTG | 540 |

|                    |     |                                                              |     |
|--------------------|-----|--------------------------------------------------------------|-----|
| N1 245625 MiSeq    | 541 | GCAAGTGCTTGTCATGATGGCATCAGTTGGTTGACAATCGGTATTTCTGGTCCAGACAAT | 600 |
| N1 245626 Method A | 541 | GCAAGTGCTTGTCATGATGGCATCAGTTGGTTGACAATCGGTATTTCTGGTCCAGACAAT | 600 |
| N1 245626 Method S | 541 | GCAAGTGCTTGTCATGATGGCATCAGTTGGTTGACAATCGGTATTTCTGGTCCAGACAAT | 600 |
| N1 245626 Method K | 541 | GCAAGTGCTTGTCATGATGGCATCAGTTGGTTGACAATCGGTATTTCTGGTCCAGACAAT | 600 |
| N1 245626 Method N | 541 | GCAAGTGCTTGTCATGATGGCATCAGTTGGTTGACAATCGGTATTTCTGGTCCAGACAAT | 600 |

|                    |     |                                                              |     |
|--------------------|-----|--------------------------------------------------------------|-----|
| N1 245625 MiSeq    | 601 | GGAGCTGTGGCTGTATTGAAGTACAATGGCATAATAACGGATACTATCAAGAGTTGGAGA | 660 |
| N1 245626 Method A | 601 | GGAGCTGTGGCTGTATTGAAGTACAATGGCATAATAACGGATACTATCAAGAGTTGGAGA | 660 |
| N1 245626 Method S | 601 | GGAGCTGTGGCTGTATTGAAGTACAATGGCATAATAACGGATACTATCAAGAGTTGGAGA | 660 |
| N1 245626 Method K | 601 | GGAGCTGTGGCTGTATTGAAGTACAATGGCATAATAACGGATACTATCAAGAGTTGGAGA | 660 |
| N1 245626 Method N | 601 | GGAGCTGTGGCTGTATTGAAGTACAATGGCATAATAACGGATACTATCAAGAGTTGGAGA | 660 |

|                    |     |                                                              |     |
|--------------------|-----|--------------------------------------------------------------|-----|
| N1 245625 MiSeq    | 661 | AACAACATTTTGAGAACTCAAGAATCTGAATGTGCGTGCGTAAATGGCTCTTGCTTCACC | 720 |
| N1 245626 Method A | 661 | AACAACATTTTGAGAACTCAAGAATCTGAATGTGCGTGCGTAAATGGCTCTTGCTTCACC | 720 |
| N1 245626 Method S | 661 | AACAACATTTTGAGAACTCAAGAATCTGAATGTGCGTGCGTAAATGGCTCTTGCTTCACC | 720 |
| N1 245626 Method K | 661 | AACAACATTTTGAGAACTCAAGAATCTGAATGTGCGTGCGTAAATGGCTCTTGCTTCACC | 720 |
| N1 245626 Method N | 661 | AACAACATTTTGAGAACTCAAGAATCTGAATGTGCGTGCGTAAATGGCTCTTGCTTCACC | 720 |

|                    |     |                                                              |     |
|--------------------|-----|--------------------------------------------------------------|-----|
| N1 245625 MiSeq    | 721 | GTAATGACTGATGGACCAAGCAATGGGCAGGCCTCATATAAAATCTTCAAGATAGAGAAA | 780 |
| N1 245626 Method A | 721 | GTAATGACTGATGGACCAAGCAATGGGCAGGCCTCATATAAAATCTTCAAGATAGAGAAA | 780 |
| N1 245626 Method S | 721 | GTAATGACTGATGGACCAAGCAATGGGCAGGCCTCATATAAAATCTTCAAGATAGAGAAA | 780 |
| N1 245626 Method K | 721 | GTAATGACTGATGGACCAAGCAATGGGCAGGCCTCATATAAAATCTTCAAGATAGAGAAA | 780 |
| N1 245626 Method N | 721 | GTAATGACTGATGGACCAAGCAATGGGCAGGCCTCATATAAAATCTTCAAGATAGAGAAA | 780 |

|                    |     |                                                              |     |
|--------------------|-----|--------------------------------------------------------------|-----|
| N1 245625 MiSeq    | 781 | GGGAAAGTTGTCAAATCAGTTGAATTGAATGCCCCTAATTACCACTACGAGGAATGCTCC | 840 |
| N1 245626 Method A | 781 | GGGAAAGTTGTCAAATCAGTTGAATTGAATGCCCCTAATTACCACTACGAGGAATGCTCC | 840 |
| N1 245626 Method S | 781 | GGGAAAGTTGTCAAATCAGTTGAATTGAATGCCCCTAATTACCACTACGAGGAATGCTCC | 840 |
| N1 245626 Method K | 781 | GGGAAAGTTGTCAAATCAGTTGAATTGAATGCCCCTAATTACCACTACGAGGAATGCTCC | 840 |
| N1 245626 Method N | 781 | GGGAAAGTTGTCAAATCAGTTGAATTGAATGCCCCTAATTACCACTACGAGGAATGCTCC | 840 |

|                    |     |                                                              |     |
|--------------------|-----|--------------------------------------------------------------|-----|
| N1 245625 MiSeq    | 841 | TGTTATCCTGATGCGGGTGATATTATGTGTGTGTGCAGGGACAATTGGCATGGCTCAAAC | 900 |
| N1 245626 Method A | 841 | TGTTATCCTGATGCGGGTGATATTATGTGTGTGTGCAGGGACAATTGGCATGGCTCAAAC | 900 |
| N1 245626 Method S | 841 | TGTTATCCTGATGCGGGTGATATTATGTGTGTGTGCAGGGACAATTGGCATGGCTCAAAC | 900 |
| N1 245626 Method K | 841 | TGTTATCCTGATGCGGGTGATATTATGTGTGTGTGCAGGGACAATTGGCATGGCTCAAAC | 900 |
| N1 245626 Method N | 841 | TGTTATCCTGATGCGGGTGATATTATGTGTGTGTGCAGGGACAATTGGCATGGCTCAAAC | 900 |

|                    |      |                                                               |      |
|--------------------|------|---------------------------------------------------------------|------|
| N1 245625 MiSeq    | 901  | CGGCCGTGGGTATCTTTTAATCAAAATCTGGAGTATCAAATAGGATATATATGCAGTGGG  | 960  |
| N1 245626 Method A | 901  | CGGCCGTGGGTATCTTTTAATCAAAATCTGGAGTATCAAATAGGATATATATGCAGTGGG  | 960  |
| N1 245626 Method S | 901  | CGGCCGTGGGTATCTTTTAATCAAAATCTGGAGTATCAAATAGGATATATATGCAGTGGG  | 960  |
| N1 245626 Method K | 901  | CGGCCGTGGGTATCTTTTAATCAAAATCTGGAGTATCAAATAGGATATATATGCAGTGGG  | 960  |
| N1 245626 Method N | 901  | CGGCCGTGGGTATCTTTTAATCAAAATCTGGAGTATCAAATAGGATATATATGCAGTGGG  | 960  |
|                    |      |                                                               |      |
| N1 245625 MiSeq    | 961  | GTTTTCGGGGACAATCCCCGCCCAATGATGGAACAGGCAGTTGCAGTCCAATGTCCTCT   | 1020 |
| N1 245626 Method A | 961  | GTTTTCGGGGACAATCCCCGCCCAATGATGGAACAGGCAGTTGCAGTCCAATGTCCTCT   | 1020 |
| N1 245626 Method S | 961  | GTTTTCGGGGACAATCCCCGCCCAATGATGGAACAGGCAGTTGCAGTCCAATGTCCTCT   | 1020 |
| N1 245626 Method K | 961  | GTTTTCGGGGACAATCCCCGCCCAATGATGGAACAGGCAGTTGCAGTCCAATGTCCTCT   | 1020 |
| N1 245626 Method N | 961  | GTTTTCGGGGACAATCCCCGCCCAATGATGGAACAGGCAGTTGCAGTCCAATGTCCTCT   | 1020 |
|                    |      |                                                               |      |
| N1 245625 MiSeq    | 1021 | AATGGGGCATATGGGGTAAAAGGGTTTTTCATTTAAGTACGGTAATGGGGTTTGGATCGGA | 1080 |
| N1 245626 Method A | 1021 | AATGGGGCATATGGGGTAAAAGGGTTTTTCATTTAAGTACGGTAATGGGGTTTGGATCGGA | 1080 |
| N1 245626 Method S | 1021 | AATGGGGCATATGGGGTAAAAGGGTTTTTCATTTAAGTACGGTAATGGGGTTTGGATCGGA | 1080 |
| N1 245626 Method K | 1021 | AATGGGGCATATGGGGTAAAAGGGTTTTTCATTTAAGTACGGTAATGGGGTTTGGATCGGA | 1080 |
| N1 245626 Method N | 1021 | AATGGGGCATATGGGGTAAAAGGGTTTTTCATTTAAGTACGGTAATGGGGTTTGGATCGGA | 1080 |
|                    |      |                                                               |      |
| N1 245625 MiSeq    | 1081 | AGAACAAAAAGCACTAGTTCCAGAAGCGGCTTTGAGATGATTTGGGATCCGAATGGGTGG  | 1140 |
| N1 245626 Method A | 1081 | AGAACAAAAAGCACTAGTTCCAGAAGCGGCTTTGAGATGATTTGGGATCCGAATGGGTGG  | 1140 |
| N1 245626 Method S | 1081 | AGAACAAAAAGCACTAGTTCCAGAAGCGGCTTTGAGATGATTTGGGATCCGAATGGGTGG  | 1140 |
| N1 245626 Method K | 1081 | AGAACAAAAAGCACTAGTTCCAGAAGCGGCTTTGAGATGATTTGGGATCCGAATGGGTGG  | 1140 |
| N1 245626 Method N | 1081 | AGAACAAAAAGCACTAGTTCCAGAAGCGGCTTTGAGATGATTTGGGATCCGAATGGGTGG  | 1140 |
|                    |      |                                                               |      |
| N1 245625 MiSeq    | 1141 | ACTGAGACGGACAGTAGTTTCTCAGTGAAGCAAGACATTGTAGAAATAACTGACTGGTCA  | 1200 |
| N1 245626 Method A | 1141 | ACTGAGACGGACAGTAGTTTCTCAGTGAAGCAAGACATTGTAGAAATAACTGACTGGTCA  | 1200 |
| N1 245626 Method S | 1141 | ACTGAGACGGACAGTAGTTTCTCAGTGAAGCAAGACATTGTAGAAATAACTGACTGGTCA  | 1200 |
| N1 245626 Method K | 1141 | ACTGAGACGGACAGTAGTTTCTCAGTGAAGCAAGACATTGTAGAAATAACTGACTGGTCA  | 1200 |
| N1 245626 Method N | 1141 | ACTGAGACGGACAGTAGTTTCTCAGTGAAGCAAGACATTGTAGAAATAACTGACTGGTCA  | 1200 |

|                           |      |                                                             |      |
|---------------------------|------|-------------------------------------------------------------|------|
| <b>N1 245625 MiSeq</b>    | 1201 | GGATATAGTGGGAGTTTTGTCCAGCATCCAGAAGTACAGGATTAGATTGCATGAGGCCT | 1260 |
| <b>N1 245626 Method A</b> | 1201 | GGATATAGTGGGAGTTTTGTCCAGCATCCAGAAGTACAGGATTAGATTGCATGAGGCCT | 1260 |
| <b>N1 245626 Method S</b> | 1201 | GGATATAGTGGGAGTTTTGTCCAGCATCCAGAAGTACAGGATTAGATTGCATGAGGCCT | 1260 |
| <b>N1 245626 Method K</b> | 1201 | GGATATAGTGGGAGTTTTGTCCAGCATCCAGAAGTACAGGATTAGATTGCATGAGGCCT | 1260 |
| <b>N1 245626 Method N</b> | 1201 | GGATATAGTGGGAGTTTTGTCCAGCATCCAGAAGTACAGGATTAGATTGCATGAGGCCT | 1260 |

|                           |      |                                                              |      |
|---------------------------|------|--------------------------------------------------------------|------|
| <b>N1 245625 MiSeq</b>    | 1261 | TGTTTCTGGGTTGAGCTAATTAGAGGGAGGCCCAAAGAGAACACAATTTGGACTAGCGGG | 1320 |
| <b>N1 245626 Method A</b> | 1261 | TGTTTCTGGGTTGAGCTAATTAGAGGGAGGCCCAAAGAGAACACAATTTGGACTAGCGGG | 1320 |
| <b>N1 245626 Method S</b> | 1261 | TGTTTCTGGGTTGAGCTAATTAGAGGGAGGCCCAAAGAGAACACAATTTGGACTAGCGGG | 1320 |
| <b>N1 245626 Method K</b> | 1261 | TGTTTCTGGGTTGAGCTAATTAGAGGGAGGCCCAAAGAGAACACAATTTGGACTAGCGGG | 1320 |
| <b>N1 245626 Method N</b> | 1261 | TGTTTCTGGGTTGAGCTAATTAGAGGGAGGCCCAAAGAGAACACAATTTGGACTAGCGGG | 1320 |

|                           |      |                                                              |      |
|---------------------------|------|--------------------------------------------------------------|------|
| <b>N1 245625 MiSeq</b>    | 1321 | AGCAGCATATCCTTTTGTGGTGTAATAAGTGACACTGTGGGTTGGTCTTGGCCAGACGGT | 1380 |
| <b>N1 245626 Method A</b> | 1321 | AGCAGCATATCCTTTTGTGGTGTAATAAGTGACACTGTGGGTTGGTCTTGGCCAGACGGT | 1380 |
| <b>N1 245626 Method S</b> | 1321 | AGCAGCATATCCTTTTGTGGTGTAATAAGTGACACTGTGGGTTGGTCTTGGCCAGACGGT | 1380 |
| <b>N1 245626 Method K</b> | 1321 | AGCAGCATATCCTTTTGTGGTGTAATAAGTGACACTGTGGGTTGGTCTTGGCCAGACGGT | 1380 |
| <b>N1 245626 Method N</b> | 1321 | AGCAGCATATCCTTTTGTGGTGTAATAAGTGACACTGTGGGTTGGTCTTGGCCAGACGGT | 1380 |

|                           |      |                                |      |
|---------------------------|------|--------------------------------|------|
| <b>N1 245625 MiSeq</b>    | 1381 | GCTGAGTTGCCATTCAACATTGACAAGTAG | 1410 |
| <b>N1 245626 Method A</b> | 1381 | GCTGAGTTGCCATTCAACATTGACAAGTAG | 1410 |
| <b>N1 245626 Method S</b> | 1381 | GCTGAGTTGCCATTCAACATTGACAAGTAG | 1410 |
| <b>N1 245626 Method K</b> | 1381 | GCTGAGTTGCCATTCAACATTGACAAGTAG | 1410 |
| <b>N1 245626 Method N</b> | 1381 | GCTGAGTTGCCATTCAACATTGACAAGTAG | 1410 |
