# Supplementary material for: An Evaluation of Avian Influenza Virus Whole Genome Sequencing Approaches Using Nanopore Technology
Source: Preprints.org preprint supplement (doi:10.20944/preprints202301.0480.v1), 2023-01-26
Supplement: Supplementary file 23 [file supplementary]

## Formatted Alignments

|                            |     |                                                              |     |
|----------------------------|-----|--------------------------------------------------------------|-----|
| <b>PB1 246038 MiSeq</b>    | 1   | ATGGATGTCAATCCGACTTTACTTTTCTTAAAAGTGCCAGCGCAAAATGCCATAAGTACC | 60  |
| <b>PB1 246038 Method A</b> | 1   | ATGGATGTCAATCCGACTTTACTTTTCTTAAAAGTGCCAGCGCAAAATGCCATAAGTACC | 60  |
| <b>PB1 246038 Method S</b> | 1   | ATGGATGTCAATCCGACTTTACTTTTCTTAAAAGTGCCAGCGCAAAATGCCATAAGTACC | 60  |
| <b>PB1 246038 Method E</b> | 1   | ATGGATGTCAATCCGACTTTACTTTTCTTAAAAGTGCCAGCGCAAAATGCCATAAGTACC | 60  |
| <b>PB1 246038 Method K</b> | 1   | ATGGATGTCAATCCGACTTTACTTTTCTTAAAAGTGCCAGCGCAAAATGCCATAAGTACC | 60  |
| <b>PB1 246038 Method N</b> | 1   | ATGGATGTCAATCCGACTTTACTTTTCTTAAAAGTGCCAGCGCAAAATGCCATAAGTACC | 60  |
|                            |     |                                                              |     |
| <b>PB1 246038 MiSeq</b>    | 61  | ACATTCCCTTATACTGGAGATCCTCCATACAGCCATGGAACAGGGACAGGATACACAATG | 120 |
| <b>PB1 246038 Method A</b> | 61  | ACATTCCCTTATACTGGAGATCCTCCATACAGCCATGGAACAGGGACAGGATACACAATG | 120 |
| <b>PB1 246038 Method S</b> | 61  | ACATTCCCTTATACTGGAGATCCTCCATACAGCCATGGAACAGGGACAGGATACACAATG | 120 |
| <b>PB1 246038 Method E</b> | 61  | ACATTCCCTTATACTGGAGATCCTCCATACAGCCATGGAACAGGGACAGGATACACAATG | 120 |
| <b>PB1 246038 Method K</b> | 61  | ACATTCCCTTATACTGGAGATCCTCCATACAGCCATGGAACAGGGACAGGATACACAATG | 120 |
| <b>PB1 246038 Method N</b> | 61  | ACATTCCCTTATACTGGAGATCCTCCATACAGCCATGGAACAGGGACAGGATACACAATG | 120 |
|                            |     |                                                              |     |
| <b>PB1 246038 MiSeq</b>    | 121 | GACACAGTCAACAGAACACATCAATACTCAGAGAAGGGAAAATGGACAACAAACACAGAA | 180 |
| <b>PB1 246038 Method A</b> | 121 | GACACAGTCAACAGAACACATCAATACTCAGAGAAGGGAAAATGGACAACAAACACAGAA | 180 |
| <b>PB1 246038 Method S</b> | 121 | GACACAGTCAACAGAACACATCAATACTCAGAGAAGGGAAAATGGACAACAAACACAGAA | 180 |
| <b>PB1 246038 Method E</b> | 121 | GACACAGTCAACAGAACACATCAATACTCAGAGAAGGGAAAATGGACAACAAACACAGAA | 180 |
| <b>PB1 246038 Method K</b> | 121 | GACACAGTCAACAGAACACATCAATACTCAGAGAAGGGAAAATGGACAACAAACACAGAA | 180 |
| <b>PB1 246038 Method N</b> | 121 | GACACAGTCAACAGAACACATCAATACTCAGAGAAGGGAAAATGGACAACAAACACAGAA | 180 |
|                            |     |                                                              |     |
| <b>PB1 246038 MiSeq</b>    | 181 | ACCGGAGCACCTCAACTCAACCCAATTGATGGACCACTACCTGGGGACAACGAACCGAGC | 240 |
| <b>PB1 246038 Method A</b> | 181 | ACCGGAGCACCTCAACTCAACCCAATTGATGGACCACTACCTGGGGACAACGAACCGAGC | 240 |
| <b>PB1 246038 Method S</b> | 181 | ACCGGAGCACCTCAACTCAACCCAATTGATGGACCACTACCTGGGGACAACGAACCGAGC | 240 |
| <b>PB1 246038 Method E</b> | 181 | ACCGGAGCACCTCAACTCAACCCAATTGATGGACCACTACCTGGGGACAACGAACCGAGC | 240 |
| <b>PB1 246038 Method K</b> | 181 | ACCGGAGCACCTCAACTCAACCCAATTGATGGACCACTACCTGGGGACAACGAACCGAGC | 240 |
| <b>PB1 246038 Method N</b> | 181 | ACCGGAGCACCTCAACTCAACCCAATTGATGGACCACTACCTGGGGACAACGAACCGAGC | 240 |

|                     |     |                                                              |     |
|---------------------|-----|--------------------------------------------------------------|-----|
| PB1 246038 MiSeq    | 241 | GGATATGCACAAACAGATTGCGTGTTGGAAGCAATGGCTTTCCTTGAAGAGTCCCACCCA | 300 |
| PB1 246038 Method A | 241 | GGATATGCACAAACAGATTGCGTGTTGGAAGCAATGGCTTTCCTTGAAGAGTCCCACCCA | 300 |
| PB1 246038 Method S | 241 | GGATATGCACAAACAGATTGCGTGTTGGAAGCAATGGCTTTCCTTGAAGAGTCCCACCCA | 300 |
| PB1 246038 Method E | 241 | GGATATGCACAAACAGATTGCGTGTTGGAAGCAATGGCTTTCCTTGAAGAGTCCCACCCA | 300 |
| PB1 246038 Method K | 241 | GGATATGCACAAACAGATTGCGTGTTGGAAGCAATGGCTTTCCTTGAAGAGTCCCACCCA | 300 |
| PB1 246038 Method N | 241 | GGATATGCACAAACAGATTGCGTGTTGGAAGCAATGGCTTTCCTTGAAGAGTCCCACCCA | 300 |

|                     |     |                                                               |     |
|---------------------|-----|---------------------------------------------------------------|-----|
| PB1 246038 MiSeq    | 301 | GGGATCTTTGGAAACTCTTGTCTTGAAACGATGGAAGTCGTTTCAGCAAACAAGAGTGGAC | 360 |
| PB1 246038 Method A | 301 | GGGATCTTTGGAAACTCTTGTCTTGAAACGATGGAAGTCGTTTCAGCAAACAAGAGTGGAC | 360 |
| PB1 246038 Method S | 301 | GGGATCTTTGGAAACTCTTGTCTTGAAACGATGGAAGTCGTTTCAGCAAACAAGAGTGGAC | 360 |
| PB1 246038 Method E | 301 | GGGATCTTTGGAAACTCTTGTCTTGAAACGATGGAAGTCGTTTCAGCAAACAAGAGTGGAC | 360 |
| PB1 246038 Method K | 301 | GGGATCTTTGGAAACTCTTGTCTTGAAACGATGGAAGTCGTTTCAGCAAACAAGAGTGGAC | 360 |
| PB1 246038 Method N | 301 | GGGATCTTTGGAAACTCTTGTCTTGAAACGATGGAAGTCGTTTCAGCAAACAAGAGTGGAC | 360 |

|                     |     |                                                               |     |
|---------------------|-----|---------------------------------------------------------------|-----|
| PB1 246038 MiSeq    | 361 | AAACTAACTCAAGGTCGCCAGACTTATGACTGGGACACTGAATAGAAACCAACCAGCTGCA | 420 |
| PB1 246038 Method A | 361 | AAACTAACTCAAGGTCGCCAGACTTATGACTGGGACACTGAATAGAAACCAACCAGCTGCA | 420 |
| PB1 246038 Method S | 361 | AAACTAACTCAAGGTCGCCAGACTTATGACTGGGACACTGAATAGAAACCAACCAGCTGCA | 420 |
| PB1 246038 Method E | 361 | AAACTAACTCAAGGTCGCCAGACTTATGACTGGGACACTGAATAGAAACCAACCAGCTGCA | 420 |
| PB1 246038 Method K | 361 | AAACTAACTCAAGGTCGCCAGACTTATGACTGGGACACTGAATAGAAACCAACCAGCTGCA | 420 |
| PB1 246038 Method N | 361 | AAACTAACTCAAGGTCGCCAGACTTATGACTGGGACACTGAATAGAAACCAACCAGCTGCA | 420 |

|                     |     |                                                              |     |
|---------------------|-----|--------------------------------------------------------------|-----|
| PB1 246038 MiSeq    | 421 | ACTGCCCTGGCCAACACTATAGAGGTCTTCAGATCAAACGGTCTAACAGCCAATGAATCG | 480 |
| PB1 246038 Method A | 421 | ACTGCCCTGGCCAACACTATAGAGGTCTTCAGATCAAACGGTCTAACAGCCAATGAATCG | 480 |
| PB1 246038 Method S | 421 | ACTGCCCTGGCCAACACTATAGAGGTCTTCAGATCAAACGGTCTAACAGCCAATGAATCG | 480 |
| PB1 246038 Method E | 421 | ACTGCCCTGGCCAACACTATAGAGGTCTTCAGATCAAACGGTCTAACAGCCAATGAATCG | 480 |
| PB1 246038 Method K | 421 | ACTGCCCTGGCCAACACTATAGAGGTCTTCAGATCAAACGGTCTAACAGCCAATGAATCG | 480 |
| PB1 246038 Method N | 421 | ACTGCCCTGGCCAACACTATAGAGGTCTTCAGATCAAACGGTCTAACAGCCAATGAATCG | 480 |

|                     |     |                                                               |     |
|---------------------|-----|---------------------------------------------------------------|-----|
| PB1 246038 MiSeq    | 481 | GGGAGACTAATAGATTTTCCTCAAGGACGTGATGGACTCAATGGATACAGAAGAAATGGAA | 540 |
| PB1 246038 Method A | 481 | GGGAGACTAATAGATTTTCCTCAAGGACGTGATGGACTCAATGGATACAGAAGAAATGGAA | 540 |
| PB1 246038 Method S | 481 | GGGAGACTAATAGATTTTCCTCAAGGACGTGATGGACTCAATGGATACAGAAGAAATGGAA | 540 |
| PB1 246038 Method E | 481 | GGGAGACTAATAGATTTTCCTCAAGGACGTGATGGACTCAATGGATACAGAAGAAATGGAA | 540 |
| PB1 246038 Method K | 481 | GGGAGACTAATAGATTTTCCTCAAGGACGTGATGGACTCAATGGATACAGAAGAAATGGAA | 540 |
| PB1 246038 Method N | 481 | GGGAGACTAATAGATTTTCCTCAAGGACGTGATGGACTCAATGGATACAGAAGAAATGGAA | 540 |

|                     |     |                                                              |     |
|---------------------|-----|--------------------------------------------------------------|-----|
| PB1 246038 MiSeq    | 541 | ATAACAACACATTTCCAGAGAAAGAGAAGAGTAAGGGACAACATGACCAAGAAAATGGTC | 600 |
| PB1 246038 Method A | 541 | ATAACAACACATTTCCAGAGAAAGAGAAGAGTAAGGGACAACATGACCAAGAAAATGGTC | 600 |
| PB1 246038 Method S | 541 | ATAACAACACATTTCCAGAGAAAGAGAAGAGTAAGGGACAACATGACCAAGAAAATGGTC | 600 |
| PB1 246038 Method E | 541 | ATAACAACACATTTCCAGAGAAAGAGAAGAGTAAGGGACAACATGACCAAGAAAATGGTC | 600 |
| PB1 246038 Method K | 541 | ATAACAACACATTTCCAGAGAAAGAGAAGAGTAAGGGACAACATGACCAAGAAAATGGTC | 600 |
| PB1 246038 Method N | 541 | ATAACAACACATTTCCAGAGAAAGAGAAGAGTAAGGGACAACATGACCAAGAAAATGGTC | 600 |

|                     |     |                                                              |     |
|---------------------|-----|--------------------------------------------------------------|-----|
| PB1 246038 MiSeq    | 601 | ACACAAAGAACAATAGGAAAGAAGAAACAAAGGCTAAACAAGAGGAGCTACTTAATAAGA | 660 |
| PB1 246038 Method A | 601 | ACACAAAGAACAATAGGAAAGAAGAAACAAAGGCTAAACAAGAGGAGCTACTTAATAAGA | 660 |
| PB1 246038 Method S | 601 | ACACAAAGAACAATAGGAAAGAAGAAACAAAGGCTAAACAAGAGGAGCTACTTAATAAGA | 660 |
| PB1 246038 Method E | 601 | ACACAAAGAACAATAGGAAAGAAGAAACAAAGGCTAAACAAGAGGAGCTACTTAATAAGA | 660 |
| PB1 246038 Method K | 601 | ACACAAAGAACAATAGGAAAGAAGAAACAAAGGCTAAACAAGAGGAGCTACTTAATAAGA | 660 |
| PB1 246038 Method N | 601 | ACACAAAGAACAATAGGAAAGAAGAAACAAAGGCTAAACAAGAGGAGCTACTTAATAAGA | 660 |

|                     |     |                                                              |     |
|---------------------|-----|--------------------------------------------------------------|-----|
| PB1 246038 MiSeq    | 661 | GCACTGACACTGAATACAATGACAAAAGATGCAGAAAGAGGCAAATTGAAGAGACGGGCG | 720 |
| PB1 246038 Method A | 661 | GCACTGACACTGAATACAATGACAAAAGATGCAGAAAGAGGCAAATTGAAGAGACGGGCG | 720 |
| PB1 246038 Method S | 661 | GCACTGACACTGAATACAATGACAAAAGATGCAGAAAGAGGCAAATTGAAGAGACGGGCG | 720 |
| PB1 246038 Method E | 661 | GCACTGACACTGAATACAATGACAAAAGATGCAGAAAGAGGCAAATTGAAGAGACGGGCG | 720 |
| PB1 246038 Method K | 661 | GCACTGACACTGAATACAATGACAAAAGATGCAGAAAGAGGCAAATTGAAGAGACGGGCG | 720 |
| PB1 246038 Method N | 661 | GCACTGACACTGAATACAATGACAAAAGATGCAGAAAGAGGCAAATTGAAGAGACGGGCG | 720 |

|                     |     |                                                               |     |
|---------------------|-----|---------------------------------------------------------------|-----|
| PB1 246038 MiSeq    | 721 | ATTGCAACACCAGGGATGCAGATTAGAGGATTTGTGTACTTTGTCTGAAACACTGGCAAGG | 780 |
| PB1 246038 Method A | 721 | ATTGCAACACCAGGGATGCAGATTAGAGGATTTGTGTACTTTGTCTGAAACACTGGCAAGG | 780 |
| PB1 246038 Method S | 721 | ATTGCAACACCAGGGATGCAGATTAGAGGATTTGTGTACTTTGTCTGAAACACTGGCAAGG | 780 |
| PB1 246038 Method E | 721 | ATTGCAACACCAGGGATGCAGATTAGAGGATTTGTGTACTTTGTCTGAAACACTGGCAAGG | 780 |
| PB1 246038 Method K | 721 | ATTGCAACACCAGGGATGCAGATTAGAGGATTTGTGTACTTTGTCTGAAACACTGGCAAGG | 780 |
| PB1 246038 Method N | 721 | ATTGCAACACCAGGGATGCAGATTAGAGGATTTGTGTACTTTGTCTGAAACACTGGCAAGG | 780 |

|                     |     |                                                                |     |
|---------------------|-----|----------------------------------------------------------------|-----|
| PB1 246038 MiSeq    | 781 | AGCATCTGTGAAAAAAGCTTGAGCAATCTGGACTCCCCGTTGGAGGAAATGAGAAGAAGGCT | 840 |
| PB1 246038 Method A | 781 | AGCATCTGTGAAAAAAGCTTGAGCAATCTGGACTCCCCGTTGGAGGAAATGAGAAGAAGGCT | 840 |
| PB1 246038 Method S | 781 | AGCATCTGTGAAAAAAGCTTGAGCAATCTGGACTCCCCGTTGGAGGAAATGAGAAGAAGGCT | 840 |
| PB1 246038 Method E | 781 | AGCATCTGTGAAAAAAGCTTGAGCAATCTGGACTCCCCGTTGGAGGAAATGAGAAGAAGGCT | 840 |
| PB1 246038 Method K | 781 | AGCATCTGTGAAAAAAGCTTGAGCAATCTGGACTCCCCGTTGGAGGAAATGAGAAGAAGGCT | 840 |
| PB1 246038 Method N | 781 | AGCATCTGTGAAAAAAGCTTGAGCAATCTGGACTCCCCGTTGGAGGAAATGAGAAGAAGGCT | 840 |

|                            |      |                                                                |      |
|----------------------------|------|----------------------------------------------------------------|------|
| <b>PB1 246038 MiSeq</b>    | 841  | AAATTGGCAAATGTCGTGAGGAAAAATGATGACTAACTCACAAAGATACAGAGCTCTCCTTC | 900  |
| <b>PB1 246038 Method A</b> | 841  | AAATTGGCAAATGTCGTGAGGAAAAATGATGACTAACTCACAAAGATACAGAGCTCTCCTTC | 900  |
| <b>PB1 246038 Method S</b> | 841  | AAATTGGCAAATGTCGTGAGGAAAAATGATGACTAACTCACAAAGATACAGAGCTCTCCTTC | 900  |
| <b>PB1 246038 Method E</b> | 841  | AAATTGGCAAATGTCGTGAGGAAAAATGATGACTAACTCACAAAGATACAGAGCTCTCCTTC | 900  |
| <b>PB1 246038 Method K</b> | 841  | AAATTGGCAAATGTCGTGAGGAAAAATGATGACTAACTCACAAAGATACAGAGCTCTCCTTC | 900  |
| <b>PB1 246038 Method N</b> | 841  | AAATTGGCAAATGTCGTGAGGAAAAATGATGACTAACTCACAAAGATACAGAGCTCTCCTTC | 900  |
|                            |      |                                                                |      |
| <b>PB1 246038 MiSeq</b>    | 901  | ACAATTACTGGAGATAACACAAAAATGGAATGAGAATCAAAATCCTCGGATGTTTCTGGCA  | 960  |
| <b>PB1 246038 Method A</b> | 901  | ACAATTACTGGAGATAACACAAAAATGGAATGAGAATCAAAATCCTCGGATGTTTCTGGCA  | 960  |
| <b>PB1 246038 Method S</b> | 901  | ACAATTACTGGAGATAACACAAAAATGGAATGAGAATCAAAATCCTCGGATGTTTCTGGCA  | 960  |
| <b>PB1 246038 Method E</b> | 901  | ACAATTACTGGAGATAACACAAAAATGGAATGAGAATCAAAATCCTCGGATGTTTCTGGCA  | 960  |
| <b>PB1 246038 Method K</b> | 901  | ACAATTACTGGAGATAACACAAAAATGGAATGAGAATCAAAATCCTCGGATGTTTCTGGCA  | 960  |
| <b>PB1 246038 Method N</b> | 901  | ACAATTACTGGAGATAACACAAAAATGGAATGAGAATCAAAATCCTCGGATGTTTCTGGCA  | 960  |
|                            |      |                                                                |      |
| <b>PB1 246038 MiSeq</b>    | 961  | ATGATAACGTACATTACAAGAAACCAACCTGAATGGTTTAGAAATGTCTTGAGTATTGCC   | 1020 |
| <b>PB1 246038 Method A</b> | 961  | ATGATAACGTACATTACAAGAAACCAACCTGAATGGTTTAGAAATGTCTTGAGTATTGCC   | 1020 |
| <b>PB1 246038 Method S</b> | 961  | ATGATAACGTACATTACAAGAAACCAACCTGAATGGTTTAGAAATGTCTTGAGTATTGCC   | 1020 |
| <b>PB1 246038 Method E</b> | 961  | ATGATAACGTACATTACAAGAAACCAACCTGAATGGTTTAGAAATGTCTTGAGTATTGCC   | 1020 |
| <b>PB1 246038 Method K</b> | 961  | ATGATAACGTACATTACAAGAAACCAACCTGAATGGTTTAGAAATGTCTTGAGTATTGCC   | 1020 |
| <b>PB1 246038 Method N</b> | 961  | ATGATAACGTACATTACAAGAAACCAACCTGAATGGTTTAGAAATGTCTTGAGTATTGCC   | 1020 |
|                            |      |                                                                |      |
| <b>PB1 246038 MiSeq</b>    | 1021 | CCTATAATGTTCTCGAACAAAAATGGCGAGATTGGGAAAAGGGTACATGTTTGAAAGTAAG  | 1080 |
| <b>PB1 246038 Method A</b> | 1021 | CCTATAATGTTCTCGAACAAAAATGGCGAGATTGGGAAAAGGGTACATGTTTGAAAGTAAG  | 1080 |
| <b>PB1 246038 Method S</b> | 1021 | CCTATAATGTTCTCGAACAAAAATGGCGAGATTGGGAAAAGGGTACATGTTTGAAAGTAAG  | 1080 |
| <b>PB1 246038 Method E</b> | 1021 | CCTATAATGTTCTCGAACAAAAATGGCGAGATTGGGAAAAGGGTACATGTTTGAAAGTAAG  | 1080 |
| <b>PB1 246038 Method K</b> | 1021 | CCTATAATGTTCTCGAACAAAAATGGCGAGATTGGGAAAAGGGTACATGTTTGAAAGTAAG  | 1080 |
| <b>PB1 246038 Method N</b> | 1021 | CCTATAATGTTCTCGAACAAAAATGGCGAGATTGGGAAAAGGGTACATGTTTGAAAGTAAG  | 1080 |
|                            |      |                                                                |      |
| <b>PB1 246038 MiSeq</b>    | 1081 | AGCATGAAGTTACGGACACAAATACCTGCAGAAATACTTGCAAAACATTGACTTAAAATAC  | 1140 |
| <b>PB1 246038 Method A</b> | 1081 | AGCATGAAGTTACGGACACAAATACCTGCAGAAATACTTGCAAAACATTGACTTAAAATAC  | 1140 |
| <b>PB1 246038 Method S</b> | 1081 | AGCATGAAGTTACGGACACAAATACCTGCAGAAATACTTGCAAAACATTGACTTAAAATAC  | 1140 |
| <b>PB1 246038 Method E</b> | 1081 | AGCATGAAGTTACGGACACAAATACCTGCAGAAATACTTGCAAAACATTGACTTAAAATAC  | 1140 |
| <b>PB1 246038 Method K</b> | 1081 | AGCATGAAGTTACGGACACAAATACCTGCAGAAATACTTGCAAAACATTGACTTAAAATAC  | 1140 |
| <b>PB1 246038 Method N</b> | 1081 | AGCATGAAGTTACGGACACAAATACCTGCAGAAATACTTGCAAAACATTGACTTAAAATAC  | 1140 |

|                     |      |                                                              |      |
|---------------------|------|--------------------------------------------------------------|------|
| PB1 246038 MiSeq    | 1141 | TTCAATGAATCAACAAGAAAGAAAATCGAAAAAATAAGGCCTCTACTAATAGATGGCACT | 1200 |
| PB1 246038 Method A | 1141 | TTCAATGAATCAACAAGAAAGAAAATCGAAAAAATAAGGCCTCTACTAATAGATGGCACT | 1200 |
| PB1 246038 Method S | 1141 | TTCAATGAATCAACAAGAAAGAAAATCGAAAAAATAAGGCCTCTACTAATAGATGGCACT | 1200 |
| PB1 246038 Method E | 1141 | TTCAATGAATCAACAAGAAAGAAAATCGAAAAAATAAGGCCTCTACTAATAGATGGCACT | 1200 |
| PB1 246038 Method K | 1141 | TTCAATGAATCAACAAGAAAGAAAATCGAAAAAATAAGGCCTCTACTAATAGATGGCACT | 1200 |
| PB1 246038 Method N | 1141 | TTCAATGAATCAACAAGAAAGAAAATCGAAAAAATAAGGCCTCTACTAATAGATGGCACT | 1200 |

|                     |      |                                                              |      |
|---------------------|------|--------------------------------------------------------------|------|
| PB1 246038 MiSeq    | 1201 | GCCTCATTGAGTCCTGGAATGATGATGGGCATGTTCAACATGCTGAGTACAGTATTAGGA | 1260 |
| PB1 246038 Method A | 1201 | GCCTCATTGAGTCCTGGAATGATGATGGGCATGTTCAACATGCTGAGTACAGTATTAGGA | 1260 |
| PB1 246038 Method S | 1201 | GCCTCATTGAGTCCTGGAATGATGATGGGCATGTTCAACATGCTGAGTACAGTATTAGGA | 1260 |
| PB1 246038 Method E | 1201 | GCCTCATTGAGTCCTGGAATGATGATGGGCATGTTCAACATGCTGAGTACAGTATTAGGA | 1260 |
| PB1 246038 Method K | 1201 | GCCTCATTGAGTCCTGGAATGATGATGGGCATGTTCAACATGCTGAGTACAGTATTAGGA | 1260 |
| PB1 246038 Method N | 1201 | GCCTCATTGAGTCCTGGAATGATGATGGGCATGTTCAACATGCTGAGTACAGTATTAGGA | 1260 |

|                     |      |                                                             |      |
|---------------------|------|-------------------------------------------------------------|------|
| PB1 246038 MiSeq    | 1261 | GTTTCAATCCTAAATCTTGGGCAAAAGAGGTACACCAAACCACATACTGGTGGGATGGA | 1320 |
| PB1 246038 Method A | 1261 | GTTTCAATCCTAAATCTTGGGCAAAAGAGGTACACCAAACCACATACTGGTGGGATGGA | 1320 |
| PB1 246038 Method S | 1261 | GTTTCAATCCTAAATCTTGGGCAAAAGAGGTACACCAAACCACATACTGGTGGGATGGA | 1320 |
| PB1 246038 Method E | 1261 | GTTTCAATCCTAAATCTTGGGCAAAAGAGGTACACCAAACCACATACTGGTGGGATGGA | 1320 |
| PB1 246038 Method K | 1261 | GTTTCAATCCTAAATCTTGGGCAAAAGAGGTACACCAAACCACATACTGGTGGGATGGA | 1320 |
| PB1 246038 Method N | 1261 | GTTTCAATCCTAAATCTTGGGCAAAAGAGGTACACCAAACCACATACTGGTGGGATGGA | 1320 |

|                     |      |                                                               |      |
|---------------------|------|---------------------------------------------------------------|------|
| PB1 246038 MiSeq    | 1321 | CTCCAATCCTCTGATGATTTTCGCCCTCATAGTAAATGCACCTAATCATGAGGGAATACAA | 1380 |
| PB1 246038 Method A | 1321 | CTCCAATCCTCTGATGATTTTCGCCCTCATAGTAAATGCACCTAATCATGAGGGAATACAA | 1380 |
| PB1 246038 Method S | 1321 | CTCCAATCCTCTGATGATTTTCGCCCTCATAGTAAATGCACCTAATCATGAGGGAATACAA | 1380 |
| PB1 246038 Method E | 1321 | CTCCAATCCTCTGATGATTTTCGCCCTCATAGTAAATGCACCTAATCATGAGGGAATACAA | 1380 |
| PB1 246038 Method K | 1321 | CTCCAATCCTCTGATGATTTTCGCCCTCATAGTAAATGCACCTAATCATGAGGGAATACAA | 1380 |
| PB1 246038 Method N | 1321 | CTCCAATCCTCTGATGATTTTCGCCCTCATAGTAAATGCACCTAATCATGAGGGAATACAA | 1380 |

|                     |      |                                                               |      |
|---------------------|------|---------------------------------------------------------------|------|
| PB1 246038 MiSeq    | 1381 | GCAGGAGTGGATAGGTTCTATAGGACCTGCAAACCTGGTCGGGATCAATATGAGCAAAAAG | 1440 |
| PB1 246038 Method A | 1381 | GCAGGAGTGGATAGGTTCTATAGGACCTGCAAACCTGGTCGGGATCAATATGAGCAAAAAG | 1440 |
| PB1 246038 Method S | 1381 | GCAGGAGTGGATAGGTTCTATAGGACCTGCAAACCTGGTCGGGATCAATATGAGCAAAAAG | 1440 |
| PB1 246038 Method E | 1381 | GCAGGAGTGGATAGGTTCTATAGGACCTGCAAACCTGGTCGGGATCAATATGAGCAAAAAG | 1440 |
| PB1 246038 Method K | 1381 | GCAGGAGTGGATAGGTTCTATAGGACCTGCAAACCTGGTCGGGATCAATATGAGCAAAAAG | 1440 |
| PB1 246038 Method N | 1381 | GCAGGAGTGGATAGGTTCTATAGGACCTGCAAACCTGGTCGGGATCAATATGAGCAAAAAG | 1440 |

|                            |      |                                                               |      |
|----------------------------|------|---------------------------------------------------------------|------|
| <b>PB1 246038 MiSeq</b>    | 1441 | AAGTCTTACATAAAACCGGACTGGAACATTTGAGTTTACAAGCTTTTTCTATCGCTATGGA | 1500 |
| <b>PB1 246038 Method A</b> | 1441 | AAGTCTTACATAAAACCGGACTGGAACATTTGAGTTTACAAGCTTTTTCTATCGCTATGGA | 1500 |
| <b>PB1 246038 Method S</b> | 1441 | AAGTCTTACATAAAACCGGACTGGAACATTTGAGTTTACAAGCTTTTTCTATCGCTATGGA | 1500 |
| <b>PB1 246038 Method E</b> | 1441 | AAGTCTTACATAAAACCGGACTGGAACATTTGAGTTTACAAGCTTTTTCTATCGCTATGGA | 1500 |
| <b>PB1 246038 Method K</b> | 1441 | AAGTCTTACATAAAACCGGACTGGAACATTTGAGTTTACAAGCTTTTTCTATCGCTATGGA | 1500 |
| <b>PB1 246038 Method N</b> | 1441 | AAGTCTTACATAAAACCGGACTGGAACATTTGAGTTTACAAGCTTTTTCTATCGCTATGGA | 1500 |

|                            |      |                                                              |      |
|----------------------------|------|--------------------------------------------------------------|------|
| <b>PB1 246038 MiSeq</b>    | 1501 | TTTGTGGCTAACTTCAGTATGGAGCTGCCCAGCTTTGGAGTTTCTGGGATCAATGAATCA | 1560 |
| <b>PB1 246038 Method A</b> | 1501 | TTTGTGGCTAACTTCAGTATGGAGCTGCCCAGCTTTGGAGTTTCTGGGATCAATGAATCA | 1560 |
| <b>PB1 246038 Method S</b> | 1501 | TTTGTGGCTAACTTCAGTATGGAGCTGCCCAGCTTTGGAGTTTCTGGGATCAATGAATCA | 1560 |
| <b>PB1 246038 Method E</b> | 1501 | TTTGTGGCTAACTTCAGTATGGAGCTGCCCAGCTTTGGAGTTTCTGGGATCAATGAATCA | 1560 |
| <b>PB1 246038 Method K</b> | 1501 | TTTGTGGCTAACTTCAGTATGGAGCTGCCCAGCTTTGGAGTTTCTGGGATCAATGAATCA | 1560 |
| <b>PB1 246038 Method N</b> | 1501 | TTTGTGGCTAACTTCAGTATGGAGCTGCCCAGCTTTGGAGTTTCTGGGATCAATGAATCA | 1560 |

|                            |      |                                                              |      |
|----------------------------|------|--------------------------------------------------------------|------|
| <b>PB1 246038 MiSeq</b>    | 1561 | GCTGACATGAGCATTGGCGTCACAGTGATAAAGAACAACATGATAAACAATGACCTTGGT | 1620 |
| <b>PB1 246038 Method A</b> | 1561 | GCTGACATGAGCATTGGCGTCACAGTGATAAAGAACAACATGATAAACAATGACCTTGGT | 1620 |
| <b>PB1 246038 Method S</b> | 1561 | GCTGACATGAGCATTGGCGTCACAGTGATAAAGAACAACATGATAAACAATGACCTTGGT | 1620 |
| <b>PB1 246038 Method E</b> | 1561 | GCTGACATGAGCATTGGCGTCACAGTGATAAAGAACAACATGATAAACAATGACCTTGGT | 1620 |
| <b>PB1 246038 Method K</b> | 1561 | GCTGACATGAGCATTGGCGTCACAGTGATAAAGAACAACATGATAAACAATGACCTTGGT | 1620 |
| <b>PB1 246038 Method N</b> | 1561 | GCTGACATGAGCATTGGCGTCACAGTGATAAAGAACAACATGATAAACAATGACCTTGGT | 1620 |

|                            |      |                                                               |      |
|----------------------------|------|---------------------------------------------------------------|------|
| <b>PB1 246038 MiSeq</b>    | 1621 | CCAGCAACAGCTCAAATGGCCCTTCAACTATTTCATCAAAGATTACAGGTACACGTACCGA | 1680 |
| <b>PB1 246038 Method A</b> | 1621 | CCAGCAACAGCTCAAATGGCCCTTCAACTATTTCATCAAAGATTACAGGTACACGTACCGA | 1680 |
| <b>PB1 246038 Method S</b> | 1621 | CCAGCAACAGCTCAAATGGCCCTTCAACTATTTCATCAAAGATTACAGGTACACGTACCGA | 1680 |
| <b>PB1 246038 Method E</b> | 1621 | CCAGCAACAGCTCAAATGGCCCTTCAACTATTTCATCAAAGATTACAGGTACACGTACCGA | 1680 |
| <b>PB1 246038 Method K</b> | 1621 | CCAGCAACAGCTCAAATGGCCCTTCAACTATTTCATCAAAGATTACAGGTACACGTACCGA | 1680 |
| <b>PB1 246038 Method N</b> | 1621 | CCAGCAACAGCTCAAATGGCCCTTCAACTATTTCATCAAAGATTACAGGTACACGTACCGA | 1680 |

|                            |      |                                                               |      |
|----------------------------|------|---------------------------------------------------------------|------|
| <b>PB1 246038 MiSeq</b>    | 1681 | TGCCACAGAGGTGACACACAAATTCAAACGAGGAGATCATTTCGAGCTGAAGAAGCTGTGG | 1740 |
| <b>PB1 246038 Method A</b> | 1681 | TGCCACAGAGGTGACACACAAATTCAAACGAGGAGATCATTTCGAGCTGAAGAAGCTGTGG | 1740 |
| <b>PB1 246038 Method S</b> | 1681 | TGCCACAGAGGTGACACACAAATTCAAACGAGGAGATCATTTCGAGCTGAAGAAGCTGTGG | 1740 |
| <b>PB1 246038 Method E</b> | 1681 | TGCCACAGAGGTGACACACAAATTCAAACGAGGAGATCATTTCGAGCTGAAGAAGCTGTGG | 1740 |
| <b>PB1 246038 Method K</b> | 1681 | TGCCACAGAGGTGACACACAAATTCAAACGAGGAGATCATTTCGAGCTGAAGAAGCTGTGG | 1740 |
| <b>PB1 246038 Method N</b> | 1681 | TGCCACAGAGGTGACACACAAATTCAAACGAGGAGATCATTTCGAGCTGAAGAAGCTGTGG | 1740 |

|                            |      |                                                                |      |
|----------------------------|------|----------------------------------------------------------------|------|
| <b>PB1 246038 MiSeq</b>    | 1741 | GAACAGACCCGTTCAAAGGCAGGACTGTTGGTGTGTCAGATGGAGGACCAAATCTATACAAC | 1800 |
| <b>PB1 246038 Method A</b> | 1741 | GAACAGACCCGTTCAAAGGCAGGACTGTTGGTGTGTCAGATGGAGGACCAAATCTATACAAC | 1800 |
| <b>PB1 246038 Method S</b> | 1741 | GAACAGACCCGTTCAAAGGCAGGACTGTTGGTGTGTCAGATGGAGGACCAAATCTATACAAC | 1800 |
| <b>PB1 246038 Method E</b> | 1741 | GAACAGACCCGTTCAAAGGCAGGACTGTTGGTGTGTCAGATGGAGGACCAAATCTATACAAC | 1800 |
| <b>PB1 246038 Method K</b> | 1741 | GAACAGACCCGTTCAAAGGCAGGACTGTTGGTGTGTCAGATGGAGGACCAAATCTATACAAC | 1800 |
| <b>PB1 246038 Method N</b> | 1741 | GAACAGACCCGTTCAAAGGCAGGACTGTTGGTGTGTCAGATGGAGGACCAAATCTATACAAC | 1800 |

|                            |      |                                                               |      |
|----------------------------|------|---------------------------------------------------------------|------|
| <b>PB1 246038 MiSeq</b>    | 1801 | ATTTCGGAATCTCCATATCCCAGAGGTCTGCTTGAAGTGGGAGCTGATGGACGAAGATTAC | 1860 |
| <b>PB1 246038 Method A</b> | 1801 | ATTTCGGAATCTCCATATCCCAGAGGTCTGCTTGAAGTGGGAGCTGATGGACGAAGATTAC | 1860 |
| <b>PB1 246038 Method S</b> | 1801 | ATTTCGGAATCTCCATATCCCAGAGGTCTGCTTGAAGTGGGAGCTGATGGACGAAGATTAC | 1860 |
| <b>PB1 246038 Method E</b> | 1801 | ATTTCGGAATCTCCATATCCCAGAGGTCTGCTTGAAGTGGGAGCTGATGGACGAAGATTAC | 1860 |
| <b>PB1 246038 Method K</b> | 1801 | ATTTCGGAATCTCCATATCCCAGAGGTCTGCTTGAAGTGGGAGCTGATGGACGAAGATTAC | 1860 |
| <b>PB1 246038 Method N</b> | 1801 | ATTTCGGAATCTCCATATCCCAGAGGTCTGCTTGAAGTGGGAGCTGATGGACGAAGATTAC | 1860 |

|                            |      |                                                              |      |
|----------------------------|------|--------------------------------------------------------------|------|
| <b>PB1 246038 MiSeq</b>    | 1861 | CAGGGCAGGTTGTGTAATCCTCTGAACCCATTTGTCAGTCATAAAGAAATTGAGTCCGTA | 1920 |
| <b>PB1 246038 Method A</b> | 1861 | CAGGGCAGGTTGTGTAATCCTCTGAACCCATTTGTCAGTCATAAAGAAATTGAGTCCGTA | 1920 |
| <b>PB1 246038 Method S</b> | 1861 | CAGGGCAGGTTGTGTAATCCTCTGAACCCATTTGTCAGTCATAAAGAAATTGAGTCCGTA | 1920 |
| <b>PB1 246038 Method E</b> | 1861 | CAGGGCAGGTTGTGTAATCCTCTGAACCCATTTGTCAGTCATAAAGAAATTGAGTCCGTA | 1920 |
| <b>PB1 246038 Method K</b> | 1861 | CAGGGCAGGTTGTGTAATCCTCTGAACCCATTTGTCAGTCATAAAGAAATTGAGTCCGTA | 1920 |
| <b>PB1 246038 Method N</b> | 1861 | CAGGGCAGGTTGTGTAATCCTCTGAACCCATTTGTCAGTCATAAAGAAATTGAGTCCGTA | 1920 |

|                            |      |                                                              |      |
|----------------------------|------|--------------------------------------------------------------|------|
| <b>PB1 246038 MiSeq</b>    | 1921 | AACAATGCTGTGGTGATGCCAGCACACGGTCCAGCCAAAAGCATGGAATATGATGCCATT | 1980 |
| <b>PB1 246038 Method A</b> | 1921 | AACAATGCTGTGGTGATGCCAGCACACGGTCCAGCCAAAAGCATGGAATATGATGCCATT | 1980 |
| <b>PB1 246038 Method S</b> | 1921 | AACAATGCTGTGGTGATGCCAGCACACGGTCCAGCCAAAAGCATGGAATATGATGCCATT | 1980 |
| <b>PB1 246038 Method E</b> | 1921 | AACAATGCTGTGGTGATGCCAGCACACGGTCCAGCCAAAAGCATGGAATATGATGCCATT | 1980 |
| <b>PB1 246038 Method K</b> | 1921 | AACAATGCTGTGGTGATGCCAGCACACGGTCCAGCCAAAAGCATGGAATATGATGCCATT | 1980 |
| <b>PB1 246038 Method N</b> | 1921 | AACAATGCTGTGGTGATGCCAGCACACGGTCCAGCCAAAAGCATGGAATATGATGCCATT | 1980 |

|                            |      |                                                               |      |
|----------------------------|------|---------------------------------------------------------------|------|
| <b>PB1 246038 MiSeq</b>    | 1981 | GCGACTACACACTCATGGATTCCCTAAAAGGAATCGTTCCATTCTCAATACCAGTCAAAGG | 2040 |
| <b>PB1 246038 Method A</b> | 1981 | GCGACTACACACTCATGGATTCCCTAAAAGGAATCGTTCCATTCTCAATACCAGTCAAAGG | 2040 |
| <b>PB1 246038 Method S</b> | 1981 | GCGACTACACACTCATGGATTCCCTAAAAGGAATCGTTCCATTCTCAATACCAGTCAAAGG | 2040 |
| <b>PB1 246038 Method E</b> | 1981 | GCGACTACACACTCATGGATTCCCTAAAAGGAATCGTTCCATTCTCAATACCAGTCAAAGG | 2040 |
| <b>PB1 246038 Method K</b> | 1981 | GCGACTACACACTCATGGATTCCCTAAAAGGAATCGTTCCATTCTCAATACCAGTCAAAGG | 2040 |
| <b>PB1 246038 Method N</b> | 1981 | GCGACTACACACTCATGGATTCCCTAAAAGGAATCGTTCCATTCTCAATACCAGTCAAAGG | 2040 |

|                            |      |                                                               |      |
|----------------------------|------|---------------------------------------------------------------|------|
| <b>PB1 246038 MiSeq</b>    | 2041 | GGAATTCTTGAGGATGAACAGATGTACCAGAAATGCTGCAGTCTATTTCGAAAAATTTTTT | 2100 |
| <b>PB1 246038 Method A</b> | 2041 | GGAATTCTTGAGGATGAACAGATGTACCAGAAATGCTGCAGTCTATTTCGAAAAATTTTTT | 2100 |
| <b>PB1 246038 Method S</b> | 2041 | GGAATTCTTGAGGATGAACAGATGTACCAGAAATGCTGCAGTCTATTTCGAAAAATTTTTT | 2100 |
| <b>PB1 246038 Method E</b> | 2041 | GGAATTCTTGAGGATGAACAGATGTACCAGAAATGCTGCAGTCTATTTCGAAAAATTTTTT | 2100 |
| <b>PB1 246038 Method K</b> | 2041 | GGAATTCTTGAGGATGAACAGATGTACCAGAAATGCTGCAGTCTATTTCGAAAAATTTTTT | 2100 |
| <b>PB1 246038 Method N</b> | 2041 | GGAATTCTTGAGGATGAACAGATGTACCAGAAATGCTGCAGTCTATTTCGAAAAATTTTTT | 2100 |

|                            |      |                                                              |      |
|----------------------------|------|--------------------------------------------------------------|------|
| <b>PB1 246038 MiSeq</b>    | 2101 | CCCAGTAGTTCATACAGGAGACCAGTTGGAATTTCCAGCATGGTGGAGGCCATGGTGTCT | 2160 |
| <b>PB1 246038 Method A</b> | 2101 | CCCAGTAGTTCATACAGGAGACCAGTTGGAATTTCCAGCATGGTGGAGGCCATGGTGTCT | 2160 |
| <b>PB1 246038 Method S</b> | 2101 | CCCAGTAGTTCATACAGGAGACCAGTTGGAATTTCCAGCATGGTGGAGGCCATGGTGTCT | 2160 |
| <b>PB1 246038 Method E</b> | 2101 | CCCAGTAGTTCATACAGGAGACCAGTTGGAATTTCCAGCATGGTGGAGGCCATGGTGTCT | 2160 |
| <b>PB1 246038 Method K</b> | 2101 | CCCAGTAGTTCATACAGGAGACCAGTTGGAATTTCCAGCATGGTGGAGGCCATGGTGTCT | 2160 |
| <b>PB1 246038 Method N</b> | 2101 | CCCAGTAGTTCATACAGGAGACCAGTTGGAATTTCCAGCATGGTGGAGGCCATGGTGTCT | 2160 |

|                            |      |                                                              |      |
|----------------------------|------|--------------------------------------------------------------|------|
| <b>PB1 246038 MiSeq</b>    | 2161 | AGGGCCCGAATCGATGCACGCATTGATTTTCAATCTGGAAGGATCAAGAAGGGAGAGTTT | 2220 |
| <b>PB1 246038 Method A</b> | 2161 | AGGGCCCGAATCGATGCACGCATTGATTTTCAATCTGGAAGGATCAAGAAGGGAGAGTTT | 2220 |
| <b>PB1 246038 Method S</b> | 2161 | AGGGCCCGAATCGATGCACGCATTGATTTTCAATCTGGAAGGATCAAGAAGGGAGAGTTT | 2220 |
| <b>PB1 246038 Method E</b> | 2161 | AGGGCCCGAATCGATGCACGCATTGATTTTCAATCTGGAAGGATCAAGAAGGGAGAGTTT | 2220 |
| <b>PB1 246038 Method K</b> | 2161 | AGGGCCCGAATCGATGCACGCATTGATTTTCAATCTGGAAGGATCAAGAAGGGAGAGTTT | 2220 |
| <b>PB1 246038 Method N</b> | 2161 | AGGGCCCGAATCGATGCACGCATTGATTTTCAATCTGGAAGGATCAAGAAGGGAGAGTTT | 2220 |

|                            |      |                                                        |      |
|----------------------------|------|--------------------------------------------------------|------|
| <b>PB1 246038 MiSeq</b>    | 2221 | TCTGAGATCATGAAGATCTGTTCCACCATTGAAGAGCTCAGACGGCAAAAATAG | 2274 |
| <b>PB1 246038 Method A</b> | 2221 | TCTGAGATCATGAAGATCTGTTCCACCATTGAAGAGCTCAGACGGCAAAAATAG | 2274 |
| <b>PB1 246038 Method S</b> | 2221 | TCTGAGATCATGAAGATCTGTTCCACCATTGAAGAGCTCAGACGGCAAAAATAG | 2274 |
| <b>PB1 246038 Method E</b> | 2221 | TCTGAGATCATGAAGATCTGTTCCACCATTGAAGAGCTCAGACGGCAAAAATAG | 2274 |
| <b>PB1 246038 Method K</b> | 2221 | TCTGAGATCATGAAGATCTGTTCCACCATTGAAGAGCTCAGACGGCAAAAATAG | 2274 |
| <b>PB1 246038 Method N</b> | 2221 | TCTGAGATCATGAAGATCTGTTCCACCATTGAAGAGCTCAGACGGCAAAAATAG | 2274 |
