# Supplementary material for: An Evaluation of Avian Influenza Virus Whole Genome Sequencing Approaches Using Nanopore Technology
Source: Preprints.org preprint supplement (doi:10.20944/preprints202301.0480.v1), 2023-01-26
Supplement: Supplementary file 25 [file supplementary]

## Formatted Alignments

|                    |     |                                                               |     |
|--------------------|-----|---------------------------------------------------------------|-----|
| PA 245625 MiSeq    | 1   | ATGGAAGACTTTGTGCGACAATGCTTCAATCCAATGATTGTCGAGCTTGCGGAGAAAGCA  | 60  |
| PA 245626 Method A | 1   | ATGGAAGACTTTGTGCGACAATGCTTCAATCCAATGATTGTCGAGCTTGCGGAGAAAGCA  | 60  |
| PA 245626 Method K | 1   | ATGGAAGACTTTGTGCGACAATGCTTCAATCCAATGATTGTCGAGCTTGCGGAGAAAGCA  | 60  |
| PA 245626 Method N | 1   | ATGGAAGATTTTGTGCGACAATGCTTCAATCCAATGATTGTCGAGCTTGCGGAGAAAGCA  | 60  |
| PA 245625 MiSeq    | 61  | ATGAAAGAATATGGGGAAGATCCGAAAATCGAGACAAACAAATTTGCCGCAATATGCACA  | 120 |
| PA 245626 Method A | 61  | ATGAAAGAATATGGGGAAGATCCGAAAATCGAGACAAACAAATTTGCCGCAATATGCACA  | 120 |
| PA 245626 Method K | 61  | ATGAAAGAATATGGGGAAGATCCGAAAATCGAGACAAACAAATTTGCCGCAATATGCACA  | 120 |
| PA 245626 Method N | 61  | ATGAAAGAATATGGGGAAGATCCGAAAATCGAGACAAACAAATTTGCCGCAATATGCACA  | 120 |
| PA 245625 MiSeq    | 121 | CAC TTAGAAGTCTGTTTCATGTATTCGGATTTCCATTTTATTGATGAACGAGGCGAATCA | 180 |
| PA 245626 Method A | 121 | CAC TTAGAAGTCTGTTTCATGTATTCGGATTTCCATTTTATTGATGAACGAGGCGAATCA | 180 |
| PA 245626 Method K | 121 | CAC TTAGAAGTCTGTTTCATGTATTCGGATTTCCATTTTATTGATGAACGAGGCGAATCA | 180 |
| PA 245626 Method N | 121 | CAC TTAGAAGTCTGTTTCATGTATTCGGATTTCCATTTTATTGATGAACGAGGCGAATCA | 180 |
| PA 245625 MiSeq    | 181 | ATGATTGTAGAATCTGGCGATCCAAATGCATTATTGAAACACCGATTTGAGATAATCGAA  | 240 |
| PA 245626 Method A | 181 | ATGATTGTAGAATCTGGCGATCCAAATGCATTATTGAAACACCGATTTGAGATAATCGAA  | 240 |
| PA 245626 Method K | 181 | ATGATTGTAGAATCTGGCGATCCAAATGCATTATTGAAACACCGATTTGAGATAATCGAA  | 240 |
| PA 245626 Method N | 181 | ATGATTGTAGAATCTGGCGATCCAAATGCATTATTGAAACACCGATTTGAGATAATCGAA  | 240 |
| PA 245625 MiSeq    | 241 | GGGAGAGACCGAGCAATGGCCTGGACAGTGGTGAATAGTATCTGCAACACCACAGGGGTC  | 300 |
| PA 245626 Method A | 241 | GGGAGAGACCGAGCAATGGCCTGGACAGTGGTGAATAGTATCTGCAACACCACAGGGGTC  | 300 |
| PA 245626 Method K | 241 | GGGAGAGACCGAGCAATGGCCTGGACAGTGGTGAATAGTATCTGCAACACCACAGGGGTC  | 300 |
| PA 245626 Method N | 241 | GGGAGAGACCGAGCAATGGCCTGGACAGTGGTGAATAGTATCTGCAACACCACAGGGGTC  | 300 |
| PA 245625 MiSeq    | 301 | GAAAAGCCCAAATTCCTCCCTGATTGTATGACTACAAAGAGAACCGATTCATTGAAATT   | 360 |
| PA 245626 Method A | 301 | GAAAAGCCCAAATTCCTCCCTGATTGTATGACTACAAAGAGAACCGATTCATTGAAATT   | 360 |
| PA 245626 Method K | 301 | GAAAAGCCCAAATTCCTCCCTGATTGTATGACTACAAAGAGAACCGATTCATTGAAATT   | 360 |
| PA 245626 Method N | 301 | GAAAAGCCCAAATTCCTCCCTGATTGTATGACTACAAAGAGAACCGATTCATTGAAATT   | 360 |

|                    |     |                                                              |     |
|--------------------|-----|--------------------------------------------------------------|-----|
| PA 245625 MiSeq    | 361 | GGAGTAACGCGAAGGGAAGTTCACATATACTATTTAGAAAAAGCCAACAAGATAAAATCA | 420 |
| PA 245626 Method A | 361 | GGAGTAACGCGAAGGGAAGTTCACATATACTATTTAGAAAAAGCCAACAAGATAAAATCA | 420 |
| PA 245626 Method K | 361 | GGAGTAACGCGAAGGGAAGTTCACATATACTATTTAGAAAAAGCCAACAAGATAAAATCA | 420 |
| PA 245626 Method N | 361 | GGAGTAACGCGAAGGGAAGTTCACATATACTATTTAGAAAAAGCCAACAAGATAAAATCA | 420 |

|                    |     |                                                              |     |
|--------------------|-----|--------------------------------------------------------------|-----|
| PA 245625 MiSeq    | 421 | GAGAAAACACATATTCACATATTCTCATTCACTGGAGAGGAAATGGCCACCAAGGCGGAC | 480 |
| PA 245626 Method A | 421 | GAGAAAACACATATTCACATATTCTCATTCACTGGAGAGGAAATGGCCACCAAGGCGGAC | 480 |
| PA 245626 Method K | 421 | GAGAAAACACATATTCACATATTCTCATTCACTGGAGAGGAAATGGCCACCAAGGCGGAC | 480 |
| PA 245626 Method N | 421 | GAGAAAACACATATTCACATATTCTCATTCACTGGAGAGGAAATGGCCACCAAGGCGGAC | 480 |

|                    |     |                                                               |     |
|--------------------|-----|---------------------------------------------------------------|-----|
| PA 245625 MiSeq    | 481 | TACACCCTTGATGAAGAGAGCAGAGCAAGAATAAAAAACCAGACTGTTCACTATAAGACAA | 540 |
| PA 245626 Method A | 481 | TACACCCTTGATGAAGAGAGCAGAGCAAGAATAAAAAACCAGACTGTTCACTATAAGACAA | 540 |
| PA 245626 Method K | 481 | TACACCCTTGATGAAGAGAGCAGAGCAAGAATAAAAAACCAGACTGTTCACTATAAGACAA | 540 |
| PA 245626 Method N | 481 | TACACCCTTGATGAAGAGAGCAGAGCAAGAATAAAAAACCAGACTGTTCACTATAAGACAA | 540 |

|                    |     |                                                              |     |
|--------------------|-----|--------------------------------------------------------------|-----|
| PA 245625 MiSeq    | 541 | GAAATAGCCAGCAGAGGTCTATGGGATTCCTTTCGTCAGTCCGAGAGAGGCGAAGAGACA | 600 |
| PA 245626 Method A | 541 | GAAATAGCCAGCAGAGGTCTATGGGATTCCTTTCGTCAGTCCGAGAGAGGCGAAGAGACA | 600 |
| PA 245626 Method K | 541 | GAAATAGCCAGCAGAGGTCTATGGGATTCCTTTCGTCAGTCCGAGAGAGGCGAAGAGACA | 600 |
| PA 245626 Method N | 541 | GAAATAGCCAGCAGAGGTCTATGGGATTCCTTTCGTCAGTCCGAGAGAGGCGAAGAGACA | 600 |

|                    |     |                                                               |     |
|--------------------|-----|---------------------------------------------------------------|-----|
| PA 245625 MiSeq    | 601 | ATTGAAGAAAAGATTTGAAATCACAGGAACCATGCGCAGGCTTGCCGACCAAAGTCTTCCA | 660 |
| PA 245626 Method A | 601 | ATTGAAGAAAAGATTTGAAATCACAGGAACCATGCGCAGGCTTGCCGACCAAAGTCTTCCA | 660 |
| PA 245626 Method K | 601 | ATTGAAGAAAAGATTTGAAATCACAGGAACCATGCGCAGGCTTGCCGACCAAAGTCTTCCA | 660 |
| PA 245626 Method N | 601 | ATTGAAGAAAAGATTTGAAATCACAGGAACCATGCGCAGGCTTGCCGACCAAAGTCTTCCA | 660 |

|                    |     |                                                                 |     |
|--------------------|-----|-----------------------------------------------------------------|-----|
| PA 245625 MiSeq    | 661 | CCGAACCTTCTCCAGCCTTGAAAACCTTTAGAGCCTATGTGGATGGATTTCGAACCGAACGGC | 720 |
| PA 245626 Method A | 661 | CCGAACCTTCTCCAGCCTTGAAAACCTTTAGAGCCTATGTGGATGGATTTCGAACCGAACGGC | 720 |
| PA 245626 Method K | 661 | CCGAACCTTCTCCAGCCTTGAAAACCTTTAGAGCCTATGTGGATGGATTTCGAACCGAACGGC | 720 |
| PA 245626 Method N | 661 | CCGAACCTTCTCCAGCCTTGAAAACCTTTAGAGCCTATGTGGATGGATTTCGAACCGAACGGC | 720 |

|                    |      |                                                               |      |
|--------------------|------|---------------------------------------------------------------|------|
| PA 245625 MiSeq    | 721  | TGCATTGAGGGCAAACCTTTCTCAAATGTCAAAAGAAGTGAACGCCAGAATTGAGCCATTT | 780  |
| PA 245626 Method A | 721  | TGCATTGAGGGCAAACCTTTCTCAAATGTCAAAAGAAGTGAACGCCAGAATTGAGCCATTT | 780  |
| PA 245626 Method K | 721  | TGCATTGAGGGCAAACCTTTCTCAAATGTCAAAAGAAGTGAACGCCAGAATTGAGCCATTT | 780  |
| PA 245626 Method N | 721  | TGCATTGAGGGCAAACCTTTCTCAAATGTCAAAAGAAGTGAACGCCAGAATTGAGCCATTT | 780  |
| PA 245625 MiSeq    | 781  | CTGAAGACAACACCACGCCCTCTCAGATTACCTGATGGGCCTCCCTGTTCTCAGCGGTCTG | 840  |
| PA 245626 Method A | 781  | CTGAAGACAACACCACGCCCTCTCAGATTACCTGATGGGCCTCCCTGTTCTCAGCGGTCTG | 840  |
| PA 245626 Method K | 781  | CTGAAGACAACACCACGCCCTCTCAGATTACCTGATGGGCCTCCCTGTTCTCAGCGGTCTG | 840  |
| PA 245626 Method N | 781  | CTGAAGACAACACCACGCCCTCTCAGATTACCTGATGGGCCTCCCTGTTCTCAGCGGTCTG | 840  |
| PA 245625 MiSeq    | 841  | AAGTTCTTGCTGATGGATGCCCTTAAGTTGAGCATCGAAGACCCTAGCCATGAGGGGGAG  | 900  |
| PA 245626 Method A | 841  | AAGTTCTTGCTGATGGATGCCCTTAAGTTGAGCATCGAAGACCCTAGCCATGAGGGGGAGG | 900  |
| PA 245626 Method K | 841  | AAGTTCTTGCTGATGGATGCCCTTAAGTTGAGCATCGAAGACCCTAGCCATGAGGGGGAG  | 900  |
| PA 245626 Method N | 841  | AAGTTCTTGCTGATGGATGCCCTTAAGTTGAGCATCGAAGACCCTAGCCATGAGGGGGAG  | 900  |
| PA 245625 MiSeq    | 901  | GGCATACCGCTGTATGATGCAATCAAATGCATGAAGACATTTTTTGGCTGGAAAGAGCCC  | 960  |
| PA 245626 Method A | 901  | GGCATACCGCTGTATGATGCAATCAAATGCATGAAGACATTTTTTGGCTGGAAAGAGCCC  | 960  |
| PA 245626 Method K | 901  | GGCATACCGCTGTATGATGCAATCAAATGCATGAAGACATTTTTTGGCTGGAAAGAGCCC  | 960  |
| PA 245626 Method N | 901  | GGCATACCGCTGTATGATGCAATCAAATGCATGAAGACATTTTTTGGCTGGAAAGAGCCC  | 960  |
| PA 245625 MiSeq    | 961  | AACATCGTAAAGCCGCATGAGAAAGGCATAAACCCCTAATTACCTCCTGGCTTGGAAGCAG | 1020 |
| PA 245626 Method A | 961  | AACATCGTAAAGCCGCATGAGAAAGGCATAAACCCCTAATTACCTCCTGGCTTGGAAGCAG | 1020 |
| PA 245626 Method K | 961  | AACATCGTAAAGCCGCATGAGAAAGGCATAAACCCCTAATTACCTCCTGGCTTGGAAGCAG | 1020 |
| PA 245626 Method N | 961  | AACATCGTAAAGCCGCATGAGAAAGGCATAAACCCCTAATTACCTCCTGGCTTGGAAGCAG | 1020 |
| PA 245625 MiSeq    | 1021 | GTGCTGGCAGAACTTCAAGACATTGAAAATGAGGAGAAAATTCCAAAAACAAAGAACATG  | 1080 |
| PA 245626 Method A | 1021 | GTGCTGGCAGAACTTCAAGACATTGAAAATGAGGAGAAAATTCCAAAAACAAAGAACATG  | 1080 |
| PA 245626 Method K | 1021 | GTGCTGGCAGAACTTCAAGACATTGAAAATGAGGAGAAAATTCCAAAAACAAAGAACATG  | 1080 |
| PA 245626 Method N | 1021 | GTGCTGGCAGAACTTCAAGACATTGAAAATGAGGAGAAAATTCCAAAAACAAAGAACATG  | 1080 |

|                    |      |                                                              |      |
|--------------------|------|--------------------------------------------------------------|------|
| PA 245625 MiSeq    | 1081 | AAGAAAACAAGCCAATTGAAGTGGGCACTTGGTGAGAACATGGCTCCAGAAAAAGTGGAC | 1140 |
| PA 245626 Method A | 1081 | AAGAAAACAAGCCAATTGAAGTGGGCACTTGGTGAGAACATGGCTCCAGAAAAAGTGGAC | 1140 |
| PA 245626 Method K | 1081 | AAGAAAACAAGCCAATTGAAGTGGGCACTTGGTGAGAACATGGCTCCAGAAAAAGTGGAC | 1140 |
| PA 245626 Method N | 1081 | AAGAAAACAAGCCAATTGAAGTGGGCACTTGGTGAGAACATGGCTCCAGAAAAAGTGGAC | 1140 |

|                    |      |                                                              |      |
|--------------------|------|--------------------------------------------------------------|------|
| PA 245625 MiSeq    | 1141 | TTTGAGGACTGCAAAGATGTTAGCGATCTAAGACAGTACGACAGTGACGAACCAGAGTCT | 1200 |
| PA 245626 Method A | 1141 | TTTGAGGACTGCAAAGATGTTAGCGATCTAAGACAGTACGACAGTGACGAACCAGAGTCT | 1200 |
| PA 245626 Method K | 1141 | TTTGAGGACTGCAAAGATGTTAGCGATCTAAGACAGTACGACAGTGACGAACCAGAGTCT | 1200 |
| PA 245626 Method N | 1141 | TTTGAGGACTGCAAAGATGTTAGCGATCTAAGACAGTACGACAGTGACGAACCAGAGTCT | 1200 |

|                    |      |                                                                |      |
|--------------------|------|----------------------------------------------------------------|------|
| PA 245625 MiSeq    | 1201 | AGATCACTAGCAAGCTGGATTTCAGAGTGAATTCAACAAGGCATGCGAACTGACAGATTCTG | 1260 |
| PA 245626 Method A | 1201 | AGATCACTAGCAAGCTGGATTTCAGAGTGAATTCAACAAGGCATGCGAACTGACAGATTCTG | 1260 |
| PA 245626 Method K | 1201 | AGATCACTAGCAAGCTGGATTTCAGAGTGAATTCAACAAGGCATGCGAACTGACAGATTCTG | 1260 |
| PA 245626 Method N | 1201 | AGATCACTAGCAAGCTGGATTTCAGAGTGAATTCAACAAGGCATGCGAACTGACAGATTCTG | 1260 |

|                    |      |                                                              |      |
|--------------------|------|--------------------------------------------------------------|------|
| PA 245625 MiSeq    | 1261 | AGTTGGATTGAACTTGATGAGATAGGGGAAGACGTTGCTCCAATCGAACACATTGCGAGT | 1320 |
| PA 245626 Method A | 1261 | AGTTGGATTGAACTTGATGAGATAGGGGAAGACGTTGCTCCAATCGAACACATTGCGAGT | 1320 |
| PA 245626 Method K | 1261 | AGTTGGATTGAACTTGATGAGATAGGGGAAGACGTTGCTCCAATCGAACACATTGCGAGT | 1320 |
| PA 245626 Method N | 1261 | AGTTGGATTGAACTTGATGAGATAGGGGAAGACGTTGCTCCAATCGAACACATTGCGAGT | 1320 |

|                    |      |                                                              |      |
|--------------------|------|--------------------------------------------------------------|------|
| PA 245625 MiSeq    | 1321 | GTGAGGAGGAACATATTTACAGCGGAGGTATCCCATTCGAGGGCCACTGAATACATAATG | 1380 |
| PA 245626 Method A | 1321 | GTGAGGAGGAACATATTTACAGCGGAGGTATCCCATTCGAGGGCCACTGAATACATAATG | 1380 |
| PA 245626 Method K | 1321 | GTGAGGAGGAACATATTTACAGCGGAGGTATCCCATTCGAGGGCCACTGAATACATAATG | 1380 |
| PA 245626 Method N | 1321 | GTGAGGAGGAACATATTTACAGCGGAGGTATCCCATTCGAGGGCCACTGAATACATAATG | 1380 |

|                    |      |                                                              |      |
|--------------------|------|--------------------------------------------------------------|------|
| PA 245625 MiSeq    | 1381 | AAGGGAGTATACATAAACACAGCCCTATTGAATGCATCCTGTGCAGCCATGGATGACTTC | 1440 |
| PA 245626 Method A | 1381 | AAGGGAGTATACATAAACACAGCCCTATTGAATGCATCCTGTGCAGCCATGGATGACTTC | 1440 |
| PA 245626 Method K | 1381 | AAGGGAGTATACATAAACACAGCCCTATTGAATGCATCCTGTGCAGCCATGGATGACTTC | 1440 |
| PA 245626 Method N | 1381 | AAGGGAGTATACATAAACACAGCCCTATTGAATGCATCCTGTGCAGCCATGGATGACTTC | 1440 |

|                    |      |                                                              |      |
|--------------------|------|--------------------------------------------------------------|------|
| PA 245625 MiSeq    | 1441 | CAACTGATTCCAATGATAAGTAAGTGCAGAACTAAAGAAGGAAGACGGAAGACAAATCTG | 1500 |
| PA 245626 Method A | 1441 | CAACTGATTCCAATGATAAGTAAGTGCAGAACTAAAGAAGGAAGACGGAAGACAAATCTG | 1500 |
| PA 245626 Method K | 1441 | CAACTGATTCCAATGATAAGTAAGTGCAGAACTAAAGAAGGAAGACGGAAGACAAATCTG | 1500 |
| PA 245626 Method N | 1441 | CAACTGATTCCAATGATAAGTAAGTGCAGAACTAAAGAAGGAAGACGGAAGACAAATCTG | 1500 |

|                    |      |                                                              |      |
|--------------------|------|--------------------------------------------------------------|------|
| PA 245625 MiSeq    | 1501 | TATGGATTCATTATAAAAGGAAGATCCCATTTGAGGAATGACACCGATGTGGTAAACTTT | 1560 |
| PA 245626 Method A | 1501 | TATGGATTCATTATAAAAGGAAGATCCCATTTGAGGAATGACACCGATGTGGTAAACTTT | 1560 |
| PA 245626 Method K | 1501 | TATGGATTCATTATAAAAGGAAGATCCCATTTGAGGAATGACACCGATGTGGTAAACTTT | 1560 |
| PA 245626 Method N | 1501 | TATGGATTCATTATAAAAGGAAGATCCCATTTGAGGAATGACACCGATGTGGTAAACTTT | 1560 |

|                    |      |                                                              |      |
|--------------------|------|--------------------------------------------------------------|------|
| PA 245625 MiSeq    | 1561 | GTGAGCATGGAATTCTCTCTAACTGACCCGAGGCTAGAGCCACACAAATGGGAAAAGTAC | 1620 |
| PA 245626 Method A | 1561 | GTGAGCATGGAATTCTCTCTAACTGACCCGAGGCTAGAGCCACACAAATGGGAAAAGTAC | 1620 |
| PA 245626 Method K | 1561 | GTGAGCATGGAATTCTCTCTAACTGACCCGAGGCTAGAGCCACACAAATGGGAAAAGTAC | 1620 |
| PA 245626 Method N | 1561 | GTGAGCATGGAATTCTCTCTAACTGACCCGAGGCTAGAGCCACACAAATGGGAAAAGTAC | 1620 |

|                    |      |                                                               |      |
|--------------------|------|---------------------------------------------------------------|------|
| PA 245625 MiSeq    | 1621 | TGTGTTCTTGAGATAGGAGACATGCTCCTACGGACTGCAATAGGCCAAGTGTTCGAGGCCC | 1680 |
| PA 245626 Method A | 1621 | TGTGTTCTTGAGATAGGAGACATGCTCCTACGGACTGCAATAGGCCAAGTGTTCGAGGCCC | 1680 |
| PA 245626 Method K | 1621 | TGTGTTCTTGAGATAGGAGACATGCTCCTACGGACTGCAATAGGCCAAGTGTTCGAGGCCC | 1680 |
| PA 245626 Method N | 1621 | TGTGTTCTTGAGATAGGAGACATGCTCCTACGGACTGCAATAGGCCAAGTGTTCGAGGCCC | 1680 |

|                    |      |                                                               |      |
|--------------------|------|---------------------------------------------------------------|------|
| PA 245625 MiSeq    | 1681 | ATG TTCCTGTATGTGAGAACCAATGGGACTTCCAAGATCAAAATGAAATGGGGCATGGAG | 1740 |
| PA 245626 Method A | 1681 | ATG TTCCTGTATGTGAGAACCAATGGGACTTCCAAGATCAAAATGAAATGGGGCATGGAG | 1740 |
| PA 245626 Method K | 1681 | ATG TTCCTGTATGTGAGAACCAATGGGACTTCCAAGATCAAAATGAAATGGGGCATGGAG | 1740 |
| PA 245626 Method N | 1681 | ATG TTCCTGTATGTGAGAACCAATGGGACTTCCAAGATCAAAATGAAATGGGGCATGGAG | 1740 |

|                    |      |                                                              |      |
|--------------------|------|--------------------------------------------------------------|------|
| PA 245625 MiSeq    | 1741 | ATGAGGCGATGCCTTCTTCAGTCCCTTCAACAAATTGAGAGCATGATTGAGGCCGAATCT | 1800 |
| PA 245626 Method A | 1741 | ATGAGGCGATGCCTTCTTCAGTCCCTTCAACAAATTGAGAGCATGATTGAGGCCGAATCT | 1800 |
| PA 245626 Method K | 1741 | ATGAGGCGATGCCTTCTTCAGTCCCTTCAACAAATTGAGAGCATGATTGAGGCCGAATCT | 1800 |
| PA 245626 Method N | 1741 | ATGAGGCGATGCCTTCTTCAGTCCCTTCAACAAATTGAGAGCATGATTGAGGCCGAATCT | 1800 |

|                    |      |                                                              |      |
|--------------------|------|--------------------------------------------------------------|------|
| PA 245625 MiSeq    | 1801 | TCTGTCAAAGAGAAGGACATGTCCAAGGAATTCTTTGAAAACAAATCAGAAACATGGCCA | 1860 |
| PA 245626 Method A | 1801 | TCTGTCAAAGAGAAGGACATGTCCAAGGAATTCTTTGAAAACAAATCAGAAACATGGCCA | 1860 |
| PA 245626 Method K | 1801 | TCTGTCAAAGAGAAGGACATGTCCAAGGAATTCTTTGAAAACAAATCAGAAACATGGCCA | 1860 |
| PA 245626 Method N | 1801 | TCTGTCAAAGAGAAGGACATGTCCAAGGAATTCTTTGAAAACAAATCAGAAACATGGCCA | 1860 |

|                    |      |                                                              |      |
|--------------------|------|--------------------------------------------------------------|------|
| PA 245625 MiSeq    | 1861 | ATTGGAGAATCACCCAAAGGGGTGGAGGAAGGCTCTATTGGGAAAGTATGCAGAACATTG | 1920 |
| PA 245626 Method A | 1861 | ATTGGAGAATCACCCAAAGGGGTGGAGGAAGGCTCTATTGGGAAAGTATGCAGAACATTG | 1920 |
| PA 245626 Method K | 1861 | ATTGGAGAATCACCCAAAGGGGTGGAGGAAGGCTCTATTGGGAAAGTATGCAGAACATTG | 1920 |
| PA 245626 Method N | 1861 | ATTGGAGAATCACCCAAAGGGGTGGAGGAAGGCTCTATTGGGAAAGTATGCAGAACATTG | 1920 |

|                    |      |                                                                |      |
|--------------------|------|----------------------------------------------------------------|------|
| PA 245625 MiSeq    | 1921 | CTAGCAAAGTCTGTGTTCAACAGCCTATATGCATCTCCACAACCTCGAGGGGTTTTTCAGCT | 1980 |
| PA 245626 Method A | 1921 | CTAGCAAAGTCTGTGTTCAACAGCCTATATGCATCTCCACAAGCTCGAGGGGTTTTTCAGCT | 1980 |
| PA 245626 Method K | 1921 | CTAGCAAAGTCTGTGTTCAACAGCCTATATGCATCTCCACAACCTCGAGGGGTTTTTCAGCT | 1980 |
| PA 245626 Method N | 1921 | CTAGCAAAGTCTGTGTTCAACAGCCTATATGCATCTCCACAACCTCGAGGGGTTTTTCAGCT | 1980 |

|                    |      |                                                                |      |
|--------------------|------|----------------------------------------------------------------|------|
| PA 245625 MiSeq    | 1981 | GAATCAAGAAAATTGCTTCTCATTGTTTCAGGCACCTTAGGGACAACCTGGGACCTGGAACC | 2040 |
| PA 245626 Method A | 1981 | GAATCAAGAAAATTGCTTCTCATTGTTTCAGGCACCTTAGGGACAACCTGGGACCTGGAACC | 2040 |
| PA 245626 Method K | 1981 | GAATCAAGAAAATTGCTTCTCATTGTTTCAGGCACCTTAGGGACAACCTGGGACCTGGAACC | 2040 |
| PA 245626 Method N | 1981 | GAATCAAGAAAATTGCTTCTCATTGTTTCAGGCACCTTAGGGACAACCTGGGACCTGGAACC | 2040 |

|                    |      |                                                               |      |
|--------------------|------|---------------------------------------------------------------|------|
| PA 245625 MiSeq    | 2041 | TTTCGATCTTGGGGGGCTATATGAAGCAATTGAGGAGTGCCTGATTAACGATCCCTGGGTT | 2100 |
| PA 245626 Method A | 2041 | TTTCGATCTTGGGGGGCTATATGAAGCAATTGAGGAGTGCCTGATTAACGATCCCTGGGTT | 2100 |
| PA 245626 Method K | 2041 | TTTCGATCTTGGGGGGCTATATGAAGCAATTGAGGAGTGCCTGATTAACGATCCCTGGGTT | 2100 |
| PA 245626 Method N | 2041 | TTTCGATCTTGGGGGGCTATATGAAGCAATTGAGGAGTGCCTGATTAACGATCCCTGGGTT | 2100 |

|                    |      |                                                     |      |
|--------------------|------|-----------------------------------------------------|------|
| PA 245625 MiSeq    | 2101 | TTGCTTAATGCGTCTTGGTTCAACTCCTTCCTCACACATGCACTGAAATAG | 2151 |
| PA 245626 Method A | 2101 | TTGCTTAATGCGTCTTGGTTCAACTCCTTCCTCACACATGCACTGAAATAG | 2151 |
| PA 245626 Method K | 2101 | TTGCTTAATGCGTCTTGGTTCAACTCCTTCCTCACACATGCACTGAAATAG | 2151 |
| PA 245626 Method N | 2101 | TTGCTTAATGCGTCTTGGTTCAACTCCTTCCTCACACATGCACTGAAATAG | 2151 |
