# Supplementary material for: An Evaluation of Avian Influenza Virus Whole Genome Sequencing Approaches Using Nanopore Technology
Source: Preprints.org preprint supplement (doi:10.20944/preprints202301.0480.v1), 2023-01-26
Supplement: Supplementary file 28 [file supplementary]

## Formatted Alignments

|                           |   |                                                               |    |
|---------------------------|---|---------------------------------------------------------------|----|
| <b>N1 245467 MiSeq</b>    | 1 | ATGAATCCAAATCAAAAGATAACAACCATTTGGATCAATCTGTATGGTAATTGGTATAGTC | 60 |
| <b>N1 245467 Method A</b> | 1 | ATGAATCCAAATCAAAAGATAACAACCATTTGGATCAATCTGTATGGTAATTGGTATAGTC | 60 |
| <b>N1 245467 Method S</b> | 1 | ATGAATCCAAATCAAAAGATAACAACCATTTGGATCAATCTGTATGGTAATTGGGATAGTC | 60 |
| <b>N1 245467 Method E</b> | 1 | ATGAATCCAAATCAAAAGATAACAACCATTTGGATCAATCTGTATGGTAATTGGTATAGTC | 60 |
| <b>N1 245467 Method K</b> | 1 | ATGAATCCAAATCAAAAGATAACAACCATTTGGATCAATCTGTATGGTAATTGGTATAGTC | 60 |
| <b>N1 245467 Method N</b> | 1 | ATGAATCCAAATCAAAAGATAACAACCATTTGGATCAATCTGTATGGTAATTGGTATAGTC | 60 |

|                           |    |                                                               |     |
|---------------------------|----|---------------------------------------------------------------|-----|
| <b>N1 245467 MiSeq</b>    | 61 | AGCTTGATGCTGCAAATTTGGGAACATAATCTCAATATGGGTTAGCCATTCAATCCAAACA | 120 |
| <b>N1 245467 Method A</b> | 61 | AGCTTGATGCTGCAAATTTGGGAACATAATCTCAATATGGGTTAGCCATTCAATCCAAACA | 120 |
| <b>N1 245467 Method S</b> | 61 | AGCTTGATGCTGCAAATTTGGGAATATAATCTCAATATGGGTTAGCCATTCAATCCAAACA | 120 |
| <b>N1 245467 Method E</b> | 61 | AGCTTGATGCTGCAAATTTGGGAACATAATCTCAATATGGGTTAGCCATTCAATCCAAACA | 120 |
| <b>N1 245467 Method K</b> | 61 | AGCTTGATGCTGCAAATTTGGGAACATAATCTCAATATGGGTTAGCCATTCAATCCAAACA | 120 |
| <b>N1 245467 Method N</b> | 61 | AGCTTGATGCTGCAAATTTGGGAACATAATCTCAATATGGGTTAGCCATTCAATCCAAACA | 120 |

|                           |     |                                                              |     |
|---------------------------|-----|--------------------------------------------------------------|-----|
| <b>N1 245467 MiSeq</b>    | 121 | GGGAATCAATACCAGCCTGAACCATGCAATCAAAGCATCATTACCTATGAGAACAACACC | 180 |
| <b>N1 245467 Method A</b> | 121 | GGGAATCAATACCAGCCTGAACCATGCAATCAAAGCATCATTACCTATGAGAACAACACC | 180 |
| <b>N1 245467 Method S</b> | 121 | GGGAATCAATACCAGCCTGAACCATGCAATCAAAGCATCATTACCTATGAGAACAACACC | 180 |
| <b>N1 245467 Method E</b> | 121 | GGGAATCAATACCAGCCTGAACCATGCAATCAAAGCATCATTACCTATGAGAACAACACC | 180 |
| <b>N1 245467 Method K</b> | 121 | GGGAATCAATACCAGCCTGAACCATGCAATCAAAGCATCATTACCTATGAGAACAACACC | 180 |
| <b>N1 245467 Method N</b> | 121 | GGGAATCAATACCAGCCTGAACCATGCAATCAAAGCATCATTACCTATGAGAACAACACC | 180 |

|                           |     |                                                              |     |
|---------------------------|-----|--------------------------------------------------------------|-----|
| <b>N1 245467 MiSeq</b>    | 181 | TGGGTAAATCAGACGTATGTCAACATCAGCAATACCAATTTTCTTGCTGAGCAGGCTGTT | 240 |
| <b>N1 245467 Method A</b> | 181 | TGGGTAAATCAGACGTATGTCAACATCAGCAATACCAATTTTCTTGCTGAGCAGGCTGTT | 240 |
| <b>N1 245467 Method S</b> | 181 | TGGGTAAATCAGACGTATGTCAACATCAGCAATACCAATTTTCTTGCTGAGCAGGCTGTT | 240 |
| <b>N1 245467 Method E</b> | 181 | TGGGTAAATCAGACGTATGTCAACATCAGCAATACCAATTTTCTTGCTGAGCAGGCTGTT | 240 |
| <b>N1 245467 Method K</b> | 181 | TGGGTAAATCAGACGTATGTCAACATCAGCAATACCAATTTTCTTGCTGAGCAGGCTGTT | 240 |
| <b>N1 245467 Method N</b> | 181 | TGGGTAAATCAGACGTATGTCAACATCAGCAATACCAATTTTCTTGCTGAGCAGGCTGTT | 240 |

|                           |     |                                                              |     |
|---------------------------|-----|--------------------------------------------------------------|-----|
| <b>N1 245467 MiSeq</b>    | 241 | ACTTCGGTAACATTAGCGGGCAATTCATCTCTTTGCCCTATTAGTGGGTGGGCAATATAC | 300 |
| <b>N1 245467 Method A</b> | 241 | ACTTCGGTAACATTAGCGGGCAATTCATCTCTTTGCCCTATTAGTGGGTGGGCAATATAC | 300 |
| <b>N1 245467 Method S</b> | 241 | ACTTCGGTAACATTAGCGGGCAATTCATCTCTTTGCCCTATTAGTGGGTGGGCAATATAC | 300 |
| <b>N1 245467 Method E</b> | 241 | ACTTCGGTAACATTAGCGGGCAATTCATCTCTTTGCCCTATTAGTGGGTGGGCAATATAC | 300 |
| <b>N1 245467 Method K</b> | 241 | ACTTCGGTAACATTAGCGGGCAATTCATCTCTTTGCCCTATTAGTGGGTGGGCAATATAC | 300 |
| <b>N1 245467 Method N</b> | 241 | ACTTCGGTAACATTAGCGGGCAATTCATCTCTTTGCCCTATTAGTGGGTGGGCAATATAC | 300 |

|                           |     |                                                                          |     |
|---------------------------|-----|--------------------------------------------------------------------------|-----|
| <b>N1 245467 MiSeq</b>    | 301 | AGTAAGGACAACGGTATAAGGATTGGGTCCAAGGGGGATGTGTTTGTATAAGAGAACCG              | 360 |
| <b>N1 245467 Method A</b> | 301 | AGTAAGGACAACGGTATAAGGATTGGGTCCAAGGGGGATGTGTTTGTATAAGAGAACCG              | 360 |
| <b>N1 245467 Method S</b> | 301 | AGTAAGGACAACGGTATAAG <sup>A</sup> ATTGGGTCCAAGGGGGATGTGTTTGTATAAGAGAACCG | 360 |
| <b>N1 245467 Method E</b> | 301 | AGTAAGGACAACGGTATAAGGATTGGGTCCAAGGGGGATGTGTTTGTATAAGAGAACCG              | 360 |
| <b>N1 245467 Method K</b> | 301 | AGTAAGGACAACGGTATAAGGATTGGGTCCAAGGGGGATGTGTTTGTATAAGAGAACCG              | 360 |
| <b>N1 245467 Method N</b> | 301 | AGTAAGGACAACGGTATAAGGATTGGGTCCAAGGGGGATGTGTTTGTATAAGAGAACCG              | 360 |

|                           |     |                                                             |     |
|---------------------------|-----|-------------------------------------------------------------|-----|
| <b>N1 245467 MiSeq</b>    | 361 | TTCATCTCATGCTCCCACTTGGAATGCAGAACCTTTTTCTGACCCAGGGAGCTCTGCTG | 420 |
| <b>N1 245467 Method A</b> | 361 | TTCATCTCATGCTCCCACTTGGAATGCAGAACCTTTTTCTGACCCAGGGAGCTCTGCTG | 420 |
| <b>N1 245467 Method S</b> | 361 | TTCATCTCATGCTCCCACTTGGAATGCAGAACCTTTTTCTGACCCAGGGAGCTCTGCTG | 420 |
| <b>N1 245467 Method E</b> | 361 | TTCATCTCATGCTCCCACTTGGAATGCAGAACCTTTTTCTGACCCAGGGAGCTCTGCTG | 420 |
| <b>N1 245467 Method K</b> | 361 | TTCATCTCATGCTCCCACTTGGAATGCAGAACCTTTTTCTGACCCAGGGAGCTCTGCTG | 420 |
| <b>N1 245467 Method N</b> | 361 | TTCATCTCATGCTCCCACTTGGAATGCAGAACCTTTTTCTGACCCAGGGAGCTCTGCTG | 420 |

|                           |     |                                                                           |     |
|---------------------------|-----|---------------------------------------------------------------------------|-----|
| <b>N1 245467 MiSeq</b>    | 421 | AATGACAAACATTCTAATGGGACCGTTAAGGATAGAAGCCCTTATAGAACTTTGATGAGT              | 480 |
| <b>N1 245467 Method A</b> | 421 | AATGACAAACATTCTAATGGGACCGTTAAGGATAGAAGCCCTTATAGAACTTTGATGAGT              | 480 |
| <b>N1 245467 Method S</b> | 421 | AATGACAAACATTCTAATGGGACCGTTAAGGATAGAAGCCC <sup>C</sup> TATAGAACTTTGATGAGT | 480 |
| <b>N1 245467 Method E</b> | 421 | AATGACAAACATTCTAATGGGACCGTTAAGGATAGAAGCCCTTATAGAACTTTGATGAGT              | 480 |
| <b>N1 245467 Method K</b> | 421 | AATGACAAACATTCTAATGGGACCGTTAAGGATAGAAGCCCTTATAGAACTTTGATGAGT              | 480 |
| <b>N1 245467 Method N</b> | 421 | AATGACAAACATTCTAATGGGACCGTTAAGGATAGAAGCCCTTATAGAACTTTGATGAGT              | 480 |

|                           |     |                                                              |     |
|---------------------------|-----|--------------------------------------------------------------|-----|
| <b>N1 245467 MiSeq</b>    | 481 | TGTCCCGTGGGTGAGGCTCCTTCCCCGTACAATTCAAGATTTGAGTCTGTTGCTTGGTCG | 540 |
| <b>N1 245467 Method A</b> | 481 | TGTCCCGTGGGTGAGGCTCCTTCCCCGTACAATTCAAGATTTGAGTCTGTTGCTTGGTCG | 540 |
| <b>N1 245467 Method S</b> | 481 | TGTCCCGTGGGTGAGGCTCCTTCCCCGTACAATTCAAGATTTGAGTCTGTTGCTTGGTCG | 540 |
| <b>N1 245467 Method E</b> | 481 | TGTCCCGTGGGTGAGGCTCCTTCCCCGTACAATTCAAGATTTGAGTCTGTTGCTTGGTCG | 540 |
| <b>N1 245467 Method K</b> | 481 | TGTCCCGTGGGTGAGGCTCCTTCCCCGTACAATTCAAGATTTGAGTCTGTTGCTTGGTCG | 540 |
| <b>N1 245467 Method N</b> | 481 | TGTCCCGTGGGTGAGGCTCCTTCCCCGTACAATTCAAGATTTGAGTCTGTTGCTTGGTCG | 540 |

|                           |     |                                                               |     |
|---------------------------|-----|---------------------------------------------------------------|-----|
| <b>N1 245467 MiSeq</b>    | 541 | GCAAGTGCTTGTTCATGATGGCATCAGTTGGTTGACAATCGGTATTTCTGGTCCAGACAAT | 600 |
| <b>N1 245467 Method A</b> | 541 | GCAAGTGCTTGTTCATGATGGCATCAGTTGGTTGACAATCGGTATTTCTGGTCCAGACAAT | 600 |
| <b>N1 245467 Method S</b> | 541 | GCAAGTGCTTGTTCATGATGGCATCAGTTGGTTGACAATCGGTATTTCTGGTCCAGACAAT | 600 |
| <b>N1 245467 Method E</b> | 541 | GCAAGTGCTTGTTCATGATGGCATCAGTTGGTTGACAATCGGTATTTCTGGTCCAGACAAT | 600 |
| <b>N1 245467 Method K</b> | 541 | GCAAGTGCTTGTTCATGATGGCATCAGTTGGTTGACAATCGGTATTTCTGGTCCAGACAAT | 600 |
| <b>N1 245467 Method N</b> | 541 | GCAAGTGCTTGTTCATGATGGCATCAGTTGGTTGACAATCGGTATTTCTGGTCCAGACAAT | 600 |

|                           |     |                                                              |     |
|---------------------------|-----|--------------------------------------------------------------|-----|
| <b>N1 245467 MiSeq</b>    | 601 | GGAGCTGTGGCTGTATTGAAGTACAATGGCATAATAACGGATACTATCAAGAGTTGGAGA | 660 |
| <b>N1 245467 Method A</b> | 601 | GGAGCTGTGGCTGTATTGAAGTACAATGGCATAATAACGGATACTATCAAGAGTTGGAGA | 660 |
| <b>N1 245467 Method S</b> | 601 | GGAGCTGTGGCTGTATTGAAGTACAATGGCATAATAACGGATACTATCAAGAGTTGGAGA | 660 |
| <b>N1 245467 Method E</b> | 601 | GGAGCTGTGGCTGTATTGAAGTACAATGGCATAATAACGGATACTATCAAGAGTTGGAGA | 660 |
| <b>N1 245467 Method K</b> | 601 | GGAGCTGTGGCTGTATTGAAGTACAATGGCATAATAACGGATACTATCAAGAGTTGGAGA | 660 |
| <b>N1 245467 Method N</b> | 601 | GGAGCTGTGGCTGTATTGAAGTACAATGGCATAATAACGGATACTATCAAGAGTTGGAGA | 660 |

|                           |     |                                                              |     |
|---------------------------|-----|--------------------------------------------------------------|-----|
| <b>N1 245467 MiSeq</b>    | 661 | AACAACATTTTGAGAACTCAAGAATCTGAATGTGCGTGCGTAAATGGCTCTTGCTTCACC | 720 |
| <b>N1 245467 Method A</b> | 661 | AACAACATTTTGAGAACTCAAGAATCTGAATGTGCGTGCGTAAATGGCTCTTGCTTCACC | 720 |
| <b>N1 245467 Method S</b> | 661 | AACAACATTTTGAGAACTCAAGAATCTGAATGTGCGTGCGTAAATGGCTCTTGCTTCACC | 720 |
| <b>N1 245467 Method E</b> | 661 | AACAACATTTTGAGAACTCAAGAATCTGAATGTGCGTGCGTAAATGGCTCTTGCTTCACC | 720 |
| <b>N1 245467 Method K</b> | 661 | AACAACATTTTGAGAACTCAAGAATCTGAATGTGCGTGCGTAAATGGCTCTTGCTTCACC | 720 |
| <b>N1 245467 Method N</b> | 661 | AACAACATTTTGAGAACTCAAGAATCTGAATGTGCGTGCGTAAATGGCTCTTGCTTCACC | 720 |

|                    |     |                                                                        |     |
|--------------------|-----|------------------------------------------------------------------------|-----|
| N1 245467 MiSeq    | 721 | GTAATGACTGATGGGCCAAGCAATGGGCAGGCCTCATATAAAATCTTCAAGATAGAGAAA           | 780 |
| N1 245467 Method A | 721 | GTAATGACTGATGGGCCAAGCAATGGGCAGGCCTCATATAAAATCTTCAAGATAGAGAAA           | 780 |
| N1 245467 Method S | 721 | GTAATGACTGATGGG <b>A</b> CCAAGCAATGGGCAGGCCTCATATAAAATCTTCAAGATAGAGAAA | 780 |
| N1 245467 Method E | 721 | GTAATGACTGATGGGCCAAGCAATGGGCAGGCCTCATATAAAATCTTCAAGATAGAGAAA           | 780 |
| N1 245467 Method K | 721 | GTAATGACTGATGGGCCAAGCAATGGGCAGGCCTCATATAAAATCTTCAAGATAGAGAAA           | 780 |
| N1 245467 Method N | 721 | GTAATGACTGATGGGCCAAGCAATGGGCAGGCCTCATATAAAATCTTCAAGATAGAGAAA           | 780 |

|                    |     |                                                             |     |
|--------------------|-----|-------------------------------------------------------------|-----|
| N1 245467 MiSeq    | 781 | GGGAAAGTTGTCAAATCAGTTGAATTGAATGCCCTAATTACCACTACGAGGAATGCTCC | 840 |
| N1 245467 Method A | 781 | GGGAAAGTTGTCAAATCAGTTGAATTGAATGCCCTAATTACCACTACGAGGAATGCTCC | 840 |
| N1 245467 Method S | 781 | GGGAAAGTTGTCAAATCAGTTGAATTGAATGCCCTAATTACCACTACGAGGAATGCTCC | 840 |
| N1 245467 Method E | 781 | GGGAAAGTTGTCAAATCAGTTGAATTGAATGCCCTAATTACCACTACGAGGAATGCTCC | 840 |
| N1 245467 Method K | 781 | GGGAAAGTTGTCAAATCAGTTGAATTGAATGCCCTAATTACCACTACGAGGAATGCTCC | 840 |
| N1 245467 Method N | 781 | GGGAAAGTTGTCAAATCAGTTGAATTGAATGCCCTAATTACCACTACGAGGAATGCTCC | 840 |

|                    |     |                                                                       |     |
|--------------------|-----|-----------------------------------------------------------------------|-----|
| N1 245467 MiSeq    | 841 | TGTTATCCTAATGCGGGTGATATTATGTGTGTGTGCAGGGACAATTGGCATGGCTCAAAC          | 900 |
| N1 245467 Method A | 841 | TGTTATCCTAATGCGGGTGATATTATGTGTGTGTGCAGGGACAATTGGCATGGCTCAAAC          | 900 |
| N1 245467 Method S | 841 | TGTTATCCT <b>G</b> ATGCGGGTGATATTATGTGTGTGTGCAGGGACAATTGGCATGGCTCAAAC | 900 |
| N1 245467 Method E | 841 | TGTTATCCTAATGCGGGTGATATTATGTGTGTGTGCAGGGACAATTGGCATGGCTCAAAC          | 900 |
| N1 245467 Method K | 841 | TGTTATCCTAATGCGGGTGATATTATGTGTGTGTGCAGGGACAATTGGCATGGCTCAAAC          | 900 |
| N1 245467 Method N | 841 | TGTTATCCTAATGCGGGTGATATTATGTGTGTGTGCAGGGACAATTGGCATGGCTCAAAC          | 900 |

|                    |     |                                                              |     |
|--------------------|-----|--------------------------------------------------------------|-----|
| N1 245467 MiSeq    | 901 | CGGCCGTGGGTATCTTTTAATCAAAATCTGGAGTATCAAATAGGATATATATGCAGTGGG | 960 |
| N1 245467 Method A | 901 | CGGCCGTGGGTATCTTTTAATCAAAATCTGGAGTATCAAATAGGATATATATGCAGTGGG | 960 |
| N1 245467 Method S | 901 | CGGCCGTGGGTATCTTTTAATCAAAATCTGGAGTATCAAATAGGATATATATGCAGTGGG | 960 |
| N1 245467 Method E | 901 | CGGCCGTGGGTATCTTTTAATCAAAATCTGGAGTATCAAATAGGATATATATGCAGTGGG | 960 |
| N1 245467 Method K | 901 | CGGCCGTGGGTATCTTTTAATCAAAATCTGGAGTATCAAATAGGATATATATGCAGTGGG | 960 |
| N1 245467 Method N | 901 | CGGCCGTGGGTATCTTTTAATCAAAATCTGGAGTATCAAATAGGATATATATGCAGTGGG | 960 |

|                           |     |                                                                |      |
|---------------------------|-----|----------------------------------------------------------------|------|
| <b>N1 245467 MiSeq</b>    | 961 | GTTTTTCGGGGGACAATCCCCGCCCCAATGATGGAACAGGCAGTTGCAGTCCAATGTCCTCT | 1020 |
| <b>N1 245467 Method A</b> | 961 | GTTTTTCGGGGGACAATCCCCGCCCCAATGATGGAACAGGCAGTTGCAGTCCAATGTCCTCT | 1020 |
| <b>N1 245467 Method S</b> | 961 | GTTTTTCGGGGGACAATCCCCGCCCCAATGATGGAACAGGCAGTTGCAGTCCAATGTCCTCT | 1020 |
| <b>N1 245467 Method E</b> | 961 | GTTTTTCGGGGGACAATCCCCGCCCCAATGATGGAACAGGCAGTTGCAGTCCAATGTCCTCT | 1020 |
| <b>N1 245467 Method K</b> | 961 | GTTTTTCGGGGGACAATCCCCGCCCCAATGATGGAACAGGCAGTTGCAGTCCAATGTCCTCT | 1020 |
| <b>N1 245467 Method N</b> | 961 | GTTTTTCGGGGGACAATCCCCGCCCCAATGATGGAACAGGCAGTTGCAGTCCAATGTCCTCT | 1020 |

|                           |      |                                                                    |      |
|---------------------------|------|--------------------------------------------------------------------|------|
| <b>N1 245467 MiSeq</b>    | 1021 | AATGGGGGCATATGGGGGTAAAAGGGTTTTTCATTTAAGTACGGTAATGGGGGTTTGGATCGGA   | 1080 |
| <b>N1 245467 Method A</b> | 1021 | AATGGGGGCATATGGGGGTAAAAGGGTTTTTCATTTAAGTACGGTAATGGGGGTTTGGATCGGA   | 1080 |
| <b>N1 245467 Method S</b> | 1021 | AA[G]GGGGGCATATGGGGGTAAAAGGGTTTTTCATTTAAGTACGGTAATGGGGGTTTGGATCGGA | 1080 |
| <b>N1 245467 Method E</b> | 1021 | AATGGGGGCATATGGGGGTAAAAGGGTTTTTCATTTAAGTACGGTAATGGGGGTTTGGATCGGA   | 1080 |
| <b>N1 245467 Method K</b> | 1021 | AATGGGGGCATATGGGGGTAAAAGGGTTTTTCATTTAAGTACGGTAATGGGGGTTTGGATCGGA   | 1080 |
| <b>N1 245467 Method N</b> | 1021 | AATGGGGGCATATGGGGGTAAAAGGGTTTTTCATTTAAGTACGGTAATGGGGGTTTGGATCGGA   | 1080 |

|                           |      |                                                              |      |
|---------------------------|------|--------------------------------------------------------------|------|
| <b>N1 245467 MiSeq</b>    | 1081 | AGAACAAAAAGCACTAGTTCCAGAAGCGGCTTTGAGATGATTTGGGATCCGAATGGGTGG | 1140 |
| <b>N1 245467 Method A</b> | 1081 | AGAACAAAAAGCACTAGTTCCAGAAGCGGCTTTGAGATGATTTGGGATCCGAATGGGTGG | 1140 |
| <b>N1 245467 Method S</b> | 1081 | AGAACAAAAAGCACTAGTTCCAGAAGCGGCTTTGAGATGATTTGGGATCCGAATGGGTGG | 1140 |
| <b>N1 245467 Method E</b> | 1081 | AGAACAAAAAGCACTAGTTCCAGAAGCGGCTTTGAGATGATTTGGGATCCGAATGGGTGG | 1140 |
| <b>N1 245467 Method K</b> | 1081 | AGAACAAAAAGCACTAGTTCCAGAAGCGGCTTTGAGATGATTTGGGATCCGAATGGGTGG | 1140 |
| <b>N1 245467 Method N</b> | 1081 | AGAACAAAAAGCACTAGTTCCAGAAGCGGCTTTGAGATGATTTGGGATCCGAATGGGTGG | 1140 |

|                           |      |                                                              |      |
|---------------------------|------|--------------------------------------------------------------|------|
| <b>N1 245467 MiSeq</b>    | 1141 | ACTGAGACGGACAGTAGTTTCTCAGTGAAGCAAGACATTGTAGAAATAACTGACTGGTCA | 1200 |
| <b>N1 245467 Method A</b> | 1141 | ACTGAGACGGACAGTAGTTTCTCAGTGAAGCAAGACATTGTAGAAATAACTGACTGGTCA | 1200 |
| <b>N1 245467 Method S</b> | 1141 | ACTGAGACGGACAGTAGTTTCTCAGTGAAGCAAGACATTGTAGAAATAACTGACTGGTCA | 1200 |
| <b>N1 245467 Method E</b> | 1141 | ACTGAGACGGACAGTAGTTTCTCAGTGAAGCAAGACATTGTAGAAATAACTGACTGGTCA | 1200 |
| <b>N1 245467 Method K</b> | 1141 | ACTGAGACGGACAGTAGTTTCTCAGTGAAGCAAGACATTGTAGAAATAACTGACTGGTCA | 1200 |
| <b>N1 245467 Method N</b> | 1141 | ACTGAGACGGACAGTAGTTTCTCAGTGAAGCAAGACATTGTAGAAATAACTGACTGGTCA | 1200 |

|                           |      |                                                              |      |
|---------------------------|------|--------------------------------------------------------------|------|
| <b>N1 245467 MiSeq</b>    | 1201 | GGATATAGTGGGAGTTTTGTCCAGCATCCAGAACTGACAGGATTAGATTGCATGAGGCCT | 1260 |
| <b>N1 245467 Method A</b> | 1201 | GGATATAGTGGGAGTTTTGTCCAGCATCCAGAACTGACAGGATTAGATTGCATGAGGCCT | 1260 |
| <b>N1 245467 Method S</b> | 1201 | GGATATAGTGGGAGTTTTGTCCAGCATCCAGAACTGACAGGATTAGATTGCATGAGGCCT | 1260 |
| <b>N1 245467 Method E</b> | 1201 | GGATATAGTGGGAGTTTTGTCCAGCATCCAGAACTGACAGGATTAGATTGCATGAGGCCT | 1260 |
| <b>N1 245467 Method K</b> | 1201 | GGATATAGTGGGAGTTTTGTCCAGCATCCAGAACTGACAGGATTAGATTGCATGAGGCCT | 1260 |
| <b>N1 245467 Method N</b> | 1201 | GGATATAGTGGGAGTTTTGTCCAGCATCCAGAACTGACAGGATTAGATTGCATGAGGCCT | 1260 |

|                           |      |                                                              |      |
|---------------------------|------|--------------------------------------------------------------|------|
| <b>N1 245467 MiSeq</b>    | 1261 | TGTTTCTGGGTTGAGCTAATTAGAGGGAGGCCCAAAGAGAACACAATTTGGACTAGCGGG | 1320 |
| <b>N1 245467 Method A</b> | 1261 | TGTTTCTGGGTTGAGCTAATTAGAGGGAGGCCCAAAGAGAACACAATTTGGACTAGCGGG | 1320 |
| <b>N1 245467 Method S</b> | 1261 | TGTTTCTGGGTTGAGCTAATTAGAGGGAGGCCCAAAGAGAACACAATTTGGACTAGCGGG | 1320 |
| <b>N1 245467 Method E</b> | 1261 | TGTTTCTGGGTTGAGCTAATTAGAGGGAGGCCCAAAGAGAACACAATTTGGACTAGCGGG | 1320 |
| <b>N1 245467 Method K</b> | 1261 | TGTTTCTGGGTTGAGCTAATTAGAGGGAGGCCCAAAGAGAACACAATTTGGACTAGCGGG | 1320 |
| <b>N1 245467 Method N</b> | 1261 | TGTTTCTGGGTTGAGCTAATTAGAGGGAGGCCCAAAGAGAACACAATTTGGACTAGCGGG | 1320 |

|                           |      |                                                            |      |
|---------------------------|------|------------------------------------------------------------|------|
| <b>N1 245467 MiSeq</b>    | 1321 | AGCAGCATATCCTTTTGTGGTGTAATAGTGACACTGTGGGTGGTCTTGGCCAGACGGT | 1380 |
| <b>N1 245467 Method A</b> | 1321 | AGCAGCATATCCTTTTGTGGTGTAATAGTGACACTGTGGGTGGTCTTGGCCAGACGGT | 1380 |
| <b>N1 245467 Method S</b> | 1321 | AGCAGCATATCCTTTTGTGGTGTAATAGTGACACTGTGGGTGGTCTTGGCCAGACGGT | 1380 |
| <b>N1 245467 Method E</b> | 1321 | AGCAGCATATCCTTTTGTGGTGTAATAGTGACACTGTGGGTGGTCTTGGCCAGACGGT | 1380 |
| <b>N1 245467 Method K</b> | 1321 | AGCAGCATATCCTTTTGTGGTGTAATAGTGACACTGTGGGTGGTCTTGGCCAGACGGT | 1380 |
| <b>N1 245467 Method N</b> | 1321 | AGCAGCATATCCTTTTGTGGTGTAATAGTGACACTGTGGGTGGTCTTGGCCAGACGGT | 1380 |

|                           |      |                                |      |
|---------------------------|------|--------------------------------|------|
| <b>N1 245467 MiSeq</b>    | 1381 | GCTGAGTTGCCATTCAACCATGACAAGTAG | 1410 |
| <b>N1 245467 Method A</b> | 1381 | GCTGAGTTGCCATTCAACCATGACAAGTAG | 1410 |
| <b>N1 245467 Method S</b> | 1381 | GCTGAGTTGCCATTCAACCATGACAAGTAG | 1410 |
| <b>N1 245467 Method E</b> | 1381 | GCTGAGTTGCCATTCAACCATGACAAGTAG | 1410 |
| <b>N1 245467 Method K</b> | 1381 | GCTGAGTTGCCATTCAACCATGACAAGTAG | 1410 |
| <b>N1 245467 Method N</b> | 1381 | GCTGAGTTGCCATTCAACCATGACAAGTAG | 1410 |
