# Supplementary material for: An Evaluation of Avian Influenza Virus Whole Genome Sequencing Approaches Using Nanopore Technology
Source: Preprints.org preprint supplement (doi:10.20944/preprints202301.0480.v1), 2023-01-26
Supplement: Supplementary file 30 [file supplementary]

## Formatted Alignments

|                           |   |                                                              |    |
|---------------------------|---|--------------------------------------------------------------|----|
| <b>PA 246038 MiSeq</b>    | 1 | ATGGAAGACTTTGTGCGACAATGCTTCAATCCAATGATTGTCGAGCTTGCGGAAAAAGCA | 60 |
| <b>PA 246038 Method A</b> | 1 | ATGGAAGACTTTGTGCGACAATGCTTCAATCCAATGATTGTCGAGCTTGCGGAAAAAGCA | 60 |
| <b>PA 246038 Method S</b> | 1 | ATGGAAGACTTTGTGCGACAATGCTTCAATCCAATGATTGTCGAGCTTGCGGAAAAAGCA | 60 |
| <b>PA 246038 Method E</b> | 1 | ATGGAAGACTTTGTGCGACAATGCTTCAATCCAATGATTGTCGAGCTTGCGGAAAAAGCA | 60 |
| <b>PA 246038 Method K</b> | 1 | ATGGAAGACTTTGTGCGACAATGCTTCAATCCAATGATTGTCGAGCTTGCGGAAAAAGCA | 60 |
| <b>PA 246038 Method N</b> | 1 | ATGGAAGACTTTGTGCGACAATGCTTCAATCCAATGATTGTCGAGCTTGCGGAAAAAGCA | 60 |

|                           |    |                                                              |     |
|---------------------------|----|--------------------------------------------------------------|-----|
| <b>PA 246038 MiSeq</b>    | 61 | ATGAAAGAATATGGGGAAGATCCGAAAATCGAGACAAACAAATTTGCCGCAATATGCACA | 120 |
| <b>PA 246038 Method A</b> | 61 | ATGAAAGAATATGGGGAAGATCCGAAAATCGAGACAAACAAATTTGCCGCAATATGCACA | 120 |
| <b>PA 246038 Method S</b> | 61 | ATGAAAGAATATGGGGAAGATCCGAAAATCGAGACAAACAAATTTGCCGCAATATGCACA | 120 |
| <b>PA 246038 Method E</b> | 61 | ATGAAAGAATATGGGGAAGATCCGAAAATCGAGACAAACAAATTTGCCGCAATATGCACA | 120 |
| <b>PA 246038 Method K</b> | 61 | ATGAAAGAATATGGGGAAGATCCGAAAATCGAGACAAACAAATTTGCCGCAATATGCACA | 120 |
| <b>PA 246038 Method N</b> | 61 | ATGAAAGAATATGGGGAAGATCCGAAAATCGAGACAAACAAATTTGCCGCAATATGCACA | 120 |

|                           |     |                                                              |     |
|---------------------------|-----|--------------------------------------------------------------|-----|
| <b>PA 246038 MiSeq</b>    | 121 | CACCTAGAAGTCTGTTTCATGTATTCGGATTTCCATTTTATTGATGAACGAGGCGAATCA | 180 |
| <b>PA 246038 Method A</b> | 121 | CACCTAGAAGTCTGTTTCATGTATTCGGATTTCCATTTTATTGATGAACGAGGCGAATCA | 180 |
| <b>PA 246038 Method S</b> | 121 | CACCTAGAAGTCTGTTTCATGTATTCGGATTTCCATTTTATTGATGAACGAGGCGAATCA | 180 |
| <b>PA 246038 Method E</b> | 121 | CACCTAGAAGTCTGTTTCATGTATTCGGATTTCCATTTTATTGATGAACGAGGCGAATCA | 180 |
| <b>PA 246038 Method K</b> | 121 | CACCTAGAAGTCTGTTTCATGTATTCGGATTTCCATTTTATTGATGAACGAGGCGAATCA | 180 |
| <b>PA 246038 Method N</b> | 121 | CACCTAGAAGTCTGTTTCATGTATTCGGATTTCCATTTTATTGATGAACGAGGCGAATCA | 180 |

|                           |     |                                                              |     |
|---------------------------|-----|--------------------------------------------------------------|-----|
| <b>PA 246038 MiSeq</b>    | 181 | ATGATTGTAGAATCTGGGGATCCAAATGCATTATTGAAACACCGATTTGAGATAATCGAA | 240 |
| <b>PA 246038 Method A</b> | 181 | ATGATTGTAGAATCTGGGGATCCAAATGCATTATTGAAACACCGATTTGAGATAATCGAA | 240 |
| <b>PA 246038 Method S</b> | 181 | ATGATTGTAGAATCTGGGGATCCAAATGCATTATTGAAACACCGATTTGAGATAATCGAA | 240 |
| <b>PA 246038 Method E</b> | 181 | ATGATTGTAGAATCTGGGGATCCAAATGCATTATTGAAACACCGATTTGAGATAATCGAA | 240 |
| <b>PA 246038 Method K</b> | 181 | ATGATTGTAGAATCTGGGGATCCAAATGCATTATTGAAACACCGATTTGAGATAATCGAA | 240 |
| <b>PA 246038 Method N</b> | 181 | ATGATTGTAGAATCTGGGGATCCAAATGCATTATTGAAACACCGATTTGAGATAATCGAA | 240 |

|                           |     |                                                               |     |
|---------------------------|-----|---------------------------------------------------------------|-----|
| <b>PA 246038 MiSeq</b>    | 241 | GGGAGAGACCGAGCAATGGCCTGGACAGTGGTGAATAGTATCTGCAACACCACAGGGGGTC | 300 |
| <b>PA 246038 Method A</b> | 241 | GGGAGAGACCGAGCAATGGCCTGGACAGTGGTGAATAGTATCTGCAACACCACAGGGGGTC | 300 |
| <b>PA 246038 Method S</b> | 241 | GGGAGAGACCGAGCAATGGCCTGGACAGTGGTGAATAGTATCTGCAACACCACAGGGGGTC | 300 |
| <b>PA 246038 Method E</b> | 241 | GGGAGAGACCGAGCAATGGCCTGGACAGTGGTGAATAGTATCTGCAACACCACAGGGGGTC | 300 |
| <b>PA 246038 Method K</b> | 241 | GGGAGAGACCGAGCAATGGCCTGGACAGTGGTGAATAGTATCTGCAACACCACAGGGGGTC | 300 |
| <b>PA 246038 Method N</b> | 241 | GGGAGAGACCGAGCAATGGCCTGGACAGTGGTGAATAGTATCTGCAACACCACAGGGGGTC | 300 |

|                           |     |                                                                |     |
|---------------------------|-----|----------------------------------------------------------------|-----|
| <b>PA 246038 MiSeq</b>    | 301 | GAAAAGCCCCAAATTCCTCCCTGATTTGTATGACTACAAAGAGAACCGATTTCATTGAAATT | 360 |
| <b>PA 246038 Method A</b> | 301 | GAAAAGCCCCAAATTCCTCCCTGATTTGTATGACTACAAAGAGAACCGATTTCATTGAAATT | 360 |
| <b>PA 246038 Method S</b> | 301 | GAAAAGCCCCAAATTCCTCCCTGATTTGTATGACTACAAAGAGAACCGATTTCATTGAAATT | 360 |
| <b>PA 246038 Method E</b> | 301 | GAAAAGCCCCAAATTCCTCCCTGATTTGTATGACTACAAAGAGAACCGATTTCATTGAAATT | 360 |
| <b>PA 246038 Method K</b> | 301 | GAAAAGCCCCAAATTCCTCCCTGATTTGTATGACTACAAAGAGAACCGATTTCATTGAAATT | 360 |
| <b>PA 246038 Method N</b> | 301 | GAAAAGCCCCAAATTCCTCCCTGATTTGTATGACTACAAAGAGAACCGATTTCATTGAAATT | 360 |

|                           |     |                                                               |     |
|---------------------------|-----|---------------------------------------------------------------|-----|
| <b>PA 246038 MiSeq</b>    | 361 | GGAGTAACGCGAAGGGAAGTTCACATATACTATTTAGAAAAAGCCAACAAGATAAAAATCA | 420 |
| <b>PA 246038 Method A</b> | 361 | GGAGTAACGCGAAGGGAAGTTCACATATACTATTTAGAAAAAGCCAACAAGATAAAAATCA | 420 |
| <b>PA 246038 Method S</b> | 361 | GGAGTAACGCGAAGGGAAGTTCACATATACTATTTAGAAAAAGCCAACAAGATAAAAATCA | 420 |
| <b>PA 246038 Method E</b> | 361 | GGAGTAACGCGAAGGGAAGTTCACATATACTATTTAGAAAAAGCCAACAAGATAAAAATCA | 420 |
| <b>PA 246038 Method K</b> | 361 | GGAGTAACGCGAAGGGAAGTTCACATATACTATTTAGAAAAAGCCAACAAGATAAAAATCA | 420 |
| <b>PA 246038 Method N</b> | 361 | GGAGTAACGCGAAGGGAAGTTCACATATACTATTTAGAAAAAGCCAACAAGATAAAAATCA | 420 |

|                           |     |                                                              |     |
|---------------------------|-----|--------------------------------------------------------------|-----|
| <b>PA 246038 MiSeq</b>    | 421 | GAGAAAACACATATTCACATATTCTCATTCACTGGAGAGGAAATGGCCACCAAGGCGGAC | 480 |
| <b>PA 246038 Method A</b> | 421 | GAGAAAACACATATTCACATATTCTCATTCACTGGAGAGGAAATGGCCACCAAGGCGGAC | 480 |
| <b>PA 246038 Method S</b> | 421 | GAGAAAACACATATTCACATATTCTCATTCACTGGAGAGGAAATGGCCACCAAGGCGGAC | 480 |
| <b>PA 246038 Method E</b> | 421 | GAGAAAACACATATTCACATATTCTCATTCACTGGAGAGGAAATGGCCACCAAGGCGGAC | 480 |
| <b>PA 246038 Method K</b> | 421 | GAGAAAACACATATTCACATATTCTCATTCACTGGAGAGGAAATGGCCACCAAGGCGGAC | 480 |
| <b>PA 246038 Method N</b> | 421 | GAGAAAACACATATTCACATATTCTCATTCACTGGAGAGGAAATGGCCACCAAGGCGGAC | 480 |

|                           |     |                                                               |     |
|---------------------------|-----|---------------------------------------------------------------|-----|
| <b>PA 246038 MiSeq</b>    | 481 | TACACCCTTGATGAAGAGAGCAGAGCAAGAATAAAAAACCAGACTGTTCACTATAAGACAA | 540 |
| <b>PA 246038 Method A</b> | 481 | TACACCCTTGATGAAGAGAGCAGAGCAAGAATAAAAAACCAGACTGTTCACTATAAGACAA | 540 |
| <b>PA 246038 Method S</b> | 481 | TACACCCTTGATGAAGAGAGCAGAGCAAGAATAAAAAACCAGACTGTTCACTATAAGACAA | 540 |
| <b>PA 246038 Method E</b> | 481 | TACACCCTTGATGAAGAGAGCAGAGCAAGAATAAAAAACCAGACTGTTCACTATAAGACAA | 540 |
| <b>PA 246038 Method K</b> | 481 | TACACCCTTGATGAAGAGAGCAGAGCAAGAATAAAAAACCAGACTGTTCACTATAAGACAA | 540 |
| <b>PA 246038 Method N</b> | 481 | TACACCCTTGATGAAGAGAGCAGAGCAAGAATAAAAAACCAGACTGTTCACTATAAGACAA | 540 |

|                           |     |                                                               |     |
|---------------------------|-----|---------------------------------------------------------------|-----|
| <b>PA 246038 MiSeq</b>    | 541 | GAAATGGCCAGTAGAGGTCTATGGGATTCCTTTTCGTCAGTCCGAGAGAGGCGAAGAGACA | 600 |
| <b>PA 246038 Method A</b> | 541 | GAAATGGCCAGTAGAGGTCTATGGGATTCCTTTTCGTCAGTCCGAGAGAGGCGAAGAGACA | 600 |
| <b>PA 246038 Method S</b> | 541 | GAAATGGCCAGTAGAGGTCTATGGGATTCCTTTTCGTCAGTCCGAGAGAGGCGAAGAGACA | 600 |
| <b>PA 246038 Method E</b> | 541 | GAAATGGCCAGTAGAGGTCTATGGGATTCCTTTTCGTCAGTCCGAGAGAGGCGAAGAGACA | 600 |
| <b>PA 246038 Method K</b> | 541 | GAAATGGCCAGTAGAGGTCTATGGGATTCCTTTTCGTCAGTCCGAGAGAGGCGAAGAGACA | 600 |
| <b>PA 246038 Method N</b> | 541 | GAAATGGCCAGTAGAGGTCTATGGGATTCCTTTTCGTCAGTCCGAGAGAGGCGAAGAGACA | 600 |

|                           |     |                                                              |     |
|---------------------------|-----|--------------------------------------------------------------|-----|
| <b>PA 246038 MiSeq</b>    | 601 | ATTGAAGAAAGATTTGAAATCACAGGAACCATGCGCAGGCTTGCCGACCAAAGTCTTCCA | 660 |
| <b>PA 246038 Method A</b> | 601 | ATTGAAGAAAGATTTGAAATCACAGGAACCATGCGCAGGCTTGCCGACCAAAGTCTTCCA | 660 |
| <b>PA 246038 Method S</b> | 601 | ATTGAAGAAAGATTTGAAATCACAGGAACCATGCGCAGGCTTGCCGACCAAAGTCTTCCA | 660 |
| <b>PA 246038 Method E</b> | 601 | ATTGAAGAAAGATTTGAAATCACAGGAACCATGCGCAGGCTTGCCGACCAAAGTCTTCCA | 660 |
| <b>PA 246038 Method K</b> | 601 | ATTGAAGAAAGATTTGAAATCACAGGAACCATGCGCAGGCTTGCCGACCAAAGTCTTCCA | 660 |
| <b>PA 246038 Method N</b> | 601 | ATTGAAGAAAGATTTGAAATCACAGGAACCATGCGCAGGCTTGCCGACCAAAGTCTTCCA | 660 |

|                           |     |                                                                 |     |
|---------------------------|-----|-----------------------------------------------------------------|-----|
| <b>PA 246038 MiSeq</b>    | 661 | CCGAACCTTCTCCAGCCTTGAAAACCTTTAGAGCCTATGTGGATGGATTTCGAACCGAACGGC | 720 |
| <b>PA 246038 Method A</b> | 661 | CCGAACCTTCTCCAGCCTTGAAAACCTTTAGAGCCTATGTGGATGGATTTCGAACCGAACGGC | 720 |
| <b>PA 246038 Method S</b> | 661 | CCGAACCTTCTCCAGCCTTGAAAACCTTTAGAGCCTATGTGGATGGATTTCGAACCGAACGGC | 720 |
| <b>PA 246038 Method E</b> | 661 | CCGAACCTTCTCCAGCCTTGAAAACCTTTAGAGCCTATGTGGATGGATTTCGAACCGAACGGC | 720 |
| <b>PA 246038 Method K</b> | 661 | CCGAACCTTCTCCAGCCTTGAAAACCTTTAGAGCCTATGTGGATGGATTTCGAACCGAACGGC | 720 |
| <b>PA 246038 Method N</b> | 661 | CCGAACCTTCTCCAGCCTTGAAAACCTTTAGAGCCTATGTGGATGGATTTCGAACCGAACGGC | 720 |

|                    |     |                                                               |     |
|--------------------|-----|---------------------------------------------------------------|-----|
| PA 246038 MiSeq    | 721 | TGCATTGAGGGCAAACCTTTCTCAAATGTCAAAAGAAGTGAACGCCAGAATTGAGCCATTT | 780 |
| PA 246038 Method A | 721 | TGCATTGAGGGCAAACCTTTCTCAAATGTCAAAAGAAGTGAACGCCAGAATTGAGCCATTT | 780 |
| PA 246038 Method S | 721 | TGCATTGAGGGCAAACCTTTCTCAAATGTCAAAAGAAGTGAACGCCAGAATTGAGCCATTT | 780 |
| PA 246038 Method E | 721 | TGCATTGAGGGCAAACCTTTCTCAAATGTCAAAAGAAGTGAACGCCAGAATTGAGCCATTT | 780 |
| PA 246038 Method K | 721 | TGCATTGAGGGCAAACCTTTCTCAAATGTCAAAAGAAGTGAACGCCAGAATTGAGCCATTT | 780 |
| PA 246038 Method N | 721 | TGCATTGAGGGCAAACCTTTCTCAAATGTCAAAAGAAGTGAACGCCAGAATTGAGCCATTT | 780 |

|                    |     |                                                               |     |
|--------------------|-----|---------------------------------------------------------------|-----|
| PA 246038 MiSeq    | 781 | CTGAAGACAACACCACGCCCTCTCAGATTACCTGATGGGCCTCCCTGTTCTCAGCGGTCTG | 840 |
| PA 246038 Method A | 781 | CTGAAGACAACACCACGCCCTCTCAGATTACCTGATGGGCCTCCCTGTTCTCAGCGGTCTG | 840 |
| PA 246038 Method S | 781 | CTGAAGACAACACCACGCCCTCTCAGATTACCTGATGGGCCTCCCTGTTCTCAGCGGTCTG | 840 |
| PA 246038 Method E | 781 | CTGAAGACAACACCACGCCCTCTCAGATTACCTGATGGGCCTCCCTGTTCTCAGCGGTCTG | 840 |
| PA 246038 Method K | 781 | CTGAAGACAACACCACGCCCTCTCAGATTACCTGATGGGCCTCCCTGTTCTCAGCGGTCTG | 840 |
| PA 246038 Method N | 781 | CTGAAGACAACACCACGCCCTCTCAGATTACCTGATGGGCCTCCCTGTTCTCAGCGGTCTG | 840 |

|                    |     |                                                               |     |
|--------------------|-----|---------------------------------------------------------------|-----|
| PA 246038 MiSeq    | 841 | AAGTTCTTGCTGATGGATGCCCTTAAGTTGAGCATCGAAGACCCTAGTCATGAGGGGGGAG | 900 |
| PA 246038 Method A | 841 | AAGTTCTTGCTGATGGATGCCCTTAAGTTGAGCATCGAAGACCCTAGTCATGAGGGGGGAG | 900 |
| PA 246038 Method S | 841 | AAGTTCTTGCTGATGGATGCCCTTAAGTTGAGCATCGAAGACCCTAGTCATGAGGGGGGAG | 900 |
| PA 246038 Method E | 841 | AAGTTCTTGCTGATGGATGCCCTTAAGTTGAGCATCGAAGACCCTAGTCATGAGGGGGGAG | 900 |
| PA 246038 Method K | 841 | AAGTTCTTGCTGATGGATGCCCTTAAGTTGAGCATCGAAGACCCTAGTCATGAGGGGGGAG | 900 |
| PA 246038 Method N | 841 | AAGTTCTTGCTGATGGATGCCCTTAAGTTGAGCATCGAAGACCCTAGTCATGAGGGGGGAG | 900 |

|                    |     |                                                               |     |
|--------------------|-----|---------------------------------------------------------------|-----|
| PA 246038 MiSeq    | 901 | GGCATACCGCTGTATGATGCAATCAAATGCATGAAGACATTTTTTTGGCTGGAAAGAGCCC | 960 |
| PA 246038 Method A | 901 | GGCATACCGCTGTATGATGCAATCAAATGCATGAAGACATTTTTTTGGCTGGAAAGAGCCC | 960 |
| PA 246038 Method S | 901 | GGCATACCGCTGTATGATGCAATCAAATGCATGAAGACATTTTTTTGGCTGGAAAGAGCCC | 960 |
| PA 246038 Method E | 901 | GGCATACCGCTGTATGATGCAATCAAATGCATGAAGACATTTTTTTGGCTGGAAAGAGCCC | 960 |
| PA 246038 Method K | 901 | GGCATACCGCTGTATGATGCAATCAAATGCATGAAGACATTTTTTTGGCTGGAAAGAGCCC | 960 |
| PA 246038 Method N | 901 | GGCATACCGCTGTATGATGCAATCAAATGCATGAAGACATTTTTTTGGCTGGAAAGAGCCC | 960 |

|                           |     |                                                               |      |
|---------------------------|-----|---------------------------------------------------------------|------|
| <b>PA 246038 MiSeq</b>    | 961 | AACATCGTAAAGCCGCATGAGAAAGGCATAAACCCCTAATTACCTCCTGGCTTGGAAGCAG | 1020 |
| <b>PA 246038 Method A</b> | 961 | AACATCGTAAAGCCGCATGAGAAAGGCATAAACCCCTAATTACCTCCTGGCTTGGAAGCAG | 1020 |
| <b>PA 246038 Method S</b> | 961 | AACATCGTAAAGCCGCATGAGAAAGGCATAAACCCCTAATTACCTCCTGGCTTGGAAGCAG | 1020 |
| <b>PA 246038 Method E</b> | 961 | AACATCGTAAAGCCGCATGAGAAAGGCATAAACCCCTAATTACCTCCTGGCTTGGAAGCAG | 1020 |
| <b>PA 246038 Method K</b> | 961 | AACATCGTAAAGCCGCATGAGAAAGGCATAAACCCCTAATTACCTCCTGGCTTGGAAGCAG | 1020 |
| <b>PA 246038 Method N</b> | 961 | AACATCGTAAAGCCGCATGAGAAAGGCATAAACCCCTAATTACCTCCTGGCTTGGAAGCAG | 1020 |

|                           |      |                                                              |      |
|---------------------------|------|--------------------------------------------------------------|------|
| <b>PA 246038 MiSeq</b>    | 1021 | GTGCTGGCAGAACTTCAAGACATTGAAAATGAGGAGAAAATTCCAAAAACAAAGAACATG | 1080 |
| <b>PA 246038 Method A</b> | 1021 | GTGCTGGCAGAACTTCAAGACATTGAAAATGAGGAGAAAATTCCAAAAACAAAGAACATG | 1080 |
| <b>PA 246038 Method S</b> | 1021 | GTGCTGGCAGAACTTCAAGACATTGAAAATGAGGAGAAAATTCCAAAAACAAAGAACATG | 1080 |
| <b>PA 246038 Method E</b> | 1021 | GTGCTGGCAGAACTTCAAGACATTGAAAATGAGGAGAAAATTCCAAAAACAAAGAACATG | 1080 |
| <b>PA 246038 Method K</b> | 1021 | GTGCTGGCAGAACTTCAAGACATTGAAAATGAGGAGAAAATTCCAAAAACAAAGAACATG | 1080 |
| <b>PA 246038 Method N</b> | 1021 | GTGCTGGCAGAACTTCAAGACATTGAAAATGAGGAGAAAATTCCAAAAACAAAGAACATG | 1080 |

|                           |      |                                                              |      |
|---------------------------|------|--------------------------------------------------------------|------|
| <b>PA 246038 MiSeq</b>    | 1081 | AAGAAAACAAGCCAATTGAAGTGGGCACTTGGTGAGAACATGGCTCCAGAAAAAGTGGAC | 1140 |
| <b>PA 246038 Method A</b> | 1081 | AAGAAAACAAGCCAATTGAAGTGGGCACTTGGTGAGAACATGGCTCCAGAAAAAGTGGAC | 1140 |
| <b>PA 246038 Method S</b> | 1081 | AAGAAAACAAGCCAATTGAAGTGGGCACTTGGTGAGAACATGGCTCCAGAAAAAGTGGAC | 1140 |
| <b>PA 246038 Method E</b> | 1081 | AAGAAAACAAGCCAATTGAAGTGGGCACTTGGTGAGAACATGGCTCCAGAAAAAGTGGAC | 1140 |
| <b>PA 246038 Method K</b> | 1081 | AAGAAAACAAGCCAATTGAAGTGGGCACTTGGTGAGAACATGGCTCCAGAAAAAGTGGAC | 1140 |
| <b>PA 246038 Method N</b> | 1081 | AAGAAAACAAGCCAATTGAAGTGGGCACTTGGTGAGAACATGGCTCCAGAAAAAGTGGAC | 1140 |

|                           |      |                                                              |      |
|---------------------------|------|--------------------------------------------------------------|------|
| <b>PA 246038 MiSeq</b>    | 1141 | TTTGAGGACTGCAAAGATGTTAGCGATCTAAGACAGTACGACAGTGACGAACCAGAGTCT | 1200 |
| <b>PA 246038 Method A</b> | 1141 | TTTGAGGACTGCAAAGATGTTAGCGATCTAAGACAGTACGACAGTGACGAACCAGAGTCT | 1200 |
| <b>PA 246038 Method S</b> | 1141 | TTTGAGGACTGCAAAGATGTTAGCGATCTAAGACAGTACGACAGTGACGAACCAGAGTCT | 1200 |
| <b>PA 246038 Method E</b> | 1141 | TTTGAGGACTGCAAAGATGTTAGCGATCTAAGACAGTACGACAGTGACGAACCAGAGTCT | 1200 |
| <b>PA 246038 Method K</b> | 1141 | TTTGAGGACTGCAAAGATGTTAGCGATCTAAGACAGTACGACAGTGACGAACCAGAGTCT | 1200 |
| <b>PA 246038 Method N</b> | 1141 | TTTGAGGACTGCAAAGATGTTAGCGATCTAAGACAGTACGACAGTGACGAACCAGAGTCT | 1200 |

|                           |      |                                                                |      |
|---------------------------|------|----------------------------------------------------------------|------|
| <b>PA 246038 MiSeq</b>    | 1201 | AGATCACTAGCAAGCTGGATTTCAGAGTGAATTCAACAAGGCATGCGAACTGACAGATTTCG | 1260 |
| <b>PA 246038 Method A</b> | 1201 | AGATCACTAGCAAGCTGGATTTCAGAGTGAATTCAACAAGGCATGCGAACTGACAGATTTCG | 1260 |
| <b>PA 246038 Method S</b> | 1201 | AGATCACTAGCAAGCTGGATTTCAGAGTGAATTCAACAAGGCATGCGAACTGACAGATTTCG | 1260 |
| <b>PA 246038 Method E</b> | 1201 | AGATCACTAGCAAGCTGGATTTCAGAGTGAATTCAACAAGGCATGCGAACTGACAGATTTCG | 1260 |
| <b>PA 246038 Method K</b> | 1201 | AGATCACTAGCAAGCTGGATTTCAGAGTGAATTCAACAAGGCATGCGAACTGACAGATTTCG | 1260 |
| <b>PA 246038 Method N</b> | 1201 | AGATCACTAGCAAGCTGGATTTCAGAGTGAATTCAACAAGGCATGCGAACTGACAGATTTCG | 1260 |

|                           |      |                                                              |      |
|---------------------------|------|--------------------------------------------------------------|------|
| <b>PA 246038 MiSeq</b>    | 1261 | AGTTGGATTGAACTTGATGAGATAGGGGAAGACGTTGCTCCAATCGAACACATTGCGAGT | 1320 |
| <b>PA 246038 Method A</b> | 1261 | AGTTGGATTGAACTTGATGAGATAGGGGAAGACGTTGCTCCAATCGAACACATTGCGAGT | 1320 |
| <b>PA 246038 Method S</b> | 1261 | AGTTGGATTGAACTTGATGAGATAGGGGAAGACGTTGCTCCAATCGAACACATTGCGAGT | 1320 |
| <b>PA 246038 Method E</b> | 1261 | AGTTGGATTGAACTTGATGAGATAGGGGAAGACGTTGCTCCAATCGAACACATTGCGAGT | 1320 |
| <b>PA 246038 Method K</b> | 1261 | AGTTGGATTGAACTTGATGAGATAGGGGAAGACGTTGCTCCAATCGAACACATTGCGAGT | 1320 |
| <b>PA 246038 Method N</b> | 1261 | AGTTGGATTGAACTTGATGAGATAGGGGAAGACGTTGCTCCAATCGAACACATTGCGAGT | 1320 |

|                           |      |                                                               |      |
|---------------------------|------|---------------------------------------------------------------|------|
| <b>PA 246038 MiSeq</b>    | 1321 | GTGAGGAGGAACTATTTTCACAGCAGAGGTATCCCATTGCAGGGCCACTGAATACATAATG | 1380 |
| <b>PA 246038 Method A</b> | 1321 | GTGAGGAGGAACTATTTTCACAGCAGAGGTATCCCATTGCAGGGCCACTGAATACATAATG | 1380 |
| <b>PA 246038 Method S</b> | 1321 | GTGAGGAGGAACTATTTTCACAGCAGAGGTATCCCATTGCAGGGCCACTGAATACATAATG | 1380 |
| <b>PA 246038 Method E</b> | 1321 | GTGAGGAGGAACTATTTTCACAGCAGAGGTATCCCATTGCAGGGCCACTGAATACATAATG | 1380 |
| <b>PA 246038 Method K</b> | 1321 | GTGAGGAGGAACTATTTTCACAGCAGAGGTATCCCATTGCAGGGCCACTGAATACATAATG | 1380 |
| <b>PA 246038 Method N</b> | 1321 | GTGAGGAGGAACTATTTTCACAGCAGAGGTATCCCATTGCAGGGCCACTGAATACATAATG | 1380 |

|                           |      |                                                                |      |
|---------------------------|------|----------------------------------------------------------------|------|
| <b>PA 246038 MiSeq</b>    | 1381 | AAGGGAGTATACATAAAACACAGCCCTATTGAATGCATCCTGTGCAGCCATGGATGATTTTC | 1440 |
| <b>PA 246038 Method A</b> | 1381 | AAGGGAGTATACATAAAACACAGCCCTATTGAATGCATCCTGTGCAGCCATGGATGATTTTC | 1440 |
| <b>PA 246038 Method S</b> | 1381 | AAGGGAGTATACATAAAACACAGCCCTATTGAATGCATCCTGTGCAGCCATGGATGATTTTC | 1440 |
| <b>PA 246038 Method E</b> | 1381 | AAGGGAGTATACATAAAACACAGCCCTATTGAATGCATCCTGTGCAGCCATGGATGATTTTC | 1440 |
| <b>PA 246038 Method K</b> | 1381 | AAGGGAGTATACATAAAACACAGCCCTATTGAATGCATCCTGTGCAGCCATGGATGATTTTC | 1440 |
| <b>PA 246038 Method N</b> | 1381 | AAGGGAGTATACATAAAACACAGCCCTATTGAATGCATCCTGTGCAGCCATGGATGATTTTC | 1440 |

|                           |      |                                                              |      |
|---------------------------|------|--------------------------------------------------------------|------|
| <b>PA 246038 MiSeq</b>    | 1441 | CAACTGATTCCAATGATAAGTAAGTGCAGAACTAAAGAAGGAAGACGGAAGACAAATCTG | 1500 |
| <b>PA 246038 Method A</b> | 1441 | CAACTGATTCCAATGATAAGTAAGTGCAGAACTAAAGAAGGAAGACGGAAGACAAATCTG | 1500 |
| <b>PA 246038 Method S</b> | 1441 | CAACTGATTCCAATGATAAGTAAGTGCAGAACTAAAGAAGGAAGACGGAAGACAAATCTG | 1500 |
| <b>PA 246038 Method E</b> | 1441 | CAACTGATTCCAATGATAAGTAAGTGCAGAACTAAAGAAGGAAGACGGAAGACAAATCTG | 1500 |
| <b>PA 246038 Method K</b> | 1441 | CAACTGATTCCAATGATAAGTAAGTGCAGAACTAAAGAAGGAAGACGGAAGACAAATCTG | 1500 |
| <b>PA 246038 Method N</b> | 1441 | CAACTGATTCCAATGATAAGTAAGTGCAGAACTAAAGAAGGAAGACGGAAGACAAATCTG | 1500 |

|                           |      |                                                                |      |
|---------------------------|------|----------------------------------------------------------------|------|
| <b>PA 246038 MiSeq</b>    | 1501 | TATGGATTTCATTATAAAAAGGAAGATCCCATTTGAGGAATGACACCGATGTGGTAAACTTT | 1560 |
| <b>PA 246038 Method A</b> | 1501 | TATGGATTTCATTATAAAAAGGAAGATCCCATTTGAGGAATGACACCGATGTGGTAAACTTT | 1560 |
| <b>PA 246038 Method S</b> | 1501 | TATGGATTTCATTATAAAAAGGAAGATCCCATTTGAGGAATGACACCGATGTGGTAAACTTT | 1560 |
| <b>PA 246038 Method E</b> | 1501 | TATGGATTTCATTATAAAAAGGAAGATCCCATTTGAGGAATGACACCGATGTGGTAAACTTT | 1560 |
| <b>PA 246038 Method K</b> | 1501 | TATGGATTTCATTATAAAAAGGAAGATCCCATTTGAGGAATGACACCGATGTGGTAAACTTT | 1560 |
| <b>PA 246038 Method N</b> | 1501 | TATGGATTTCATTATAAAAAGGAAGATCCCATTTGAGGAATGACACCGATGTGGTAAACTTT | 1560 |

|                           |      |                                                              |      |
|---------------------------|------|--------------------------------------------------------------|------|
| <b>PA 246038 MiSeq</b>    | 1561 | GTGAGCATGGAATTCTCTCTAACTGACCCGAGGCTAGAGCCACACAAATGGGAAAAGTAC | 1620 |
| <b>PA 246038 Method A</b> | 1561 | GTGAGCATGGAATTCTCTCTAACTGACCCGAGGCTAGAGCCACACAAATGGGAAAAGTAC | 1620 |
| <b>PA 246038 Method S</b> | 1561 | GTGAGCATGGAATTCTCTCTAACTGACCCGAGGCTAGAGCCACACAAATGGGAAAAGTAC | 1620 |
| <b>PA 246038 Method E</b> | 1561 | GTGAGCATGGAATTCTCTCTAACTGACCCGAGGCTAGAGCCACACAAATGGGAAAAGTAC | 1620 |
| <b>PA 246038 Method K</b> | 1561 | GTGAGCATGGAATTCTCTCTAACTGACCCGAGGCTAGAGCCACACAAATGGGAAAAGTAC | 1620 |
| <b>PA 246038 Method N</b> | 1561 | GTGAGCATGGAATTCTCTCTAACTGACCCGAGGCTAGAGCCACACAAATGGGAAAAGTAC | 1620 |

|                           |      |                                                             |      |
|---------------------------|------|-------------------------------------------------------------|------|
| <b>PA 246038 MiSeq</b>    | 1621 | TGTGTTCTTGAGATAGGAGACATGCTCCTACGGACTGCAATAGGCCAAGTGTCGAGGCC | 1680 |
| <b>PA 246038 Method A</b> | 1621 | TGTGTTCTTGAGATAGGAGACATGCTCCTACGGACTGCAATAGGCCAAGTGTCGAGGCC | 1680 |
| <b>PA 246038 Method S</b> | 1621 | TGTGTTCTTGAGATAGGAGACATGCTCCTACGGACTGCAATAGGCCAAGTGTCGAGGCC | 1680 |
| <b>PA 246038 Method E</b> | 1621 | TGTGTTCTTGAGATAGGAGACATGCTCCTACGGACTGCAATAGGCCAAGTGTCGAGGCC | 1680 |
| <b>PA 246038 Method K</b> | 1621 | TGTGTTCTTGAGATAGGAGACATGCTCCTACGGACTGCAATAGGCCAAGTGTCGAGGCC | 1680 |
| <b>PA 246038 Method N</b> | 1621 | TGTGTTCTTGAGATAGGAGACATGCTCCTACGGACTGCAATAGGCCAAGTGTCGAGGCC | 1680 |

|                           |      |                                                               |      |
|---------------------------|------|---------------------------------------------------------------|------|
| <b>PA 246038 MiSeq</b>    | 1681 | ATG TTCCTGTATGTGAGAACCAATGGGACTTCCAAGATCAAAATGAAATGGGGCATGGAG | 1740 |
| <b>PA 246038 Method A</b> | 1681 | ATG TTCCTGTATGTGAGAACCAATGGGACTTCCAAGATCAAAATGAAATGGGGCATGGAG | 1740 |
| <b>PA 246038 Method S</b> | 1681 | ATG TTCCTGTATGTGAGAACCAATGGGACTTCCAAGATCAAAATGAAATGGGGCATGGAG | 1740 |
| <b>PA 246038 Method E</b> | 1681 | ATG TTCCTGTATGTGAGAACCAATGGGACTTCCAAGATCAAAATGAAATGGGGCATGGAG | 1740 |
| <b>PA 246038 Method K</b> | 1681 | ATG TTCCTGTATGTGAGAACCAATGGGACTTCCAAGATCAAAATGAAATGGGGCATGGAG | 1740 |
| <b>PA 246038 Method N</b> | 1681 | ATG TTCCTGTATGTGAGAACCAATGGGACTTCCAAGATCAAAATGAAATGGGGCATGGAG | 1740 |

|                           |      |                                                              |      |
|---------------------------|------|--------------------------------------------------------------|------|
| <b>PA 246038 MiSeq</b>    | 1741 | ATGAGGCGATGCCTTCTTCAGTCCCTTCAACAAATTGAGAGCATGATTGAGGCCGAATCT | 1800 |
| <b>PA 246038 Method A</b> | 1741 | ATGAGGCGATGCCTTCTTCAGTCCCTTCAACAAATTGAGAGCATGATTGAGGCCGAATCT | 1800 |
| <b>PA 246038 Method S</b> | 1741 | ATGAGGCGATGCCTTCTTCAGTCCCTTCAACAAATTGAGAGCATGATTGAGGCCGAATCT | 1800 |
| <b>PA 246038 Method E</b> | 1741 | ATGAGGCGATGCCTTCTTCAGTCCCTTCAACAAATTGAGAGCATGATTGAGGCCGAATCT | 1800 |
| <b>PA 246038 Method K</b> | 1741 | ATGAGGCGATGCCTTCTTCAGTCCCTTCAACAAATTGAGAGCATGATTGAGGCCGAATCT | 1800 |
| <b>PA 246038 Method N</b> | 1741 | ATGAGGCGATGCCTTCTTCAGTCCCTTCAACAAATTGAGAGCATGATTGAGGCCGAATCT | 1800 |

|                           |      |                                                              |      |
|---------------------------|------|--------------------------------------------------------------|------|
| <b>PA 246038 MiSeq</b>    | 1801 | TCTGTCAAAGAGAAGGACATGTCCAAGGAATTCTTTGAAAACAAATCAGAAACATGGCCA | 1860 |
| <b>PA 246038 Method A</b> | 1801 | TCTGTCAAAGAGAAGGACATGTCCAAGGAATTCTTTGAAAACAAATCAGAAACATGGCCA | 1860 |
| <b>PA 246038 Method S</b> | 1801 | TCTGTCAAAGAGAAGGACATGTCCAAGGAATTCTTTGAAAACAAATCAGAAACATGGCCA | 1860 |
| <b>PA 246038 Method E</b> | 1801 | TCTGTCAAAGAGAAGGACATGTCCAAGGAATTCTTTGAAAACAAATCAGAAACATGGCCA | 1860 |
| <b>PA 246038 Method K</b> | 1801 | TCTGTCAAAGAGAAGGACATGTCCAAGGAATTCTTTGAAAACAAATCAGAAACATGGCCA | 1860 |
| <b>PA 246038 Method N</b> | 1801 | TCTGTCAAAGAGAAGGACATGTCCAAGGAATTCTTTGAAAACAAATCAGAAACATGGCCA | 1860 |

|                           |      |                                                              |      |
|---------------------------|------|--------------------------------------------------------------|------|
| <b>PA 246038 MiSeq</b>    | 1861 | ATTGGAGAATCACCCAAAGGGGTGGAGGAAGGCTCTATTGGGAAAGTATGCAGAACATTG | 1920 |
| <b>PA 246038 Method A</b> | 1861 | ATTGGAGAATCACCCAAAGGGGTGGAGGAAGGCTCTATTGGGAAAGTATGCAGAACATTG | 1920 |
| <b>PA 246038 Method S</b> | 1861 | ATTGGAGAATCACCCAAAGGGGTGGAGGAAGGCTCTATTGGGAAAGTATGCAGAACATTG | 1920 |
| <b>PA 246038 Method E</b> | 1861 | ATTGGAGAATCACCCAAAGGGGTGGAGGAAGGCTCTATTGGGAAAGTATGCAGAACATTG | 1920 |
| <b>PA 246038 Method K</b> | 1861 | ATTGGAGAATCACCCAAAGGGGTGGAGGAAGGCTCTATTGGGAAAGTATGCAGAACATTG | 1920 |
| <b>PA 246038 Method N</b> | 1861 | ATTGGAGAATCACCCAAAGGGGTGGAGGAAGGCTCTATTGGGAAAGTATGCAGAACATTG | 1920 |



|                           |      |                                                                 |      |
|---------------------------|------|-----------------------------------------------------------------|------|
| <b>PA 246038 MiSeq</b>    | 1921 | CTAGCAAAGTCTGTGTTCAACAGCCTATATGCATCTCCACAACCTCGAGGGGGTTTTTCAGCT | 1980 |
| <b>PA 246038 Method A</b> | 1921 | CTAGCAAAGTCTGTGTTCAACAGCCTATATGCATCTCCACAACCTCGAGGGGGTTTTTCAGCT | 1980 |
| <b>PA 246038 Method S</b> | 1921 | CTAGCAAAGTCTGTGTTCAACAGCCTATATGCATCTCCACAACCTCGAGGGGGTTTTTCAGCT | 1980 |
| <b>PA 246038 Method E</b> | 1921 | CTAGCAAAGTCTGTGTTCAACAGCCTATATGCATCTCCACAACCTCGAGGGGGTTTTTCAGCT | 1980 |
| <b>PA 246038 Method K</b> | 1921 | CTAGCAAAGTCTGTGTTCAACAGCCTATATGCATCTCCACAACCTCGAGGGGGTTTTTCAGCT | 1980 |
| <b>PA 246038 Method N</b> | 1921 | CTAGCAAAGTCTGTGTTCAACAGCCTATATGCATCTCCACAACCTCGAGGGGGTTTTTCAGCT | 1980 |

|                           |      |                                                               |      |
|---------------------------|------|---------------------------------------------------------------|------|
| <b>PA 246038 MiSeq</b>    | 1981 | GAATCAAGAAAATTGCTTCTCATTGTTTCAGGCACTTAGGGACAACCTGGAACCTGGAACC | 2040 |
| <b>PA 246038 Method A</b> | 1981 | GAATCAAGAAAATTGCTTCTCATTGTTTCAGGCACTTAGGGACAACCTGGAACCTGGAACC | 2040 |
| <b>PA 246038 Method S</b> | 1981 | GAATCAAGAAAATTGCTTCTCATTGTTTCAGGCACTTAGGGACAACCTGGAACCTGGAACC | 2040 |
| <b>PA 246038 Method E</b> | 1981 | GAATCAAGAAAATTGCTTCTCATTGTTTCAGGCACTTAGGGACAACCTGGAACCTGGAACC | 2040 |
| <b>PA 246038 Method K</b> | 1981 | GAATCAAGAAAATTGCTTCTCATTGTTTCAGGCACTTAGGGACAACCTGGAACCTGGAACC | 2040 |
| <b>PA 246038 Method N</b> | 1981 | GAATCAAGAAAATTGCTTCTCATTGTTTCAGGCACTTAGGGACAACCTGGAACCTGGAACC | 2040 |

|                           |      |                                                              |      |
|---------------------------|------|--------------------------------------------------------------|------|
| <b>PA 246038 MiSeq</b>    | 2041 | TTCGATCTTGGGGGGCTATATGAAGCAATTGAGGAGTGCCTGATTAACGATCCCTGGGTT | 2100 |
| <b>PA 246038 Method A</b> | 2041 | TTCGATCTTGGGGGGCTATATGAAGCAATTGAGGAGTGCCTGATTAACGATCCCTGGGTT | 2100 |
| <b>PA 246038 Method S</b> | 2041 | TTCGATCTTGGGGGGCTATATGAAGCAATTGAGGAGTGCCTGATTAACGATCCCTGGGTT | 2100 |
| <b>PA 246038 Method E</b> | 2041 | TTCGATCTTGGGGGGCTATATGAAGCAATTGAGGAGTGCCTGATTAACGATCCCTGGGTT | 2100 |
| <b>PA 246038 Method K</b> | 2041 | TTCGATCTTGGGGGGCTATATGAAGCAATTGAGGAGTGCCTGATTAACGATCCCTGGGTT | 2100 |
| <b>PA 246038 Method N</b> | 2041 | TTCGATCTTGGGGGGCTATATGAAGCAATTGAGGAGTGCCTGATTAACGATCCCTGGGTT | 2100 |

|                           |      |                                                     |      |
|---------------------------|------|-----------------------------------------------------|------|
| <b>PA 246038 MiSeq</b>    | 2101 | TTGCTTAATGCGTCTTGGTTCAACTCCTTCCTCACACATGCACTGAAATAG | 2151 |
| <b>PA 246038 Method A</b> | 2101 | TTGCTTAATGCGTCTTGGTTCAACTCCTTCCTCACACATGCACTGAAATAG | 2151 |
| <b>PA 246038 Method S</b> | 2101 | TTGCTTAATGCGTCTTGGTTCAACTCCTTCCTCACACATGCACTGAAATAG | 2151 |
| <b>PA 246038 Method E</b> | 2101 | TTGCTTAATGCGTCTTGGTTCAACTCCTTCCTCACACATGCACTGAAATAG | 2151 |
| <b>PA 246038 Method K</b> | 2101 | TTGCTTAATGCGTCTTGGTTCAACTCCTTCCTCACACATGCACTGAAATAG | 2151 |
| <b>PA 246038 Method N</b> | 2101 | TTGCTTAATGCGTCTTGGTTCAACTCCTTCCTCACACATGCACTGAAATAG | 2151 |
