# Supplementary material for: An Evaluation of Avian Influenza Virus Whole Genome Sequencing Approaches Using Nanopore Technology
Source: Preprints.org preprint supplement (doi:10.20944/preprints202301.0480.v1), 2023-01-26
Supplement: Supplementary file 32 [file supplementary]

## Formatted Alignments

|                    |     |                                                               |     |
|--------------------|-----|---------------------------------------------------------------|-----|
| NP 245625 MiSeq    | 1   | ATGGCGTCTCAAGGCACCAAACGACCCTATGAACAAATGGAAACTGGTGGGGAACGCCAG  | 60  |
| NP 245626 Method A | 1   | ATGGCGTCTCAAGGCACCAAACGACCCTATGAACAAATGGAAACTGGTGGGGAACGCCAG  | 60  |
| NP 245626 Method K | 1   | ATGGCGTCTCAAGGCACCAAACGACCCTATGAACAAATGGAAACTGGTGGGGAACGCCAG  | 60  |
| NP 245626 Method N | 1   | ATGGCGTCTCAAGGCACCAAACGACCCTATGAACAAATGGAAACTGGTGGGGAACGCCAG  | 60  |
|                    |     |                                                               |     |
| NP 245625 MiSeq    | 61  | AATGCCACTGAAATCAGAGCATCTGTTGGAAGAATGGTTGGCGGAATCGGGAGATTCTAC  | 120 |
| NP 245626 Method A | 61  | AATGCCACTGAAATCAGAGCATCTGTTGGAAGAATGGTTGGCGGAATCGGGAGATTCTAC  | 120 |
| NP 245626 Method K | 61  | AATGCCACTGAAATCAGAGCATCTGTTGGAAGAATGGTTGGCGGAATCGGGAGATTCTAC  | 120 |
| NP 245626 Method N | 61  | AATGCCACTGAAATCAGAGCATCTGTTGGAAGAATGGTTGGCGGAATCGGGAGATTCTAC  | 120 |
|                    |     |                                                               |     |
| NP 245625 MiSeq    | 121 | ATACAGATGTGCACTGAGCTCAAACCTCAGTGATTACGAAGGGAGGCTGATCCAAAACAGC | 180 |
| NP 245626 Method A | 121 | ATACAGATGTGCACTGAGCTCAAACCTCAGTGATTACGAAGGGAGGCTGATCCAAAACAGC | 180 |
| NP 245626 Method K | 121 | ATACAGATGTGCACTGAGCTCAAACCTCAGTGATTACGAAGGGAGGCTGATCCAAAACAGC | 180 |
| NP 245626 Method N | 121 | ATACAGATGTGCACTGAGCTCAAACCTCAGTGATTACGAAGGGAGGCTGATCCAAAACAGC | 180 |
|                    |     |                                                               |     |
| NP 245625 MiSeq    | 181 | ATAACCATAGAAAGGATGGTTCTCTCGGCATTTGATGAGAGGAGGAACAAGTACCTGGAG  | 240 |
| NP 245626 Method A | 181 | ATAACCATAGAAAGGATGGTTCTCTCGGCATTTGATGAGAGGAGGAACAAGTACCTGGAG  | 240 |
| NP 245626 Method K | 181 | ATAACCATAGAAAGGATGGTTCTCTCGGCATTTGATGAGAGGAGGAACAAGTACCTGGAG  | 240 |
| NP 245626 Method N | 181 | ATAACCATAGAAAGGATGGTTCTCTCGGCATTTGATGAGAGGAGGAACAAGTACCTGGAG  | 240 |
|                    |     |                                                               |     |
| NP 245625 MiSeq    | 241 | GAACATCCCAGTGCCGGGAAGGATCCCAAGAAGACTGGAGGTCCAATCTACAGGAGGAGA  | 300 |
| NP 245626 Method A | 241 | GAACATCCCAGTGCCGGGAAGGATCCCAAGAAGACTGGAGGTCCAATCTACAGGAGGAGA  | 300 |
| NP 245626 Method K | 241 | GAACATCCCAGTGCCGGGAAGGATCCCAAGAAGACTGGAGGTCCAATCTACAGGAGGAGA  | 300 |
| NP 245626 Method N | 241 | GAACATCCCAGTGCCGGGAAGGATCCCAAGAAGACTGGAGGTCCAATCTACAGGAGGAGA  | 300 |
|                    |     |                                                               |     |
| NP 245625 MiSeq    | 301 | GATGGCAAATGGGTGAGAGAGTTGATCCTCTACGACAAAGAAGAGATCAGAAGAATTTGG  | 360 |
| NP 245626 Method A | 301 | GATGGCAAATGGGTGAGAGAGTTGATCCTCTACGACAAAGAAGAGATCAGAAGAATTTGG  | 360 |
| NP 245626 Method K | 301 | GATGGCAAATGGGTGAGAGAGTTGATCCTCTACGACAAAGAAGAGATCAGAAGAATTTGG  | 360 |
| NP 245626 Method N | 301 | GATGGCAAATGGGTGAGAGAGTTGATCCTCTACGACAAAGAAGAGATCAGAAGAATTTGG  | 360 |

|                           |     |                                                            |     |
|---------------------------|-----|------------------------------------------------------------|-----|
| <b>NP 245625 MiSeq</b>    | 361 | CGTCAAGCTAATAATGGAGAGGATGCAACTGCTGGTCTCACTCATTGATGATTGGCAT | 420 |
| <b>NP 245626 Method A</b> | 361 | CGTCAAGCTAATAATGGAGAGGATGCAACTGCTGGTCTCACTCATTGATGATTGGCAT | 420 |
| <b>NP 245626 Method K</b> | 361 | CGTCAAGCTAATAATGGAGAGGATGCAACTGCTGGTCTCACTCATTGATGATTGGCAT | 420 |
| <b>NP 245626 Method N</b> | 361 | CGTCAAGCTAATAATGGAGAGGATGCAACTGCTGGTCTCACTCATTGATGATTGGCAT | 420 |

|                           |     |                                                               |     |
|---------------------------|-----|---------------------------------------------------------------|-----|
| <b>NP 245625 MiSeq</b>    | 421 | TCCAATCTGAATGATGCCACATAACCAGAGAACAAGGGCACTTGTGCGTACTGGAATGGAC | 480 |
| <b>NP 245626 Method A</b> | 421 | TCCAATCTGAATGATGCCACATAACCAGAGAACAAGGGCACTTGTGCGTACTGGAATGGAC | 480 |
| <b>NP 245626 Method K</b> | 421 | TCCAATCTGAATGATGCCACATAACCAGAGAACAAGGGCACTTGTGCGTACTGGAATGGAC | 480 |
| <b>NP 245626 Method N</b> | 421 | TCCAATCTGAATGATGCCACATAACCAGAGAACAAGGGCACTTGTGCGTACTGGAATGGAC | 480 |

|                           |     |                                                              |     |
|---------------------------|-----|--------------------------------------------------------------|-----|
| <b>NP 245625 MiSeq</b>    | 481 | CCTAGAATGTGCTCTCTGATGCAAGGCTCAACCCTCCCTAGGAGATCCGGGGCTGCTGGA | 540 |
| <b>NP 245626 Method A</b> | 481 | CCTAGAATGTGCTCTCTGATGCAAGGCTCAACCCTCCCTAGGAGATCCGGGGCTGCTGGA | 540 |
| <b>NP 245626 Method K</b> | 481 | CCTAGAATGTGCTCTCTGATGCAAGGCTCAACCCTCCCTAGGAGATCCGGGGCTGCTGGA | 540 |
| <b>NP 245626 Method N</b> | 481 | CCTAGAATGTGCTCTCTGATGCAAGGCTCAACCCTCCCTAGGAGATCCGGGGCTGCTGGA | 540 |

|                           |     |                                                               |     |
|---------------------------|-----|---------------------------------------------------------------|-----|
| <b>NP 245625 MiSeq</b>    | 541 | GCAGCAGTGAAAGGAGTTGGAACAATGGTGATGGAAC TAATTCGGATGATCAAACGAGGG | 600 |
| <b>NP 245626 Method A</b> | 541 | GCAGCAGTGAAAGGAGTTGGAACAATGGTGATGGAAC TAATTCGGATGATCAAACGAGGG | 600 |
| <b>NP 245626 Method K</b> | 541 | GCAGCAGTGAAAGGAGTTGGAACAATGGTGATGGAAC TAATTCGGATGATCAAACGAGGG | 600 |
| <b>NP 245626 Method N</b> | 541 | GCAGCAGTGAAAGGAGTTGGAACAATGGTGATGGAAC TAATTCGGATGATCAAACGAGGG | 600 |

|                           |     |                                                              |     |
|---------------------------|-----|--------------------------------------------------------------|-----|
| <b>NP 245625 MiSeq</b>    | 601 | ATCAATGATCGGAATTTCTGGAGAGGCGAAAACGGTCGGAGAACCAGGATTGCCTACGAG | 660 |
| <b>NP 245626 Method A</b> | 601 | ATCAATGATCGGAATTTCTGGAGAGGCGAAAACGGTCGGAGAACCAGGATTGCCTACGAG | 660 |
| <b>NP 245626 Method K</b> | 601 | ATCAATGATCGGAATTTCTGGAGAGGCGAAAACGGTCGGAGAACCAGGATTGCCTACGAG | 660 |
| <b>NP 245626 Method N</b> | 601 | ATCAATGATCGGAATTTCTGGAGAGGCGAAAACGGTCGGAGAACCAGGATTGCCTACGAG | 660 |

|                           |     |                                                               |     |
|---------------------------|-----|---------------------------------------------------------------|-----|
| <b>NP 245625 MiSeq</b>    | 661 | AGAATGTGCAACGTCCTCAAGGGAAAGTTCCAAACAGCAGCACAAACGGGCAATGATGGAC | 720 |
| <b>NP 245626 Method A</b> | 661 | AGAATGTGCAACGTCCTCAAGGGAAAGTTCCAAACAGCAGCACAAACGGGCAATGATGGAC | 720 |
| <b>NP 245626 Method K</b> | 661 | AGAATGTGCAACGTCCTCAAGGGAAAGTTCCAAACAGCAGCACAAACGGGCAATGATGGAC | 720 |
| <b>NP 245626 Method N</b> | 661 | AGAATGTGCAACGTCCTCAAGGGAAAGTTCCAAACAGCAGCACAAACGGGCAATGATGGAC | 720 |

|                    |      |                                                                |      |
|--------------------|------|----------------------------------------------------------------|------|
| NP 245625 MiSeq    | 721  | CAAGTGAGAGAAAGCCGGAATCCTGGGAATGCTGAAATTGAAGATCTCATCTTTCTCGCC   | 780  |
| NP 245626 Method A | 721  | CAAGTGAGAGAAAGCCGGAATCCTGGGAATGCTGAAATTGAAGATCTCATCTTTCTCGCC   | 780  |
| NP 245626 Method K | 721  | CAAGTGAGAGAAAGCCGGAATCCTGGGAATGCTGAAATTGAAGATCTCATCTTTCTCGCC   | 780  |
| NP 245626 Method N | 721  | CAAGTGAGAGAAAGCCGGAATCCTGGGAATGCTGAAATTGAAGATCTCATCTTTCTCGCC   | 780  |
|                    |      |                                                                |      |
| NP 245625 MiSeq    | 781  | CGATCTGCTCTCATCCTGAGGGGATCAGTGGCTCATAAGTCCTGTCTGCCTGCTTGCGTA   | 840  |
| NP 245626 Method A | 781  | CGATCTGCTCTCATCCTGAGGGGATCAGTGGCTCATAAGTCCTGTCTGCCTGCTTGCGTA   | 840  |
| NP 245626 Method K | 781  | CGATCTGCTCTCATCCTGAGGGGATCAGTGGCTCATAAGTCCTGTCTGCCTGCTTGCGTA   | 840  |
| NP 245626 Method N | 781  | CGATCTGCTCTCATCCTGAGGGGATCAGTGGCTCATAAGTCCTGTCTGCCTGCTTGCGTA   | 840  |
|                    |      |                                                                |      |
| NP 245625 MiSeq    | 841  | TATGGACTTGCTGTAGCCAGTGGATATGACTTTGAAAGAGAGGGATACTCTCTAGTCGGA   | 900  |
| NP 245626 Method A | 841  | TATGGACTTGCTGTAGCCAGTGGATATGACTTTGAAAGAGAGGGATACTCTCTAGTCGGA   | 900  |
| NP 245626 Method K | 841  | TATGGACTTGCTGTAGCCAGTGGATATGACTTTGAAAGAGAGGGATACTCTCTAGTCGGA   | 900  |
| NP 245626 Method N | 841  | TATGGACTTGCTGTAGCCAGTGGATATGACTTTGAAAGAGAGGGATACTCTCTAGTCGGA   | 900  |
|                    |      |                                                                |      |
| NP 245625 MiSeq    | 901  | ATTGATCCTTTCCGTCTGCTCCAAAACAGCCAAGTCTTCAGTCTCATCAGACCGAACGAA   | 960  |
| NP 245626 Method A | 901  | ATTGATCCTTTCCGTCTGCTCCAAAACAGCCAAGTCTTCAGTCTCATCAGACCGAACGAA   | 960  |
| NP 245626 Method K | 901  | ATTGATCCTTTCCGTCTGCTCCAAAACAGCCAAGTCTTCAGTCTCATCAGACCGAACGAA   | 960  |
| NP 245626 Method N | 901  | ATTGATCCTTTCCGTCTGCTCCAAAACAGCCAAGTCTTCAGTCTCATCAGACCGAACGAA   | 960  |
|                    |      |                                                                |      |
| NP 245625 MiSeq    | 961  | AATCCAGCTCATAAAAGTCAGCTGGTATGGATGGCATGCCACTCTGCGGCATTTGAGGAT   | 1020 |
| NP 245626 Method A | 961  | AATCCAGCTCATAAAAGTCAGCTGGTATGGATGGCATGCCACTCTGCGGCATTTGAGGAT   | 1020 |
| NP 245626 Method K | 961  | AATCCAGCTCATAAAAGTCAGCTGGTATGGATGGCATGCCACTCTGCGGCATTTGAGGAT   | 1020 |
| NP 245626 Method N | 961  | AATCCAGCTCATAAAAGTCAGCTGGTATGGATGGCATGCCACTCTGCGGCATTTGAGGAT   | 1020 |
|                    |      |                                                                |      |
| NP 245625 MiSeq    | 1021 | CTGAGAGTGTCAAGCTTTCATCAGAGGGACAAGAGTAGTCCCAAGAGGACAACCTGTCCACC | 1080 |
| NP 245626 Method A | 1021 | CTGAGAGTGTCAAGCTTTCATCAGAGGGACAAGAGTAGTCCCAAGAGGACAACCTGTCCACC | 1080 |
| NP 245626 Method K | 1021 | CTGAGAGTGTCAAGCTTTCATCAGAGGGACAAGAGTAGTCCCAAGAGGACAACCTGTCCACC | 1080 |
| NP 245626 Method N | 1021 | CTGAGAGTGTCAAGCTTTCATCAGAGGGACAAGAGTAGTCCCAAGAGGACAACCTGTCCACC | 1080 |

|                  |                 |      |                                                              |      |
|------------------|-----------------|------|--------------------------------------------------------------|------|
| <b>NP 245625</b> | <b>MiSeq</b>    | 1081 | AGAGGAGTTCAGATTGCTTCAAATGAAAACATGGAGACAATGGACTCCAGTACTCTTGAA | 1140 |
| <b>NP 245626</b> | <b>Method A</b> | 1081 | AGAGGAGTTCAGATTGCTTCAAATGAAAACATGGAGACAATGGACTCCAGTACTCTTGAA | 1140 |
| <b>NP 245626</b> | <b>Method K</b> | 1081 | AGAGGAGTTCAGATTGCTTCAAATGAAAACATGGAGACAATGGACTCCAGTACTCTTGAA | 1140 |
| <b>NP 245626</b> | <b>Method N</b> | 1081 | AGAGGAGTTCAGATTGCTTCAAATGAAAACATGGAGACAATGGACTCCAGTACTCTTGAA | 1140 |

|                  |                 |      |                                                              |      |
|------------------|-----------------|------|--------------------------------------------------------------|------|
| <b>NP 245625</b> | <b>MiSeq</b>    | 1141 | CTGAGGAGCAGATACTGGGCTATAAGAACAAGAAGTGGAGGAAACACTAACCAACAGAGA | 1200 |
| <b>NP 245626</b> | <b>Method A</b> | 1141 | CTGAGGAGCAGATACTGGGCTATAAGAACAAGAAGTGGAGGAAACACTAACCAACAGAGA | 1200 |
| <b>NP 245626</b> | <b>Method K</b> | 1141 | CTGAGGAGCAGATACTGGGCTATAAGAACAAGAAGTGGAGGAAACACTAACCAACAGAGA | 1200 |
| <b>NP 245626</b> | <b>Method N</b> | 1141 | CTGAGGAGCAGATACTGGGCTATAAGAACAAGAAGTGGAGGAAACACTAACCAACAGAGA | 1200 |

|                  |                 |      |                                                              |      |
|------------------|-----------------|------|--------------------------------------------------------------|------|
| <b>NP 245625</b> | <b>MiSeq</b>    | 1201 | GCATCTGCAGGACAAATCAGCGTACAGCCACATTCTCTGTGCAAAGAAACCTCCCATTCT | 1260 |
| <b>NP 245626</b> | <b>Method A</b> | 1201 | GCATCTGCAGGACAAATCAGCGTACAGCCACATTCTCTGTGCAAAGAAACCTCCCATTCT | 1260 |
| <b>NP 245626</b> | <b>Method K</b> | 1201 | GCATCTGCAGGACAAATCAGCGTACAGCCACATTCTCTGTGCAAAGAAACCTCCCATTCT | 1260 |
| <b>NP 245626</b> | <b>Method N</b> | 1201 | GCATCTGCAGGACAAATCAGCGTACAGCCACATTCTCTGTGCAAAGAAACCTCCCATTCT | 1260 |

|                  |                 |      |                                                              |      |
|------------------|-----------------|------|--------------------------------------------------------------|------|
| <b>NP 245625</b> | <b>MiSeq</b>    | 1261 | GAGAGAGCAACCATCATGGCAGCATTTACGGGAAACACTGAAGGCAGAACTTCAGACATG | 1320 |
| <b>NP 245626</b> | <b>Method A</b> | 1261 | GAGAGAGCAACCATCATGGCAGCATTTACGGGAAACACTGAAGGCAGAACTTCAGACATG | 1320 |
| <b>NP 245626</b> | <b>Method K</b> | 1261 | GAGAGAGCAACCATCATGGCAGCATTTACGGGAAACACTGAAGGCAGAACTTCAGACATG | 1320 |
| <b>NP 245626</b> | <b>Method N</b> | 1261 | GAGAGAGCAACCATCATGGCAGCATTTACGGGAAACACTGAAGGCAGAACTTCAGACATG | 1320 |

|                  |                 |      |                                                              |      |
|------------------|-----------------|------|--------------------------------------------------------------|------|
| <b>NP 245625</b> | <b>MiSeq</b>    | 1321 | AGAACTGAGATCATAAGGATGATGGAAAATGCCAGACCTGAAGATGTGTCTTTCCAGGGG | 1380 |
| <b>NP 245626</b> | <b>Method A</b> | 1321 | AGAACTGAGATCATAAGGATGATGGAAAATGCCAGACCTGAAGATGTGTCTTTCCAGGGG | 1380 |
| <b>NP 245626</b> | <b>Method K</b> | 1321 | AGAACTGAGATCATAAGGATGATGGAAAATGCCAGACCTGAAGATGTGTCTTTCCAGGGG | 1380 |
| <b>NP 245626</b> | <b>Method N</b> | 1321 | AGAACTGAGATCATAAGGATGATGGAAAATGCCAGACCTGAAGATGTGTCTTTCCAGGGG | 1380 |

|                  |                 |      |                                                              |      |
|------------------|-----------------|------|--------------------------------------------------------------|------|
| <b>NP 245625</b> | <b>MiSeq</b>    | 1381 | CGGGGAGTCTTCGAGCTCTCGGACGAAAAGGCAACGAACCCGATCGTGCCTTCCTTTGAC | 1440 |
| <b>NP 245626</b> | <b>Method A</b> | 1381 | CGGGGAGTCTTCGAGCTCTCGGACGAAAAGGCAACGAACCCGATCGTGCCTTCCTTTGAC | 1440 |
| <b>NP 245626</b> | <b>Method K</b> | 1381 | CGGGGAGTCTTCGAGCTCTCGGACGAAAAGGCAACGAACCCGATCGTGCCTTCCTTTGAC | 1440 |
| <b>NP 245626</b> | <b>Method N</b> | 1381 | CGGGGAGTCTTCGAGCTCTCGGACGAAAAGGCAACGAACCCGATCGTGCCTTCCTTTGAC | 1440 |

|                  |                 |      |                                                           |      |
|------------------|-----------------|------|-----------------------------------------------------------|------|
| <b>NP 245625</b> | <b>MiSeq</b>    | 1441 | ATGAGTAATGAAGGATCTTATTTCTTCGGAGACAATGCAGAGGAGTATGACAATTAA | 1497 |
| <b>NP 245626</b> | <b>Method A</b> | 1441 | ATGAGTAATGAAGGATCTTATTTCTTCGGAGACAATGCAGAGGAGTATGACAATTAA | 1497 |
| <b>NP 245626</b> | <b>Method K</b> | 1441 | ATGAGTAATGAAGGATCTTATTTCTTCGGAGACAATGCAGAGGAGTATGACAATTAA | 1497 |
| <b>NP 245626</b> | <b>Method N</b> | 1441 | ATGAGTAATGAAGGATCTTATTTCTTCGGAGACAATGCAGAGGAGTATGACAATTAA | 1497 |
