# Supplementary material for: An Evaluation of Avian Influenza Virus Whole Genome Sequencing Approaches Using Nanopore Technology
Source: Preprints.org preprint supplement (doi:10.20944/preprints202301.0480.v1), 2023-01-26
Supplement: Supplementary file 35 [file supplementary]

## Formatted Alignments

|                           |   |                                                                                |    |
|---------------------------|---|--------------------------------------------------------------------------------|----|
| <b>NP 245467 MiSeq</b>    | 1 | ATGGCTTCTCAAGGCACCAAACGATCCTATGAACAAATGGAAACTGGTGGGGAACGCCAG                   | 60 |
| <b>NP 245467 Method A</b> | 1 | ATGGCTTCTCAAGGCACCAAACGATCCTATGAACAAATGGAAACTGGTGGGGAACGCCAG                   | 60 |
| <b>NP 245467 Method S</b> | 1 | ATGGC <b>G</b> TCTCAAGGCACCAAACGATCCTATGAACAAATGGAAACTGGTGGGG <b>A</b> GCGCCAG | 60 |
| <b>NP 245467 Method E</b> | 1 | ATGGCTTCTCAAGGCACCAAACGATCCTATGAACAAATGGAAACTGGTGGGGAACGCCAG                   | 60 |
| <b>NP 245467 method K</b> | 1 | ATGGCTTCTCAAGGCACCAAACGATCCTATGAACAAATGGAAACTGGTGGGGAACGCCAG                   | 60 |
| <b>NP 245467 Method N</b> | 1 | ATGGCTTCTCAAGGCACCAAACGATCCTATGAACAAATGGAAACTGGTGGGGAACGCCAG                   | 60 |

|                           |    |                                                              |     |
|---------------------------|----|--------------------------------------------------------------|-----|
| <b>NP 245467 MiSeq</b>    | 61 | AATGCCACTGAAATCAGAGCATCTGTTGGAAGAATGGTTGGCGGAATCGGGAGATTCTAC | 120 |
| <b>NP 245467 Method A</b> | 61 | AATGCCACTGAAATCAGAGCATCTGTTGGAAGAATGGTTGGCGGAATCGGGAGATTCTAC | 120 |
| <b>NP 245467 Method S</b> | 61 | AATGCCACTGAAATCAGAGCATCTGTTGGAAGAATGGTTGGCGGAATCGGGAGATTCTAC | 120 |
| <b>NP 245467 Method E</b> | 61 | AATGCCACTGAAATCAGAGCATCTGTTGGAAGAATGGTTGGCGGAATCGGGAGATTCTAC | 120 |
| <b>NP 245467 method K</b> | 61 | AATGCCACTGAAATCAGAGCATCTGTTGGAAGAATGGTTGGCGGAATCGGGAGATTCTAC | 120 |
| <b>NP 245467 Method N</b> | 61 | AATGCCACTGAAATCAGAGCATCTGTTGGAAGAATGGTTGGCGGAATCGGGAGATTCTAC | 120 |

|                           |     |                                                                       |     |
|---------------------------|-----|-----------------------------------------------------------------------|-----|
| <b>NP 245467 MiSeq</b>    | 121 | ATACAGATGTGCACTGAGCTCAAACCTCAGTGATTACGAAGGGAGGCTGATCCAAAACAGC         | 180 |
| <b>NP 245467 Method A</b> | 121 | ATACAGATGTGCACTGAGCTCAAACCTCAGTGATTACGAAGGGAGGCTGATCCAAAACAGC         | 180 |
| <b>NP 245467 Method S</b> | 121 | ATACA <b>A</b> TGTGCACTGAGCTCAAACCTCAGTGATTACGAAGGGAGGCTGATCCAAAACAGC | 180 |
| <b>NP 245467 Method E</b> | 121 | ATACAGATGTGCACTGAGCTCAAACCTCAGTGATTACGAAGGGAGGCTGATCCAAAACAGC         | 180 |
| <b>NP 245467 method K</b> | 121 | ATACAGATGTGCACTGAGCTCAAACCTCAGTGATTACGAAGGGAGGCTGATCCAAAACAGC         | 180 |
| <b>NP 245467 Method N</b> | 121 | ATACAGATGTGCACTGAGCTCAAACCTCAGTGATTACGAAGGGAGGCTGATCCAAAACAGC         | 180 |

|                           |     |                                                              |     |
|---------------------------|-----|--------------------------------------------------------------|-----|
| <b>NP 245467 MiSeq</b>    | 181 | ATAACCATAGAAAGGATGGTTCTCTCGGCATTTGATGAGAGGAGGAACAAGTATCTGGAG | 240 |
| <b>NP 245467 Method A</b> | 181 | ATAACCATAGAAAGGATGGTTCTCTCGGCATTTGATGAGAGGAGGAACAAGTATCTGGAG | 240 |
| <b>NP 245467 Method S</b> | 181 | ATAACCATAGAAAGGATGGTTCTCTCGGCATTTGATGAGAGGAGGAACAAGTATCTGGAG | 240 |
| <b>NP 245467 Method E</b> | 181 | ATAACCATAGAAAGGATGGTTCTCTCGGCATTTGATGAGAGGAGGAACAAGTATCTGGAG | 240 |
| <b>NP 245467 method K</b> | 181 | ATAACCATAGAAAGGATGGTTCTCTCGGCATTTGATGAGAGGAGGAACAAGTATCTGGAG | 240 |
| <b>NP 245467 Method N</b> | 181 | ATAACCATAGAAAGGATGGTTCTCTCGGCATTTGATGAGAGGAGGAACAAGTATCTGGAG | 240 |

|                           |     |                                                              |     |
|---------------------------|-----|--------------------------------------------------------------|-----|
| <b>NP 245467 MiSeq</b>    | 241 | GAACATCCCAGTGCTGGGAAGGATCCCAAGAAGACTGGAGGTCCAATCTACAGGAGGAGA | 300 |
| <b>NP 245467 Method A</b> | 241 | GAACATCCCAGTGCTGGGAAGGATCCCAAGAAGACTGGAGGTCCAATCTACAGGAGGAGA | 300 |
| <b>NP 245467 Method S</b> | 241 | GAACATCCCAGTGCTGGGAAGGATCCCAAGAAGACTGGAGGTCCAATCTACAGGAGGAGA | 300 |
| <b>NP 245467 Method E</b> | 241 | GAACATCCCAGTGCTGGGAAGGATCCCAAGAAGACTGGAGGTCCAATCTACAGGAGGAGA | 300 |
| <b>NP 245467 method K</b> | 241 | GAACATCCCAGTGCTGGGAAGGATCCCAAGAAGACTGGAGGTCCAATCTACAGGAGGAGA | 300 |
| <b>NP 245467 Method N</b> | 241 | GAACATCCCAGTGCTGGGAAGGATCCCAAGAAGACTGGAGGTCCAATCTACAGGAGGAGA | 300 |

|                           |     |                                                              |     |
|---------------------------|-----|--------------------------------------------------------------|-----|
| <b>NP 245467 MiSeq</b>    | 301 | GATGGCAAATGGATGAGAGAGTTGATCCTCTACGACAAAGAAGAGATCAGAAGAATTTGG | 360 |
| <b>NP 245467 Method A</b> | 301 | GATGGCAAATGGATGAGAGAGTTGATCCTCTACGACAAAGAAGAGATCAGAAGAATTTGG | 360 |
| <b>NP 245467 Method S</b> | 301 | GATGGCAAATGGATGAGAGAGTTGATCCTCTACGACAAAGAAGAGATCAGAAGAATTTGG | 360 |
| <b>NP 245467 Method E</b> | 301 | GATGGCAAATGGATGAGAGAGTTGATCCTCTACGACAAAGAAGAGATCAGAAGAATTTGG | 360 |
| <b>NP 245467 method K</b> | 301 | GATGGCAAATGGATGAGAGAGTTGATCCTCTACGACAAAGAAGAGATCAGAAGAATTTGG | 360 |
| <b>NP 245467 Method N</b> | 301 | GATGGCAAATGGATGAGAGAGTTGATCCTCTACGACAAAGAAGAGATCAGAAGAATTTGG | 360 |

|                           |     |                                                              |     |
|---------------------------|-----|--------------------------------------------------------------|-----|
| <b>NP 245467 MiSeq</b>    | 361 | CGTCAAGCTAATAATGGAGAGGATGCAACTGCTGGTCTCACTCATTTGATGATTTGGCAT | 420 |
| <b>NP 245467 Method A</b> | 361 | CGTCAAGCTAATAATGGAGAGGATGCAACTGCTGGTCTCACTCATTTGATGATTTGGCAT | 420 |
| <b>NP 245467 Method S</b> | 361 | CGTCAAGCTAATAATGGAGAGGATGCAACTGCTGGTCTCACTCATTTGATGATTTGGCAT | 420 |
| <b>NP 245467 Method E</b> | 361 | CGTCAAGCTAATAATGGAGAGGATGCAACTGCTGGTCTCACTCATTTGATGATTTGGCAT | 420 |
| <b>NP 245467 method K</b> | 361 | CGTCAAGCTAATAATGGAGAGGATGCAACTGCTGGTCTCACTCATTTGATGATTTGGCAT | 420 |
| <b>NP 245467 Method N</b> | 361 | CGTCAAGCTAATAATGGAGAGGATGCAACTGCTGGTCTCACTCATTTGATGATTTGGCAT | 420 |

|                           |     |                                                              |     |
|---------------------------|-----|--------------------------------------------------------------|-----|
| <b>NP 245467 MiSeq</b>    | 421 | TCCAATTTGAATGATGCCACATACCAGAGAACAAGGGCACTTGTGCGTACTGGAATGGAC | 480 |
| <b>NP 245467 Method A</b> | 421 | TCCAATTTGAATGATGCCACATACCAGAGAACAAGGGCACTTGTGCGTACTGGAATGGAC | 480 |
| <b>NP 245467 Method S</b> | 421 | TCCAATTTGAATGATGCCACATACCAGAGAACAAGGGCACTTGTGCGTACTGGAATGGAC | 480 |
| <b>NP 245467 Method E</b> | 421 | TCCAATTTGAATGATGCCACATACCAGAGAACAAGGGCACTTGTGCGTACTGGAATGGAC | 480 |
| <b>NP 245467 method K</b> | 421 | TCCAATTTGAATGATGCCACATACCAGAGAACAAGGGCACTTGTGCGTACTGGAATGGAC | 480 |
| <b>NP 245467 Method N</b> | 421 | TCCAATTTGAATGATGCCACATACCAGAGAACAAGGGCACTTGTGCGTACTGGAATGGAC | 480 |

|                           |     |                                                              |     |
|---------------------------|-----|--------------------------------------------------------------|-----|
| <b>NP 245467 MiSeq</b>    | 481 | CCTAGGATGTGCTCTCTGATGCAAGGCTCAACCCTCCCTAGGAGATCCGGGGCTGCTGGA | 540 |
| <b>NP 245467 Method A</b> | 481 | CCTAGGATGTGCTCTCTGATGCAAGGCTCAACCCTCCCTAGGAGATCCGGGGCTGCTGGA | 540 |
| <b>NP 245467 Method S</b> | 481 | CCTAGGATGTGCTCTCTGATGCAAGGCTCAACCCTCCCTAGGAGATCCGGGGCTGCTGGA | 540 |
| <b>NP 245467 Method E</b> | 481 | CCTAGGATGTGCTCTCTGATGCAAGGCTCAACCCTCCCTAGGAGATCCGGGGCTGCTGGA | 540 |
| <b>NP 245467 method K</b> | 481 | CCTAGGATGTGCTCTCTGATGCAAGGCTCAACCCTCCCTAGGAGATCCGGGGCTGCTGGA | 540 |
| <b>NP 245467 Method N</b> | 481 | CCTAGGATGTGCTCTCTGATGCAAGGCTCAACCCTCCCTAGGAGATCCGGGGCTGCTGGA | 540 |

|                           |     |                                                                 |     |
|---------------------------|-----|-----------------------------------------------------------------|-----|
| <b>NP 245467 MiSeq</b>    | 541 | GCAGCCGTGAAAGGAGTTGGAACAATGGTGATGGAATTGATTTCGGATGATCAAACGAGGG   | 600 |
| <b>NP 245467 Method A</b> | 541 | GCAGCCGTGAAAGGAGTTGGAACAATGGTGATGGAATTGATTTCGGATGATCAAACGAGGG   | 600 |
| <b>NP 245467 Method S</b> | 541 | GCAGC[A]GTGAAAGGAGTTGGAACAATGGTGATGGAATTGATTTCGGATGATCAAACGAGGG | 600 |
| <b>NP 245467 Method E</b> | 541 | GCAGCCGTGAAAGGAGTTGGAACAATGGTGATGGAATTGATTTCGGATGATCAAACGAGGG   | 600 |
| <b>NP 245467 method K</b> | 541 | GCAGCCGTGAAAGGAGTTGGAACAATGGTGATGGAATTGATTTCGGATGATCAAACGAGGG   | 600 |
| <b>NP 245467 Method N</b> | 541 | GCAGCCGTGAAAGGAGTTGGAACAATGGTGATGGAATTGATTTCGGATGATCAAACGAGGG   | 600 |

|                           |     |                                                                |     |
|---------------------------|-----|----------------------------------------------------------------|-----|
| <b>NP 245467 MiSeq</b>    | 601 | ATCAATGATCGGAATTTCTGGAGAGGCGAAAAATGGACGGAGAACCAGGATTGCCTACGAG  | 660 |
| <b>NP 245467 Method A</b> | 601 | ATCAATGATCGGAATTTCTGGAGAGGCGAAAAATGGACGGAGAACCAGGATTGCCTACGAG  | 660 |
| <b>NP 245467 Method S</b> | 601 | ATCAATGATCGGAATTTCTGGAGAGGCGAAAA[Q]GGACGGAGAACCAGGATTGCCTACGAG | 660 |
| <b>NP 245467 Method E</b> | 601 | ATCAATGATCGGAATTTCTGGAGAGGCGAAAAATGGACGGAGAACCAGGATTGCCTACGAG  | 660 |
| <b>NP 245467 method K</b> | 601 | ATCAATGATCGGAATTTCTGGAGAGGCGAAAAATGGACGGAGAACCAGGATTGCCTACGAG  | 660 |
| <b>NP 245467 Method N</b> | 601 | ATCAATGATCGGAATTTCTGGAGAGGCGAAAAATGGACGGAGAACCAGGATTGCCTACGAG  | 660 |

|                           |     |                                                                 |     |
|---------------------------|-----|-----------------------------------------------------------------|-----|
| <b>NP 245467 MiSeq</b>    | 661 | AGAATGTGCAACATTCTCAAGGGAAAGTTCCAAACAGCAGCACAAACGAGCAATGATGGAC   | 720 |
| <b>NP 245467 Method A</b> | 661 | AGAATGTGCAACATTCTCAAGGGAAAGTTCCAAACAGCAGCACAAACGAGCAATGATGGAC   | 720 |
| <b>NP 245467 Method S</b> | 661 | AGAATGTGCAACAT[Q]CTCAAGGGAAAGTTCCAAACAGCAGCACAAACGAGCAATGATGGAC | 720 |
| <b>NP 245467 Method E</b> | 661 | AGAATGTGCAACATTCTCAAGGGAAAGTTCCAAACAGCAGCACAAACGAGCAATGATGGAC   | 720 |
| <b>NP 245467 method K</b> | 661 | AGAATGTGCAACATTCTCAAGGGAAAGTTCCAAACAGCAGCACAAACGAGCAATGATGGAC   | 720 |
| <b>NP 245467 Method N</b> | 661 | AGAATGTGCAACATTCTCAAGGGAAAGTTCCAAACAGCAGCACAAACGAGCAATGATGGAC   | 720 |

|                    |     |                                                                 |     |
|--------------------|-----|-----------------------------------------------------------------|-----|
| NP 245467 MiSeq    | 721 | CAAGTGAGGGGAAAGCCGGAATCCTGGGAATGCTGAGATTGAAGATCTCATCTTTCTCGCA   | 780 |
| NP 245467 Method A | 721 | CAAGTGAGGGGAAAGCCGGAATCCTGGGAATGCTGAGATTGAAGATCTCATCTTTCTCGCA   | 780 |
| NP 245467 Method S | 721 | CAAGTGAGGGGAAAGCCGGAATCCTGGGAATGCTGA[A]ATTGAAGATCTCATCTTTCTCGCA | 780 |
| NP 245467 Method E | 721 | CAAGTGAGGGGAAAGCCGGAATCCTGGGAATGCTGAGATTGAAGATCTCATCTTTCTCGCA   | 780 |
| NP 245467 method K | 721 | CAAGTGAGGGGAAAGCCGGAATCCTGGGAATGCTGAGATTGAAGATCTCATCTTTCTCGCA   | 780 |
| NP 245467 Method N | 721 | CAAGTGAGGGGAAAGCCGGAATCCTGGGAATGCTGAGATTGAAGATCTCATCTTTCTCGCA   | 780 |

|                    |     |                                                                    |     |
|--------------------|-----|--------------------------------------------------------------------|-----|
| NP 245467 MiSeq    | 781 | CGATCTGCTCTCATTCTGAGGGGATCAGTGGCTCACAAAGTCCTGTCTGCCTGCTTGCGTG      | 840 |
| NP 245467 Method A | 781 | CGATCTGCTCTCATTCTGAGGGGATCAGTGGCTCACAAAGTCCTGTCTGCCTGCTTGCGTG      | 840 |
| NP 245467 Method S | 781 | CGATCTGCTCT[A]AT[C]CTGAGGGGATCAGTGGCTCA[T]AAGTCCTGTCTGCCTGCTTGCGTG | 840 |
| NP 245467 Method E | 781 | CGATCTGCTCTCATTCTGAGGGGATCAGTGGCTCACAAAGTCCTGTCTGCCTGCTTGCGTG      | 840 |
| NP 245467 method K | 781 | CGATCTGCTCTCATTCTGAGGGGATCAGTGGCTCACAAAGTCCTGTCTGCCTGCTTGCGTG      | 840 |
| NP 245467 Method N | 781 | CGATCTGCTCTCATTCTGAGGGGATCAGTGGCTCACAAAGTCCTGTCTGCCTGCTTGCGTG      | 840 |

|                    |     |                                                                     |     |
|--------------------|-----|---------------------------------------------------------------------|-----|
| NP 245467 MiSeq    | 841 | TATGGACTTGCTGTAGCCAGTGGATATGACTTTGAAAGAGAAGGATACTCTCTAGTCGGG        | 900 |
| NP 245467 Method A | 841 | TATGGACTTGCTGTAGCCAGTGGATATGACTTTGAAAGAGAAGGATACTCTCTAGTCGGG        | 900 |
| NP 245467 Method S | 841 | TATGGACTTGCTGTAGCCAGTGGATATGACTTTGAAAG[G]GA[G]GGATACTCTCTAGTCGGG[A] | 900 |
| NP 245467 Method E | 841 | TATGGACTTGCTGTAGCCAGTGGATATGACTTTGAAAGAGAAGGATACTCTCTAGTCGGG        | 900 |
| NP 245467 method K | 841 | TATGGACTTGCTGTAGCCAGTGGATATGACTTTGAAAGAGAAGGATACTCTCTAGTCGGG        | 900 |
| NP 245467 Method N | 841 | TATGGACTTGCTGTAGCCAGTGGATATGACTTTGAAAGAGAAGGATACTCTCTAGTCGGG        | 900 |

|                    |     |                                                                    |     |
|--------------------|-----|--------------------------------------------------------------------|-----|
| NP 245467 MiSeq    | 901 | ATTGATCCTTTCCGTCTACTCCAAAACAGTCAAGTCTTCAGTCTCATCAGACCAAACGAA       | 960 |
| NP 245467 Method A | 901 | ATTGATCCTTTCCGTCTACTCCAAAACAGTCAAGTCTTCAGTCTCATCAGACCAAACGAA       | 960 |
| NP 245467 Method S | 901 | ATTGATCCTTTCCGTCTCT[G]CTCCAAAACAGTCAAGTCTTCAGTCTCATCAGACC[G]AACGAA | 960 |
| NP 245467 Method E | 901 | ATTGATCCTTTCCGTCTACTCCAAAACAGTCAAGTCTTCAGTCTCATCAGACCAAACGAA       | 960 |
| NP 245467 method K | 901 | ATTGATCCTTTCCGTCTACTCCAAAACAGTCAAGTCTTCAGTCTCATCAGACCAAACGAA       | 960 |
| NP 245467 Method N | 901 | ATTGATCCTTTCCGTCTACTCCAAAACAGTCAAGTCTTCAGTCTCATCAGACCAAACGAA       | 960 |

|                           |     |                                                                  |      |
|---------------------------|-----|------------------------------------------------------------------|------|
| <b>NP 245467 MiSeq</b>    | 961 | AATCCAGCTCATAAAAGTCAGCTGGTATGGATGGCATGCCACTCTGCAGCATTCGAGGAT     | 1020 |
| <b>NP 245467 Method A</b> | 961 | AATCCAGCTCATAAAAGTCAGCTGGTATGGATGGCATGCCACTCTGCAGCATTCGAGGAT     | 1020 |
| <b>NP 245467 Method S</b> | 961 | AATCCAGCTCATAAAAGTCAGCTGGTATGGATGGCATGCCACTCTGC[G]GCATT[T]GAGGAT | 1020 |
| <b>NP 245467 Method E</b> | 961 | AATCCAGCTCATAAAAGTCAGCTGGTATGGATGGCATGCCACTCTGCAGCATTCGAGGAT     | 1020 |
| <b>NP 245467 method K</b> | 961 | AATCCAGCTCATAAAAGTCAGCTGGTATGGATGGCATGCCACTCTGCAGCATTCGAGGAT     | 1020 |
| <b>NP 245467 Method N</b> | 961 | AATCCAGCTCATAAAAGTCAGCTGGTATGGATGGCATGCCACTCTGCAGCATTCGAGGAT     | 1020 |

|                           |      |                                                              |      |
|---------------------------|------|--------------------------------------------------------------|------|
| <b>NP 245467 MiSeq</b>    | 1021 | CTGAGAGTGTCAAGCTTCATCAGAGGGACAAGAGTAGTCCCAAGAGGACAACGTGCCACC | 1080 |
| <b>NP 245467 Method A</b> | 1021 | CTGAGAGTGTCAAGCTTCATCAGAGGGACAAGAGTAGTCCCAAGAGGACAACGTGCCACC | 1080 |
| <b>NP 245467 Method S</b> | 1021 | CTGAGAGTGTCAAGCTTCATCAGAGGGACAAGAGTAGTCCCAAGAGGACAACGTGCCACC | 1080 |
| <b>NP 245467 Method E</b> | 1021 | CTGAGAGTGTCAAGCTTCATCAGAGGGACAAGAGTAGTCCCAAGAGGACAACGTGCCACC | 1080 |
| <b>NP 245467 method K</b> | 1021 | CTGAGAGTGTCAAGCTTCATCAGAGGGACAAGAGTAGTCCCAAGAGGACAACGTGCCACC | 1080 |
| <b>NP 245467 Method N</b> | 1021 | CTGAGAGTGTCAAGCTTCATCAGAGGGACAAGAGTAGTCCCAAGAGGACAACGTGCCACC | 1080 |

|                           |      |                                                                     |      |
|---------------------------|------|---------------------------------------------------------------------|------|
| <b>NP 245467 MiSeq</b>    | 1081 | AGAGGAGTTCAGATTGCTTCAAATGAAAACATGGATACGATGGACTCCAATACTCTTGAA        | 1140 |
| <b>NP 245467 Method A</b> | 1081 | AGAGGAGTTCAGATTGCTTCAAATGAAAACATGGATACGATGGACTCCAATACTCTTGAA        | 1140 |
| <b>NP 245467 Method S</b> | 1081 | AGAGGAGTTCAGATTGCTTCAAATGAAAACATGGAG[G]AC[A]ATGGACTCCA[G]TACTCTTGAA | 1140 |
| <b>NP 245467 Method E</b> | 1081 | AGAGGAGTTCAGATTGCTTCAAATGAAAACATGGATACGATGGACTCCAATACTCTTGAA        | 1140 |
| <b>NP 245467 method K</b> | 1081 | AGAGGAGTTCAGATTGCTTCAAATGAAAACATGGATACGATGGACTCCAATACTCTTGAA        | 1140 |
| <b>NP 245467 Method N</b> | 1081 | AGAGGAGTTCAGATTGCTTCAAATGAAAACATGGATACGATGGACTCCAATACTCTTGAA        | 1140 |

|                           |      |                                                              |      |
|---------------------------|------|--------------------------------------------------------------|------|
| <b>NP 245467 MiSeq</b>    | 1141 | CTGAGGAGCAGATACTGGGCTATAAGAACAAGAAGTGGAGGAAACACTAACCAACAGAGA | 1200 |
| <b>NP 245467 Method A</b> | 1141 | CTGAGGAGCAGATACTGGGCTATAAGAACAAGAAGTGGAGGAAACACTAACCAACAGAGA | 1200 |
| <b>NP 245467 Method S</b> | 1141 | CTGAGGAGCAGATACTGGGCTATAAGAACAAGAAGTGGAGGAAACACTAACCAACAGAGA | 1200 |
| <b>NP 245467 Method E</b> | 1141 | CTGAGGAGCAGATACTGGGCTATAAGAACAAGAAGTGGAGGAAACACTAACCAACAGAGA | 1200 |
| <b>NP 245467 method K</b> | 1141 | CTGAGGAGCAGATACTGGGCTATAAGAACAAGAAGTGGAGGAAACACTAACCAACAGAGA | 1200 |
| <b>NP 245467 Method N</b> | 1141 | CTGAGGAGCAGATACTGGGCTATAAGAACAAGAAGTGGAGGAAACACTAACCAACAGAGA | 1200 |

|                           |      |                                                              |      |
|---------------------------|------|--------------------------------------------------------------|------|
| <b>NP 245467 MiSeq</b>    | 1201 | GCATCTGCAGGACAAATCAGCGTACAGCCCACATTCTCTGTGCAGAGAAACCTCCCATTC | 1260 |
| <b>NP 245467 Method A</b> | 1201 | GCATCTGCAGGACAAATCAGCGTACAGCCCACATTCTCTGTGCAGAGAAACCTCCCATTC | 1260 |
| <b>NP 245467 Method S</b> | 1201 | GCATCTGCAGGACAAATCAGCGTACAGCCCACATTCTCTGTGCAGAGAAACCTCCCATTC | 1260 |
| <b>NP 245467 Method E</b> | 1201 | GCATCTGCAGGACAAATCAGCGTACAGCCCACATTCTCTGTGCAGAGAAACCTCCCATTC | 1260 |
| <b>NP 245467 method K</b> | 1201 | GCATCTGCAGGACAAATCAGCGTACAGCCCACATTCTCTGTGCAGAGAAACCTCCCATTC | 1260 |
| <b>NP 245467 Method N</b> | 1201 | GCATCTGCAGGACAAATCAGCGTACAGCCCACATTCTCTGTGCAGAGAAACCTCCCATTC | 1260 |

|                           |      |                                                              |      |
|---------------------------|------|--------------------------------------------------------------|------|
| <b>NP 245467 MiSeq</b>    | 1261 | GAGAGAGCAACCATCATGGCAGCATTTACGGGAAACACTGAAGGCAGAACTTCAGACATG | 1320 |
| <b>NP 245467 Method A</b> | 1261 | GAGAGAGCAACCATCATGGCAGCATTTACGGGAAACACTGAAGGCAGAACTTCAGACATG | 1320 |
| <b>NP 245467 Method S</b> | 1261 | GAGAGAGCAACCATCATGGCAGCATTTACGGGAAACACTGAAGGCAGAACTTCAGACATG | 1320 |
| <b>NP 245467 Method E</b> | 1261 | GAGAGAGCAACCATCATGGCAGCATTTACGGGAAACACTGAAGGCAGAACTTCAGACATG | 1320 |
| <b>NP 245467 method K</b> | 1261 | GAGAGAGCAACCATCATGGCAGCATTTACGGGAAACACTGAAGGCAGAACTTCAGACATG | 1320 |
| <b>NP 245467 Method N</b> | 1261 | GAGAGAGCAACCATCATGGCAGCATTTACGGGAAACACTGAAGGCAGAACTTCAGACATG | 1320 |

|                           |      |                                                              |      |
|---------------------------|------|--------------------------------------------------------------|------|
| <b>NP 245467 MiSeq</b>    | 1321 | AGAACTGAGATCATAAGGATGATGGAAAATGCCAGACCTGAAGATGTGTCTTTCCAGGGG | 1380 |
| <b>NP 245467 Method A</b> | 1321 | AGAACTGAGATCATAAGGATGATGGAAAATGCCAGACCTGAAGATGTGTCTTTCCAGGGG | 1380 |
| <b>NP 245467 Method S</b> | 1321 | AGAACTGAGATCATAAGGATGATGGAAAATGCCAGACCTGAAGATGTGTCTTTCCAGGGG | 1380 |
| <b>NP 245467 Method E</b> | 1321 | AGAACTGAGATCATAAGGATGATGGAAAATGCCAGACCTGAAGATGTGTCTTTCCAGGGG | 1380 |
| <b>NP 245467 method K</b> | 1321 | AGAACTGAGATCATAAGGATGATGGAAAATGCCAGACCTGAAGATGTGTCTTTCCAGGGG | 1380 |
| <b>NP 245467 Method N</b> | 1321 | AGAACTGAGATCATAAGGATGATGGAAAATGCCAGACCTGAAGATGTGTCTTTCCAGGGG | 1380 |

|                           |      |                                                              |      |
|---------------------------|------|--------------------------------------------------------------|------|
| <b>NP 245467 MiSeq</b>    | 1381 | CGGGGAGTCTTCGAGCTCTCGGACGAAAAGGCAACGAACCCGATCGTGCCTTCCTTTGAC | 1440 |
| <b>NP 245467 Method A</b> | 1381 | CGGGGAGTCTTCGAGCTCTCGGACGAAAAGGCAACGAACCCGATCGTGCCTTCCTTTGAC | 1440 |
| <b>NP 245467 Method S</b> | 1381 | CGGGGAGTCTTCGAGCTCTCGGACGAAAAGGCAACGAACCCGATCGTGCCTTCCTTTGAC | 1440 |
| <b>NP 245467 Method E</b> | 1381 | CGGGGAGTCTTCGAGCTCTCGGACGAAAAGGCAACGAACCCGATCGTGCCTTCCTTTGAC | 1440 |
| <b>NP 245467 method K</b> | 1381 | CGGGGAGTCTTCGAGCTCTCGGACGAAAAGGCAACGAACCCGATCGTGCCTTCCTTTGAC | 1440 |
| <b>NP 245467 Method N</b> | 1381 | CGGGGAGTCTTCGAGCTCTCGGACGAAAAGGCAACGAACCCGATCGTGCCTTCCTTTGAC | 1440 |

|                           |      |                                                           |      |
|---------------------------|------|-----------------------------------------------------------|------|
| <b>NP 245467 MiSeq</b>    | 1441 | ATGAGCAATGAAGGATCTTATTTCTTCGGAGACAATGCAGAGGAGTATGACAATTAA | 1497 |
| <b>NP 245467 Method A</b> | 1441 | ATGAGCAATGAAGGATCTTATTTCTTCGGAGACAATGCAGAGGAGTATGACAATTAA | 1497 |
| <b>NP 245467 Method S</b> | 1441 | ATGAGCAATGAAGGATCTTATTTCTTCGGAGACAATGCAGAGGAGTATGACAATTAA | 1497 |
| <b>NP 245467 Method E</b> | 1441 | ATGAGCAATGAAGGATCTTATTTCTTCGGAGACAATGCAGAGGAGTATGACAATTAA | 1497 |
| <b>NP 245467 method K</b> | 1441 | ATGAGCAATGAAGGATCTTATTTCTTCGGAGACAATGCAGAGGAGTATGACAATTAA | 1497 |
| <b>NP 245467 Method N</b> | 1441 | ATGAGCAATGAAGGATCTTATTTCTTCGGAGACAATGCAGAGGAGTATGACAATTAA | 1497 |
