# Supplementary material for: An Evaluation of Avian Influenza Virus Whole Genome Sequencing Approaches Using Nanopore Technology
Source: Preprints.org preprint supplement (doi:10.20944/preprints202301.0480.v1), 2023-01-26
Supplement: Supplementary file 37 [file supplementary]

## Formatted Alignments

|                     |     |                                                              |     |
|---------------------|-----|--------------------------------------------------------------|-----|
| PB1 245625 MiSeq    | 1   | ATGGATGTCAATCCGACTTTACTTTTCTTAAAAGTGCCAGCGCAAAATGCCATAAGTACC | 60  |
| PB1 245626 Method A | 1   | ATGGATGTCAATCCGACTTTACTTTTCTTAAAAGTGCCAGCGCAAAATGCCATAAGTACC | 60  |
| PB1 245626 Method E | 1   | ATGGATGTCAATCCGACTTTACTTTTCTTAAAAGTGCCAGCGCAAAATGCCATAAGTACC | 60  |
| PB1 245626 Method K | 1   | ATGGATGTCAATCCGACTTTACTTTTCTTAAAAGTGCCAGCGCAAAATGCCATAAGTACC | 60  |
| PB1 245626 Method N | 1   | ATGGATGTCAATCCGACTTTACTTTTCTTAAAAGTGCCAGCGCAAAATGCCATAAGTACC | 60  |
|                     |     |                                                              |     |
| PB1 245625 MiSeq    | 61  | ACATTCCCTTATACTGGAGATCCTCCATACAGCCATGGAACAGGGACAGGATACACAATG | 120 |
| PB1 245626 Method A | 61  | ACATTCCCTTATACTGGAGATCCTCCATACAGCCATGGAACAGGGACAGGATACACAATG | 120 |
| PB1 245626 Method E | 61  | ACATTCCCTTATACTGGAGATCCTCCATACAGCCATGGAACAGGGACAGGATACACAATG | 120 |
| PB1 245626 Method K | 61  | ACATTCCCTTATACTGGAGATCCTCCATACAGCCATGGAACAGGGACAGGATACACAATG | 120 |
| PB1 245626 Method N | 61  | ACATTCCCTTATACTGGAGATCCTCCATACAGCCATGGAACAGGGACAGGATACACAATG | 120 |
|                     |     |                                                              |     |
| PB1 245625 MiSeq    | 121 | GACACAGTCAACAGAACACATCAATACTCAGAGAAGGGAAAATGGACAACAAACACAGAA | 180 |
| PB1 245626 Method A | 121 | GACACAGTCAACAGAACACATCAATACTCAGAGAAGGGAAAATGGACAACAAACACAGAA | 180 |
| PB1 245626 Method E | 121 | GACACAGTCAACAGAACACATCAATACTCAGAGAAGGGAAAATGGACAACAAACACAGAA | 180 |
| PB1 245626 Method K | 121 | GACACAGTCAACAGAACACATCAATACTCAGAGAAGGGAAAATGGACAACAAACACAGAA | 180 |
| PB1 245626 Method N | 121 | GACACAGTCAACAGAACACATCAATACTCAGAGAAGGGAAAATGGACAACAAACACAGAA | 180 |
|                     |     |                                                              |     |
| PB1 245625 MiSeq    | 181 | ACCGGAGCACCTCAACTCAACCCAATTGATGGACCACTACCTGAGGACAACGAACCGAGC | 240 |
| PB1 245626 Method A | 181 | ACCGGAGCACCTCAACTCAACCCAATTGATGGACCACTACCTGAGGACAACGAACCGAGC | 240 |
| PB1 245626 Method E | 181 | ACCGGAGCACCTCAACTCAACCCAATTGATGGACCACTACCTGAGGACAACGAACCGAGC | 240 |
| PB1 245626 Method K | 181 | ACCGGAGCACCTCAACTCAACCCAATTGATGGACCACTACCTGAGGACAACGAACCGAGC | 240 |
| PB1 245626 Method N | 181 | ACCGGAGCACCTCAACTCAACCCAATTGATGGACCACTACCTGAGGACAACGAACCGAGC | 240 |
|                     |     |                                                              |     |
| PB1 245625 MiSeq    | 241 | GGATATGCACAAACAGATTGCGTGTTGGAAGCAATGGCTTTCCTTGAAGAGTCCCACCCA | 300 |
| PB1 245626 Method A | 241 | GGATATGCACAAACAGATTGCGTGTTGGAAGCAATGGCTTTCCTTGAAGAGTCCCACCCA | 300 |
| PB1 245626 Method E | 241 | GGATATGCACAAACAGATTGCGTGTTGGAAGCAATGGCTTTCCTTGAAGAGTCCCACCCA | 300 |
| PB1 245626 Method K | 241 | GGATATGCACAAACAGATTGCGTGTTGGAAGCAATGGCTTTCCTTGAAGAGTCCCACCCA | 300 |
| PB1 245626 Method N | 241 | GGATATGCACAAACAGATTGCGTGTTGGAAGCAATGGCTTTCCTTGAAGAGTCCCACCCA | 300 |

|                     |     |                                                               |     |
|---------------------|-----|---------------------------------------------------------------|-----|
| PB1 245625 MiSeq    | 301 | GGGATCTTTGGAAACTCTTGTCTTGAAACGATGGAAGTCGTTTCAGCAAACAAGAGTGGAC | 360 |
| PB1 245626 Method A | 301 | GGGATCTTTGGAAACTCTTGTCTTGAAACGATGGAAGTCGTTTCAGCAAACAAGAGTGGAC | 360 |
| PB1 245626 Method E | 301 | GGGATCTTTGGAAACTCTTGTCTTGAAACGATGGAAGTCGTTTCAGCAAACAAGAGTGGAC | 360 |
| PB1 245626 Method K | 301 | GGGATCTTTGGAAACTCTTGTCTTGAAACGATGGAAGTCGTTTCAGCAAACAAGAGTGGAC | 360 |
| PB1 245626 Method N | 301 | GGGATCTTTGGAAACTCTTGTCTTGAAACGATGGAAGTCGTTTCAGCAAACAAGAGTGGAC | 360 |
|                     |     |                                                               |     |
| PB1 245625 MiSeq    | 361 | AAACTAACTCAAGGTCGCCAGACTTATGACTGGACACTGAATAGAAACCAACCAGCTGCA  | 420 |
| PB1 245626 Method A | 361 | AAACTAACTCAAGGTCGCCAGACTTATGACTGGACACTGAATAGAAACCAACCAGCTGCA  | 420 |
| PB1 245626 Method E | 361 | AAACTAACTCAAGGTCGCCAGACTTATGACTGGACACTGAATAGAAACCAACCAGCTGCA  | 420 |
| PB1 245626 Method K | 361 | AAACTAACTCAAGGTCGCCAGACTTATGACTGGACACTGAATAGAAACCAACCAGCTGCA  | 420 |
| PB1 245626 Method N | 361 | AAACTAACTCAAGGTCGCCAGACTTATGACTGGACACTGAATAGAAACCAACCAGCTGCA  | 420 |
|                     |     |                                                               |     |
| PB1 245625 MiSeq    | 421 | ACTGCCCTGGCCAACACTATAGAGGTCTTCAGATCAAACGGTCTAACAGCCAATGAATCG  | 480 |
| PB1 245626 Method A | 421 | ACTGCCCTGGCCAACACTATAGAGGTCTTCAGATCAAACGGTCTAACAGCCAATGAATCG  | 480 |
| PB1 245626 Method E | 421 | ACTGCCCTGGCCAACACTATAGAGGTCTTCAGATCAAACGGTCTAACAGCCAATGAATCG  | 480 |
| PB1 245626 Method K | 421 | ACTGCCCTGGCCAACACTATAGAGGTCTTCAGATCAAACGGTCTAACAGCCAATGAATCG  | 480 |
| PB1 245626 Method N | 421 | ACTGCCCTGGCCAACACTATAGAGGTCTTCAGATCAAACGGTCTAACAGCCAATGAATCG  | 480 |
|                     |     |                                                               |     |
| PB1 245625 MiSeq    | 481 | GGGAGACTAATAGATTTTCCTCAAGGACGTGATGGACTCAATGGATACAGAAGAAATGGAA | 540 |
| PB1 245626 Method A | 481 | GGGAGACTAATAGATTTTCCTCAAGGACGTGATGGACTCAATGGATACAGAAGAAATGGAA | 540 |
| PB1 245626 Method E | 481 | GGGAGACTAATAGATTTTCCTCAAGGACGTGATGGACTCAATGGATACAGAAGAAATGGAA | 540 |
| PB1 245626 Method K | 481 | GGGAGACTAATAGATTTTCCTCAAGGACGTGATGGACTCAATGGATACAGAAGAAATGGAA | 540 |
| PB1 245626 Method N | 481 | GGGAGACTAATAGATTTTCCTCAAGGACGTGATGGACTCAATGGATACAGAAGAAATGGAA | 540 |
|                     |     |                                                               |     |
| PB1 245625 MiSeq    | 541 | ATAACAACACATTTCCAGAGAAAAGAGAAGAGTAAGGGACAACATGACCAAGAAAATGGTC | 600 |
| PB1 245626 Method A | 541 | ATAACAACACATTTCCAGAGAAAAGAGAAGAGTAAGGGACAACATGACCAAGAAAATGGTC | 600 |
| PB1 245626 Method E | 541 | ATAACAACACATTTCCAGAGAAAAGAGAAGAGTAAGGGACAACATGACCAAGAAAATGGTC | 600 |
| PB1 245626 Method K | 541 | ATAACAACACATTTCCAGAGAAAAGAGAAGAGTAAGGGACAACATGACCAAGAAAATGGTC | 600 |
| PB1 245626 Method N | 541 | ATAACAACACATTTCCAGAGAAAAGAGAAGAGTAAGGGACAACATGACCAAGAAAATGGTC | 600 |

|                     |     |                                                               |     |
|---------------------|-----|---------------------------------------------------------------|-----|
| PB1 245625 MiSeq    | 601 | ACACAAAGAACAATAGGAAAGAAGAAACAAAGGCTAAACAAGAGGAGCTACTTAATAAGA  | 660 |
| PB1 245626 Method A | 601 | ACACAAAGAACAATAGGAAAGAAGAAACAAAGGCTAAACAAGAGGAGCTACTTAATAAGA  | 660 |
| PB1 245626 Method E | 601 | ACACAAAGAACAATAGGAAAGAAGAAACAAAGGCTAAACAAGAGGAGCTACTTAATAAGA  | 660 |
| PB1 245626 Method K | 601 | ACACAAAGAACAATAGGAAAGAAGAAACAAAGGCTAAACAAGAGGAGCTACTTAATAAGA  | 660 |
| PB1 245626 Method N | 601 | ACACAAAGAACAATAGGAAAGAAGAAACAAAGGCTAAACAAGAGGAGCTACTTAATAAGA  | 660 |
|                     |     |                                                               |     |
| PB1 245625 MiSeq    | 661 | GCACTGACACTGAATACAATGACAAAAGATGCAGAAAGAGGCAAATTGAAGAGACGGGCG  | 720 |
| PB1 245626 Method A | 661 | GCACTGACACTGAATACAATGACAAAAGATGCAGAAAGAGGCAAATTGAAGAGACGGGCG  | 720 |
| PB1 245626 Method E | 661 | GCACTGACACTGAATACAATGACAAAAGATGCAGAAAGAGGCAAATTGAAGAGACGGGCG  | 720 |
| PB1 245626 Method K | 661 | GCACTGACACTGAATACAATGACAAAAGATGCAGAAAGAGGCAAATTGAAGAGACGGGCG  | 720 |
| PB1 245626 Method N | 661 | GCACTGACACTGAATACAATGACAAAAGATGCAGAAAGAGGCAAATTGAAGAGACGGGCG  | 720 |
|                     |     |                                                               |     |
| PB1 245625 MiSeq    | 721 | ATTGCAACACCAGGGATGCAGATTAGAGGATTTGTGTACTTTGTCTGAAACACTGGCAAGG | 780 |
| PB1 245626 Method A | 721 | ATTGCAACACCAGGGATGCAGATTAGAGGATTTGTGTACTTTGTCTGAAACACTGGCAAGG | 780 |
| PB1 245626 Method E | 721 | ATTGCAACACCAGGGATGCAGATTAGAGGATTTGTGTACTTTGTCTGAAACACTGGCAAGG | 780 |
| PB1 245626 Method K | 721 | ATTGCAACACCAGGGATGCAGATTAGAGGATTTGTGTACTTTGTCTGAAACACTGGCAAGG | 780 |
| PB1 245626 Method N | 721 | ATTGCAACACCAGGGATGCAGATTAGAGGATTTGTGTACTTTGTCTGAAACACTGGCAAGG | 780 |
|                     |     |                                                               |     |
| PB1 245625 MiSeq    | 781 | AGCATCTGTGAAAAAATTGAGCAATCTGGACTCCCCGTTGGAGGAAATGAGAAGAAGGCT  | 840 |
| PB1 245626 Method A | 781 | AGCATCTGTGAAAAAATTGAGCAATCTGGACTCCCCGTTGGAGGAAATGAGAAGAAGGCT  | 840 |
| PB1 245626 Method E | 781 | AGCATCTGTGAAAAAATTGAGCAATCTGGACTCCCCGTTGGAGGAAATGAGAAGAAGGCT  | 840 |
| PB1 245626 Method K | 781 | AGCATCTGTGAAAAAATTGAGCAATCTGGACTCCCCGTTGGAGGAAATGAGAAGAAGGCT  | 840 |
| PB1 245626 Method N | 781 | AGCATCTGTGAAAAAATTGAGCAATCTGGACTCCCCGTTGGAGGAAATGAGAAGAAGGCT  | 840 |
|                     |     |                                                               |     |
| PB1 245625 MiSeq    | 841 | AAATTGGCAAATGTCGTGAGGAAAAATGATGACTAACTCACAAGATACAGAGCTCTCCTTC | 900 |
| PB1 245626 Method A | 841 | AAATTGGCAAATGTCGTGAGGAAAAATGATGACTAACTCACAAGATACAGAGCTCTCCTTC | 900 |
| PB1 245626 Method E | 841 | AAATTGGCAAATGTCGTGAGGAAAAATGATGACTAACTCACAAGATACAGAGCTCTCCTTC | 900 |
| PB1 245626 Method K | 841 | AAATTGGCAAATGTCGTGAGGAAAAATGATGACTAACTCACAAGATACAGAGCTCTCCTTC | 900 |
| PB1 245626 Method N | 841 | AAATTGGCAAATGTCGTGAGGAAAAATGATGACTAACTCACAAGATACAGAGCTCTCCTTC | 900 |

|                            |     |                                                                |     |
|----------------------------|-----|----------------------------------------------------------------|-----|
| <b>PB1 245625 MiSeq</b>    | 901 | ACAATTACTGGAGATAACACAAAAATGGAATGAGAATCAAAAATCCTCGGATGTTTCTGGCA | 960 |
| <b>PB1 245626 Method A</b> | 901 | ACAATTACTGGAGATAACACAAAAATGGAATGAGAATCAAAAATCCTCGGATGTTTCTGGCA | 960 |
| <b>PB1 245626 Method E</b> | 901 | ACAATTACTGGAGATAACACAAAAATGGAATGAGAATCAAAAATCCTCGGATGTTTCTGGCA | 960 |
| <b>PB1 245626 Method K</b> | 901 | ACAATTACTGGAGATAACACAAAAATGGAATGAGAATCAAAAATCCTCGGATGTTTCTGGCA | 960 |
| <b>PB1 245626 Method N</b> | 901 | ACAATTACTGGAGATAACACAAAAATGGAATGAGAATCAAAAATCCTCGGATGTTTCTGGCA | 960 |

|                            |     |                                                              |      |
|----------------------------|-----|--------------------------------------------------------------|------|
| <b>PB1 245625 MiSeq</b>    | 961 | ATGATAACGTACATTACAAGAAACCAACCTGAATGGTTTAGAAATGTCTTGAGTATTGCC | 1020 |
| <b>PB1 245626 Method A</b> | 961 | ATGATAACGTACATTACAAGAAACCAACCTGAATGGTTTAGAAATGTCTTGAGTATTGCC | 1020 |
| <b>PB1 245626 Method E</b> | 961 | ATGATAACGTACATTACAAGAAACCAACCTGAATGGTTTAGAAATGTCTTGAGTATTGCC | 1020 |
| <b>PB1 245626 Method K</b> | 961 | ATGATAACGTACATTACAAGAAACCAACCTGAATGGTTTAGAAATGTCTTGAGTATTGCC | 1020 |
| <b>PB1 245626 Method N</b> | 961 | ATGATAACGTACATTACAAGAAACCAACCTGAATGGTTTAGAAATGTCTTGAGTATTGCC | 1020 |

|                            |      |                                                               |      |
|----------------------------|------|---------------------------------------------------------------|------|
| <b>PB1 245625 MiSeq</b>    | 1021 | CCTATAATGTTCTCGAACAAAAATGGCGAGATTGGGAAAAGGGTACATGTTTGAAAGTAAG | 1080 |
| <b>PB1 245626 Method A</b> | 1021 | CCTATAATGTTCTCGAACAAAAATGGCGAGATTGGGAAAAGGGTACATGTTTGAAAGTAAG | 1080 |
| <b>PB1 245626 Method E</b> | 1021 | CCTATAATGTTCTCGAACAAAAATGGCGAGATTGGGAAAAGGGTACATGTTTGAAAGTAAG | 1080 |
| <b>PB1 245626 Method K</b> | 1021 | CCTATAATGTTCTCGAACAAAAATGGCGAGATTGGGAAAAGGGTACATGTTTGAAAGTAAG | 1080 |
| <b>PB1 245626 Method N</b> | 1021 | CCTATAATGTTCTCGAACAAAAATGGCGAGATTGGGAAAAGGGTACATGTTTGAAAGTAAG | 1080 |

|                            |      |                                                              |      |
|----------------------------|------|--------------------------------------------------------------|------|
| <b>PB1 245625 MiSeq</b>    | 1081 | AGCATGAAGTTACGGACACAAATACCTGCAGAAATACTTGCAAACATTGACTTAAAATAC | 1140 |
| <b>PB1 245626 Method A</b> | 1081 | AGCATGAAGTTACGGACACAAATACCTGCAGAAATACTTGCAAACATTGACTTAAAATAC | 1140 |
| <b>PB1 245626 Method E</b> | 1081 | AGCATGAAGTTACGGACACAAATACCTGCAGAAATACTTGCAAACATTGACTTAAAATAC | 1140 |
| <b>PB1 245626 Method K</b> | 1081 | AGCATGAAGTTACGGACACAAATACCTGCAGAAATACTTGCAAACATTGACTTAAAATAC | 1140 |
| <b>PB1 245626 Method N</b> | 1081 | AGCATGAAGTTACGGACACAAATACCTGCAGAAATACTTGCAAACATTGACTTAAAATAC | 1140 |

|                            |      |                                                               |      |
|----------------------------|------|---------------------------------------------------------------|------|
| <b>PB1 245625 MiSeq</b>    | 1141 | TTCAATGAATCAACAAGAAAGAAAAATCGAAAAAATAAGGCCTCTACTAATAGATGGCACT | 1200 |
| <b>PB1 245626 Method A</b> | 1141 | TTCAATGAATCAACAAGAAAGAAAAATCGAAAAAATAAGGCCTCTACTAATAGATGGCACT | 1200 |
| <b>PB1 245626 Method E</b> | 1141 | TTCAATGAATCAACAAGAAAGAAAAATCGAAAAAATAAGGCCTCTACTAATAGATGGCACT | 1200 |
| <b>PB1 245626 Method K</b> | 1141 | TTCAATGAATCAACAAGAAAGAAAAATCGAAAAAATAAGGCCTCTACTAATAGATGGCACT | 1200 |
| <b>PB1 245626 Method N</b> | 1141 | TTCAATGAATCAACAAGAAAGAAAAATCGAAAAAATAAGGCCTCTACTAATAGATGGCACT | 1200 |

|                            |      |                                                              |      |
|----------------------------|------|--------------------------------------------------------------|------|
| <b>PB1 245625 MiSeq</b>    | 1201 | GCCTCATTGAGTCCTGGAATGATGATGGGCATGTTCAATATGCTGAGTACAGTATTAGGA | 1260 |
| <b>PB1 245626 Method A</b> | 1201 | GCCTCATTGAGTCCTGGAATGATGATGGGCATGTTCAATATGCTGAGTACAGTATTAGGA | 1260 |
| <b>PB1 245626 Method E</b> | 1201 | GCCTCATTGAGTCCTGGAATGATGATGGGCATGTTCAATATGCTGAGTACAGTATTAGGA | 1260 |
| <b>PB1 245626 Method K</b> | 1201 | GCCTCATTGAGTCCTGGAATGATGATGGGCATGTTCAATATGCTGAGTACAGTATTAGGA | 1260 |
| <b>PB1 245626 Method N</b> | 1201 | GCCTCATTGAGTCCTGGTATGATGATGGGCATGTTCAATATGCTGAGTACAGTATTAGGA | 1260 |

|                            |      |                                                               |      |
|----------------------------|------|---------------------------------------------------------------|------|
| <b>PB1 245625 MiSeq</b>    | 1261 | GTTTCAATCCTAAATCTTGGGCAAAAAGAGGTACACCAAAACCACATACTGGTGGGATGGA | 1320 |
| <b>PB1 245626 Method A</b> | 1261 | GTTTCAATCCTAAATCTTGGGCAAAAAGAGGTACACCAAAACCACATACTGGTGGGATGGA | 1320 |
| <b>PB1 245626 Method E</b> | 1261 | GTTTCAATCCTAAATCTTGGGCAAAAAGAGGTACACCAAAACCACATACTGGTGGGATGGA | 1320 |
| <b>PB1 245626 Method K</b> | 1261 | GTTTCAATCCTAAATCTTGGGCAAAAAGAGGTACACCAAAACCACATACTGGTGGGATGGA | 1320 |
| <b>PB1 245626 Method N</b> | 1261 | GTTTCAATCCTAAATCTTGGGCAAAAAGAGGTACACCAAAACCACATACTGGTGGGATGGA | 1320 |

|                            |      |                                                               |      |
|----------------------------|------|---------------------------------------------------------------|------|
| <b>PB1 245625 MiSeq</b>    | 1321 | CTCCAATCCTCTGATGATTTTCGCCCTCATAGTAAATGCACCTAATCATGAGGGAATACAA | 1380 |
| <b>PB1 245626 Method A</b> | 1321 | CTCCAATCCTCTGATGATTTTCGCCCTCATAGTAAATGCACCTAATCATGAGGGAATACAA | 1380 |
| <b>PB1 245626 Method E</b> | 1321 | CTCCAATCCTCTGATGATTTTCGCCCTCATAGTAAATGCACCTAATCATGAGGGAATACAA | 1380 |
| <b>PB1 245626 Method K</b> | 1321 | CTCCAATCCTCTGATGATTTTCGCCCTCATAGTAAATGCACCTAATCATGAGGGAATACAA | 1380 |
| <b>PB1 245626 Method N</b> | 1321 | CTCCAATCCTCTGATGATTTTCGCCCTCATAGTAAATGCACCTAATCATGAGGGAATACAA | 1380 |

|                            |      |                                                               |      |
|----------------------------|------|---------------------------------------------------------------|------|
| <b>PB1 245625 MiSeq</b>    | 1381 | GCAGGAGTGGATAGGTTCTATAGGACCTGCAAACCTGGTCGGGATCAATATGAGCAAAAAG | 1440 |
| <b>PB1 245626 Method A</b> | 1381 | GCAGGAGTGGATAGGTTCTATAGGACCTGCAAACCTGGTCGGGATCAATATGAGCAAAAAG | 1440 |
| <b>PB1 245626 Method E</b> | 1381 | GCAGGAGTGGATAGGTTCTATAGGACCTGCAAACCTGGTCGGGATCAATATGAGCAAAAAG | 1440 |
| <b>PB1 245626 Method K</b> | 1381 | GCAGGAGTGGATAGGTTCTATAGGACCTGCAAACCTGGTCGGGATCAATATGAGCAAAAAG | 1440 |
| <b>PB1 245626 Method N</b> | 1381 | GCAGGAGTGGATAGGTTCTATAGGACCTGCAAACCTGGTCGGGATCAATATGAGCAAAAAG | 1440 |

|                            |      |                                                               |      |
|----------------------------|------|---------------------------------------------------------------|------|
| <b>PB1 245625 MiSeq</b>    | 1441 | AAGTCTTACATAAAACCGGACTGGAACATTTGAGTTCACAAGCTTTTTCTATCGCTATGGA | 1500 |
| <b>PB1 245626 Method A</b> | 1441 | AAGTCTTACATAAAACCGGACTGGAACATTTGAGTTCACAAGCTTTTTCTATCGCTATGGA | 1500 |
| <b>PB1 245626 Method E</b> | 1441 | AAGTCTTACATAAAACCGGACTGGAACATTTGAGTTCACAAGCTTTTTCTATCGCTATGGA | 1500 |
| <b>PB1 245626 Method K</b> | 1441 | AAGTCTTACATAAAACCGGACTGGAACATTTGAGTTCACAAGCTTTTTCTATCGCTATGGA | 1500 |
| <b>PB1 245626 Method N</b> | 1441 | AAGTCTTACATAAAACCGGACTGGAACATTTGAGTTCACAAGCTTTTTCTATCGCTATGGA | 1500 |

|                     |      |                                                              |      |
|---------------------|------|--------------------------------------------------------------|------|
| PB1 245625 MiSeq    | 1501 | TTTGTGGCTAACTTCAGTATGGAGCTGCCCAGCTTTGGAGTTTCTGGGATCAATGAATCA | 1560 |
| PB1 245626 Method A | 1501 | TTTGTGGCTAACTTCAGTATGGAGCTGCCCAGCTTTGGAGTTTCTGGGATCAATGAATCA | 1560 |
| PB1 245626 Method E | 1501 | TTTGTGGCTAACTTCAGTATGGAGCTGCCCAGCTTTGGAGTTTCTGGGATCAATGAATCA | 1560 |
| PB1 245626 Method K | 1501 | TTTGTGGCTAACTTCAGTATGGAGCTGCCCAGCTTTGGAGTTTCTGGGATCAATGAATCA | 1560 |
| PB1 245626 Method N | 1501 | TTTGTGGCTAACTTCAGTATGGAGCTGCCCAGCTTTGGAGTTTCTGGGATCAATGAATCA | 1560 |

|                     |      |                                                              |      |
|---------------------|------|--------------------------------------------------------------|------|
| PB1 245625 MiSeq    | 1561 | GCTGACATGAGCATTGGCGTCACAGTGATAAAAAACAACATGATAAACAATGACCTTGGT | 1620 |
| PB1 245626 Method A | 1561 | GCTGACATGAGCATTGGCGTCACAGTGATAAAAAACAACATGATAAACAATGACCTTGGT | 1620 |
| PB1 245626 Method E | 1561 | GCTGACATGAGCATTGGCGTCACAGTGATAAAAAACAACATGATAAACAATGACCTTGGT | 1620 |
| PB1 245626 Method K | 1561 | GCTGACATGAGCATTGGCGTCACAGTGATAAAAAACAACATGATAAACAATGACCTTGGT | 1620 |
| PB1 245626 Method N | 1561 | GCTGACATGAGCATTGGCGTCACAGTGATAAAAAACAACATGATAAACAATGACCTTGGT | 1620 |

|                     |      |                                                               |      |
|---------------------|------|---------------------------------------------------------------|------|
| PB1 245625 MiSeq    | 1621 | CCAGCAACAGCTCAAATGGCCCTTCAACTATTTCATCAAAGATTACAGGTACACGTACCGA | 1680 |
| PB1 245626 Method A | 1621 | CCAGCAACAGCTCAAATGGCCCTTCAACTATTTCATCAAAGATTACAGGTACACGTACCGA | 1680 |
| PB1 245626 Method E | 1621 | CCAGCAACAGCTCAAATGGCCCTTCAACTATTTCATCAAAGATTACAGGTACACGTACCGA | 1680 |
| PB1 245626 Method K | 1621 | CCAGCAACAGCTCAAATGGCCCTTCAACTATTTCATCAAAGATTACAGGTACACGTACCGA | 1680 |
| PB1 245626 Method N | 1621 | CCAGCAACAGCTCAAATGGCCCTTCAACTATTTCATCAAAGATTACAGGTACACGTACCGA | 1680 |

|                     |      |                                                               |      |
|---------------------|------|---------------------------------------------------------------|------|
| PB1 245625 MiSeq    | 1681 | TGCCACAGAGGTGACACACAAATTCAAACGAGGAGATCATTTCGAGCTGAAGAAGCTGTGG | 1740 |
| PB1 245626 Method A | 1681 | TGCCACAGAGGTGACACACAAATTCAAACGAGGAGATCATTTCGAGCTGAAGAAGCTGTGG | 1740 |
| PB1 245626 Method E | 1681 | TGCCACAGAGGTGACACACAAATTCAAACGAGGAGATCATTTCGAGCTGAAGAAGCTGTGG | 1740 |
| PB1 245626 Method K | 1681 | TGCCACAGAGGTGACACACAAATTCAAACGAGGAGATCATTTCGAGCTGAAGAAGCTGTGG | 1740 |
| PB1 245626 Method N | 1681 | TGCCACAGAGGTGACACACAAATTCAAACGAGGAGATCATTTCGAGCTGAAGAAGCTGTGG | 1740 |

|                     |      |                                                            |      |
|---------------------|------|------------------------------------------------------------|------|
| PB1 245625 MiSeq    | 1741 | GAACAGACCCGTTCAAAGGCAGGACTGTTGGTGTGATGGAGGACCAAATCTATACAAC | 1800 |
| PB1 245626 Method A | 1741 | GAACAGACCCGTTCAAAGGCAGGACTGTTGGTGTGATGGAGGACCAAATCTATACAAC | 1800 |
| PB1 245626 Method E | 1741 | GAACAGACCCGTTCAAAGGCAGGACTGTTGGTGTGATGGAGGACCAAATCTATACAAC | 1800 |
| PB1 245626 Method K | 1741 | GAACAGACCCGTTCAAAGGCAGGACTGTTGGTGTGATGGAGGACCAAATCTATACAAC | 1800 |
| PB1 245626 Method N | 1741 | GAACAGACCCGTTCAAAGGCAGGACTGTTGGTGTGATGGAGGACCAAATCTATACAAC | 1800 |

|                            |      |                                                               |      |
|----------------------------|------|---------------------------------------------------------------|------|
| <b>PB1 245625 MiSeq</b>    | 1801 | ATTTCGGAATCTCCATATCCCAGAGGTCTGCCTGAAGTGGGAGCTGATGGACGAAGATTAC | 1860 |
| <b>PB1 245626 Method A</b> | 1801 | ATTTCGGAATCTCCATATCCCAGAGGTCTGCCTGAAGTGGGAGCTGATGGACGAAGATTAC | 1860 |
| <b>PB1 245626 Method E</b> | 1801 | ATTTCGGAATCTCCATATCCCAGAGGTCTGCCTGAAGTGGGAGCTGATGGACGAAGATTAC | 1860 |
| <b>PB1 245626 Method K</b> | 1801 | ATTTCGGAATCTCCATATCCCAGAGGTCTGCCTGAAGTGGGAGCTGATGGACGAAGATTAC | 1860 |
| <b>PB1 245626 Method N</b> | 1801 | ATTTCGGAATCTCCATATCCCAGAGGTCTGCCTGAAGTGGGAGCTGATGGACGAAGATTAC | 1860 |

|                            |      |                                                                |      |
|----------------------------|------|----------------------------------------------------------------|------|
| <b>PB1 245625 MiSeq</b>    | 1861 | CAGGGCAGGTTGTGTAATCCTCTGAACCCATTTGTCAGTCATAAAGAAATTGAGTCCGTA   | 1920 |
| <b>PB1 245626 Method A</b> | 1861 | CAGGGCAGGTTGTGTAATCCTCTGAACCCATTTGTCAGTCATAAAGAAATTGAGTCCGTA   | 1920 |
| <b>PB1 245626 Method E</b> | 1861 | CAGGGCAGGTTGTGTAATCCTCTGAACCCATTTGTCAGTCATAAAGAAATTGAGTCCGTA   | 1920 |
| <b>PB1 245626 Method K</b> | 1861 | CAGGGCAGGTTGTGTAATCCTCTGAACCCATTTGTCAGTCATAAAGAAATTGAGTCCGTA   | 1920 |
| <b>PB1 245626 Method N</b> | 1861 | CAGGGCAGGTTGTGTAATCTTCTCTGAACCCATTTGTCAGTCATAAAGAAATTGAGTCCGTA | 1920 |

|                            |      |                                                              |      |
|----------------------------|------|--------------------------------------------------------------|------|
| <b>PB1 245625 MiSeq</b>    | 1921 | AACAATGCTGTGGTGATGCCAGCACACGGTCCAGCCAAAAGCATGGAATATGATGCCATT | 1980 |
| <b>PB1 245626 Method A</b> | 1921 | AACAATGCTGTGGTGATGCCAGCACACGGTCCAGCCAAAAGCATGGAATATGATGCCATT | 1980 |
| <b>PB1 245626 Method E</b> | 1921 | AACAATGCTGTGGTGATGCCAGCACACGGTCCAGCCAAAAGCATGGAATATGATGCCATT | 1980 |
| <b>PB1 245626 Method K</b> | 1921 | AACAATGCTGTGGTGATGCCAGCACACGGTCCAGCCAAAAGCATGGAATATGATGCCATT | 1980 |
| <b>PB1 245626 Method N</b> | 1921 | AACAATGCTGTGGTGATGCCAGCACACGGTCCAGCCAAAAGCATGGAATATGATGCCATT | 1980 |

|                            |      |                                                               |      |
|----------------------------|------|---------------------------------------------------------------|------|
| <b>PB1 245625 MiSeq</b>    | 1981 | GCGACTACACACTCATGGATTCCCTAAAAGGAATCGTTCCATTCTCAATACCAGTCAAAGG | 2040 |
| <b>PB1 245626 Method A</b> | 1981 | GCGACTACACACTCATGGATTCCCTAAAAGGAATCGTTCCATTCTCAATACCAGTCAAAGG | 2040 |
| <b>PB1 245626 Method E</b> | 1981 | GCGACTACACACTCATGGATTCCCTAAAAGGAATCGTTCCATTCTCAATACCAGTCAAAGG | 2040 |
| <b>PB1 245626 Method K</b> | 1981 | GCGACTACACACTCATGGATTCCCTAAAAGGAATCGTTCCATTCTCAATACCAGTCAAAGG | 2040 |
| <b>PB1 245626 Method N</b> | 1981 | GCGACTACACACTCATGGATTCCCTAAAAGGAATCGTTCCATTCTCAATACCAGTCAAAGG | 2040 |

|                            |      |                                                               |      |
|----------------------------|------|---------------------------------------------------------------|------|
| <b>PB1 245625 MiSeq</b>    | 2041 | GGAATTCTTGAGGATGAACAGATGTACCAGAAATGCTGCAGTCTATTTCGAAAAATTTTTT | 2100 |
| <b>PB1 245626 Method A</b> | 2041 | GGAATTCTTGAGGATGAACAGATGTACCAGAAATGCTGCAGTCTATTTCGAAAAATTTTTT | 2100 |
| <b>PB1 245626 Method E</b> | 2041 | GGAATTCTTGAGGATGAACAGATGTACCAGAAATGCTGCAGTCTATTTCGAAAAATTTTTT | 2100 |
| <b>PB1 245626 Method K</b> | 2041 | GGAATTCTTGAGGATGAACAGATGTACCAGAAATGCTGCAGTCTATTTCGAAAAATTTTTT | 2100 |
| <b>PB1 245626 Method N</b> | 2041 | GGAATTCTTGAGGATGAACAGATGTACCAGAAATGCTGCAGTCTATTTCGAAAAATTTTTT | 2100 |

|                            |      |                                                              |      |
|----------------------------|------|--------------------------------------------------------------|------|
| <b>PB1 245625 MiSeq</b>    | 2101 | CCCAGTAGTTCATACAGGAGACCAGTTGGAATTTCCAGCATGGTGGAGGCCATGGTGTCT | 2160 |
| <b>PB1 245626 Method A</b> | 2101 | CCCAGTAGTTCATACAGGAGACCAGTTGGAATTTCCAGCATGGTGGAGGCCATGGTGTCT | 2160 |
| <b>PB1 245626 Method E</b> | 2101 | CCCAGTAGTTCATACAGGAGACCAGTTGGAATTTCCAGCATGGTGGAGGCCATGGTGTCT | 2160 |
| <b>PB1 245626 Method K</b> | 2101 | CCCAGTAGTTCATACAGGAGACCAGTTGGAATTTCCAGCATGGTGGAGGCCATGGTGTCT | 2160 |
| <b>PB1 245626 Method N</b> | 2101 | CCCAGTAGTTCATACAGGAGACCAGTTGGAATTTCCAGCATGGTGGAGGCCATGGTGTCT | 2160 |

|                            |      |                                                              |      |
|----------------------------|------|--------------------------------------------------------------|------|
| <b>PB1 245625 MiSeq</b>    | 2161 | AGGGCCCGAATCGATGCACGCATTGATTTTCAATCTGGAAGGATCAAGAAGGGAGAGTTT | 2220 |
| <b>PB1 245626 Method A</b> | 2161 | AGGGCCCGAATCGATGCACGCATTGATTTTCAATCTGGAAGGATCAAGAAGGGAGAGTTT | 2220 |
| <b>PB1 245626 Method E</b> | 2161 | AGGGCCCGAATCGATGCACGCATTGATTTTCAATCTGGAAGGATCAAGAAGGGAGAGTTT | 2220 |
| <b>PB1 245626 Method K</b> | 2161 | AGGGCCCGAATCGATGCACGCATTGATTTTCAATCTGGAAGGATCAAGAAGGGAGAGTTT | 2220 |
| <b>PB1 245626 Method N</b> | 2161 | AGGGCCCGAATCGATGCACGCATTGATTTTCAATCTGGAAGGATCAAGAAGGGAGAGTTT | 2220 |

|                            |      |                                                        |      |
|----------------------------|------|--------------------------------------------------------|------|
| <b>PB1 245625 MiSeq</b>    | 2221 | TCTGAGATCATGAAGATCTGTTCCACCATTGAAGAGCTCAGACGGCAAAAATAG | 2274 |
| <b>PB1 245626 Method A</b> | 2221 | TCTGAGATCATGAAGATCTGTTCCACCATTGAAGAGCTCAGACGGCAAAAATAG | 2274 |
| <b>PB1 245626 Method E</b> | 2221 | TCTGAGATCATGAAGATCTGTTCCACCATTGAAGAGCTCAGACGGCAAAAATAG | 2274 |
| <b>PB1 245626 Method K</b> | 2221 | TCTGAGATCATGAAGATCTGTTCCACCATTGAAGAGCTCAGACGGCAAAAATAG | 2274 |
| <b>PB1 245626 Method N</b> | 2221 | TCTGAGATCATGAAGATCTGTTCCACCATTGAAGAGCTCAGACGGCAAAAATAG | 2274 |
