# Supplementary material for: An Evaluation of Avian Influenza Virus Whole Genome Sequencing Approaches Using Nanopore Technology
Source: Preprints.org preprint supplement (doi:10.20944/preprints202301.0480.v1), 2023-01-26
Supplement: Supplementary file 38 [file supplementary]

## Formatted Alignments

|                    |   |                                                              |    |
|--------------------|---|--------------------------------------------------------------|----|
| PA 245467 MiSeq    | 1 | ATGGAAGACTTTATGCGACAATGCTTCAATCCAATGATTGTCGAGCTTGCGGAAAAAGCA | 60 |
| PA 245467 Method A | 1 | ATGGAAGACTTTATGCGACAATGCTTCAATCCAATGATTGTCGAGCTTGCGGAAAAAGCA | 60 |
| PA 245467 Method S | 1 | ATGGAAGACTTTATGCGACAATGCTTCAATCCAATGATTGTCGAGCTTGCGGAAAAAGCA | 60 |
| PA 245467 Method E | 1 | ATGGAAGACTTTATGCGACAATGCTTCAATCCAATGATTGTCGAGCTTGCGGAAAAAGCA | 60 |
| PA 245467 Method K | 1 | ATGGAAGACTTTATGCGACAATGCTTCAATCCAATGATTGTCGAGCTTGCGGAAAAAGCA | 60 |
| PA 245467 Method N | 1 | ATGGAAGACTTTATGCGACAATGCTTCAATCCAATGATTGTCGAGCTTGCGGAAAAAGCA | 60 |

|                    |    |                                                              |     |
|--------------------|----|--------------------------------------------------------------|-----|
| PA 245467 MiSeq    | 61 | ATGAAAGAATATGGGGAAGATCCGAAAATCGAGACAAACAAATTTGCCGCAATATGCACA | 120 |
| PA 245467 Method A | 61 | ATGAAAGAATATGGGGAAGATCCGAAAATCGAGACAAACAAATTTGCCGCAATATGCACA | 120 |
| PA 245467 Method S | 61 | ATGAAAGAATATGGGGAAGATCCGAAAATCGAGACAAACAAATTTGCCGCAATATGCACA | 120 |
| PA 245467 Method E | 61 | ATGAAAGAATATGGGGAAGATCCGAAAATCGAGACAAACAAATTTGCCGCAATATGCACA | 120 |
| PA 245467 Method K | 61 | ATGAAAGAATATGGGGAAGATCCGAAAATCGAGACAAACAAATTTGCCGCAATATGCACA | 120 |
| PA 245467 Method N | 61 | ATGAAAGAATATGGGGAAGATCCGAAAATCGAGACAAACAAATTTGCCGCAATATGCACA | 120 |

|                    |     |                                                              |     |
|--------------------|-----|--------------------------------------------------------------|-----|
| PA 245467 MiSeq    | 121 | CACCTAGAAGTCTGTTTCATGTATTCGGATTTCCATTTTATTGATGAACGAGGCGAATCA | 180 |
| PA 245467 Method A | 121 | CACCTAGAAGTCTGTTTCATGTATTCGGATTTCCATTTTATTGATGAACGAGGCGAATCA | 180 |
| PA 245467 Method S | 121 | CACCTAGAAGTCTGTTTCATGTATTCGGATTTCCATTTTATTGATGAACGAGGCGAATCA | 180 |
| PA 245467 Method E | 121 | CACCTAGAAGTCTGTTTCATGTATTCGGATTTCCATTTTATTGATGAACGAGGCGAATCA | 180 |
| PA 245467 Method K | 121 | CACCTAGAAGTCTGTTTCATGTATTCGGATTTCCATTTTATTGATGAACGAGGCGAATCA | 180 |
| PA 245467 Method N | 121 | CACCTAGAAGTCTGTTTCATGTATTCGGATTTCCATTTTATTGATGAACGAGGCGAATCA | 180 |

|                    |     |                                                              |     |
|--------------------|-----|--------------------------------------------------------------|-----|
| PA 245467 MiSeq    | 181 | ATGATTGTAGAATCTGGCGATCCAAATGCATTATTGAAACACCGATTTGAGATAATCGAA | 240 |
| PA 245467 Method A | 181 | ATGATTGTAGAATCTGGCGATCCAAATGCATTATTGAAACACCGATTTGAGATAATCGAA | 240 |
| PA 245467 Method S | 181 | ATGATTGTAGAATCTGGCGATCCAAATGCATTATTGAAACACCGATTTGAGATAATCGAA | 240 |
| PA 245467 Method E | 181 | ATGATTGTAGAATCTGGCGATCCAAATGCATTATTGAAACACCGATTTGAGATAATCGAA | 240 |
| PA 245467 Method K | 181 | ATGATTGTAGAATCTGGCGATCCAAATGCATTATTGAAACACCGATTTGAGATAATCGAA | 240 |
| PA 245467 Method N | 181 | ATGATTGTAGAATCTGGCGATCCAAATGCATTATTGAAACACCGATTTGAGATAATCGAA | 240 |

|                    |     |                                                               |     |
|--------------------|-----|---------------------------------------------------------------|-----|
| PA 245467 MiSeq    | 241 | GGGAGAGACCGAGCAATGGCCTGGACAGTGGTGAATAGTATCTGCAACACCACAGGGGGTC | 300 |
| PA 245467 Method A | 241 | GGGAGAGACCGAGCAATGGCCTGGACAGTGGTGAATAGTATCTGCAACACCACAGGGGGTC | 300 |
| PA 245467 Method S | 241 | GGGAGAGACCGAGCAATGGCCTGGACAGTGGTGAATAGTATCTGCAACACCACAGGAGTC  | 300 |
| PA 245467 Method E | 241 | GGGAGAGACCGAGCAATGGCCTGGACAGTGGTGAATAGTATCTGCAACACCACAGGGGGTC | 300 |
| PA 245467 Method K | 241 | GGGAGAGACCGAGCAATGGCCTGGACAGTGGTGAATAGTATCTGCAACACCACAGGGGGTC | 300 |
| PA 245467 Method N | 241 | GGGAGAGACCGAGCAATGGCCTGGACAGTGGTGAATAGTATCTGCAACACCACAGGGGGTC | 300 |

|                    |     |                                                                |     |
|--------------------|-----|----------------------------------------------------------------|-----|
| PA 245467 MiSeq    | 301 | GAAAAGCCCCAAATTCCTCCCTGATTTGTATGACTACAAAGAGAACCGATTTCATTGAAATT | 360 |
| PA 245467 Method A | 301 | GAAAAGCCCCAAATTCCTCCCTGATTTGTATGACTACAAAGAGAACCGATTTCATTGAAATT | 360 |
| PA 245467 Method S | 301 | GAAAAGCCCCAAATTCCTCCCTGATTTGTATGACTACAAAGAGAACCGATTTCATTGAAATT | 360 |
| PA 245467 Method E | 301 | GAAAAGCCCCAAATTCCTCCCTGATTTGTATGACTACAAAGAGAACCGATTTCATTGAAATT | 360 |
| PA 245467 Method K | 301 | GAAAAGCCCCAAATTCCTCCCTGATTTGTATGACTACAAAGAGAACCGATTTCATTGAAATT | 360 |
| PA 245467 Method N | 301 | GAAAAGCCCCAAATTCCTCCCTGATTTGTATGACTACAAAGAGAACCGATTTCATTGAAATT | 360 |

|                    |     |                                                               |     |
|--------------------|-----|---------------------------------------------------------------|-----|
| PA 245467 MiSeq    | 361 | GGAGTAACGCGAAGGGAAGTTCACATATACTATTTAGAAAAAGCCAACAAGATAAAAATCA | 420 |
| PA 245467 Method A | 361 | GGAGTAACGCGAAGGGAAGTTCACATATACTATTTAGAAAAAGCCAACAAGATAAAAATCA | 420 |
| PA 245467 Method S | 361 | GGAGTAACGCGAAGGGAAGTTCACATATACTATTTAGAAAAAGCCAACAAGATAAAAATCA | 420 |
| PA 245467 Method E | 361 | GGAGTAACGCGAAGGGAAGTTCACATATACTATTTAGAAAAAGCCAACAAGATAAAAATCA | 420 |
| PA 245467 Method K | 361 | GGAGTAACGCGAAGGGAAGTTCACATATACTATTTAGAAAAAGCCAACAAGATAAAAATCA | 420 |
| PA 245467 Method N | 361 | GGAGTAACGCGAAGGGAAGTTCACATATACTATTTAGAAAAAGCCAACAAGATAAAAATCA | 420 |

|                    |     |                                                               |     |
|--------------------|-----|---------------------------------------------------------------|-----|
| PA 245467 MiSeq    | 421 | GAGAAAACACATATTCACATATTCTCATTCACTGGAGAGGAAATGGCCACCAAGGCGGAC  | 480 |
| PA 245467 Method A | 421 | GAGAAAACACATATTCACATATTCTCATTCACTGGAGAGGAAATGGCCACCAAGGCGGAC  | 480 |
| PA 245467 Method S | 421 | GAGAAAACACACATTTCACATATTCTCATTCACTGGAGAGGAAATGGCCACCAAGGCGGAC | 480 |
| PA 245467 Method E | 421 | GAGAAAACACATATTCACATATTCTCATTCACTGGAGAGGAAATGGCCACCAAGGCGGAC  | 480 |
| PA 245467 Method K | 421 | GAGAAAACACATATTCACATATTCTCATTCACTGGAGAGGAAATGGCCACCAAGGCGGAC  | 480 |
| PA 245467 Method N | 421 | GAGAAAACACATATTCACATATTCTCATTCACTGGAGAGGAAATGGCCACCAAGGCGGAC  | 480 |

|                    |     |                                                               |     |
|--------------------|-----|---------------------------------------------------------------|-----|
| PA 245467 MiSeq    | 481 | TACACCCTTGATGAAGAGAGCAGGGCAAGAATAAAAAACCAGACTGTTCACTATAAGACAA | 540 |
| PA 245467 Method A | 481 | TACACCCTTGATGAAGAGAGCAGGGCAAGAATAAAAAACCAGACTGTTCACTATAAGACAA | 540 |
| PA 245467 Method S | 481 | TACACCCTTGATGAAGAAGCAGAGCAAGAATAAAAAACCAGACTGTTCACTATAAGACAA  | 540 |
| PA 245467 Method E | 481 | TACACCCTTGATGAAGAGAGCAGGGCAAGAATAAAAAACCAGACTGTTCACTATAAGACAA | 540 |
| PA 245467 Method K | 481 | TACACCCTTGATGAAGAGAGCAGGGCAAGAATAAAAAACCAGACTGTTCACTATAAGACAA | 540 |
| PA 245467 Method N | 481 | TACACCCTTGATGAAGAGAGCAGGGCAAGAATAAAAAACCAGACTGTTCACTATAAGACAA | 540 |

|                    |     |                                                               |     |
|--------------------|-----|---------------------------------------------------------------|-----|
| PA 245467 MiSeq    | 541 | GAAATGGCCAGTAGAGGTCTATGGGATTCCTTTTCGTCAGTCCGAGAGAGGCGAAGAGACA | 600 |
| PA 245467 Method A | 541 | GAAATGGCCAGTAGAGGTCTATGGGATTCCTTTTCGTCAGTCCGAGAGAGGCGAAGAGACA | 600 |
| PA 245467 Method S | 541 | GAAATGGCTAGTAGAGGTCTATGGGATTCCTTTTCGTCAGTCCGAGAGAGGCGAAGAGACA | 600 |
| PA 245467 Method E | 541 | GAAATGGCCAGTAGAGGTCTATGGGATTCCTTTTCGTCAGTCCGAGAGAGGCGAAGAGACA | 600 |
| PA 245467 Method K | 541 | GAAATGGCCAGTAGAGGTCTATGGGATTCCTTTTCGTCAGTCCGAGAGAGGCGAAGAGACA | 600 |
| PA 245467 Method N | 541 | GAAATGGCCAGTAGAGGTCTATGGGATTCCTTTTCGTCAGTCCGAGAGAGGCGAAGAGACA | 600 |

|                    |     |                                                               |     |
|--------------------|-----|---------------------------------------------------------------|-----|
| PA 245467 MiSeq    | 601 | ATTGAAGAAAGATTTGAAATCACAGGAACCATGCGCAGGCTTGCCGACCAAAGCCTCCCA  | 660 |
| PA 245467 Method A | 601 | ATTGAAGAAAGATTTGAAATCACAGGAACCATGCGCAGGCTTGCCGACCAAAGCCTCCCA  | 660 |
| PA 245467 Method S | 601 | ATTGAAGAAAGATTTGAAATCACAGGAACCATGCGCAGGCTTGCCGACCAAAGCTCTCCCA | 660 |
| PA 245467 Method E | 601 | ATTGAAGAAAGATTTGAAATCACAGGAACCATGCGCAGGCTTGCCGACCAAAGCCTCCCA  | 660 |
| PA 245467 Method K | 601 | ATTGAAGAAAGATTTGAAATCACAGGAACCATGCGCAGGCTTGCCGACCAAAGCCTCCCA  | 660 |
| PA 245467 Method N | 601 | ATTGAAGAAAGATTTGAAATCACAGGAACCATGCGCAGGCTTGCCGACCAAAGCCTCCCA  | 660 |

|                    |     |                                                                 |     |
|--------------------|-----|-----------------------------------------------------------------|-----|
| PA 245467 MiSeq    | 661 | CCGAACCTTCTCCAGCCTTGAAAACCTTTAGAGCCTATGTGGATGGATTTCGAACCGAACGGC | 720 |
| PA 245467 Method A | 661 | CCGAACCTTCTCCAGCCTTGAAAACCTTTAGAGCCTATGTGGATGGATTTCGAACCGAACGGC | 720 |
| PA 245467 Method S | 661 | CCGAACCTTCTCCAGCCTTGAAAACCTTTAGAGCCTATGTGGATGGATTTCGAACCGAACGGC | 720 |
| PA 245467 Method E | 661 | CCGAACCTTCTCCAGCCTTGAAAACCTTTAGAGCCTATGTGGATGGATTTCGAACCGAACGGC | 720 |
| PA 245467 Method K | 661 | CCGAACCTTCTCCAGCCTTGAAAACCTTTAGAGCCTATGTGGATGGATTTCGAACCGAACGGC | 720 |
| PA 245467 Method N | 661 | CCGAACCTTCTCCAGCCTTGAAAACCTTTAGAGCCTATGTGGATGGATTTCGAACCGAACGGC | 720 |

|                    |     |                                                               |     |
|--------------------|-----|---------------------------------------------------------------|-----|
| PA 245467 MiSeq    | 721 | TGCATTGAGGGCAAACCTTTCTCAAATGTCAAAAGAAGTGAACGCCAGAATTGAGCCATTT | 780 |
| PA 245467 Method A | 721 | TGCATTGAGGGCAAACCTTTCTCAAATGTCAAAAGAAGTGAACGCCAGAATTGAGCCATTT | 780 |
| PA 245467 Method S | 721 | TGCATTGAGGGCAAACCTTTCTCAAATGTCAAAAGAAGTGAACGCCAGAATTGAGCCATTT | 780 |
| PA 245467 Method E | 721 | TGCATTGAGGGCAAACCTTTCTCAAATGTCAAAAGAAGTGAACGCCAGAATTGAGCCATTT | 780 |
| PA 245467 Method K | 721 | TGCATTGAGGGCAAACCTTTCTCAAATGTCAAAAGAAGTGAACGCCAGAATTGAGCCATTT | 780 |
| PA 245467 Method N | 721 | TGCATTGAGGGCAAACCTTTCTCAAATGTCAAAAGAAGTGAACGCCAGAATTGAGCCATTT | 780 |

|                    |     |                                                               |     |
|--------------------|-----|---------------------------------------------------------------|-----|
| PA 245467 MiSeq    | 781 | CTGAAGACAACACCACGCCCTCTCAGATTACCTGATGGGCCTCTCTGTTCTCAGCGGTCTG | 840 |
| PA 245467 Method A | 781 | CTGAAGACAACACCACGCCCTCTCAGATTACCTGATGGGCCTCTCTGTTCTCAGCGGTCTG | 840 |
| PA 245467 Method S | 781 | CTGAAGACAACACCACGCCCTCTCAGATTACCTGATGGGCCTCTCTGTTCTCAGCGGTCTG | 840 |
| PA 245467 Method E | 781 | CTGAAGACAACACCACGCCCTCTCAGATTACCTGATGGGCCTCTCTGTTCTCAGCGGTCTG | 840 |
| PA 245467 Method K | 781 | CTGAAGACAACACCACGCCCTCTCAGATTACCTGATGGGCCTCTCTGTTCTCAGCGGTCTG | 840 |
| PA 245467 Method N | 781 | CTGAAGACAACACCACGCCCTCTCAGATTACCTGATGGGCCTCTCTGTTCTCAGCGGTCTG | 840 |

|                    |     |                                                               |     |
|--------------------|-----|---------------------------------------------------------------|-----|
| PA 245467 MiSeq    | 841 | AAGTTCTTGCTGATGGATGCCCTTAAGTTGAGCATCGAAGACCCTAGCCATGAGGGGGGAG | 900 |
| PA 245467 Method A | 841 | AAGTTCTTGCTGATGGATGCCCTTAAGTTGAGCATCGAAGACCCTAGCCATGAGGGGGGAG | 900 |
| PA 245467 Method S | 841 | AAGTTCTTGCTGATGGATGCCCTTAAGTTGAGCATCGAAGACCCTAGCCATGAGGGGGGAG | 900 |
| PA 245467 Method E | 841 | AAGTTCTTGCTGATGGATGCCCTTAAGTTGAGCATCGAAGACCCTAGCCATGAGGGGGGAG | 900 |
| PA 245467 Method K | 841 | AAGTTCTTGCTGATGGATGCCCTTAAGTTGAGCATCGAAGACCCTAGCCATGAGGGGGGAG | 900 |
| PA 245467 Method N | 841 | AAGTTCTTGCTGATGGATGCCCTTAAGTTGAGCATCGAAGACCCTAGCCATGAGGGGGGAG | 900 |

|                    |     |                                                                |     |
|--------------------|-----|----------------------------------------------------------------|-----|
| PA 245467 MiSeq    | 901 | GGCATAACCGCTGTATGATGCAATCAAATGCATGAAGACATTTTTTTGGCTGGAAAGAGCCC | 960 |
| PA 245467 Method A | 901 | GGCATAACCGCTGTATGATGCAATCAAATGCATGAAGACATTTTTTTGGCTGGAAAGAGCCC | 960 |
| PA 245467 Method S | 901 | GGCATAACCGCTGTATGATGCAATCAAATGCATGAAGACATTTTTTTGGCTGGAAAGAGCCC | 960 |
| PA 245467 Method E | 901 | GGCATAACCGCTGTATGATGCAATCAAATGCATGAAGACATTTTTTTGGCTGGAAAGAGCCC | 960 |
| PA 245467 Method K | 901 | GGCATAACCGCTGTATGATGCAATCAAATGCATGAAGACATTTTTTTGGCTGGAAAGAGCCC | 960 |
| PA 245467 Method N | 901 | GGCATAACCGCTGTATGATGCAATCAAATGCATGAAGACATTTTTTTGGCTGGAAAGAGCCC | 960 |

|                    |     |                                                               |      |
|--------------------|-----|---------------------------------------------------------------|------|
| PA 245467 MiSeq    | 961 | AACATCGTAAAGCCGCATGAGAAAGGCATAAACCCCTAATTACCTCCTGGCTTGGAAGCAG | 1020 |
| PA 245467 Method A | 961 | AACATCGTAAAGCCGCATGAGAAAGGCATAAACCCCTAATTACCTCCTGGCTTGGAAGCAG | 1020 |
| PA 245467 Method S | 961 | AACATCGTAAAGCCGCATGAGAAAGGCATAAACCCCTAATTACCTCCTGGCTTGGAAGCAG | 1020 |
| PA 245467 Method E | 961 | AACATCGTAAAGCCGCATGAGAAAGGCATAAACCCCTAATTACCTCCTGGCTTGGAAGCAG | 1020 |
| PA 245467 Method K | 961 | AACATCGTAAAGCCGCATGAGAAAGGCATAAACCCCTAATTACCTCCTGGCTTGGAAGCAG | 1020 |
| PA 245467 Method N | 961 | AACATCGTAAAGCCGCATGAGAAAGGCATAAACCCCTAATTACCTCCTGGCTTGGAAGCAG | 1020 |

|                    |      |                                                                |      |
|--------------------|------|----------------------------------------------------------------|------|
| PA 245467 MiSeq    | 1021 | GTGCTGGCAGAACTTCAAGACATTGAAAATGAGGAGAAAATTCCAAAAACAAAGAACATG   | 1080 |
| PA 245467 Method A | 1021 | GTGCTGGCAGAACTTCAAGACATTGAAAATGAGGAGAAAATTCCAAAAACAAAGAACATG   | 1080 |
| PA 245467 Method S | 1021 | GTGCTGGCAGAACTTCAAGA[TG]TTGAAAATGAGGAGAAAATTCCAAAAACAAAGAACATG | 1080 |
| PA 245467 Method E | 1021 | GTGCTGGCAGAACTTCAAGACATTGAAAATGAGGAGAAAATTCCAAAAACAAAGAACATG   | 1080 |
| PA 245467 Method K | 1021 | GTGCTGGCAGAACTTCAAGACATTGAAAATGAGGAGAAAATTCCAAAAACAAAGAACATG   | 1080 |
| PA 245467 Method N | 1021 | GTGCTGGCAGAACTTCAAGACATTGAAAATGAGGAGAAAATTCCAAAAACAAAGAACATG   | 1080 |

|                    |      |                                                              |      |
|--------------------|------|--------------------------------------------------------------|------|
| PA 245467 MiSeq    | 1081 | AAGAAAACAAGCCAATTGAAGTGGGCACTTGGTGAGAACATGGCTCCAGAAAAAGTGGAC | 1140 |
| PA 245467 Method A | 1081 | AAGAAAACAAGCCAATTGAAGTGGGCACTTGGTGAGAACATGGCTCCAGAAAAAGTGGAC | 1140 |
| PA 245467 Method S | 1081 | AAGAAAACAAGCCAATTGAAGTGGGCACTTGGTGAGAACATAGC[CCAGAAAAAGTGGAC | 1140 |
| PA 245467 Method E | 1081 | AAGAAAACAAGCCAATTGAAGTGGGCACTTGGTGAGAACATGGCTCCAGAAAAAGTGGAC | 1140 |
| PA 245467 Method K | 1081 | AAGAAAACAAGCCAATTGAAGTGGGCACTTGGTGAGAACATGGCTCCAGAAAAAGTGGAC | 1140 |
| PA 245467 Method N | 1081 | AAGAAAACAAGCCAATTGAAGTGGGCACTTGGTGAGAACATGGCTCCAGAAAAAGTGGAC | 1140 |

|                    |      |                                                                |      |
|--------------------|------|----------------------------------------------------------------|------|
| PA 245467 MiSeq    | 1141 | TTTGAGGACTGCAAAGATGTTAGCGATCTAAGACAGTACGACAGTGACGAACCAGAGTCT   | 1200 |
| PA 245467 Method A | 1141 | TTTGAGGACTGCAAAGATGTTAGCGATCTAAGACAGTACGACAGTGACGAACCAGAGTCT   | 1200 |
| PA 245467 Method S | 1141 | TTTGAGGACTGCAAAGATGTTAGCGATCTAAGACA[A]TACGACAGTGACGAACCAGAGTCT | 1200 |
| PA 245467 Method E | 1141 | TTTGAGGACTGCAAAGATGTTAGCGATCTAAGACAGTACGACAGTGACGAACCAGAGTCT   | 1200 |
| PA 245467 Method K | 1141 | TTTGAGGACTGCAAAGATGTTAGCGATCTAAGACAGTACGACAGTGACGAACCAGAGTCT   | 1200 |
| PA 245467 Method N | 1141 | TTTGAGGACTGCAAAGATGTTAGCGATCTAAGACAGTACGACAGTGACGAACCAGAGTCT   | 1200 |

|                    |      |                                                                |      |
|--------------------|------|----------------------------------------------------------------|------|
| PA 245467 MiSeq    | 1201 | AGATCACTAGCAAGCTGGATTTCAGAGTGAATTCAACAAGGCATGCGAACTGACAGATTTCG | 1260 |
| PA 245467 Method A | 1201 | AGATCACTAGCAAGCTGGATTTCAGAGTGAATTCAACAAGGCATGCGAACTGACAGATTTCG | 1260 |
| PA 245467 Method S | 1201 | AGATCACTAGCAAGCTGGATTTCAGAGTGAATTCAACAAGGCATGCGAACTGACAGATTTCG | 1260 |
| PA 245467 Method E | 1201 | AGATCACTAGCAAGCTGGATTTCAGAGTGAATTCAACAAGGCATGCGAACTGACAGATTTCG | 1260 |
| PA 245467 Method K | 1201 | AGATCACTAGCAAGCTGGATTTCAGAGTGAATTCAACAAGGCATGCGAACTGACAGATTTCG | 1260 |
| PA 245467 Method N | 1201 | AGATCACTAGCAAGCTGGATTTCAGAGTGAATTCAACAAGGCATGCGAACTGACAGATTTCG | 1260 |

|                    |      |                                                              |      |
|--------------------|------|--------------------------------------------------------------|------|
| PA 245467 MiSeq    | 1261 | AGTTGGATTGAACTTGATGAGATAGGGGAAGACGTTGCTCCAATCGAACACATTGCGAGT | 1320 |
| PA 245467 Method A | 1261 | AGTTGGATTGAACTTGATGAGATAGGGGAAGACGTTGCTCCAATCGAACACATTGCGAGT | 1320 |
| PA 245467 Method S | 1261 | AGTTGGATTGAACTTGATGAGATAGGGGAAGACGTTGCTCCAATCGAACACATTGCGAGT | 1320 |
| PA 245467 Method E | 1261 | AGTTGGATTGAACTTGATGAGATAGGGGAAGACGTTGCTCCAATCGAACACATTGCGAGT | 1320 |
| PA 245467 Method K | 1261 | AGTTGGATTGAACTTGATGAGATAGGGGAAGACGTTGCTCCAATCGAACACATTGCGAGT | 1320 |
| PA 245467 Method N | 1261 | AGTTGGATTGAACTTGATGAGATAGGGGAAGACGTTGCTCCAATCGAACACATTGCGAGT | 1320 |

|                    |      |                                                               |      |
|--------------------|------|---------------------------------------------------------------|------|
| PA 245467 MiSeq    | 1321 | GTGAGGAGGAACTATTTTCACAGCGGAGGTATCCCATTGCAGGGCCACTGAATACATAATG | 1380 |
| PA 245467 Method A | 1321 | GTGAGGAGGAACTATTTTCACAGCGGAGGTATCCCATTGCAGGGCCACTGAATACATAATG | 1380 |
| PA 245467 Method S | 1321 | GTGAGGAGGAACTATTTTCACAGCGGAGGTATCCCATTGCAGGGCCACTGAATACATAATG | 1380 |
| PA 245467 Method E | 1321 | GTGAGGAGGAACTATTTTCACAGCGGAGGTATCCCATTGCAGGGCCACTGAATACATAATG | 1380 |
| PA 245467 Method K | 1321 | GTGAGGAGGAACTATTTTCACAGCGGAGGTATCCCATTGCAGGGCCACTGAATACATAATG | 1380 |
| PA 245467 Method N | 1321 | GTGAGGAGGAACTATTTTCACAGCGGAGGTATCCCATTGCAGGGCCACTGAATACATAATG | 1380 |

|                    |      |                                                               |      |
|--------------------|------|---------------------------------------------------------------|------|
| PA 245467 MiSeq    | 1381 | AAGGGAGTATACATAAAACACAGCCCTATTGAATGCATCCTGTGCAGCCATGGATGACTTC | 1440 |
| PA 245467 Method A | 1381 | AAGGGAGTATACATAAAACACAGCCCTATTGAATGCATCCTGTGCAGCCATGGATGACTTC | 1440 |
| PA 245467 Method S | 1381 | AAGGGAGTATACATAAAACACAGCCCTATTGAATGCATCCTGTGCAGCCATGGATGACTTC | 1440 |
| PA 245467 Method E | 1381 | AAGGGAGTATACATAAAACACAGCCCTATTGAATGCATCCTGTGCAGCCATGGATGACTTC | 1440 |
| PA 245467 Method K | 1381 | AAGGGAGTATACATAAAACACAGCCCTATTGAATGCATCCTGTGCAGCCATGGATGACTTC | 1440 |
| PA 245467 Method N | 1381 | AAGGGAGTATACATAAAACACAGCCCTATTGAATGCATCCTGTGCAGCCATGGATGACTTC | 1440 |

|                           |      |                                                                |      |
|---------------------------|------|----------------------------------------------------------------|------|
| <b>PA 245467 MiSeq</b>    | 1441 | CAACTGATTCCAATGATAAGTAAGTGCAGAACTAAGGAAGGAAGACGGAAGACAAATCTG   | 1500 |
| <b>PA 245467 Method A</b> | 1441 | CAACTGATTCCAATGATAAGTAAGTGCAGAACTAAGGAAGGAAGACGGAAGACAAATCTG   | 1500 |
| <b>PA 245467 Method S</b> | 1441 | CAACTGATTCCAATGATAAGTAAAGTGCAGAACTAAAGGAAGGAAGACGGAAGACAAATCTG | 1500 |
| <b>PA 245467 Method E</b> | 1441 | CAACTGATTCCAATGATAAGTAAGTGCAGAACTAAGGAAGGAAGACGGAAGACAAATCTG   | 1500 |
| <b>PA 245467 Method K</b> | 1441 | CAACTGATTCCAATGATAAGTAAGTGCAGAACTAAGGAAGGAAGACGGAAGACAAATCTG   | 1500 |
| <b>PA 245467 Method N</b> | 1441 | CAACTGATTCCAATGATAAGTAAGTGCAGAACTAAGGAAGGAAGACGGAAGACAAATCTG   | 1500 |

|                           |      |                                                                |      |
|---------------------------|------|----------------------------------------------------------------|------|
| <b>PA 245467 MiSeq</b>    | 1501 | TATGGATTTCATTATAAAAAGGAAGATCCCATTTGAGGAATGACACCGATGTGGTAAACTTT | 1560 |
| <b>PA 245467 Method A</b> | 1501 | TATGGATTTCATTATAAAAAGGAAGATCCCATTTGAGGAATGACACCGATGTGGTAAACTTT | 1560 |
| <b>PA 245467 Method S</b> | 1501 | TATGGATTTCATTATAAAAAGGAAGATCCCATTTGAGGAATGACACCGATGTGGTAAACTTT | 1560 |
| <b>PA 245467 Method E</b> | 1501 | TATGGATTTCATTATAAAAAGGAAGATCCCATTTGAGGAATGACACCGATGTGGTAAACTTT | 1560 |
| <b>PA 245467 Method K</b> | 1501 | TATGGATTTCATTATAAAAAGGAAGATCCCATTTGAGGAATGACACCGATGTGGTAAACTTT | 1560 |
| <b>PA 245467 Method N</b> | 1501 | TATGGATTTCATTATAAAAAGGAAGATCCCATTTGAGGAATGACACCGATGTGGTAAACTTT | 1560 |

|                           |      |                                                              |      |
|---------------------------|------|--------------------------------------------------------------|------|
| <b>PA 245467 MiSeq</b>    | 1561 | GTGAGCATGGAATTCTCTCTAACTGACCCGAGGCTAGAGCCACACAAATGGGAAAAGTAC | 1620 |
| <b>PA 245467 Method A</b> | 1561 | GTGAGCATGGAATTCTCTCTAACTGACCCGAGGCTAGAGCCACACAAATGGGAAAAGTAC | 1620 |
| <b>PA 245467 Method S</b> | 1561 | GTGAGCATGGAATTCTCTCTAACTGACCCGAGGCTAGAGCCACACAAATGGGAAAAGTAC | 1620 |
| <b>PA 245467 Method E</b> | 1561 | GTGAGCATGGAATTCTCTCTAACTGACCCGAGGCTAGAGCCACACAAATGGGAAAAGTAC | 1620 |
| <b>PA 245467 Method K</b> | 1561 | GTGAGCATGGAATTCTCTCTAACTGACCCGAGGCTAGAGCCACACAAATGGGAAAAGTAC | 1620 |
| <b>PA 245467 Method N</b> | 1561 | GTGAGCATGGAATTCTCTCTAACTGACCCGAGGCTAGAGCCACACAAATGGGAAAAGTAC | 1620 |

|                           |      |                                                             |      |
|---------------------------|------|-------------------------------------------------------------|------|
| <b>PA 245467 MiSeq</b>    | 1621 | TGTGTTCTTGAGATAGGAGACATGCTCCTACGGACTGCAATAGGCCAAGTGTCGAGGCC | 1680 |
| <b>PA 245467 Method A</b> | 1621 | TGTGTTCTTGAGATAGGAGACATGCTCCTACGGACTGCAATAGGCCAAGTGTCGAGGCC | 1680 |
| <b>PA 245467 Method S</b> | 1621 | TGTGTTCTTGAGATAGGAGACATGCTCCTACGGACTGCAATAGGCCAAGTGTCGAGGCC | 1680 |
| <b>PA 245467 Method E</b> | 1621 | TGTGTTCTTGAGATAGGAGACATGCTCCTACGGACTGCAATAGGCCAAGTGTCGAGGCC | 1680 |
| <b>PA 245467 Method K</b> | 1621 | TGTGTTCTTGAGATAGGAGACATGCTCCTACGGACTGCAATAGGCCAAGTGTCGAGGCC | 1680 |
| <b>PA 245467 Method N</b> | 1621 | TGTGTTCTTGAGATAGGAGACATGCTCCTACGGACTGCAATAGGCCAAGTGTCGAGGCC | 1680 |

|                           |      |                                                               |      |
|---------------------------|------|---------------------------------------------------------------|------|
| <b>PA 245467 MiSeq</b>    | 1681 | ATGTTTCCTGTATGTGAGAACCAATGGGACTTCCAAGATCAAAATGAAATGGGGCATGGAG | 1740 |
| <b>PA 245467 Method A</b> | 1681 | ATGTTTCCTGTATGTGAGAACCAATGGGACTTCCAAGATCAAAATGAAATGGGGCATGGAG | 1740 |
| <b>PA 245467 Method S</b> | 1681 | ATGTTTCCTGTATGTGAGAACCAATGGGACTTCCAAGATCAAAATGAAATGGGGCATGGAG | 1740 |
| <b>PA 245467 Method E</b> | 1681 | ATGTTTCCTGTATGTGAGAACCAATGGGACTTCCAAGATCAAAATGAAATGGGGCATGGAG | 1740 |
| <b>PA 245467 Method K</b> | 1681 | ATGTTTCCTGTATGTGAGAACCAATGGGACTTCCAAGATCAAAATGAAATGGGGCATGGAG | 1740 |
| <b>PA 245467 Method N</b> | 1681 | ATGTTTCCTGTATGTGAGAACCAATGGGACTTCCAAGATCAAAATGAAATGGGGCATGGAG | 1740 |

|                           |      |                                                                                        |      |
|---------------------------|------|----------------------------------------------------------------------------------------|------|
| <b>PA 245467 MiSeq</b>    | 1741 | ATGAGGCGATGCCTTCTTCAGTCCCTTCAACAAATTGAGAGCATGATTGAGGCCGAATCT                           | 1800 |
| <b>PA 245467 Method A</b> | 1741 | ATGAGGCGATGCCTTCTTCAGTCCCTTCAACAAATTGAGAGCATGATTGAGGCCGAATCT                           | 1800 |
| <b>PA 245467 Method S</b> | 1741 | ATGAG <sup>A</sup> CGATGCCTTCTTCAGTCCCTTCAACAAATTGAGAGCA <sup>C</sup> GATTGAGGCCGAATCT | 1800 |
| <b>PA 245467 Method E</b> | 1741 | ATGAGGCGATGCCTTCTTCAGTCCCTTCAACAAATTGAGAGCATGATTGAGGCCGAATCT                           | 1800 |
| <b>PA 245467 Method K</b> | 1741 | ATGAGGCGATGCCTTCTTCAGTCCCTTCAACAAATTGAGAGCATGATTGAGGCCGAATCT                           | 1800 |
| <b>PA 245467 Method N</b> | 1741 | ATGAGGCGATGCCTTCTTCAGTCCCTTCAACAAATTGAGAGCATGATTGAGGCCGAATCT                           | 1800 |

|                           |      |                                                                           |      |
|---------------------------|------|---------------------------------------------------------------------------|------|
| <b>PA 245467 MiSeq</b>    | 1801 | TCTGTCAAAGAGAAGGACATGTCCAAGGAATTCTTTGAAAACAAATCAGAAACATGGCCA              | 1860 |
| <b>PA 245467 Method A</b> | 1801 | TCTGTCAAAGAGAAGGACATGTCCAAGGAATTCTTTGAAAACAAATCAGAAACATGGCCA              | 1860 |
| <b>PA 245467 Method S</b> | 1801 | TCTGTCAAAGAGAAGGACATG <sup>A</sup> CCAAGGAATTCTTTGAAAACAAATCAGAAACATGGCCA | 1860 |
| <b>PA 245467 Method E</b> | 1801 | TCTGTCAAAGAGAAGGACATGTCCAAGGAATTCTTTGAAAACAAATCAGAAACATGGCCA              | 1860 |
| <b>PA 245467 Method K</b> | 1801 | TCTGTCAAAGAGAAGGACATGTCCAAGGAATTCTTTGAAAACAAATCAGAAACATGGCCA              | 1860 |
| <b>PA 245467 Method N</b> | 1801 | TCTGTCAAAGAGAAGGACATGTCCAAGGAATTCTTTGAAAACAAATCAGAAACATGGCCA              | 1860 |

|                           |      |                                                              |      |
|---------------------------|------|--------------------------------------------------------------|------|
| <b>PA 245467 MiSeq</b>    | 1861 | ATTGGAGAATCACCCAAAGGGGTGGAGGAAGGCTCTATTGGGAAAGTATGCAGAACATTG | 1920 |
| <b>PA 245467 Method A</b> | 1861 | ATTGGAGAATCACCCAAAGGGGTGGAGGAAGGCTCTATTGGGAAAGTATGCAGAACATTG | 1920 |
| <b>PA 245467 Method S</b> | 1861 | ATTGGAGAATCACCCAAAGGGGTGGAGGAAGGCTCTATTGGGAAAGTATGCAGAACATTG | 1920 |
| <b>PA 245467 Method E</b> | 1861 | ATTGGAGAATCACCCAAAGGGGTGGAGGAAGGCTCTATTGGGAAAGTATGCAGAACATTG | 1920 |
| <b>PA 245467 Method K</b> | 1861 | ATTGGAGAATCACCCAAAGGGGTGGAGGAAGGCTCTATTGGGAAAGTATGCAGAACATTG | 1920 |
| <b>PA 245467 Method N</b> | 1861 | ATTGGAGAATCACCCAAAGGGGTGGAGGAAGGCTCTATTGGGAAAGTATGCAGAACATTG | 1920 |



|                           |      |                                                                 |      |
|---------------------------|------|-----------------------------------------------------------------|------|
| <b>PA 245467 MiSeq</b>    | 1921 | CTAGCAAAGTCTGTGTTCAACAGCCTATATGCATCTCCACAACCTCGAGGGGGTTTTTCAGCT | 1980 |
| <b>PA 245467 Method A</b> | 1921 | CTAGCAAAGTCTGTGTTCAACAGCCTATATGCATCTCCACAACCTCGAGGGGGTTTTTCAGCT | 1980 |
| <b>PA 245467 Method S</b> | 1921 | CTAGCAAAGTCTGTGTTCAACAGCCTATATGCATCTCCACAACCTCGAGGGGGTTTTTCAGCT | 1980 |
| <b>PA 245467 Method E</b> | 1921 | CTAGCAAAGTCTGTGTTCAACAGCCTATATGCATCTCCACAACCTCGAGGGGGTTTTTCAGCT | 1980 |
| <b>PA 245467 Method K</b> | 1921 | CTAGCAAAGTCTGTGTTCAACAGCCTATATGCATCTCCACAACCTCGAGGGGGTTTTTCAGCT | 1980 |
| <b>PA 245467 Method N</b> | 1921 | CTAGCAAAGTCTGTGTTCAACAGCCTATATGCATCTCCACAACCTCGAGGGGGTTTTTCAGCT | 1980 |

|                           |      |                                                               |      |
|---------------------------|------|---------------------------------------------------------------|------|
| <b>PA 245467 MiSeq</b>    | 1981 | GAATCAAGAAAATTGCTTCTCATTGTTTCAGGCACTTAGGGACAACCTGGAACCTGGAACC | 2040 |
| <b>PA 245467 Method A</b> | 1981 | GAATCAAGAAAATTGCTTCTCATTGTTTCAGGCACTTAGGGACAACCTGGAACCTGGAACC | 2040 |
| <b>PA 245467 Method S</b> | 1981 | GAATCAAGAAAATTGCTTCTCATTGTTTCAGGCACTTAGGGACAACCTGGAACCTGGAACC | 2040 |
| <b>PA 245467 Method E</b> | 1981 | GAATCAAGAAAATTGCTTCTCATTGTTTCAGGCACTTAGGGACAACCTGGAACCTGGAACC | 2040 |
| <b>PA 245467 Method K</b> | 1981 | GAATCAAGAAAATTGCTTCTCATTGTTTCAGGCACTTAGGGACAACCTGGAACCTGGAACC | 2040 |
| <b>PA 245467 Method N</b> | 1981 | GAATCAAGAAAATTGCTTCTCATTGTTTCAGGCACTTAGGGACAACCTGGAACCTGGAACC | 2040 |

|                           |      |                                                               |      |
|---------------------------|------|---------------------------------------------------------------|------|
| <b>PA 245467 MiSeq</b>    | 2041 | TTCGATCTTGGGGGGCTATATGAAGCAATTGAGGAGTGCCTGATTAAACGATCCCTGGGTT | 2100 |
| <b>PA 245467 Method A</b> | 2041 | TTCGATCTTGGGGGGCTATATGAAGCAATTGAGGAGTGCCTGATTAAACGATCCCTGGGTT | 2100 |
| <b>PA 245467 Method S</b> | 2041 | TTCGATCTTGGGGGGCTATATGAAGCAATTGAGGAGTGCCTGATTAAACGATCCCTGGGTT | 2100 |
| <b>PA 245467 Method E</b> | 2041 | TTCGATCTTGGGGGGCTATATGAAGCAATTGAGGAGTGCCTGATTAAACGATCCCTGGGTT | 2100 |
| <b>PA 245467 Method K</b> | 2041 | TTCGATCTTGGGGGGCTATATGAAGCAATTGAGGAGTGCCTGATTAAACGATCCCTGGGTT | 2100 |
| <b>PA 245467 Method N</b> | 2041 | TTCGATCTTGGGGGGCTATATGAAGCAATTGAGGAGTGCCTGATTAAACGATCCCTGGGTT | 2100 |

|                           |      |                                                     |      |
|---------------------------|------|-----------------------------------------------------|------|
| <b>PA 245467 MiSeq</b>    | 2101 | TTGCTTAATGCGTCTTGGTTCAACTCCTTCCTCACACATGCACTGAAATAG | 2151 |
| <b>PA 245467 Method A</b> | 2101 | TTGCTTAATGCGTCTTGGTTCAACTCCTTCCTCACACATGCACTGAAATAG | 2151 |
| <b>PA 245467 Method S</b> | 2101 | TTGCTTAATGCGTCTTGGTTCAACTCCTTCCTCACACATGCACTGAAATAG | 2151 |
| <b>PA 245467 Method E</b> | 2101 | TTGCTTAATGCGTCTTGGTTCAACTCCTTCCTCACACATGCACTGAAATAG | 2151 |
| <b>PA 245467 Method K</b> | 2101 | TTGCTTAATGCGTCTTGGTTCAACTCCTTCCTCACACATGCACTGAAATAG | 2151 |
| <b>PA 245467 Method N</b> | 2101 | TTGCTTAATGCGTCTTGGTTCAACTCCTTCCTCACACATGCACTGAAATAG | 2151 |
