# Supplementary material for: An Evaluation of Avian Influenza Virus Whole Genome Sequencing Approaches Using Nanopore Technology
Source: Preprints.org preprint supplement (doi:10.20944/preprints202301.0480.v1), 2023-01-26
Supplement: Supplementary file 40 [file supplementary]

## Formatted Alignments

|                    |   |                                                              |    |
|--------------------|---|--------------------------------------------------------------|----|
| NS 246038 MiSeq    | 1 | ATGGATTCCAACACTGTGTCAAGCTTTCAGGTAGACTGCTTTCTTTGGCATGTCCGCAAA | 60 |
| NS 246038 Method A | 1 | ATGGATTCCAACACTGTGTCAAGCTTTCAGGTAGACTGCTTTCTTTGGCATGTCCGCAAA | 60 |
| NS 246038 Method S | 1 | ATGGATTCCAACACTGTGTCAAGCTTTCAGGTAGACTGCTTTCTTTGGCATGTCCGCAAA | 60 |
| NS 246038 Method E | 1 | ATGGATTCCAACACTGTGTCAAGCTTTCAGGTAGACTGCTTTCTTTGGCATGTCCGCAAA | 60 |
| NS 246038 Method K | 1 | ATGGATTCCAACACTGTGTCAAGCTTTCAGGTAGACTGCTTTCTTTGGCATGTCCGCAAA | 60 |
| NS 246038 Method N | 1 | ATGGATTCCAACACTGTGTCAAGCTTTCAGGTAGACTGCTTTCTTTGGCATGTCCGCAAA | 60 |

|                    |    |                                                               |     |
|--------------------|----|---------------------------------------------------------------|-----|
| NS 246038 MiSeq    | 61 | CGATTTGCAGACCAAGAAGCTGGGTGATGCCCCATTCCTTGACCGGCTTCGCCGAGATCAG | 120 |
| NS 246038 Method A | 61 | CGATTTGCAGACCAAGAAGCTGGGTGATGCCCCATTCCTTGACCGGCTTCGCCGAGATCAG | 120 |
| NS 246038 Method S | 61 | CGATTTGCAGACCAAGAAGCTGGGTGATGCCCCATTCCTTGACCGGCTTCGCCGAGATCAG | 120 |
| NS 246038 Method E | 61 | CGATTTGCAGACCAAGAAGCTGGGTGATGCCCCATTCCTTGACCGGCTTCGCCGAGATCAG | 120 |
| NS 246038 Method K | 61 | CGATTTGCAGACCAAGAAGCTGGGTGATGCCCCATTCCTTGACCGGCTTCGCCGAGATCAG | 120 |
| NS 246038 Method N | 61 | CGATTTGCAGACCAAGAAGCTGGGTGATGCCCCATTCCTTGACCGGCTTCGCCGAGATCAG | 120 |

|                    |     |                                                               |     |
|--------------------|-----|---------------------------------------------------------------|-----|
| NS 246038 MiSeq    | 121 | AAATCCCTGAGAGGAAGAGGCAGCACTCTTGCTGCTGGGCATCGAAACAGCCACCCGTGCA | 180 |
| NS 246038 Method A | 121 | AAATCCCTGAGAGGAAGAGGCAGCACTCTTGCTGCTGGGCATCGAAACAGCCACCCGTGCA | 180 |
| NS 246038 Method S | 121 | AAATCCCTGAGAGGAAGAGGCAGCACTCTTGCTGCTGGGCATCGAAACAGCCACCCGTGCA | 180 |
| NS 246038 Method E | 121 | AAATCCCTGAGAGGAAGAGGCAGCACTCTTGCTGCTGGGCATCGAAACAGCCACCCGTGCA | 180 |
| NS 246038 Method K | 121 | AAATCCCTGAGAGGAAGAGGCAGCACTCTTGCTGCTGGGCATCGAAACAGCCACCCGTGCA | 180 |
| NS 246038 Method N | 121 | AAATCCCTGAGAGGAAGAGGCAGCACTCTTGCTGCTGGGCATCGAAACAGCCACCCGTGCA | 180 |

|                    |     |                                                              |     |
|--------------------|-----|--------------------------------------------------------------|-----|
| NS 246038 MiSeq    | 181 | GGAAAGCAGATAGTGGAGCGGATTCTGGAAGAAGAATCTGATGAGACACTTAAAATGACT | 240 |
| NS 246038 Method A | 181 | GGAAAGCAGATAGTGGAGCGGATTCTGGAAGAAGAATCTGATGAGACACTTAAAATGACT | 240 |
| NS 246038 Method S | 181 | GGAAAGCAGATAGTGGAGCGGATTCTGGAAGAAGAATCTGATGAGACACTTAAAATGACT | 240 |
| NS 246038 Method E | 181 | GGAAAGCAGATAGTGGAGCGGATTCTGGAAGAAGAATCTGATGAGACACTTAAAATGACT | 240 |
| NS 246038 Method K | 181 | GGAAAGCAGATAGTGGAGCGGATTCTGGAAGAAGAATCTGATGAGACACTTAAAATGACT | 240 |
| NS 246038 Method N | 181 | GGAAAGCAGATAGTGGAGCGGATTCTGGAAGAAGAATCTGATGAGACACTTAAAATGACT | 240 |

|                           |     |                                                               |     |
|---------------------------|-----|---------------------------------------------------------------|-----|
| <b>NS 246038 MiSeq</b>    | 241 | ATTGCCCCCTGTGCCAGCTTCACGCTACCTAACTGACATGACTCTTGAGGAAATGTCAAGG | 300 |
| <b>NS 246038 Method A</b> | 241 | ATTGCCCCCTGTGCCAGCTTCACGCTACCTAACTGACATGACTCTTGAGGAAATGTCAAGG | 300 |
| <b>NS 246038 Method S</b> | 241 | ATTGCCCCCTGTGCCAGCTTCACGCTACCTAACTGACATGACTCTTGAGGAAATGTCAAGG | 300 |
| <b>NS 246038 Method E</b> | 241 | ATTGCCCCCTGTGCCAGCTTCACGCTACCTAACTGACATGACTCTTGAGGAAATGTCAAGG | 300 |
| <b>NS 246038 Method K</b> | 241 | ATTGCCCCCTGTGCCAGCTTCACGCTACCTAACTGACATGACTCTTGAGGAAATGTCAAGG | 300 |
| <b>NS 246038 Method N</b> | 241 | ATTGCCCCCTGTGCCAGCTTCACGCTACCTAACTGACATGACTCTTGAGGAAATGTCAAGG | 300 |

|                           |     |                                                              |     |
|---------------------------|-----|--------------------------------------------------------------|-----|
| <b>NS 246038 MiSeq</b>    | 301 | GACTGGTTCATGCTCATGCCCAAACAGAAAGTGGCAGGTTCCCTTTGCATCAGAATGGAC | 360 |
| <b>NS 246038 Method A</b> | 301 | GACTGGTTCATGCTCATGCCCAAACAGAAAGTGGCAGGTTCCCTTTGCATCAGAATGGAC | 360 |
| <b>NS 246038 Method S</b> | 301 | GACTGGTTCATGCTCATGCCCAAACAGAAAGTGGCAGGTTCCCTTTGCATCAGAATGGAC | 360 |
| <b>NS 246038 Method E</b> | 301 | GACTGGTTCATGCTCATGCCCAAACAGAAAGTGGCAGGTTCCCTTTGCATCAGAATGGAC | 360 |
| <b>NS 246038 Method K</b> | 301 | GACTGGTTCATGCTCATGCCCAAACAGAAAGTGGCAGGTTCCCTTTGCATCAGAATGGAC | 360 |
| <b>NS 246038 Method N</b> | 301 | GACTGGTTCATGCTCATGCCCAAACAGAAAGTGGCAGGTTCCCTTTGCATCAGAATGGAC | 360 |

|                           |     |                                                                |     |
|---------------------------|-----|----------------------------------------------------------------|-----|
| <b>NS 246038 MiSeq</b>    | 361 | CAGGCAATAATGGATAAAAAACATCATATTGAAAGCAAACCTTCAGTGTGATTTTTGACCGG | 420 |
| <b>NS 246038 Method A</b> | 361 | CAGGCAATAATGGATAAAAAACATCATATTGAAAGCAAACCTTCAGTGTGATTTTTGACCGG | 420 |
| <b>NS 246038 Method S</b> | 361 | CAGGCAATAATGGATAAAAAACATCATATTGAAAGCAAACCTTCAGTGTGATTTTTGACCGG | 420 |
| <b>NS 246038 Method E</b> | 361 | CAGGCAATAATGGATAAAAAACATCATATTGAAAGCAAACCTTCAGTGTGATTTTTGACCGG | 420 |
| <b>NS 246038 Method K</b> | 361 | CAGGCAATAATGGATAAAAAACATCATATTGAAAGCAAACCTTCAGTGTGATTTTTGACCGG | 420 |
| <b>NS 246038 Method N</b> | 361 | CAGGCAATAATGGATAAAAAACATCATATTGAAAGCAAACCTTCAGTGTGATTTTTGACCGG | 420 |

|                           |     |                                                              |     |
|---------------------------|-----|--------------------------------------------------------------|-----|
| <b>NS 246038 MiSeq</b>    | 421 | CTGGAAACCCTAATACTACTTAGAGCTTTCACAGAAGAAGGAGCAATTGTGGGAGAAATC | 480 |
| <b>NS 246038 Method A</b> | 421 | CTGGAAACCCTAATACTACTTAGAGCTTTCACAGAAGAAGGAGCAATTGTGGGAGAAATC | 480 |
| <b>NS 246038 Method S</b> | 421 | CTGGAAACCCTAATACTACTTAGAGCTTTCACAGAAGAAGGAGCAATTGTGGGAGAAATC | 480 |
| <b>NS 246038 Method E</b> | 421 | CTGGAAACCCTAATACTACTTAGAGCTTTCACAGAAGAAGGAGCAATTGTGGGAGAAATC | 480 |
| <b>NS 246038 Method K</b> | 421 | CTGGAAACCCTAATACTACTTAGAGCTTTCACAGAAGAAGGAGCAATTGTGGGAGAAATC | 480 |
| <b>NS 246038 Method N</b> | 421 | CTGGAAACCCTAATACTACTTAGAGCTTTCACAGAAGAAGGAGCAATTGTGGGAGAAATC | 480 |

|                    |     |                                                               |     |
|--------------------|-----|---------------------------------------------------------------|-----|
| NS 246038 MiSeq    | 481 | TCACCATTACCTTCTCTTCCAGGACATACTGATGAGGATGTCAAAAATGCAATTGGGGTCT | 540 |
| NS 246038 Method A | 481 | TCACCATTACCTTCTCTTCCAGGACATACTGATGAGGATGTCAAAAATGCAATTGGGGTCT | 540 |
| NS 246038 Method S | 481 | TCACCATTACCTTCTCTTCCAGGACATACTGATGAGGATGTCAAAAATGCAATTGGGGTCT | 540 |
| NS 246038 Method E | 481 | TCACCATTACCTTCTCTTCCAGGACATACTGATGAGGATGTCAAAAATGCAATTGGGGTCT | 540 |
| NS 246038 Method K | 481 | TCACCATTACCTTCTCTTCCAGGACATACTGATGAGGATGTCAAAAATGCAATTGGGGTCT | 540 |
| NS 246038 Method N | 481 | TCACCATTACCTTCTCTTCCAGGACATACTGATGAGGATGTCAAAAATGCAATTGGGGTCT | 540 |

|                    |     |                                                              |     |
|--------------------|-----|--------------------------------------------------------------|-----|
| NS 246038 MiSeq    | 541 | CTCATCGGAGGACTTGAATGGAATGATAACACAGTTCGAGTCTCTGAAACTTTACAGAGA | 600 |
| NS 246038 Method A | 541 | CTCATCGGAGGACTTGAATGGAATGATAACACAGTTCGAGTCTCTGAAACTTTACAGAGA | 600 |
| NS 246038 Method S | 541 | CTCATCGGAGGACTTGAATGGAATGATAACACAGTTCGAGTCTCTGAAACTTTACAGAGA | 600 |
| NS 246038 Method E | 541 | CTCATCGGAGGACTTGAATGGAATGATAACACAGTTCGAGTCTCTGAAACTTTACAGAGA | 600 |
| NS 246038 Method K | 541 | CTCATCGGAGGACTTGAATGGAATGATAACACAGTTCGAGTCTCTGAAACTTTACAGAGA | 600 |
| NS 246038 Method N | 541 | CTCATCGGAGGACTTGAATGGAATGATAACACAGTTCGAGTCTCTGAAACTTTACAGAGA | 600 |

|                    |     |                                                              |     |
|--------------------|-----|--------------------------------------------------------------|-----|
| NS 246038 MiSeq    | 601 | TTCGCTTGGAGAAGCAGTAATGAGGATGGGAGACCTCCACTCCCTCCAAAGCAGAAACGG | 660 |
| NS 246038 Method A | 601 | TTCGCTTGGAGAAGCAGTAATGAGGATGGGAGACCTCCACTCCCTCCAAAGCAGAAACGG | 660 |
| NS 246038 Method S | 601 | TTCGCTTGGAGAAGCAGTAATGAGGATGGGAGACCTCCACTCCCTCCAAAGCAGAAACGG | 660 |
| NS 246038 Method E | 601 | TTCGCTTGGAGAAGCAGTAATGAGGATGGGAGACCTCCACTCCCTCCAAAGCAGAAACGG | 660 |
| NS 246038 Method K | 601 | TTCGCTTGGAGAAGCAGTAATGAGGATGGGAGACCTCCACTCCCTCCAAAGCAGAAACGG | 660 |
| NS 246038 Method N | 601 | TTCGCTTGGAGAAGCAGTAATGAGGATGGGAGACCTCCACTCCCTCCAAAGCAGAAACGG | 660 |

|                    |     |                                                              |     |
|--------------------|-----|--------------------------------------------------------------|-----|
| NS 246038 MiSeq    | 661 | AAAATGGCGAGAACAATTGAGTCAGAAGTTTGAGGAAATAAGATGGCTGATTGAAGGAGT | 720 |
| NS 246038 Method A | 661 | AAAATGGCGAGAACAATTGAGTCAGAAGTTTGAGGAAATAAGATGGCTGATTGAAGGAGT | 720 |
| NS 246038 Method S | 661 | AAAATGGCGAGAACAATTGAGTCAGAAGTTTGAGGAAATAAGATGGCTGATTGAAGGAGT | 720 |
| NS 246038 Method E | 661 | AAAATGGCGAGAACAATTGAGTCAGAAGTTTGAGGAAATAAGATGGCTGATTGAAGGAGT | 720 |
| NS 246038 Method K | 661 | AAAATGGCGAGAACAATTGAGTCAGAAGTTTGAGGAAATAAGATGGCTGATTGAAGGAGT | 720 |
| NS 246038 Method N | 661 | AAAATGGCGAGAACAATTGAGTCAGAAGTTTGAGGAAATAAGATGGCTGATTGAAGGAGT | 720 |

|                           |     |                                                              |     |
|---------------------------|-----|--------------------------------------------------------------|-----|
| <b>NS 246038 MiSeq</b>    | 721 | GCGGCACAGATTGAAGATTACAGAGAACAGTTTCGAACAGATAACTTTTATGCAAGCCTT | 780 |
| <b>NS 246038 Method A</b> | 721 | GCGGCACAGATTGAAGATTACAGAGAACAGTTTCGAACAGATAACTTTTATGCAAGCCTT | 780 |
| <b>NS 246038 Method S</b> | 721 | GCGGCACAGATTGAAGATTACAGAGAACAGTTTCGAACAGATAACTTTTATGCAAGCCTT | 780 |
| <b>NS 246038 Method E</b> | 721 | GCGGCACAGATTGAAGATTACAGAGAACAGTTTCGAACAGATAACTTTTATGCAAGCCTT | 780 |
| <b>NS 246038 Method K</b> | 721 | GCGGCACAGATTGAAGATTACAGAGAACAGTTTCGAACAGATAACTTTTATGCAAGCCTT | 780 |
| <b>NS 246038 Method N</b> | 721 | GCGGCACAGATTGAAGATTACAGAGAACAGTTTCGAACAGATAACTTTTATGCAAGCCTT | 780 |

|                           |     |                                                               |     |
|---------------------------|-----|---------------------------------------------------------------|-----|
| <b>NS 246038 MiSeq</b>    | 781 | ACAAC TATTGCTTGAAGTGGAGCAAGAGATAAGA AACTTTCTCGTTTCAGCTTATTTAA | 838 |
| <b>NS 246038 Method A</b> | 781 | ACAAC TATTGCTTGAAGTGGAGCAAGAGATAAGA AACTTTCTCGTTTCAGCTTATTTAA | 838 |
| <b>NS 246038 Method S</b> | 781 | ACAAC TATTGCTTGAAGTGGAGCAAGAGATAAGA AACTTTCTCGTTTCAGCTTATTTAA | 838 |
| <b>NS 246038 Method E</b> | 781 | ACAAC TATTGCTTGAAGTGGAGCAAGAGATAAGA AACTTTCTCGTTTCAGCTTATTTAA | 838 |
| <b>NS 246038 Method K</b> | 781 | ACAAC TATTGCTTGAAGTGGAGCAAGAGATAAGA AACTTTCTCGTTTCAGCTTATTTAA | 838 |
| <b>NS 246038 Method N</b> | 781 | ACAAC TATTGCTTGAAGTGGAGCAAGAGATAAGA AACTTTCTCGTTTCAGCTTATTTAA | 838 |
