# Supplementary material for: An Evaluation of Avian Influenza Virus Whole Genome Sequencing Approaches Using Nanopore Technology
Source: Preprints.org preprint supplement (doi:10.20944/preprints202301.0480.v1), 2023-01-26
Supplement: Supplementary file 45 [file supplementary]

| 246038   | PB2 | PB1 | PA | H5 | NP | N1 | MA | NS |
|----------|-----|-----|----|----|----|----|----|----|
| Method A | -   | -   | -  | -  | -  | -  | -  | -  |
| Method S | -   | -   | -  | -  | -  | -  | -  | -  |
| Method E | 1   | -   | -  | -  | -  | -  | -  | -  |
| Method K | -   | -   | -  | -  | -  | -  | -  | -  |
| Method N | -   | -   | -  | -  | -  | -  | -  | -  |
