# Supplementary material for: An Evaluation of Avian Influenza Virus Whole Genome Sequencing Approaches Using Nanopore Technology
Source: Preprints.org preprint supplement (doi:10.20944/preprints202301.0480.v1), 2023-01-26
Supplement: Supplementary file 46 [file supplementary]

## Formatted Alignments

|                    |   |                                                               |    |
|--------------------|---|---------------------------------------------------------------|----|
| MA 246038 MiSeq    | 1 | ATGAGTCTTCTAACCGAGGTCGAAACGTACGTTCTCTCTATCGTCCCGTCGGGGCCCCCTC | 60 |
| MA 246038 Method A | 1 | ATGAGTCTTCTAACCGAGGTCGAAACGTACGTTCTCTCTATCGTCCCGTCGGGGCCCCCTC | 60 |
| MA 246038 Method S | 1 | ATGAGTCTTCTAACCGAGGTCGAAACGTACGTTCTCTCTATCGTCCCGTCGGGGCCCCCTC | 60 |
| MA 246038 Method E | 1 | ATGAGTCTTCTAACCGAGGTCGAAACGTACGTTCTCTCTATCGTCCCGTCGGGGCCCCCTC | 60 |
| MA 246038 Method K | 1 | ATGAGTCTTCTAACCGAGGTCGAAACGTACGTTCTCTCTATCGTCCCGTCGGGGCCCCCTC | 60 |
| MA 246038 Method N | 1 | ATGAGTCTTCTAACCGAGGTCGAAACGTACGTTCTCTCTATCGTCCCGTCGGGGCCCCCTC | 60 |

|                    |    |                                                              |     |
|--------------------|----|--------------------------------------------------------------|-----|
| MA 246038 MiSeq    | 61 | AAAGCCGAGATCGCGCAGAGACTTGAAGATGTCTTTGCAGGGAAGAACACCGATCTTGAG | 120 |
| MA 246038 Method A | 61 | AAAGCCGAGATCGCGCAGAGACTTGAAGATGTCTTTGCAGGGAAGAACACCGATCTTGAG | 120 |
| MA 246038 Method S | 61 | AAAGCCGAGATCGCGCAGAGACTTGAAGATGTCTTTGCAGGGAAGAACACCGATCTTGAG | 120 |
| MA 246038 Method E | 61 | AAAGCCGAGATCGCGCAGAGACTTGAAGATGTCTTTGCAGGGAAGAACACCGATCTTGAG | 120 |
| MA 246038 Method K | 61 | AAAGCCGAGATCGCGCAGAGACTTGAAGATGTCTTTGCAGGGAAGAACACCGATCTTGAG | 120 |
| MA 246038 Method N | 61 | AAAGCCGAGATCGCGCAGAGACTTGAAGATGTCTTTGCAGGGAAGAACACCGATCTTGAG | 120 |

|                    |     |                                                             |     |
|--------------------|-----|-------------------------------------------------------------|-----|
| MA 246038 MiSeq    | 121 | GCTCTCATGGAATGGCTAAAGACAAGACCAATCCTGTACCTCTGACTAAGGGGATTTTG | 180 |
| MA 246038 Method A | 121 | GCTCTCATGGAATGGCTAAAGACAAGACCAATCCTGTACCTCTGACTAAGGGGATTTTG | 180 |
| MA 246038 Method S | 121 | GCTCTCATGGAATGGCTAAAGACAAGACCAATCCTGTACCTCTGACTAAGGGGATTTTG | 180 |
| MA 246038 Method E | 121 | GCTCTCATGGAATGGCTAAAGACAAGACCAATCCTGTACCTCTGACTAAGGGGATTTTG | 180 |
| MA 246038 Method K | 121 | GCTCTCATGGAATGGCTAAAGACAAGACCAATCCTGTACCTCTGACTAAGGGGATTTTG | 180 |
| MA 246038 Method N | 121 | GCTCTCATGGAATGGCTAAAGACAAGACCAATCCTGTACCTCTGACTAAGGGGATTTTG | 180 |

|                    |     |                                                              |     |
|--------------------|-----|--------------------------------------------------------------|-----|
| MA 246038 MiSeq    | 181 | GGATTTGTGTTACAGCTCACCGTGCCCAGTGAGCGAGGACTGCAGCGTAGACGCTTTGTC | 240 |
| MA 246038 Method A | 181 | GGATTTGTGTTACAGCTCACCGTGCCCAGTGAGCGAGGACTGCAGCGTAGACGCTTTGTC | 240 |
| MA 246038 Method S | 181 | GGATTTGTGTTACAGCTCACCGTGCCCAGTGAGCGAGGACTGCAGCGTAGACGCTTTGTC | 240 |
| MA 246038 Method E | 181 | GGATTTGTGTTACAGCTCACCGTGCCCAGTGAGCGAGGACTGCAGCGTAGACGCTTTGTC | 240 |
| MA 246038 Method K | 181 | GGATTTGTGTTACAGCTCACCGTGCCCAGTGAGCGAGGACTGCAGCGTAGACGCTTTGTC | 240 |
| MA 246038 Method N | 181 | GGATTTGTGTTACAGCTCACCGTGCCCAGTGAGCGAGGACTGCAGCGTAGACGCTTTGTC | 240 |

|                           |     |                                                              |     |
|---------------------------|-----|--------------------------------------------------------------|-----|
| <b>MA 246038 MiSeq</b>    | 241 | CAAAATGCTCTAAATGGAAATGGAGACCCAAACAACATGGACAGGGCAGTCAAGTTGTAC | 300 |
| <b>MA 246038 Method A</b> | 241 | CAAAATGCTCTAAATGGAAATGGAGACCCAAACAACATGGACAGGGCAGTCAAGTTGTAC | 300 |
| <b>MA 246038 Method S</b> | 241 | CAAAATGCTCTAAATGGAAATGGAGACCCAAACAACATGGACAGGGCAGTCAAGTTGTAC | 300 |
| <b>MA 246038 Method E</b> | 241 | CAAAATGCTCTAAATGGAAATGGAGACCCAAACAACATGGACAGGGCAGTCAAGTTGTAC | 300 |
| <b>MA 246038 Method K</b> | 241 | CAAAATGCTCTAAATGGAAATGGAGACCCAAACAACATGGACAGGGCAGTCAAGTTGTAC | 300 |
| <b>MA 246038 Method N</b> | 241 | CAAAATGCTCTAAATGGAAATGGAGACCCAAACAACATGGACAGGGCAGTCAAGTTGTAC | 300 |

|                           |     |                                                              |     |
|---------------------------|-----|--------------------------------------------------------------|-----|
| <b>MA 246038 MiSeq</b>    | 301 | AGGAAATTAAAGAGAGAGATAACATTCCATGGGGCTAAAGAAGTTGCACTCAGTTACTCA | 360 |
| <b>MA 246038 Method A</b> | 301 | AGGAAATTAAAGAGAGAGATAACATTCCATGGGGCTAAAGAAGTTGCACTCAGTTACTCA | 360 |
| <b>MA 246038 Method S</b> | 301 | AGGAAATTAAAGAGAGAGATAACATTCCATGGGGCTAAAGAAGTTGCACTCAGTTACTCA | 360 |
| <b>MA 246038 Method E</b> | 301 | AGGAAATTAAAGAGAGAGATAACATTCCATGGGGCTAAAGAAGTTGCACTCAGTTACTCA | 360 |
| <b>MA 246038 Method K</b> | 301 | AGGAAATTAAAGAGAGAGATAACATTCCATGGGGCTAAAGAAGTTGCACTCAGTTACTCA | 360 |
| <b>MA 246038 Method N</b> | 301 | AGGAAATTAAAGAGAGAGATAACATTCCATGGGGCTAAAGAAGTTGCACTCAGTTACTCA | 360 |

|                           |     |                                                              |     |
|---------------------------|-----|--------------------------------------------------------------|-----|
| <b>MA 246038 MiSeq</b>    | 361 | ACCGGTGCACTTGCCAGTTGTATGGGTCTCATATACAACAGGATGGGGACGGTGACCGCA | 420 |
| <b>MA 246038 Method A</b> | 361 | ACCGGTGCACTTGCCAGTTGTATGGGTCTCATATACAACAGGATGGGGACGGTGACCGCA | 420 |
| <b>MA 246038 Method S</b> | 361 | ACCGGTGCACTTGCCAGTTGTATGGGTCTCATATACAACAGGATGGGGACGGTGACCGCA | 420 |
| <b>MA 246038 Method E</b> | 361 | ACCGGTGCACTTGCCAGTTGTATGGGTCTCATATACAACAGGATGGGGACGGTGACCGCA | 420 |
| <b>MA 246038 Method K</b> | 361 | ACCGGTGCACTTGCCAGTTGTATGGGTCTCATATACAACAGGATGGGGACGGTGACCGCA | 420 |
| <b>MA 246038 Method N</b> | 361 | ACCGGTGCACTTGCCAGTTGTATGGGTCTCATATACAACAGGATGGGGACGGTGACCGCA | 420 |

|                           |     |                                                              |     |
|---------------------------|-----|--------------------------------------------------------------|-----|
| <b>MA 246038 MiSeq</b>    | 421 | GAAGTGGCATTGGGCCTAGTGTGTGCCACCTGTGAGCAGATTGCTGATTCACAGCATCGG | 480 |
| <b>MA 246038 Method A</b> | 421 | GAAGTGGCATTGGGCCTAGTGTGTGCCACCTGTGAGCAGATTGCTGATTCACAGCATCGG | 480 |
| <b>MA 246038 Method S</b> | 421 | GAAGTGGCATTGGGCCTAGTGTGTGCCACCTGTGAGCAGATTGCTGATTCACAGCATCGG | 480 |
| <b>MA 246038 Method E</b> | 421 | GAAGTGGCATTGGGCCTAGTGTGTGCCACCTGTGAGCAGATTGCTGATTCACAGCATCGG | 480 |
| <b>MA 246038 Method K</b> | 421 | GAAGTGGCATTGGGCCTAGTGTGTGCCACCTGTGAGCAGATTGCTGATTCACAGCATCGG | 480 |
| <b>MA 246038 Method N</b> | 421 | GAAGTGGCATTGGGCCTAGTGTGTGCCACCTGTGAGCAGATTGCTGATTCACAGCATCGG | 480 |

|                           |     |                                                              |     |
|---------------------------|-----|--------------------------------------------------------------|-----|
| <b>MA 246038 MiSeq</b>    | 481 | TCTCACAGACAGATAGCCACCACCACCAACCCACTAATCAGACATGAAAACAGAATGGTG | 540 |
| <b>MA 246038 Method A</b> | 481 | TCTCACAGACAGATAGCCACCACCACCAACCCACTAATCAGACATGAAAACAGAATGGTG | 540 |
| <b>MA 246038 Method S</b> | 481 | TCTCACAGACAGATAGCCACCACCACCAACCCACTAATCAGACATGAAAACAGAATGGTG | 540 |
| <b>MA 246038 Method E</b> | 481 | TCTCACAGACAGATAGCCACCACCACCAACCCACTAATCAGACATGAAAACAGAATGGTG | 540 |
| <b>MA 246038 Method K</b> | 481 | TCTCACAGACAGATAGCCACCACCACCAACCCACTAATCAGACATGAAAACAGAATGGTG | 540 |
| <b>MA 246038 Method N</b> | 481 | TCTCACAGACAGATAGCCACCACCACCAACCCACTAATCAGACATGAAAACAGAATGGTG | 540 |

|                           |     |                                                              |     |
|---------------------------|-----|--------------------------------------------------------------|-----|
| <b>MA 246038 MiSeq</b>    | 541 | TTGGCCAGTACTACAGCTAAGGCTATGGAGCAGATGGCTGGATCGAGTGAGCAAGCAGTG | 600 |
| <b>MA 246038 Method A</b> | 541 | TTGGCCAGTACTACAGCTAAGGCTATGGAGCAGATGGCTGGATCGAGTGAGCAAGCAGTG | 600 |
| <b>MA 246038 Method S</b> | 541 | TTGGCCAGTACTACAGCTAAGGCTATGGAGCAGATGGCTGGATCGAGTGAGCAAGCAGTG | 600 |
| <b>MA 246038 Method E</b> | 541 | TTGGCCAGTACTACAGCTAAGGCTATGGAGCAGATGGCTGGATCGAGTGAGCAAGCAGTG | 600 |
| <b>MA 246038 Method K</b> | 541 | TTGGCCAGTACTACAGCTAAGGCTATGGAGCAGATGGCTGGATCGAGTGAGCAAGCAGTG | 600 |
| <b>MA 246038 Method N</b> | 541 | TTGGCCAGTACTACAGCTAAGGCTATGGAGCAGATGGCTGGATCGAGTGAGCAAGCAGTG | 600 |

|                           |     |                                                              |     |
|---------------------------|-----|--------------------------------------------------------------|-----|
| <b>MA 246038 MiSeq</b>    | 601 | GAAGCCATGGAGGTTGCTAGTCAGGCTAGGCAGATGGTGCAGGCGATGAGGACCATTGGA | 660 |
| <b>MA 246038 Method A</b> | 601 | GAAGCCATGGAGGTTGCTAGTCAGGCTAGGCAGATGGTGCAGGCGATGAGGACCATTGGA | 660 |
| <b>MA 246038 Method S</b> | 601 | GAAGCCATGGAGGTTGCTAGTCAGGCTAGGCAGATGGTGCAGGCGATGAGGACCATTGGA | 660 |
| <b>MA 246038 Method E</b> | 601 | GAAGCCATGGAGGTTGCTAGTCAGGCTAGGCAGATGGTGCAGGCGATGAGGACCATTGGA | 660 |
| <b>MA 246038 Method K</b> | 601 | GAAGCCATGGAGGTTGCTAGTCAGGCTAGGCAGATGGTGCAGGCGATGAGGACCATTGGA | 660 |
| <b>MA 246038 Method N</b> | 601 | GAAGCCATGGAGGTTGCTAGTCAGGCTAGGCAGATGGTGCAGGCGATGAGGACCATTGGA | 660 |

|                           |     |                                                              |     |
|---------------------------|-----|--------------------------------------------------------------|-----|
| <b>MA 246038 MiSeq</b>    | 661 | ACTCATCCTAGCTCCAGTGCCGGTCTGAGAGATGATCTCCTTGAAAATTTGCAGGCCTAC | 720 |
| <b>MA 246038 Method A</b> | 661 | ACTCATCCTAGCTCCAGTGCCGGTCTGAGAGATGATCTCCTTGAAAATTTGCAGGCCTAC | 720 |
| <b>MA 246038 Method S</b> | 661 | ACTCATCCTAGCTCCAGTGCCGGTCTGAGAGATGATCTCCTTGAAAATTTGCAGGCCTAC | 720 |
| <b>MA 246038 Method E</b> | 661 | ACTCATCCTAGCTCCAGTGCCGGTCTGAGAGATGATCTCCTTGAAAATTTGCAGGCCTAC | 720 |
| <b>MA 246038 Method K</b> | 661 | ACTCATCCTAGCTCCAGTGCCGGTCTGAGAGATGATCTCCTTGAAAATTTGCAGGCCTAC | 720 |
| <b>MA 246038 Method N</b> | 661 | ACTCATCCTAGCTCCAGTGCCGGTCTGAGAGATGATCTCCTTGAAAATTTGCAGGCCTAC | 720 |

|                           |     |                                                              |     |
|---------------------------|-----|--------------------------------------------------------------|-----|
| <b>MA 246038 MiSeq</b>    | 721 | CAAAAACGGATGGGAGTGCAACTGCAGCGATTCAAGTGATCCTCTCGTTATTGCCGCAAG | 780 |
| <b>MA 246038 Method A</b> | 721 | CAAAAACGGATGGGAGTGCAACTGCAGCGATTCAAGTGATCCTCTCGTTATTGCCGCAAG | 780 |
| <b>MA 246038 Method S</b> | 721 | CAAAAACGGATGGGAGTGCAACTGCAGCGATTCAAGTGATCCTCTCGTTATTGCCGCAAG | 780 |
| <b>MA 246038 Method E</b> | 721 | CAAAAACGGATGGGAGTGCAACTGCAGCGATTCAAGTGATCCTCTCGTTATTGCCGCAAG | 780 |
| <b>MA 246038 Method K</b> | 721 | CAAAAACGGATGGGAGTGCAACTGCAGCGATTCAAGTGATCCTCTCGTTATTGCCGCAAG | 780 |
| <b>MA 246038 Method N</b> | 721 | CAAAAACGGATGGGAGTGCAACTGCAGCGATTCAAGTGATCCTCTCGTTATTGCCGCAAG | 780 |

|                           |     |                                                              |     |
|---------------------------|-----|--------------------------------------------------------------|-----|
| <b>MA 246038 MiSeq</b>    | 781 | TATCATTGGGATCTTGCACTTGATATTGTGGATTCTTGATCGCCTTTTCTTCAAATGCGT | 840 |
| <b>MA 246038 Method A</b> | 781 | TATCATTGGGATCTTGCACTTGATATTGTGGATTCTTGATCGCCTTTTCTTCAAATGCGT | 840 |
| <b>MA 246038 Method S</b> | 781 | TATCATTGGGATCTTGCACTTGATATTGTGGATTCTTGATCGCCTTTTCTTCAAATGCGT | 840 |
| <b>MA 246038 Method E</b> | 781 | TATCATTGGGATCTTGCACTTGATATTGTGGATTCTTGATCGCCTTTTCTTCAAATGCGT | 840 |
| <b>MA 246038 Method K</b> | 781 | TATCATTGGGATCTTGCACTTGATATTGTGGATTCTTGATCGCCTTTTCTTCAAATGCGT | 840 |
| <b>MA 246038 Method N</b> | 781 | TATCATTGGGATCTTGCACTTGATATTGTGGATTCTTGATCGCCTTTTCTTCAAATGCGT | 840 |

|                           |     |                                                              |     |
|---------------------------|-----|--------------------------------------------------------------|-----|
| <b>MA 246038 MiSeq</b>    | 841 | TTATCGTCGCCTTAAATACGGTTTGAAAGGAGGGCCTTCTACGGAAGGAGTACCTGAGTC | 900 |
| <b>MA 246038 Method A</b> | 841 | TTATCGTCGCCTTAAATACGGTTTGAAAGGAGGGCCTTCTACGGAAGGAGTACCTGAGTC | 900 |
| <b>MA 246038 Method S</b> | 841 | TTATCGTCGCCTTAAATACGGTTTGAAAGGAGGGCCTTCTACGGAAGGAGTACCTGAGTC | 900 |
| <b>MA 246038 Method E</b> | 841 | TTATCGTCGCCTTAAATACGGTTTGAAAGGAGGGCCTTCTACGGAAGGAGTACCTGAGTC | 900 |
| <b>MA 246038 Method K</b> | 841 | TTATCGTCGCCTTAAATACGGTTTGAAAGGAGGGCCTTCTACGGAAGGAGTACCTGAGTC | 900 |
| <b>MA 246038 Method N</b> | 841 | TTATCGTCGCCTTAAATACGGTTTGAAAGGAGGGCCTTCTACGGAAGGAGTACCTGAGTC | 900 |

|                           |     |                                                              |     |
|---------------------------|-----|--------------------------------------------------------------|-----|
| <b>MA 246038 MiSeq</b>    | 901 | CATGAGGGAAGAGTACCGGCAGGAACAGCAGAGTGCTGTGGATGTTGACGATGGTCATTT | 960 |
| <b>MA 246038 Method A</b> | 901 | CATGAGGGAAGAGTACCGGCAGGAACAGCAGAGTGCTGTGGATGTTGACGATGGTCATTT | 960 |
| <b>MA 246038 Method S</b> | 901 | CATGAGGGAAGAGTACCGGCAGGAACAGCAGAGTGCTGTGGATGTTGACGATGGTCATTT | 960 |
| <b>MA 246038 Method E</b> | 901 | CATGAGGGAAGAGTACCGGCAGGAACAGCAGAGTGCTGTGGATGTTGACGATGGTCATTT | 960 |
| <b>MA 246038 Method K</b> | 901 | CATGAGGGAAGAGTACCGGCAGGAACAGCAGAGTGCTGTGGATGTTGACGATGGTCATTT | 960 |
| <b>MA 246038 Method N</b> | 901 | CATGAGGGAAGAGTACCGGCAGGAACAGCAGAGTGCTGTGGATGTTGACGATGGTCATTT | 960 |

|                           |            |                        |            |
|---------------------------|------------|------------------------|------------|
| <b>MA 246038 MiSeq</b>    | <i>961</i> | TGTCAACATAGAGCTGGAGTAA | <i>982</i> |
| <b>MA 246038 Method A</b> | <i>961</i> | TGTCAACATAGAGCTGGAGTAA | <i>982</i> |
| <b>MA 246038 Method S</b> | <i>961</i> | TGTCAACATAGAGCTGGAGTAA | <i>982</i> |
| <b>MA 246038 Method E</b> | <i>961</i> | TGTCAACATAGAGCTGGAGTAA | <i>982</i> |
| <b>MA 246038 Method K</b> | <i>961</i> | TGTCAACATAGAGCTGGAGTAA | <i>982</i> |
| <b>MA 246038 Method N</b> | <i>961</i> | TGTCAACATAGAGCTGGAGTAA | <i>982</i> |
