# Supplementary material for: An Evaluation of Avian Influenza Virus Whole Genome Sequencing Approaches Using Nanopore Technology
Source: Preprints.org preprint supplement (doi:10.20944/preprints202301.0480.v1), 2023-01-26
Supplement: Supplementary file 47 [file supplementary]

| 245467   | PB2   | PB1 | PA | H5 | NP | N1 | MA | NS |
|----------|-------|-----|----|----|----|----|----|----|
| Method A | -     | -   | -  | -  | -  | -  | -  | -  |
| Method S | -     | 1   | -  | -  | -  | -  | -  | -  |
| Method E | 55    | 38  | 24 | 22 | 22 | 10 | 6  | 10 |
| Method K | -     | -   | -  | -  | -  | -  | -  | -  |
| Method N | del 7 | -   | -  | -  | -  | -  | -  | -  |
