# Supplementary material for: An Evaluation of Avian Influenza Virus Whole Genome Sequencing Approaches Using Nanopore Technology
Source: Preprints.org preprint supplement (doi:10.20944/preprints202301.0480.v1), 2023-01-26
Supplement: Supplementary file 48 [file supplementary]

|                                   | Method A                 | Method S                  | Method E                           | Method K                   | Method N                 |
|-----------------------------------|--------------------------|---------------------------|------------------------------------|----------------------------|--------------------------|
| Description                       | Native barcoding         | PCR barcoding             | Rapid barcoding                    | Rapid PCR barcoding        | Native barcoding         |
| Kit name                          | SQK-LSK109               | SQK-PBK004                | SQK-RBK004                         | SQK-RBP004                 | SQK-LSK109 (Io-Cost)     |
| <b>Step</b>                       | <b>RT-PCR</b>            | <b>RT-PCR</b>             | <b>RT-PCR</b>                      | <b>RT-PCR</b>              | <b>RT-PCR</b>            |
| Kit                               | SuperScript III Platinum | SuperScript III Platinum  | SuperScript III Platinum           | SuperScript III Platinum   | SuperScript III Platinum |
| Primer sets used                  | Set 1                    | Set 2                     | Set 3                              | Set 4                      | Set 4                    |
| Cycling conditions                | [13]                     | [13]                      | [20]                               | [28]                       | [13]                     |
| Time (min) incl bead purification | 268                      | 268                       | 233                                | 278                        | 278                      |
| <b>Step</b>                       | <b>End Prep</b>          |                           |                                    |                            | <b>End Prep</b>          |
| Kit                               | NEBNext FFPE & Ultra II  |                           |                                    |                            | NEBNext Ultra II         |
| Time (min) incl bead purification | 23                       |                           |                                    |                            | 10                       |
| <b>Step</b>                       | <b>Barcoding</b>         | <b>PCR Barcoding</b>      | <b>Fragmentation and Barcoding</b> | <b>Rapid PCR Barcoding</b> | <b>Barcoding</b>         |
| Kit                               | NEB Blunt/TA ligase      | NEB LongAmp Hot Start Taq | ONT Fragmentation Mix              | NEB LongAmp Hot Start Taq  | NEB Blunt/TA ligase      |
| Time (min) incl bead purification | 23                       | 223                       | 13                                 | 37.5                       | 45                       |
| <b>Step</b>                       | <b>Adaptor Ligation</b>  | <b>RAP</b>                | <b>RAP</b>                         | <b>RAP</b>                 | <b>Adaptor Ligation</b>  |
| Kit                               | NEB Quick T4 DNA Ligase  | ONT Rapid Adaptor         | ONT Rapid Adaptor                  | ONT Rapid Adaptor          | NEB Quick T4 DNA Ligase  |
| Time (min) incl bead purification | 23                       | 5                         | 5                                  | 5                          | 23                       |
| <b># Steps</b>                    | <b>4</b>                 | <b>3</b>                  | <b>3</b>                           | <b>3</b>                   | <b>4</b>                 |
| <b># bead purifications</b>       | <b>4</b>                 | <b>2</b>                  | <b>2</b>                           | <b>2</b>                   | <b>3</b>                 |
| <b>Total hands-on time (h)</b>    | <b>1.2</b>               | <b>3.8</b>                | <b>0.3</b>                         | <b>0.7</b>                 | <b>1.3</b>               |
| <b>Total prep time (h)</b>        | <b>5.6</b>               | <b>8.3</b>                | <b>4.2</b>                         | <b>5.3</b>                 | <b>5.9</b>               |
