# Supplementary material for: An Evaluation of Avian Influenza Virus Whole Genome Sequencing Approaches Using Nanopore Technology
Source: Preprints.org preprint supplement (doi:10.20944/preprints202301.0480.v1), 2023-01-26
Supplement: Supplementary file 50 [file supplementary]

## Formatted Alignments

|                    |     |                                                               |     |
|--------------------|-----|---------------------------------------------------------------|-----|
| H5 245625 MiSeq    | 1   | ATGGAGAACATAGTACTACTTCTTGCAATAATTAGCCTTGTTAAAAGTGATCAGATTTGC  | 60  |
| H5 245626 Method A | 1   | ATGGAGAACATAGTACTACTTCTTGCAATAATTAGCCTTGTTAAAAGTGATCAGATTTGC  | 60  |
| H5 245626 Method K | 1   | ATGGAGAACATAGTACTACTTCTTGCAATAATTAGCCTTGTTAAAAGTGATCAGATTTGC  | 60  |
| H5 245626 Method N | 1   | ATGGAGAACATAGTACTACTTCTTGCAATAATTAGCCTTGTTAAAAGTGATCAGATTTGC  | 60  |
|                    |     |                                                               |     |
| H5 245625 MiSeq    | 61  | ATTGGTTACCATGCAAACAATTTCGACAGAGCAAGTTGACACGATAATGGAAAAGAACGTC | 120 |
| H5 245626 Method A | 61  | ATTGGTTACCATGCAAACAATTTCGACAGAGCAAGTTGACACGATAATGGAAAAGAACGTC | 120 |
| H5 245626 Method K | 61  | ATTGGTTACCATGCAAACAATTTCGACAGAGCAAGTTGACACGATAATGGAAAAGAACGTC | 120 |
| H5 245626 Method N | 61  | ATTGGTTACCATGCAAACAATTTCGACAGAGCAAGTTGACACGATAATGGAAAAGAACGTC | 120 |
|                    |     |                                                               |     |
| H5 245625 MiSeq    | 121 | ACTGTTACACATGCCCAAGACATACTGGAAAAAACACACAACGGGAAGCTCTGTGATCTA  | 180 |
| H5 245626 Method A | 121 | ACTGTTACACATGCCCAAGACATACTGGAAAAAACACACAACGGGAAGCTCTGTGATCTA  | 180 |
| H5 245626 Method K | 121 | ACTGTTACACATGCCCAAGACATACTGGAAAAAACACACAACGGGAAGCTCTGTGATCTA  | 180 |
| H5 245626 Method N | 121 | ACTGTTACACATGCCCAAGACATACTGGAAAAAACACACAACGGGAAGCTCTGTGATCTA  | 180 |
|                    |     |                                                               |     |
| H5 245625 MiSeq    | 181 | AATGGGGTGAAGCCACTGATTTTAAAGGATTGTAGTGTAGCTGGATGGCTCCTCGGGAAC  | 240 |
| H5 245626 Method A | 181 | AATGGGGTGAAGCCACTGATTTTAAAGGATTGTAGTGTAGCTGGATGGCTCCTCGGGAAC  | 240 |
| H5 245626 Method K | 181 | AATGGGGTGAAGCCACTGATTTTAAAGGATTGTAGTGTAGCTGGATGGCTCCTCGGGAAC  | 240 |
| H5 245626 Method N | 181 | AATGGGGTGAAGCCACTGATTTTAAAGGATTGTAGTGTAGCTGGATGGCTCCTCGGGAAC  | 240 |
|                    |     |                                                               |     |
| H5 245625 MiSeq    | 241 | CCAATGTGCGACGAATTCATCAGAGTGCCGGAATGGTCCTACATAGTGGAGCGGGCTAAC  | 300 |
| H5 245626 Method A | 241 | CCAATGTGCGACGAATTCATCAGAGTGCCGGAATGGTCCTACATAGTGGAGCGGGCTAAC  | 300 |
| H5 245626 Method K | 241 | CCAATGTGCGACGAATTCATCAGAGTGCCGGAATGGTCCTACATAGTGGAGCGGGCTAAC  | 300 |
| H5 245626 Method N | 241 | CCAATGTGCGACGAATTCATCAGAGTGCCGGAATGGTCCTACATAGTGGAGCGGGCTAAC  | 300 |
|                    |     |                                                               |     |
| H5 245625 MiSeq    | 301 | CCAGCTAATGACCTCTGTTACCCAGGGAGCCTCAATGACTATGAAGAAGTGAACACATG   | 360 |
| H5 245626 Method A | 301 | CCAGCTAATGACCTCTGTTACCCAGGGAGCCTCAATGACTATGAAGAAGTGAACACATG   | 360 |
| H5 245626 Method K | 301 | CCAGCTAATGACCTCTGTTACCCAGGGAGCCTCAATGACTATGAAGAAGTGAACACATG   | 360 |
| H5 245626 Method N | 301 | CCAGCTAATGACCTCTGTTACCCAGGGAGCCTCAATGACTATGAAGAAGTGAACACATG   | 360 |

|                    |     |                                                               |     |
|--------------------|-----|---------------------------------------------------------------|-----|
| H5 245625 MiSeq    | 361 | TTGAGCAGAATAAATCATTTTTGAGAAGATTCTGATCATTCCCAAGAGTTCCTGGCCAAAT | 420 |
| H5 245626 Method A | 361 | TTGAGCAGAATAAATCATTTTTGAGAAGATTCTGATCATTCCCAAGAGTTCCTGGCCAAAT | 420 |
| H5 245626 Method K | 361 | TTGAGCAGAATAAATCATTTTTGAGAAGATTCTGATCATTCCCAAGAGTTCCTGGCCAAAT | 420 |
| H5 245626 Method N | 361 | TTGAGCAGAATAAATCATTTTTGAGAAGATTCTGATCATTCCCAAGAGTTCCTGGCCAAAT | 420 |

|                    |     |                                                               |     |
|--------------------|-----|---------------------------------------------------------------|-----|
| H5 245625 MiSeq    | 421 | CATGAAACATCACTAGGGGTGAGCGCAGCTTGTCCATACCAGGGAGCGCCCTCCTTTTTTC | 480 |
| H5 245626 Method A | 421 | CATGAAACATCACTAGGGGTGAGCGCAGCTTGTCCATACCAGGGAGCGCCCTCCTTTTTTC | 480 |
| H5 245626 Method K | 421 | CATGAAACATCACTAGGGGTGAGCGCAGCTTGTCCATACCAGGGAGCGCCCTCCTTTTTTC | 480 |
| H5 245626 Method N | 421 | CATGAAACATCACTAGGGGTGAGCGCAGCTTGTCCATACCAGGGAGCGCCCTCCTTTTTTC | 480 |

|                    |     |                                                              |     |
|--------------------|-----|--------------------------------------------------------------|-----|
| H5 245625 MiSeq    | 481 | AGAAATGTGGTGTGGCTTATCAAAAAGAACGATGCATACCCAACAATAAAGATAAGCTAC | 540 |
| H5 245626 Method A | 481 | AGAAATGTGGTGTGGCTTATCAAAAAGAACGATGCATACCCAACAATAAAGATAAGCTAC | 540 |
| H5 245626 Method K | 481 | AGAAATGTGGTGTGGCTTATCAAAAAGAACGATGCATACCCAACAATAAAGATAAGCTAC | 540 |
| H5 245626 Method N | 481 | AGAAATGTGGTGTGGCTTATCAAAAAGAACGATGCATACCCAACAATAAAGATAAGCTAC | 540 |

|                    |     |                                                              |     |
|--------------------|-----|--------------------------------------------------------------|-----|
| H5 245625 MiSeq    | 541 | AATAATACCAATCGGGAAGATCTCTTGATACTGTGGGGGATTCATCATTCCAACAATGCA | 600 |
| H5 245626 Method A | 541 | AATAATACCAATCGGGAAGATCTCTTGATACTGTGGGGGATTCATCATTCCAACAATGCA | 600 |
| H5 245626 Method K | 541 | AATAATACCAATCGGGAAGATCTCTTGATACTGTGGGGGATTCATCATTCCAACAATGCA | 600 |
| H5 245626 Method N | 541 | AATAATACCAATCGGGAAGATCTCTTGATACTGTGGGGGATTCATCATTCCAACAATGCA | 600 |

|                    |     |                                                               |     |
|--------------------|-----|---------------------------------------------------------------|-----|
| H5 245625 MiSeq    | 601 | GAAGAGCAGACAAATCTCTACAAAAACCCAACCACCTACATTTTCAGTTGGAACATCAACT | 660 |
| H5 245626 Method A | 601 | GAAGAGCAGACAAATCTCTACAAAAACCCAACCACCTACATTTTCAGTTGGAACATCAACT | 660 |
| H5 245626 Method K | 601 | GAAGAGCAGACAAATCTCTACAAAAACCCAACCACCTACATTTTCAGTTGGAACATCAACT | 660 |
| H5 245626 Method N | 601 | GAAGAGCAGACAAATCTCTACAAAAACCCAACCACCTACATTTTCAGTTGGAACATCAACT | 660 |

|                    |     |                                                               |     |
|--------------------|-----|---------------------------------------------------------------|-----|
| H5 245625 MiSeq    | 661 | TTAAACCAGAGGTTGGCACCAAAAAATAGCTACTAGATCCCAAGTAAACGGGCAACGTGGA | 720 |
| H5 245626 Method A | 661 | TTAAACCAGAGGTTGGCACCAAAAAATAGCTACTAGATCCCAAGTAAACGGGCAACGTGGA | 720 |
| H5 245626 Method K | 661 | TTAAACCAGAGGTTGGCACCAAAAAATAGCTACTAGATCCCAAGTAAACGGGCAACGTGGA | 720 |
| H5 245626 Method N | 661 | TTAAACCAGAGGTTGGCACCAAAAAATAGCTACTAGATCCCAAGTAAACGGGCAACGTGGA | 720 |

|                    |      |                                                               |      |
|--------------------|------|---------------------------------------------------------------|------|
| H5 245625 MiSeq    | 721  | AGAATGGACTTCTTCTGGACAATCTTAAAACCAGATGATGCAATCCATTTTCGAGAGTAAT | 780  |
| H5 245626 Method A | 721  | AGAATGGACTTCTTCTGGACAATCTTAAAACCAGATGATGCAATCCATTTTCGAGAGTAAT | 780  |
| H5 245626 Method K | 721  | AGAATGGACTTCTTCTGGACAATCTTAAAACCAGATGATGCAATCCATTTTCGAGAGTAAT | 780  |
| H5 245626 Method N | 721  | AGAATGGACTTCTTCTGGACAATCTTAAAACCAGATGATGCAATCCATTTTCGAGAGTAAT | 780  |
|                    |      |                                                               |      |
| H5 245625 MiSeq    | 781  | GGAAATTTTCATTGCTCCAGAATATGCATACAAAATTGTCAAGAAAGGGGACTCAACAATT | 840  |
| H5 245626 Method A | 781  | GGAAATTTTCATTGCTCCAGAATATGCATACAAAATTGTCAAGAAAGGGGACTCAACAATT | 840  |
| H5 245626 Method K | 781  | GGAAATTTTCATTGCTCCAGAATATGCATACAAAATTGTCAAGAAAGGGGACTCAACAATT | 840  |
| H5 245626 Method N | 781  | GGAAATTTTCATTGCTCCAGAATATGCATACAAAATTGTCAAGAAAGGGGACTCAACAATT | 840  |
|                    |      |                                                               |      |
| H5 245625 MiSeq    | 841  | ATGAAAAGTGGAGTGGAATATGGCCACTGCAACACCAAATGTCAAACCCCAGTAGGTGCG  | 900  |
| H5 245626 Method A | 841  | ATGAAAAGTGGAGTGGAATATGGCCACTGCAACACCAAATGTCAAACCCCAGTAGGTGCG  | 900  |
| H5 245626 Method K | 841  | ATGAAAAGTGGAGTGGAATATGGCCACTGCAACACCAAATGTCAAACCCCAGTAGGTGCG  | 900  |
| H5 245626 Method N | 841  | ATGAAAAGTGGAGTGGAATATGGCCACTGCAACACCAAATGTCAAACCCCAGTAGGTGCG  | 900  |
|                    |      |                                                               |      |
| H5 245625 MiSeq    | 901  | ATAAATTCTAGTATGCCATTCCACAACATACATCCTCTCACCATTGGGGAATGCCCCAAA  | 960  |
| H5 245626 Method A | 901  | ATAAATTCTAGTATGCCATTCCACAACATACATCCTCTCACCATTGGGGAATGCCCCAAA  | 960  |
| H5 245626 Method K | 901  | ATAAATTCTAGTATGCCATTCCACAACATACATCCTCTCACCATTGGGGAATGCCCCAAA  | 960  |
| H5 245626 Method N | 901  | ATAAATTCTAGTATGCCATTCCACAACATACATCCTCTCACCATTGGGGAATGCCCCAAA  | 960  |
|                    |      |                                                               |      |
| H5 245625 MiSeq    | 961  | TACGTGAAGTCAAACAAGTTGGTCCTTGCGACTGGGCTCAGAAATAGTCCTCTAAGAGAA  | 1020 |
| H5 245626 Method A | 961  | TACGTGAAGTCAAACAAGTTGGTCCTTGCGACTGGGCTCAGAAATAGTCCTCTAAGAGAA  | 1020 |
| H5 245626 Method K | 961  | TACGTGAAGTCAAACAAGTTGGTCCTTGCGACTGGGCTCAGAAATAGTCCTCTAAGAGAA  | 1020 |
| H5 245626 Method N | 961  | TACGTGAAGTCAAACAAGTTGGTCCTTGCGACTGGGCTCAGAAATAGTCCTCTAAGAGAA  | 1020 |
|                    |      |                                                               |      |
| H5 245625 MiSeq    | 1021 | AAGAGAAGAAAAAGAGGCCTGTTTGGGGCGATAGCAGGGTTTATAGAGGGAGGATGGCAG  | 1080 |
| H5 245626 Method A | 1021 | AAGAGAAGAAAAAGAGGCCTGTTTGGGGCGATAGCAGGGTTTATAGAGGGAGGATGGCAG  | 1080 |
| H5 245626 Method K | 1021 | AAGAGAAGAAAAAGAGGCCTGTTTGGGGCGATAGCAGGGTTTATAGAGGGAGGATGGCAG  | 1080 |
| H5 245626 Method N | 1021 | AAGAGAAGAAAAAGAGGCCTGTTTGGGGCGATAGCAGGGTTTATAGAGGGAGGATGGCAG  | 1080 |

|                    |      |                                                              |      |
|--------------------|------|--------------------------------------------------------------|------|
| H5 245625 MiSeq    | 1081 | GGAATGGTTGATGGTTGGTATGGGTACCATCATAGCAATGAGCAGGGGAGTGGGTACGCT | 1140 |
| H5 245626 Method A | 1081 | GGAATGGTTGATGGTTGGTATGGGTACCATCATAGCAATGAGCAGGGGAGTGGGTACGCT | 1140 |
| H5 245626 Method K | 1081 | GGAATGGTTGATGGTTGGTATGGGTACCATCATAGCAATGAGCAGGGGAGTGGGTACGCT | 1140 |
| H5 245626 Method N | 1081 | GGAATGGTTGATGGTTGGTATGGGTACCATCATAGCAATGAGCAGGGGAGTGGGTACGCT | 1140 |

|                    |      |                                                              |      |
|--------------------|------|--------------------------------------------------------------|------|
| H5 245625 MiSeq    | 1141 | GCGGACAAAGAATCCACCCAAAAGGCAATAGATGGAGTTACCAATAAGGTCAACTCAATC | 1200 |
| H5 245626 Method A | 1141 | GCGGACAAAGAATCCACCCAAAAGGCAATAGATGGAGTTACCAATAAGGTCAACTCAATC | 1200 |
| H5 245626 Method K | 1141 | GCGGACAAAGAATCCACCCAAAAGGCAATAGATGGAGTTACCAATAAGGTCAACTCAATC | 1200 |
| H5 245626 Method N | 1141 | GCGGACAAAGAATCCACCCAAAAGGCAATAGATGGAGTTACCAATAAGGTCAACTCAATC | 1200 |

|                    |      |                                                              |      |
|--------------------|------|--------------------------------------------------------------|------|
| H5 245625 MiSeq    | 1201 | ATTGACAAAATGAACACTCAATTTGAGGCAGTTGGAAGGGAGTTTAATAACTTAGAAAGG | 1260 |
| H5 245626 Method A | 1201 | ATTGACAAAATGAACACTCAATTTGAGGCAGTTGGAAGGGAGTTTAATAACTTAGAAAGG | 1260 |
| H5 245626 Method K | 1201 | ATTGACAAAATGAACACTCAATTTGAGGCAGTTGGAAGGGAGTTTAATAACTTAGAAAGG | 1260 |
| H5 245626 Method N | 1201 | ATTGACAAAATGAACACTCAATTTGAGGCAGTTGGAAGGGAGTTTAATAACTTAGAAAGG | 1260 |

|                    |      |                                                               |      |
|--------------------|------|---------------------------------------------------------------|------|
| H5 245625 MiSeq    | 1261 | AGGATAGAGAATTTGAACAAGAAAATGGAAGACGGATTCCCTAGATGTCTGGACCTATAAT | 1320 |
| H5 245626 Method A | 1261 | AGGATAGAGAATTTGAACAAGAAAATGGAAGACGGATTCCCTAGATGTCTGGACCTATAAT | 1320 |
| H5 245626 Method K | 1261 | AGGATAGAGAATTTGAACAAGAAAATGGAAGACGGATTCCCTAGATGTCTGGACCTATAAT | 1320 |
| H5 245626 Method N | 1261 | AGGATAGAGAATTTGAACAAGAAAATGGAAGACGGATTCCCTAGATGTCTGGACCTATAAT | 1320 |

|                    |      |                                                              |      |
|--------------------|------|--------------------------------------------------------------|------|
| H5 245625 MiSeq    | 1321 | GCTGAACTTCTAGTTCTCATGGAAAACGAGAGGACTCTAGATTTCCATGATTCAAATGTC | 1380 |
| H5 245626 Method A | 1321 | GCTGAACTTCTAGTTCTCATGGAAAACGAGAGGACTCTAGATTTCCATGATTCAAATGTC | 1380 |
| H5 245626 Method K | 1321 | GCTGAACTTCTAGTTCTCATGGAAAACGAGAGGACTCTAGATTTCCATGATTCAAATGTC | 1380 |
| H5 245626 Method N | 1321 | GCTGAACTTCTAGTTCTCATGGAAAACGAGAGGACTCTAGATTTCCATGATTCAAATGTC | 1380 |

|                    |      |                                                               |      |
|--------------------|------|---------------------------------------------------------------|------|
| H5 245625 MiSeq    | 1381 | AAGAACCTTTACGACAAAGTCAGATTACAGCTTAGGGATAATGCAAAGGAGCTGGGTAAAC | 1440 |
| H5 245626 Method A | 1381 | AAGAACCTTTACGACAAAGTCAGATTACAGCTTAGGGATAATGCAAAGGAGCTGGGTAAAC | 1440 |
| H5 245626 Method K | 1381 | AAGAACCTTTACGACAAAGTCAGATTACAGCTTAGGGATAATGCAAAGGAGCTGGGTAAAC | 1440 |
| H5 245626 Method N | 1381 | AAGAACCTTTACGACAAAGTCAGATTACAGCTTAGGGATAATGCAAAGGAGCTGGGTAAAC | 1440 |

|                    |      |                                                               |      |
|--------------------|------|---------------------------------------------------------------|------|
| H5 245625 MiSeq    | 1441 | GGCTGTTTTCGAATTCTATCACAAATGTGATAATGAATGTATGGAAAGTGTGAGAAATGGG | 1500 |
| H5 245626 Method A | 1441 | GGCTGTTTTCGAATTCTATCACAAATGTGATAATGAATGTATGGAAAGTGTGAGAAATGGG | 1500 |
| H5 245626 Method K | 1441 | GGCTGTTTTCGAATTCTATCACAAATGTGATAATGAATGTATGGAAAGTGTGAGAAATGGG | 1500 |
| H5 245626 Method N | 1441 | GGCTGTTTTCGAATTCTATCACAAATGTGATAATGAATGTATGGAAAGTGTGAGAAATGGG | 1500 |

|                    |      |                                                              |      |
|--------------------|------|--------------------------------------------------------------|------|
| H5 245625 MiSeq    | 1501 | ACGTATGACTACCCTCAGTATTCAGAAGAAGCAAGATTAAAAAGAGAAGAAATAAGCGGA | 1560 |
| H5 245626 Method A | 1501 | ACGTATGACTACCCTCAGTATTCAGAAGAAGCAAGATTAAAAAGAGAAGAAATAAGCGGA | 1560 |
| H5 245626 Method K | 1501 | ACGTATGACTACCCTCAGTATTCAGAAGAAGCAAGATTAAAAAGAGAAGAAATAAGCGGA | 1560 |
| H5 245626 Method N | 1501 | ACGTATGACTACCCTCAGTATTCAGAAGAAGCAAGATTAAAAAGAGAAGAAATAAGCGGA | 1560 |

|                    |      |                                                              |      |
|--------------------|------|--------------------------------------------------------------|------|
| H5 245625 MiSeq    | 1561 | GTGAAATTAGAATCAGTAGGAACTTACCAGATACTGTCAATTTATTCAACAGCGGCAAGT | 1620 |
| H5 245626 Method A | 1561 | GTGAAATTAGAATCAGTAGGAACTTACCAGATACTGTCAATTTATTCAACAGCGGCAAGT | 1620 |
| H5 245626 Method K | 1561 | GTGAAATTAGAATCAGTAGGAACTTACCAGATACTGTCAATTTATTCAACAGCGGCAAGT | 1620 |
| H5 245626 Method N | 1561 | GTGAAATTAGAATCAGTAGGAACTTACCAGATACTGTCAATTTATTCAACAGCGGCAAGT | 1620 |

|                    |      |                                                              |      |
|--------------------|------|--------------------------------------------------------------|------|
| H5 245625 MiSeq    | 1621 | TCCCTAGCACTGGCAATCATGATGGCTGGTCTATCTTTATGGATGTGCTCCAATGGGTCG | 1680 |
| H5 245626 Method A | 1621 | TCCCTAGCACTGGCAATCATGATGGCTGGTCTATCTTTATGGATGTGCTCCAATGGGTCG | 1680 |
| H5 245626 Method K | 1621 | TCCCTAGCACTGGCAATCATGATGGCTGGTCTATCTTTATGGATGTGCTCCAATGGGTCG | 1680 |
| H5 245626 Method N | 1621 | TCCCTAGCACTGGCAATCATGATGGCTGGTCTATCTTTATGGATGTGCTCCAATGGGTCG | 1680 |

|                    |      |                          |      |
|--------------------|------|--------------------------|------|
| H5 245625 MiSeq    | 1681 | TTACAGTGCAGAATTTGCATTTAG | 1704 |
| H5 245626 Method A | 1681 | TTACAGTGCAGAATTTGCATTTAG | 1704 |
| H5 245626 Method K | 1681 | TTACAGTGCAGAATTTGCATTTAG | 1704 |
| H5 245626 Method N | 1681 | TTACAGTGCAGAATTTGCATTTAG | 1704 |
