# Supplementary material for: An Evaluation of Avian Influenza Virus Whole Genome Sequencing Approaches Using Nanopore Technology
Source: Preprints.org preprint supplement (doi:10.20944/preprints202301.0480.v1), 2023-01-26
Supplement: Supplementary file 51 [file supplementary]

## Formatted Alignments

|                           |   |                                                              |    |
|---------------------------|---|--------------------------------------------------------------|----|
| <b>H5 246038 MiSeq</b>    | 1 | ATGGAGAACATAGTACTACTTCTTGCAATAGTTAGCCTTGTTAAAAGTGATCAGATTTGC | 60 |
| <b>H5 246038 Method A</b> | 1 | ATGGAGAACATAGTACTACTTCTTGCAATAGTTAGCCTTGTTAAAAGTGATCAGATTTGC | 60 |
| <b>H5 246038 Method S</b> | 1 | ATGGAGAACATAGTACTACTTCTTGCAATAGTTAGCCTTGTTAAAAGTGATCAGATTTGC | 60 |
| <b>H5 246038 Method E</b> | 1 | ATGGAGAACATAGTACTACTTCTTGCAATAGTTAGCCTTGTTAAAAGTGATCAGATTTGC | 60 |
| <b>H5 246038 Method K</b> | 1 | ATGGAGAACATAGTACTACTTCTTGCAATAGTTAGCCTTGTTAAAAGTGATCAGATTTGC | 60 |
| <b>H5 246038 Method N</b> | 1 | ATGGAGAACATAGTACTACTTCTTGCAATAGTTAGCCTTGTTAAAAGTGATCAGATTTGC | 60 |

|                           |    |                                                               |     |
|---------------------------|----|---------------------------------------------------------------|-----|
| <b>H5 246038 MiSeq</b>    | 61 | ATTGGTTACCATGCAAACAATTTCGACAGAGCAAGTTGACACGATAATGGAAAAGAACGTC | 120 |
| <b>H5 246038 Method A</b> | 61 | ATTGGTTACCATGCAAACAATTTCGACAGAGCAAGTTGACACGATAATGGAAAAGAACGTC | 120 |
| <b>H5 246038 Method S</b> | 61 | ATTGGTTACCATGCAAACAATTTCGACAGAGCAAGTTGACACGATAATGGAAAAGAACGTC | 120 |
| <b>H5 246038 Method E</b> | 61 | ATTGGTTACCATGCAAACAATTTCGACAGAGCAAGTTGACACGATAATGGAAAAGAACGTC | 120 |
| <b>H5 246038 Method K</b> | 61 | ATTGGTTACCATGCAAACAATTTCGACAGAGCAAGTTGACACGATAATGGAAAAGAACGTC | 120 |
| <b>H5 246038 Method N</b> | 61 | ATTGGTTACCATGCAAACAATTTCGACAGAGCAAGTTGACACGATAATGGAAAAGAACGTC | 120 |

|                           |     |                                                              |     |
|---------------------------|-----|--------------------------------------------------------------|-----|
| <b>H5 246038 MiSeq</b>    | 121 | ACTGTTACACATGCCCAAGACATACTGGAAAAAACACACAACGGGAAGCTCTGTGATCTA | 180 |
| <b>H5 246038 Method A</b> | 121 | ACTGTTACACATGCCCAAGACATACTGGAAAAAACACACAACGGGAAGCTCTGTGATCTA | 180 |
| <b>H5 246038 Method S</b> | 121 | ACTGTTACACATGCCCAAGACATACTGGAAAAAACACACAACGGGAAGCTCTGTGATCTA | 180 |
| <b>H5 246038 Method E</b> | 121 | ACTGTTACACATGCCCAAGACATACTGGAAAAAACACACAACGGGAAGCTCTGTGATCTA | 180 |
| <b>H5 246038 Method K</b> | 121 | ACTGTTACACATGCCCAAGACATACTGGAAAAAACACACAACGGGAAGCTCTGTGATCTA | 180 |
| <b>H5 246038 Method N</b> | 121 | ACTGTTACACATGCCCAAGACATACTGGAAAAAACACACAACGGGAAGCTCTGTGATCTA | 180 |

|                           |     |                                                              |     |
|---------------------------|-----|--------------------------------------------------------------|-----|
| <b>H5 246038 MiSeq</b>    | 181 | AATGGGGTGAAGCCTCTGATTTTAAAGGATTGTAGTGTAGCTGGATGGCTCCTCGGAAAT | 240 |
| <b>H5 246038 Method A</b> | 181 | AATGGGGTGAAGCCTCTGATTTTAAAGGATTGTAGTGTAGCTGGATGGCTCCTCGGAAAT | 240 |
| <b>H5 246038 Method S</b> | 181 | AATGGGGTGAAGCCTCTGATTTTAAAGGATTGTAGTGTAGCTGGATGGCTCCTCGGAAAT | 240 |
| <b>H5 246038 Method E</b> | 181 | AATGGGGTGAAGCCTCTGATTTTAAAGGATTGTAGTGTAGCTGGATGGCTCCTCGGAAAT | 240 |
| <b>H5 246038 Method K</b> | 181 | AATGGGGTGAAGCCTCTGATTTTAAAGGATTGTAGTGTAGCTGGATGGCTCCTCGGAAAT | 240 |
| <b>H5 246038 Method N</b> | 181 | AATGGGGTGAAGCCTCTGATTTTAAAGGATTGTAGTGTAGCTGGATGGCTCCTCGGAAAT | 240 |

|                           |     |                                                              |     |
|---------------------------|-----|--------------------------------------------------------------|-----|
| <b>H5 246038 MiSeq</b>    | 241 | CCAATGTGCGACGAATTCATCAGAGTGCCGGAATGGTCCTACATAGTGGAGCGGGCTAAC | 300 |
| <b>H5 246038 Method A</b> | 241 | CCAATGTGCGACGAATTCATCAGAGTGCCGGAATGGTCCTACATAGTGGAGCGGGCTAAC | 300 |
| <b>H5 246038 Method S</b> | 241 | CCAATGTGCGACGAATTCATCAGAGTGCCGGAATGGTCCTACATAGTGGAGCGGGCTAAC | 300 |
| <b>H5 246038 Method E</b> | 241 | CCAATGTGCGACGAATTCATCAGAGTGCCGGAATGGTCCTACATAGTGGAGCGGGCTAAC | 300 |
| <b>H5 246038 Method K</b> | 241 | CCAATGTGCGACGAATTCATCAGAGTGCCGGAATGGTCCTACATAGTGGAGCGGGCTAAC | 300 |
| <b>H5 246038 Method N</b> | 241 | CCAATGTGCGACGAATTCATCAGAGTGCCGGAATGGTCCTACATAGTGGAGCGGGCTAAC | 300 |

|                           |     |                                                              |     |
|---------------------------|-----|--------------------------------------------------------------|-----|
| <b>H5 246038 MiSeq</b>    | 301 | CCAGCTAATGACCTCTGTTACCCAGGGAGCCTCAATGACTATGAAGAACTGAAACACATG | 360 |
| <b>H5 246038 Method A</b> | 301 | CCAGCTAATGACCTCTGTTACCCAGGGAGCCTCAATGACTATGAAGAACTGAAACACATG | 360 |
| <b>H5 246038 Method S</b> | 301 | CCAGCTAATGACCTCTGTTACCCAGGGAGCCTCAATGACTATGAAGAACTGAAACACATG | 360 |
| <b>H5 246038 Method E</b> | 301 | CCAGCTAATGACCTCTGTTACCCAGGGAGCCTCAATGACTATGAAGAACTGAAACACATG | 360 |
| <b>H5 246038 Method K</b> | 301 | CCAGCTAATGACCTCTGTTACCCAGGGAGCCTCAATGACTATGAAGAACTGAAACACATG | 360 |
| <b>H5 246038 Method N</b> | 301 | CCAGCTAATGACCTCTGTTACCCAGGGAGCCTCAATGACTATGAAGAACTGAAACACATG | 360 |

|                           |     |                                                                |     |
|---------------------------|-----|----------------------------------------------------------------|-----|
| <b>H5 246038 MiSeq</b>    | 361 | TTGAGCAGAATAAATCATTTTGTGAGAAGATTCTGATCATCCCCAAGAGTTCCTGGCCAAAT | 420 |
| <b>H5 246038 Method A</b> | 361 | TTGAGCAGAATAAATCATTTTGTGAGAAGATTCTGATCATCCCCAAGAGTTCCTGGCCAAAT | 420 |
| <b>H5 246038 Method S</b> | 361 | TTGAGCAGAATAAATCATTTTGTGAGAAGATTCTGATCATCCCCAAGAGTTCCTGGCCAAAT | 420 |
| <b>H5 246038 Method E</b> | 361 | TTGAGCAGAATAAATCATTTTGTGAGAAGATTCTGATCATCCCCAAGAGTTCCTGGCCAAAT | 420 |
| <b>H5 246038 Method K</b> | 361 | TTGAGCAGAATAAATCATTTTGTGAGAAGATTCTGATCATCCCCAAGAGTTCCTGGCCAAAT | 420 |
| <b>H5 246038 Method N</b> | 361 | TTGAGCAGAATAAATCATTTTGTGAGAAGATTCTGATCATCCCCAAGAGTTCCTGGCCAAAT | 420 |

|                           |     |                                                               |     |
|---------------------------|-----|---------------------------------------------------------------|-----|
| <b>H5 246038 MiSeq</b>    | 421 | CATGAAACATCACTAGGGGTGAGCGCAGCTTGTCCATACCAGGGAGCGCCCTCCTTTTTTC | 480 |
| <b>H5 246038 Method A</b> | 421 | CATGAAACATCACTAGGGGTGAGCGCAGCTTGTCCATACCAGGGAGCGCCCTCCTTTTTTC | 480 |
| <b>H5 246038 Method S</b> | 421 | CATGAAACATCACTAGGGGTGAGCGCAGCTTGTCCATACCAGGGAGCGCCCTCCTTTTTTC | 480 |
| <b>H5 246038 Method E</b> | 421 | CATGAAACATCACTAGGGGTGAGCGCAGCTTGTCCATACCAGGGAGCGCCCTCCTTTTTTC | 480 |
| <b>H5 246038 Method K</b> | 421 | CATGAAACATCACTAGGGGTGAGCGCAGCTTGTCCATACCAGGGAGCGCCCTCCTTTTTTC | 480 |
| <b>H5 246038 Method N</b> | 421 | CATGAAACATCACTAGGGGTGAGCGCAGCTTGTCCATACCAGGGAGCGCCCTCCTTTTTTC | 480 |

|                           |     |                                                              |     |
|---------------------------|-----|--------------------------------------------------------------|-----|
| <b>H5 246038 MiSeq</b>    | 481 | AGAAATGTGGTGTGGCTTATCAAAAAGAACGATGCATACCCAACAATAAAGATAAGCTAC | 540 |
| <b>H5 246038 Method A</b> | 481 | AGAAATGTGGTGTGGCTTATCAAAAAGAACGATGCATACCCAACAATAAAGATAAGCTAC | 540 |
| <b>H5 246038 Method S</b> | 481 | AGAAATGTGGTGTGGCTTATCAAAAAGAACGATGCATACCCAACAATAAAGATAAGCTAC | 540 |
| <b>H5 246038 Method E</b> | 481 | AGAAATGTGGTGTGGCTTATCAAAAAGAACGATGCATACCCAACAATAAAGATAAGCTAC | 540 |
| <b>H5 246038 Method K</b> | 481 | AGAAATGTGGTGTGGCTTATCAAAAAGAACGATGCATACCCAACAATAAAGATAAGCTAC | 540 |
| <b>H5 246038 Method N</b> | 481 | AGAAATGTGGTGTGGCTTATCAAAAAGAACGATGCATACCCAACAATAAAGATAAGCTAC | 540 |

|                           |     |                                                               |     |
|---------------------------|-----|---------------------------------------------------------------|-----|
| <b>H5 246038 MiSeq</b>    | 541 | AATAATACCAATCGGGAAGATCTCTTGATACTGTGGGGGATTTCATCATTCCAACAATGCA | 600 |
| <b>H5 246038 Method A</b> | 541 | AATAATACCAATCGGGAAGATCTCTTGATACTGTGGGGGATTTCATCATTCCAACAATGCA | 600 |
| <b>H5 246038 Method S</b> | 541 | AATAATACCAATCGGGAAGATCTCTTGATACTGTGGGGGATTTCATCATTCCAACAATGCA | 600 |
| <b>H5 246038 Method E</b> | 541 | AATAATACCAATCGGGAAGATCTCTTGATACTGTGGGGGATTTCATCATTCCAACAATGCA | 600 |
| <b>H5 246038 Method K</b> | 541 | AATAATACCAATCGGGAAGATCTCTTGATACTGTGGGGGATTTCATCATTCCAACAATGCA | 600 |
| <b>H5 246038 Method N</b> | 541 | AATAATACCAATCGGGAAGATCTCTTGATACTGTGGGGGATTTCATCATTCCAACAATGCA | 600 |

|                           |     |                                                               |     |
|---------------------------|-----|---------------------------------------------------------------|-----|
| <b>H5 246038 MiSeq</b>    | 601 | GAAGAGCAGACAAATCTCTACAAAAACCCAACCACCTACATTTTCAGTTGGAACATCAACT | 660 |
| <b>H5 246038 Method A</b> | 601 | GAAGAGCAGACAAATCTCTACAAAAACCCAACCACCTACATTTTCAGTTGGAACATCAACT | 660 |
| <b>H5 246038 Method S</b> | 601 | GAAGAGCAGACAAATCTCTACAAAAACCCAACCACCTACATTTTCAGTTGGAACATCAACT | 660 |
| <b>H5 246038 Method E</b> | 601 | GAAGAGCAGACAAATCTCTACAAAAACCCAACCACCTACATTTTCAGTTGGAACATCAACT | 660 |
| <b>H5 246038 Method K</b> | 601 | GAAGAGCAGACAAATCTCTACAAAAACCCAACCACCTACATTTTCAGTTGGAACATCAACT | 660 |
| <b>H5 246038 Method N</b> | 601 | GAAGAGCAGACAAATCTCTACAAAAACCCAACCACCTACATTTTCAGTTGGAACATCAACT | 660 |

|                           |     |                                                              |     |
|---------------------------|-----|--------------------------------------------------------------|-----|
| <b>H5 246038 MiSeq</b>    | 661 | TTAAACCAGAGGTTGGCACCAAAAATAGCTACTAGATCCCAAGTAAACGGGCAACGTGGA | 720 |
| <b>H5 246038 Method A</b> | 661 | TTAAACCAGAGGTTGGCACCAAAAATAGCTACTAGATCCCAAGTAAACGGGCAACGTGGA | 720 |
| <b>H5 246038 Method S</b> | 661 | TTAAACCAGAGGTTGGCACCAAAAATAGCTACTAGATCCCAAGTAAACGGGCAACGTGGA | 720 |
| <b>H5 246038 Method E</b> | 661 | TTAAACCAGAGGTTGGCACCAAAAATAGCTACTAGATCCCAAGTAAACGGGCAACGTGGA | 720 |
| <b>H5 246038 Method K</b> | 661 | TTAAACCAGAGGTTGGCACCAAAAATAGCTACTAGATCCCAAGTAAACGGGCAACGTGGA | 720 |
| <b>H5 246038 Method N</b> | 661 | TTAAACCAGAGGTTGGCACCAAAAATAGCTACTAGATCCCAAGTAAACGGGCAACGTGGA | 720 |

|                    |     |                                                               |     |
|--------------------|-----|---------------------------------------------------------------|-----|
| H5 246038 MiSeq    | 721 | AGAATGGACTTCTTCTGGACAATCTTAAAACCAGATGATGCAATCCATTTTCGAGAGTAAT | 780 |
| H5 246038 Method A | 721 | AGAATGGACTTCTTCTGGACAATCTTAAAACCAGATGATGCAATCCATTTTCGAGAGTAAT | 780 |
| H5 246038 Method S | 721 | AGAATGGACTTCTTCTGGACAATCTTAAAACCAGATGATGCAATCCATTTTCGAGAGTAAT | 780 |
| H5 246038 Method E | 721 | AGAATGGACTTCTTCTGGACAATCTTAAAACCAGATGATGCAATCCATTTTCGAGAGTAAT | 780 |
| H5 246038 Method K | 721 | AGAATGGACTTCTTCTGGACAATCTTAAAACCAGATGATGCAATCCATTTTCGAGAGTAAT | 780 |
| H5 246038 Method N | 721 | AGAATGGACTTCTTCTGGACAATCTTAAAACCAGATGATGCAATCCATTTTCGAGAGTAAT | 780 |

|                    |     |                                                               |     |
|--------------------|-----|---------------------------------------------------------------|-----|
| H5 246038 MiSeq    | 781 | GGAAATTTTCATTGCTCCAGAATATGCATACAAAATTGTCAAGAAAGGGGACTCAACAATT | 840 |
| H5 246038 Method A | 781 | GGAAATTTTCATTGCTCCAGAATATGCATACAAAATTGTCAAGAAAGGGGACTCAACAATT | 840 |
| H5 246038 Method S | 781 | GGAAATTTTCATTGCTCCAGAATATGCATACAAAATTGTCAAGAAAGGGGACTCAACAATT | 840 |
| H5 246038 Method E | 781 | GGAAATTTTCATTGCTCCAGAATATGCATACAAAATTGTCAAGAAAGGGGACTCAACAATT | 840 |
| H5 246038 Method K | 781 | GGAAATTTTCATTGCTCCAGAATATGCATACAAAATTGTCAAGAAAGGGGACTCAACAATT | 840 |
| H5 246038 Method N | 781 | GGAAATTTTCATTGCTCCAGAATATGCATACAAAATTGTCAAGAAAGGGGACTCAACAATT | 840 |

|                    |     |                                                              |     |
|--------------------|-----|--------------------------------------------------------------|-----|
| H5 246038 MiSeq    | 841 | ATGAAAAGTGGAGTGGAATATGGCCACTGCAACACCAAATGTCAAACCCCAGTAGGTGCG | 900 |
| H5 246038 Method A | 841 | ATGAAAAGTGGAGTGGAATATGGCCACTGCAACACCAAATGTCAAACCCCAGTAGGTGCG | 900 |
| H5 246038 Method S | 841 | ATGAAAAGTGGAGTGGAATATGGCCACTGCAACACCAAATGTCAAACCCCAGTAGGTGCG | 900 |
| H5 246038 Method E | 841 | ATGAAAAGTGGAGTGGAATATGGCCACTGCAACACCAAATGTCAAACCCCAGTAGGTGCG | 900 |
| H5 246038 Method K | 841 | ATGAAAAGTGGAGTGGAATATGGCCACTGCAACACCAAATGTCAAACCCCAGTAGGTGCG | 900 |
| H5 246038 Method N | 841 | ATGAAAAGTGGAGTGGAATATGGCCACTGCAACACCAAATGTCAAACCCCAGTAGGTGCG | 900 |

|                    |     |                                                              |     |
|--------------------|-----|--------------------------------------------------------------|-----|
| H5 246038 MiSeq    | 901 | ATAAATTCTAGTATGCCATTCCACAACATACATCCTCTCACCATTGGGGAATGCCCCAAA | 960 |
| H5 246038 Method A | 901 | ATAAATTCTAGTATGCCATTCCACAACATACATCCTCTCACCATTGGGGAATGCCCCAAA | 960 |
| H5 246038 Method S | 901 | ATAAATTCTAGTATGCCATTCCACAACATACATCCTCTCACCATTGGGGAATGCCCCAAA | 960 |
| H5 246038 Method E | 901 | ATAAATTCTAGTATGCCATTCCACAACATACATCCTCTCACCATTGGGGAATGCCCCAAA | 960 |
| H5 246038 Method K | 901 | ATAAATTCTAGTATGCCATTCCACAACATACATCCTCTCACCATTGGGGAATGCCCCAAA | 960 |
| H5 246038 Method N | 901 | ATAAATTCTAGTATGCCATTCCACAACATACATCCTCTCACCATTGGGGAATGCCCCAAA | 960 |

|                           |     |                                                              |      |
|---------------------------|-----|--------------------------------------------------------------|------|
| <b>H5 246038 MiSeq</b>    | 961 | TACGTGAAGTCAAACAAGTTGGTCCTTGCGACTGGGCTCAGAAATAGTCCTCTAAGAGAA | 1020 |
| <b>H5 246038 Method A</b> | 961 | TACGTGAAGTCAAACAAGTTGGTCCTTGCGACTGGGCTCAGAAATAGTCCTCTAAGAGAA | 1020 |
| <b>H5 246038 Method S</b> | 961 | TACGTGAAGTCAAACAAGTTGGTCCTTGCGACTGGGCTCAGAAATAGTCCTCTAAGAGAA | 1020 |
| <b>H5 246038 Method E</b> | 961 | TACGTGAAGTCAAACAAGTTGGTCCTTGCGACTGGGCTCAGAAATAGTCCTCTAAGAGAA | 1020 |
| <b>H5 246038 Method K</b> | 961 | TACGTGAAGTCAAACAAGTTGGTCCTTGCGACTGGGCTCAGAAATAGTCCTCTAAGAGAA | 1020 |
| <b>H5 246038 Method N</b> | 961 | TACGTGAAGTCAAACAAGTTGGTCCTTGCGACTGGGCTCAGAAATAGTCCTCTAAGAGAA | 1020 |

|                           |      |                                                              |      |
|---------------------------|------|--------------------------------------------------------------|------|
| <b>H5 246038 MiSeq</b>    | 1021 | AAGAGAAGAAAAAGGGGCCTGTTTGGGGCGATAGCAGGGTTTATAGAGGGAGGATGGCAG | 1080 |
| <b>H5 246038 Method A</b> | 1021 | AAGAGAAGAAAAAGGGGCCTGTTTGGGGCGATAGCAGGGTTTATAGAGGGAGGATGGCAG | 1080 |
| <b>H5 246038 Method S</b> | 1021 | AAGAGAAGAAAAAGGGGCCTGTTTGGGGCGATAGCAGGGTTTATAGAGGGAGGATGGCAG | 1080 |
| <b>H5 246038 Method E</b> | 1021 | AAGAGAAGAAAAAGGGGCCTGTTTGGGGCGATAGCAGGGTTTATAGAGGGAGGATGGCAG | 1080 |
| <b>H5 246038 Method K</b> | 1021 | AAGAGAAGAAAAAGGGGCCTGTTTGGGGCGATAGCAGGGTTTATAGAGGGAGGATGGCAG | 1080 |
| <b>H5 246038 Method N</b> | 1021 | AAGAGAAGAAAAAGGGGCCTGTTTGGGGCGATAGCAGGGTTTATAGAGGGAGGATGGCAG | 1080 |

|                           |      |                                                              |      |
|---------------------------|------|--------------------------------------------------------------|------|
| <b>H5 246038 MiSeq</b>    | 1081 | GGAATGGTTGATGGTTGGTATGGGTACCATCATAGCAATGAGCAGGGGAGTGGATACGCT | 1140 |
| <b>H5 246038 Method A</b> | 1081 | GGAATGGTTGATGGTTGGTATGGGTACCATCATAGCAATGAGCAGGGGAGTGGATACGCT | 1140 |
| <b>H5 246038 Method S</b> | 1081 | GGAATGGTTGATGGTTGGTATGGGTACCATCATAGCAATGAGCAGGGGAGTGGATACGCT | 1140 |
| <b>H5 246038 Method E</b> | 1081 | GGAATGGTTGATGGTTGGTATGGGTACCATCATAGCAATGAGCAGGGGAGTGGATACGCT | 1140 |
| <b>H5 246038 Method K</b> | 1081 | GGAATGGTTGATGGTTGGTATGGGTACCATCATAGCAATGAGCAGGGGAGTGGATACGCT | 1140 |
| <b>H5 246038 Method N</b> | 1081 | GGAATGGTTGATGGTTGGTATGGGTACCATCATAGCAATGAGCAGGGGAGTGGATACGCT | 1140 |

|                           |      |                                                              |      |
|---------------------------|------|--------------------------------------------------------------|------|
| <b>H5 246038 MiSeq</b>    | 1141 | GCGGACAAAGAATCCACCCAAAAGGCAATAGATGGAGTTACCAATAAGGTCAACTCAATC | 1200 |
| <b>H5 246038 Method A</b> | 1141 | GCGGACAAAGAATCCACCCAAAAGGCAATAGATGGAGTTACCAATAAGGTCAACTCAATC | 1200 |
| <b>H5 246038 Method S</b> | 1141 | GCGGACAAAGAATCCACCCAAAAGGCAATAGATGGAGTTACCAATAAGGTCAACTCAATC | 1200 |
| <b>H5 246038 Method E</b> | 1141 | GCGGACAAAGAATCCACCCAAAAGGCAATAGATGGAGTTACCAATAAGGTCAACTCAATC | 1200 |
| <b>H5 246038 Method K</b> | 1141 | GCGGACAAAGAATCCACCCAAAAGGCAATAGATGGAGTTACCAATAAGGTCAACTCAATC | 1200 |
| <b>H5 246038 Method N</b> | 1141 | GCGGACAAAGAATCCACCCAAAAGGCAATAGATGGAGTTACCAATAAGGTCAACTCAATC | 1200 |

|                           |      |                                                               |      |
|---------------------------|------|---------------------------------------------------------------|------|
| <b>H5 246038 MiSeq</b>    | 1201 | ATTGACAAAATGAACACTCAATTTGAGGCAGTTGGAAGGGAGTTTAAATAACTTAGAAAGG | 1260 |
| <b>H5 246038 Method A</b> | 1201 | ATTGACAAAATGAACACTCAATTTGAGGCAGTTGGAAGGGAGTTTAAATAACTTAGAAAGG | 1260 |
| <b>H5 246038 Method S</b> | 1201 | ATTGACAAAATGAACACTCAATTTGAGGCAGTTGGAAGGGAGTTTAAATAACTTAGAAAGG | 1260 |
| <b>H5 246038 Method E</b> | 1201 | ATTGACAAAATGAACACTCAATTTGAGGCAGTTGGAAGGGAGTTTAAATAACTTAGAAAGG | 1260 |
| <b>H5 246038 Method K</b> | 1201 | ATTGACAAAATGAACACTCAATTTGAGGCAGTTGGAAGGGAGTTTAAATAACTTAGAAAGG | 1260 |
| <b>H5 246038 Method N</b> | 1201 | ATTGACAAAATGAACACTCAATTTGAGGCAGTTGGAAGGGAGTTTAAATAACTTAGAAAGG | 1260 |

|                           |      |                                                               |      |
|---------------------------|------|---------------------------------------------------------------|------|
| <b>H5 246038 MiSeq</b>    | 1261 | AGGATAGAGAATTTGAACAAGAAAATGGAAGACGGATTCCCTAGATGTCTGGACCTATAAT | 1320 |
| <b>H5 246038 Method A</b> | 1261 | AGGATAGAGAATTTGAACAAGAAAATGGAAGACGGATTCCCTAGATGTCTGGACCTATAAT | 1320 |
| <b>H5 246038 Method S</b> | 1261 | AGGATAGAGAATTTGAACAAGAAAATGGAAGACGGATTCCCTAGATGTCTGGACCTATAAT | 1320 |
| <b>H5 246038 Method E</b> | 1261 | AGGATAGAGAATTTGAACAAGAAAATGGAAGACGGATTCCCTAGATGTCTGGACCTATAAT | 1320 |
| <b>H5 246038 Method K</b> | 1261 | AGGATAGAGAATTTGAACAAGAAAATGGAAGACGGATTCCCTAGATGTCTGGACCTATAAT | 1320 |
| <b>H5 246038 Method N</b> | 1261 | AGGATAGAGAATTTGAACAAGAAAATGGAAGACGGATTCCCTAGATGTCTGGACCTATAAT | 1320 |

|                           |      |                                                              |      |
|---------------------------|------|--------------------------------------------------------------|------|
| <b>H5 246038 MiSeq</b>    | 1321 | GCTGAACTTCTAGTTCTCATGGAAAACGAGAGGACTCTAGATTTCCATGATTCAAATGTC | 1380 |
| <b>H5 246038 Method A</b> | 1321 | GCTGAACTTCTAGTTCTCATGGAAAACGAGAGGACTCTAGATTTCCATGATTCAAATGTC | 1380 |
| <b>H5 246038 Method S</b> | 1321 | GCTGAACTTCTAGTTCTCATGGAAAACGAGAGGACTCTAGATTTCCATGATTCAAATGTC | 1380 |
| <b>H5 246038 Method E</b> | 1321 | GCTGAACTTCTAGTTCTCATGGAAAACGAGAGGACTCTAGATTTCCATGATTCAAATGTC | 1380 |
| <b>H5 246038 Method K</b> | 1321 | GCTGAACTTCTAGTTCTCATGGAAAACGAGAGGACTCTAGATTTCCATGATTCAAATGTC | 1380 |
| <b>H5 246038 Method N</b> | 1321 | GCTGAACTTCTAGTTCTCATGGAAAACGAGAGGACTCTAGATTTCCATGATTCAAATGTC | 1380 |

|                           |      |                                                               |      |
|---------------------------|------|---------------------------------------------------------------|------|
| <b>H5 246038 MiSeq</b>    | 1381 | AAGAACCTTTACGACAAAGTCAGATTACAGCTTAGGGATAATGCAAAGGAGCTGGGTAAAC | 1440 |
| <b>H5 246038 Method A</b> | 1381 | AAGAACCTTTACGACAAAGTCAGATTACAGCTTAGGGATAATGCAAAGGAGCTGGGTAAAC | 1440 |
| <b>H5 246038 Method S</b> | 1381 | AAGAACCTTTACGACAAAGTCAGATTACAGCTTAGGGATAATGCAAAGGAGCTGGGTAAAC | 1440 |
| <b>H5 246038 Method E</b> | 1381 | AAGAACCTTTACGACAAAGTCAGATTACAGCTTAGGGATAATGCAAAGGAGCTGGGTAAAC | 1440 |
| <b>H5 246038 Method K</b> | 1381 | AAGAACCTTTACGACAAAGTCAGATTACAGCTTAGGGATAATGCAAAGGAGCTGGGTAAAC | 1440 |
| <b>H5 246038 Method N</b> | 1381 | AAGAACCTTTACGACAAAGTCAGATTACAGCTTAGGGATAATGCAAAGGAGCTGGGTAAAC | 1440 |

|                           |      |                                                              |      |
|---------------------------|------|--------------------------------------------------------------|------|
| <b>H5 246038 MiSeq</b>    | 1441 | GGCTGTTTCGAATTCTATCACAAATGTGATAATGAATGTATGGAAAGTGTGAAAAATGGG | 1500 |
| <b>H5 246038 Method A</b> | 1441 | GGCTGTTTCGAATTCTATCACAAATGTGATAATGAATGTATGGAAAGTGTGAAAAATGGG | 1500 |
| <b>H5 246038 Method S</b> | 1441 | GGCTGTTTCGAATTCTATCACAAATGTGATAATGAATGTATGGAAAGTGTGAAAAATGGG | 1500 |
| <b>H5 246038 Method E</b> | 1441 | GGCTGTTTCGAATTCTATCACAAATGTGATAATGAATGTATGGAAAGTGTGAAAAATGGG | 1500 |
| <b>H5 246038 Method K</b> | 1441 | GGCTGTTTCGAATTCTATCACAAATGTGATAATGAATGTATGGAAAGTGTGAAAAATGGG | 1500 |
| <b>H5 246038 Method N</b> | 1441 | GGCTGTTTCGAATTCTATCACAAATGTGATAATGAATGTATGGAAAGTGTGAAAAATGGG | 1500 |

|                           |      |                                                              |      |
|---------------------------|------|--------------------------------------------------------------|------|
| <b>H5 246038 MiSeq</b>    | 1501 | ACGTATGACTACCCTCAGTATTCAGAAGAAGCAAGATTAAAAAGAGAAGAAATAAGCGGA | 1560 |
| <b>H5 246038 Method A</b> | 1501 | ACGTATGACTACCCTCAGTATTCAGAAGAAGCAAGATTAAAAAGAGAAGAAATAAGCGGA | 1560 |
| <b>H5 246038 Method S</b> | 1501 | ACGTATGACTACCCTCAGTATTCAGAAGAAGCAAGATTAAAAAGAGAAGAAATAAGCGGA | 1560 |
| <b>H5 246038 Method E</b> | 1501 | ACGTATGACTACCCTCAGTATTCAGAAGAAGCAAGATTAAAAAGAGAAGAAATAAGCGGA | 1560 |
| <b>H5 246038 Method K</b> | 1501 | ACGTATGACTACCCTCAGTATTCAGAAGAAGCAAGATTAAAAAGAGAAGAAATAAGCGGA | 1560 |
| <b>H5 246038 Method N</b> | 1501 | ACGTATGACTACCCTCAGTATTCAGAAGAAGCAAGATTAAAAAGAGAAGAAATAAGCGGA | 1560 |

|                           |      |                                                              |      |
|---------------------------|------|--------------------------------------------------------------|------|
| <b>H5 246038 MiSeq</b>    | 1561 | GTGAAATTAGAATCAGTAGGAACTTACCAGATACTGTCAATTTATTCAACAGCGGCAAGT | 1620 |
| <b>H5 246038 Method A</b> | 1561 | GTGAAATTAGAATCAGTAGGAACTTACCAGATACTGTCAATTTATTCAACAGCGGCAAGT | 1620 |
| <b>H5 246038 Method S</b> | 1561 | GTGAAATTAGAATCAGTAGGAACTTACCAGATACTGTCAATTTATTCAACAGCGGCAAGT | 1620 |
| <b>H5 246038 Method E</b> | 1561 | GTGAAATTAGAATCAGTAGGAACTTACCAGATACTGTCAATTTATTCAACAGCGGCAAGT | 1620 |
| <b>H5 246038 Method K</b> | 1561 | GTGAAATTAGAATCAGTAGGAACTTACCAGATACTGTCAATTTATTCAACAGCGGCAAGT | 1620 |
| <b>H5 246038 Method N</b> | 1561 | GTGAAATTAGAATCAGTAGGAACTTACCAGATACTGTCAATTTATTCAACAGCGGCAAGT | 1620 |

|                           |      |                                                              |      |
|---------------------------|------|--------------------------------------------------------------|------|
| <b>H5 246038 MiSeq</b>    | 1621 | TCCCTAGCACTGGCAATCATGATGGCTGGTCTATCTTTATGGATGTGCTCCAATGGGTCG | 1680 |
| <b>H5 246038 Method A</b> | 1621 | TCCCTAGCACTGGCAATCATGATGGCTGGTCTATCTTTATGGATGTGCTCCAATGGGTCG | 1680 |
| <b>H5 246038 Method S</b> | 1621 | TCCCTAGCACTGGCAATCATGATGGCTGGTCTATCTTTATGGATGTGCTCCAATGGGTCG | 1680 |
| <b>H5 246038 Method E</b> | 1621 | TCCCTAGCACTGGCAATCATGATGGCTGGTCTATCTTTATGGATGTGCTCCAATGGGTCG | 1680 |
| <b>H5 246038 Method K</b> | 1621 | TCCCTAGCACTGGCAATCATGATGGCTGGTCTATCTTTATGGATGTGCTCCAATGGGTCG | 1680 |
| <b>H5 246038 Method N</b> | 1621 | TCCCTAGCACTGGCAATCATGATGGCTGGTCTATCTTTATGGATGTGCTCCAATGGGTCG | 1680 |

|                           |      |                           |      |
|---------------------------|------|---------------------------|------|
| <b>H5 246038 MiSeq</b>    | 1681 | TTACAGTGCAGAAATTTGCATTTAG | 1704 |
| <b>H5 246038 Method A</b> | 1681 | TTACAGTGCAGAAATTTGCATTTAG | 1704 |
| <b>H5 246038 Method S</b> | 1681 | TTACAGTGCAGAAATTTGCATTTAG | 1704 |
| <b>H5 246038 Method E</b> | 1681 | TTACAGTGCAGAAATTTGCATTTAG | 1704 |
| <b>H5 246038 Method K</b> | 1681 | TTACAGTGCAGAAATTTGCATTTAG | 1704 |
| <b>H5 246038 Method N</b> | 1681 | TTACAGTGCAGAAATTTGCATTTAG | 1704 |
