# Supplementary material for: An Evaluation of Avian Influenza Virus Whole Genome Sequencing Approaches Using Nanopore Technology
Source: Preprints.org preprint supplement (doi:10.20944/preprints202301.0480.v1), 2023-01-26
Supplement: Supplementary file 56 [file supplementary]

## Formatted Alignments

|                    |     |                                                              |     |
|--------------------|-----|--------------------------------------------------------------|-----|
| MA 245625 MiSeq    | 1   | ATGAGTCTTCTAACCGAGGTCGAAACGTACGTTCTCTCTATCGTCCCGTCAGGCCCCCTC | 60  |
| MA 245626 Method A | 1   | ATGAGTCTTCTAACCGAGGTCGAAACGTACGTTCTCTCTATCGTCCCGTCAGGCCCCCTC | 60  |
| MA 245626 Method S | 1   | ATGAGTCTTCTAACCGAGGTCGAAACGTACGTTCTCTCTATCGTCCCGTCAGGCCCCCTC | 60  |
| MA 245626 Method K | 1   | ATGAGTCTTCTAACCGAGGTCGAAACGTACGTTCTCTCTATCGTCCCGTCAGGCCCCCTC | 60  |
| MA 245626 Method N | 1   | ATGAGTCTTCTAACCGAGGTCGAAACGTACGTTCTCTCTATCGTCCCGTCAGGCCCCCTC | 60  |
|                    |     |                                                              |     |
| MA 245625 MiSeq    | 61  | AAAGCCGAGATCGCGCAGAGACTTGAAGATGTCTTTGCAGGGAAGAACACCGATCTTGAG | 120 |
| MA 245626 Method A | 61  | AAAGCCGAGATCGCGCAGAGACTTGAAGATGTCTTTGCAGGGAAGAACACCGATCTTGAG | 120 |
| MA 245626 Method S | 61  | AAAGCCGAGATCGCGCAGAGACTTGAAGATGTCTTTGCAGGGAAGAACACCGATCTTGAG | 120 |
| MA 245626 Method K | 61  | AAAGCCGAGATCGCGCAGAGACTTGAAGATGTCTTTGCAGGGAAGAACACCGATCTTGAG | 120 |
| MA 245626 Method N | 61  | AAAGCCGAGATCGCGCAGAGACTTGAAGATGTCTTTGCAGGGAAGAACACCGATCTTGAG | 120 |
|                    |     |                                                              |     |
| MA 245625 MiSeq    | 121 | GCTCTCATGGAATGGCTAAAGACAAGACCAATCCTGTACCTCTGACTAAGGGGATTTTG  | 180 |
| MA 245626 Method A | 121 | GCTCTCATGGAATGGCTAAAGACAAGACCAATCCTGTACCTCTGACTAAGGGGATTTTG  | 180 |
| MA 245626 Method S | 121 | GCTCTCATGGAATGGCTAAAGACAAGACCAATCCTGTACCTCTGACTAAGGGGATTTTG  | 180 |
| MA 245626 Method K | 121 | GCTCTCATGGAATGGCTAAAGACAAGACCAATCCTGTACCTCTGACTAAGGGGATTTTG  | 180 |
| MA 245626 Method N | 121 | GCTCTCATGGAATGGCTAAAGACAAGACCAATCCTGTACCTCTGACTAAGGGGATTTTG  | 180 |
|                    |     |                                                              |     |
| MA 245625 MiSeq    | 181 | GGATTTGTGTTTCACGCTCACCGTGCCAGTGAGCGAGGACTGCAGCGTAGACGCTTTGTC | 240 |
| MA 245626 Method A | 181 | GGATTTGTGTTTCACGCTCACCGTGCCAGTGAGCGAGGACTGCAGCGTAGACGCTTTGTC | 240 |
| MA 245626 Method S | 181 | GGATTTGTGTTTCACGCTCACCGTGCCAGTGAGCGAGGACTGCAGCGTAGACGCTTTGTC | 240 |
| MA 245626 Method K | 181 | GGATTTGTGTTTCACGCTCACCGTGCCAGTGAGCGAGGACTGCAGCGTAGACGCTTTGTC | 240 |
| MA 245626 Method N | 181 | GGATTTGTGTTTCACGCTCACCGTGCCAGTGAGCGAGGACTGCAGCGTAGACGCTTTGTC | 240 |
|                    |     |                                                              |     |
| MA 245625 MiSeq    | 241 | CAAAATGCTCTAAATGGAAATGGAGACCCAAACAACATGGACAGGGCAGTCAAGTTGTAC | 300 |
| MA 245626 Method A | 241 | CAAAATGCTCTAAATGGAAATGGAGACCCAAACAACATGGACAGGGCAGTCAAGTTGTAC | 300 |
| MA 245626 Method S | 241 | CAAAATGCTCTAAATGGAAATGGAGACCCAAACAACATGGACAGGGCAGTCAAGTTGTAC | 300 |
| MA 245626 Method K | 241 | CAAAATGCTCTAAATGGAAATGGAGACCCAAACAACATGGACAGGGCAGTCAAGTTGTAC | 300 |
| MA 245626 Method N | 241 | CAAAATGCTCTAAATGGAAATGGAGACCCAAACAACATGGACAGGGCAGTCAAGTTGTAC | 300 |

|                    |     |                                                               |     |
|--------------------|-----|---------------------------------------------------------------|-----|
| MA 245625 MiSeq    | 301 | AGGAAACTGAAGAGAGAGATAAACATTCCATGGGGCTAAAGAAGTTGCACTCAGTTACTCA | 360 |
| MA 245626 Method A | 301 | AGGAAACTGAAGAGAGAGATAAACATTCCATGGGGCTAAAGAAGTTGCACTCAGTTACTCA | 360 |
| MA 245626 Method S | 301 | AGGAAACTGAAGAGAGAGATAAACATTCCATGGGGCTAAAGAAGTTGCACTCAGTTACTCA | 360 |
| MA 245626 Method K | 301 | AGGAAACTGAAGAGAGAGATAAACATTCCATGGGGCTAAAGAAGTTGCACTCAGTTACTCA | 360 |
| MA 245626 Method N | 301 | AGGAAACTGAAGAGAGAGATAAACATTCCATGGGGCTAAAGAAGTTGCACTCAGTTACTCA | 360 |

|                    |     |                                                              |     |
|--------------------|-----|--------------------------------------------------------------|-----|
| MA 245625 MiSeq    | 361 | ACCGGTGCACTTGCCAGTTGTATGGGTCTCATATACAACAGGATGGGGACGGTGACCGCA | 420 |
| MA 245626 Method A | 361 | ACCGGTGCACTTGCCAGTTGTATGGGTCTCATATACAACAGGATGGGGACGGTGACCGCA | 420 |
| MA 245626 Method S | 361 | ACCGGTGCACTTGCCAGTTGTATGGGTCTCATATACAACAGGATGGGGACGGTGACCGCA | 420 |
| MA 245626 Method K | 361 | ACCGGTGCACTTGCCAGTTGTATGGGTCTCATATACAACAGGATGGGGACGGTGACCGCA | 420 |
| MA 245626 Method N | 361 | ACCGGTGCACTTGCCAGTTGTATGGGTCTCATATACAACAGGATGGGGACGGTGACCGCA | 420 |

|                    |     |                                                             |     |
|--------------------|-----|-------------------------------------------------------------|-----|
| MA 245625 MiSeq    | 421 | GAAGTGGCATTGGGCCTAGTGTGTGCCACCTGTGAGCAGATTGCTGATTACAGCATCGG | 480 |
| MA 245626 Method A | 421 | GAAGTGGCATTGGGCCTAGTGTGTGCCACCTGTGAGCAGATTGCTGATTACAGCATCGG | 480 |
| MA 245626 Method S | 421 | GAAGTGGCATTGGGCCTAGTGTGTGCCACCTGTGAGCAGATTGCTGATTACAGCATCGG | 480 |
| MA 245626 Method K | 421 | GAAGTGGCATTGGGCCTAGTGTGTGCCACCTGTGAGCAGATTGCTGATTACAGCATCGG | 480 |
| MA 245626 Method N | 421 | GAAGTGGCATTGGGCCTAGTGTGTGCCACCTGTGAGCAGATTGCTGATTACAGCATCGG | 480 |

|                    |     |                                                              |     |
|--------------------|-----|--------------------------------------------------------------|-----|
| MA 245625 MiSeq    | 481 | TCTCACAGACAGATAGCTACCACCACCAACCCACTAATCAGACATGAAAACAGAATGGTG | 540 |
| MA 245626 Method A | 481 | TCTCACAGACAGATAGCTACCACCACCAACCCACTAATCAGACATGAAAACAGAATGGTG | 540 |
| MA 245626 Method S | 481 | TCTCACAGACAGATAGCTACCACCACCAACCCACTAATCAGACATGAAAACAGAATGGTG | 540 |
| MA 245626 Method K | 481 | TCTCACAGACAGATAGCTACCACCACCAACCCACTAATCAGACATGAAAACAGAATGGTG | 540 |
| MA 245626 Method N | 481 | TCTCACAGACAGATAGCTACCACCACCAACCCACTAATCAGACATGAAAACAGAATGGTG | 540 |

|                    |     |                                                              |     |
|--------------------|-----|--------------------------------------------------------------|-----|
| MA 245625 MiSeq    | 541 | TTGGCCAGTACTACAGCTAAGGCTATGGAGCAGATGGCTGGATCGAGTGAGCAAGCAGTG | 600 |
| MA 245626 Method A | 541 | TTGGCCAGTACTACAGCTAAGGCTATGGAGCAGATGGCTGGATCGAGTGAGCAAGCAGTG | 600 |
| MA 245626 Method S | 541 | TTGGCCAGTACTACAGCTAAGGCTATGGAGCAGATGGCTGGATCGAGTGAGCAAGCAGTG | 600 |
| MA 245626 Method K | 541 | TTGGCCAGTACTACAGCTAAGGCTATGGAGCAGATGGCTGGATCGAGTGAGCAAGCAGTG | 600 |
| MA 245626 Method N | 541 | TTGGCCAGTACTACAGCTAAGGCTATGGAGCAGATGGCTGGATCGAGTGAGCAAGCAGTG | 600 |

|                    |     |                                                              |     |
|--------------------|-----|--------------------------------------------------------------|-----|
| MA 245625 MiSeq    | 601 | GAAGCCATGGAGGTTGCTAGTCAGGCTAGGCAGATGGTGCAGGCGATGAGGACCATTGGA | 660 |
| MA 245626 Method A | 601 | GAAGCCATGGAGGTTGCTAGTCAGGCTAGGCAGATGGTGCAGGCGATGAGGACCATTGGA | 660 |
| MA 245626 Method S | 601 | GAAGCCATGGAGGTTGCTAGTCAGGCTAGGCAGATGGTGCAGGCGATGAGGACCATTGGA | 660 |
| MA 245626 Method K | 601 | GAAGCCATGGAGGTTGCTAGTCAGGCTAGGCAGATGGTGCAGGCGATGAGGACCATTGGA | 660 |
| MA 245626 Method N | 601 | GAAGCCATGGAGGTTGCTAGTCAGGCTAGGCAGATGGTGCAGGCGATGAGGACCATTGGA | 660 |

|                    |     |                                                              |     |
|--------------------|-----|--------------------------------------------------------------|-----|
| MA 245625 MiSeq    | 661 | ACTCATCCTAGCTCCAGTGCCGGTCTGAGAGATGATCTCCTTGAAAATTTGCAGGCCTAC | 720 |
| MA 245626 Method A | 661 | ACTCATCCTAGCTCCAGTGCCGGTCTGAGAGATGATCTCCTTGAAAATTTGCAGGCCTAC | 720 |
| MA 245626 Method S | 661 | ACTCATCCTAGCTCCAGTGCCGGTCTGAGAGATGATCTCCTTGAAAATTTGCAGGCCTAC | 720 |
| MA 245626 Method K | 661 | ACTCATCCTAGCTCCAGTGCCGGTCTGAGAGATGATCTCCTTGAAAATTTGCAGGCCTAC | 720 |
| MA 245626 Method N | 661 | ACTCATCCTAGCTCCAGTGCCGGTCTGAGAGATGATCTCCTTGAAAATTTGCAGGCCTAC | 720 |

|                    |     |                                                              |     |
|--------------------|-----|--------------------------------------------------------------|-----|
| MA 245625 MiSeq    | 721 | CAAAAACGGATGGGAGTGCAACTGCAGCGATTCAAGTGATCCTCTCGTTATTGCCGCAAG | 780 |
| MA 245626 Method A | 721 | CAAAAACGGATGGGAGTGCAACTGCAGCGATTCAAGTGATCCTCTCGTTATTGCCGCAAG | 780 |
| MA 245626 Method S | 721 | CAAAAACGGATGGGAGTGCAACTGCAGCGATTCAAGTGATCCTCTCGTTATTGCCGCAAG | 780 |
| MA 245626 Method K | 721 | CAAAAACGGATGGGAGTGCAACTGCAGCGATTCAAGTGATCCTCTCGTTATTGCCGCAAG | 780 |
| MA 245626 Method N | 721 | CAAAAACGGATGGGAGTGCAACTGCAGCGATTCAAGTGATCCTCTCGTTATTGCCGCAAG | 780 |

|                    |     |                                                              |     |
|--------------------|-----|--------------------------------------------------------------|-----|
| MA 245625 MiSeq    | 781 | TATCGTTGGGATCTTGCACTTGATATTGTGGATTCTTGATCGCCTTTTCTTCAAATGCGT | 840 |
| MA 245626 Method A | 781 | TATCGTTGGGATCTTGCACTTGATATTGTGGATTCTTGATCGCCTTTTCTTCAAATGCGT | 840 |
| MA 245626 Method S | 781 | TATCGTTGGGATCTTGCACTTGATATTGTGGATTCTTGATCGCCTTTTCTTCAAATGCGT | 840 |
| MA 245626 Method K | 781 | TATCGTTGGGATCTTGCACTTGATATTGTGGATTCTTGATCGCCTTTTCTTCAAATGCGT | 840 |
| MA 245626 Method N | 781 | TATCGTTGGGATCTTGCACTTGATATTGTGGATTCTTGATCGCCTTTTCTTCAAATGCGT | 840 |

|                    |     |                                                              |     |
|--------------------|-----|--------------------------------------------------------------|-----|
| MA 245625 MiSeq    | 841 | TTATCGTCGCCTTAAATACGGTTTGAAAGGAGGGCCTTCTACGGAAGGAGTACCTGAGTC | 900 |
| MA 245626 Method A | 841 | TTATCGTCGCCTTAAATACGGTTTGAAAGGAGGGCCTTCTACGGAAGGAGTACCTGAGTC | 900 |
| MA 245626 Method S | 841 | TTATCGTCGCCTTAAATACGGTTTGAAAGGAGGGCCTTCTACGGAAGGAGTACCTGAGTC | 900 |
| MA 245626 Method K | 841 | TTATCGTCGCCTTAAATACGGTTTGAAAGGAGGGCCTTCTACGGAAGGAGTACCTGAGTC | 900 |
| MA 245626 Method N | 841 | TTATCGTCGCCTTAAATACGGTTTGAAAGGAGGGCCTTCTACGGAAGGAGTACCTGAGTC | 900 |

|                           |     |                                                              |     |
|---------------------------|-----|--------------------------------------------------------------|-----|
| <b>MA 245625 MiSeq</b>    | 901 | CATGAGGGAAGAGTACCGGCAGGAACAGCAGAGTGCTGTGGATGTTGACGATGGTCATTT | 960 |
| <b>MA 245626 Method A</b> | 901 | CATGAGGGAAGAGTACCGGCAGGAACAGCAGAGTGCTGTGGATGTTGACGATGGTCATTT | 960 |
| <b>MA 245626 Method S</b> | 901 | CATGAGGGAAGAGTACCGGCAGGAACAGCAGAGTGCTGTGGATGTTGACGATGGTCATTT | 960 |
| <b>MA 245626 Method K</b> | 901 | CATGAGGGAAGAGTACCGGCAGGAACAGCAGAGTGCTGTGGATGTTGACGATGGTCATTT | 960 |
| <b>MA 245626 Method N</b> | 901 | CATGAGGGAAGAGTACCGGCAGGAACAGCAGAGTGCTGTGGATGTTGACGATGGTCATTT | 960 |

|                           |     |                        |     |
|---------------------------|-----|------------------------|-----|
| <b>MA 245625 MiSeq</b>    | 961 | TGTCAACATAGAGCTGGAGTAA | 982 |
| <b>MA 245626 Method A</b> | 961 | TGTCAACATAGAGCTGGAGTAA | 982 |
| <b>MA 245626 Method S</b> | 961 | TGTCAACATAGAGCTGGAGTAA | 982 |
| <b>MA 245626 Method K</b> | 961 | TGTCAACATAGAGCTGGAGTAA | 982 |
| <b>MA 245626 Method N</b> | 961 | TGTCAACATAGAGCTGGAGTAA | 982 |
